# Supplementary material for: Opti-nQL: An Optimized, Versatile and Sensitive Nano-LC Method for MS-Based Lipidomics Analysis
Source: MDPI journal article supplement (doi:10.3390/metabo11110720), 2021-10-21
Supplement: s1 [file s1]

# Opti-nQL: an optimized, versatile and sensitive nano-LC method for MS-based lipidomics analysis

Angela Cattaneo<sup>1</sup>, Giuseppe Martano<sup>2</sup>, Umberto Restuccia<sup>3,4</sup>, Laura Tronci<sup>3,5</sup>, Michele Bianchi<sup>1</sup>, Angela Bachi<sup>3\*†</sup>, Vittoria Matafora<sup>3†</sup>

<sup>1</sup> Cogentech SRL Benefit Corporation, 20139 Milan, Italy.

<sup>2</sup> Institute of Neurosciences, CNR, 20133 Milan, Italy

<sup>3</sup> IFOM, The FIRC Institute of Molecular Oncology, 20139 Milan, Italy.

<sup>4</sup> Present address: ADIENNE Pharma & Biotech, Caponago, Italy

<sup>5</sup> IRCCS San Raffaele Scientific Institute, Molecular Basis of Cystic Kidney Diseases, Division of Genetics and Cell Biology, 20132 Milan, Italy.

\* Correspondence: angela.bachi@ifom.eu +39 02 574303 873. IFOM - the FIRC Institute of Molecular Oncology, via Adamello 16, 20139 Milan, Italy

† These authors contributed equally

**Table S1. Limit of detection (LOD) and limit of quantification (LOQ) of Internal standards.** LOD and LOQ was expressed as 3.3 and 10 times respectively of the ratio between the standard deviation of the response and the slope of the calibration curve. LOD and LOQ were determined by weighted linear regression.

| Lipid standard                | LOD (fmol) | LOQ(fmol) | R2     | SLOPE       |
|-------------------------------|------------|-----------|--------|-------------|
| PC(12:0/13:0)                 | 18.41      | 60.75     | 0.9872 | 1495410.714 |
| Lactosylceramide (d18:1/12:0) | 42.33      | 139.68    | 0.9691 | 553137.7551 |
| Ceramide (d18:1/25:0)         | 19.67      | 64.92     | 0.9448 | 11076835.2  |
| Glucosylceramide (d18:1/12:0) | 4.28       | 14.12     | 0.9956 | 608352.551  |
| PE(12:0/13:0)                 | 45.80      | 151.13    | 0.9691 | 335421.9388 |
| PI(12:0/13:0)                 | 56.55      | 186.63    | 0.9642 | 238864.2857 |
| PG(12:0/13:0)                 | 3.70       | 12.21     | 0.9913 | 18711.22449 |
| Cholester(19:0)               | 69.12      | 228.10    | 0.9878 | 3320092.857 |
| Sphinganine(d17:0)            | 27.80      | 91.74     | 0.9658 | 417341.3265 |
| Sphingosine(d17:1)            | 22.23      | 73.36     | 0.9605 | 299355.102  |
| Sphingosine-1-P(d17:1)        | 95.50      | 315.16    | 0.9552 | 3506.6      |
| Gal-B-Sphingosine(d17:1)      | 3.66       | 12.08     | 0.9936 | 6058377.041 |
| DG(14:0/0:0/14:0) (d5)        | 10.46      | 34.52     | 0.9919 | 731854.5918 |
| DG(15:0/0:0/15:0) (d5)        | 14.94      | 49.30     | 0.9877 | 479490.3061 |
| DG(16:0/0:0/16:0) (d5)        | 8.03       | 26.50     | 0.9965 | 632066.3265 |
| DG(17:0/0:0/17:0) (d5)        | 4.91       | 16.21     | 0.9959 | 1395901.531 |
| DG(19:0/0:0/19:0) (d5)        | 14.31      | 47.24     | 0.9821 | 991718.8776 |
| DG(20:0/0:0/20:0) (d5)        | 2.42       | 7.99      | 0.9946 | 1181827.041 |
| DG(20:2/0:0/20:2) (d5)        | 3.00       | 9.88      | 0.9979 | 2711297.449 |
| DG(20:4/0:0/20:4) (d5)        | 15.21      | 50.20     | 0.9924 | 831782.6531 |
| DG(20:5/0:0/20:5) (d5)        | 14.05      | 46.35     | 0.9866 | 1176214.796 |
| TG(14:0/16:1/14:0) (d5)       | 3.90       | 12.87     | 0.9976 | 7007694.898 |
| TG(20:5/22:6/20:5) (d5)       | 8.58       | 28.31     | 0.9947 | 7822575     |
| TG(15:0/18:1/15:0) (d5)       | 1.09       | 3.61      | 0.9992 | 6968257.143 |
| TG(16:0/18:0/16:0) (d5)       | 5.76       | 19.02     | 0.9968 | 27252666.84 |
| TG(17:0/17:1/17:0) (d5)       | 3.88       | 12.79     | 0.9981 | 7515920.408 |
| TG(19:0/12:0/19:0) (d5)       | 5.76       | 19.02     | 0.9968 | 27252666.84 |

|                         |        |         |        |             |
|-------------------------|--------|---------|--------|-------------|
| TG(20:2/18:3/20:2) (d5) | 2.47   | 8.14    | 0.9985 | 7404169.388 |
| TG(20:4/18:2/20:4) (d5) | 3.57   | 11.77   | 0.9969 | 7426656.122 |
| PS(12:0/13:0)           | 51.01  | 168.33  | 0.9451 | 6313225.444 |
| Chol-d7                 | 681.69 | 2249.57 | 0.9803 | 1316296.429 |

### A Ammonium formate

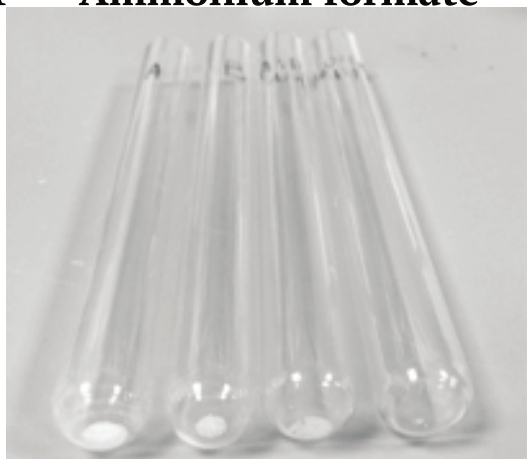

buffer A1 B1 A1:B1=1:1 A1:B1=1:1  
no NH<sub>4</sub>COOH

### B Ammonium acetate

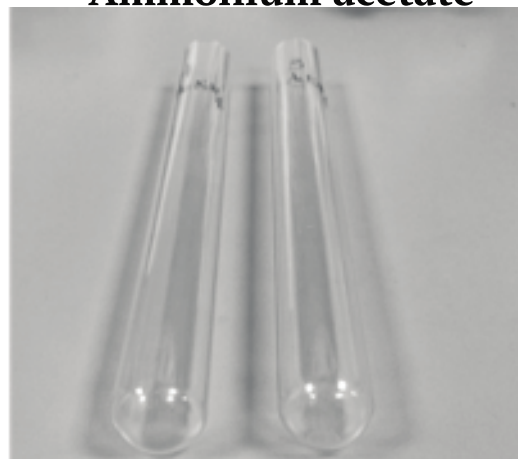

buffer A2 B2

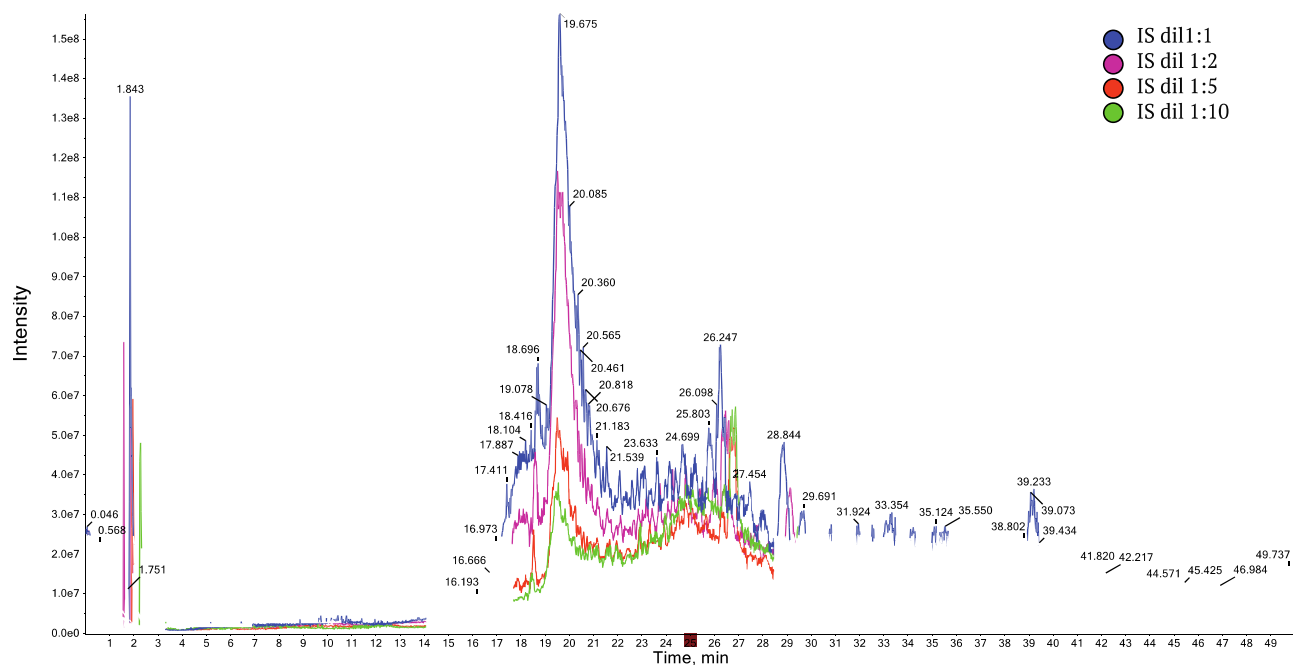

**Figure S2. Total ion chromatogram (TIC) of Internal Standards (IS) mix at different concentrations.** The IS mix was sequentially diluted from 1:1 to 1:10, where 1 corresponds to 1/250 of the IS concentration reported in table1, and analyzed with Peak View.

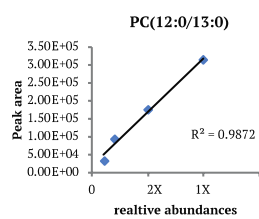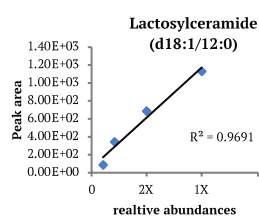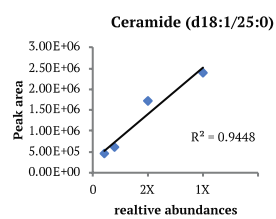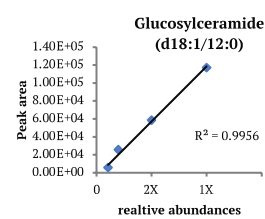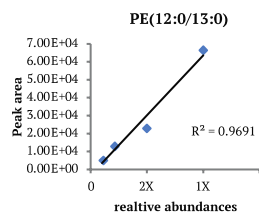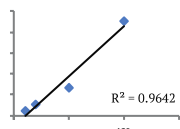

ngosine

0 2X 1X

**Figure S3. Internal standards linearity evaluation.** The graphs report the peak areas obtained by integrating the IS peaks with PeakView for each IS analyzed in sequential dilutions (1X-2X-5X-10X), where 1X corresponds to 1/250 of the IS concentration reported in table1. R square values indicate the linearity for each IS.

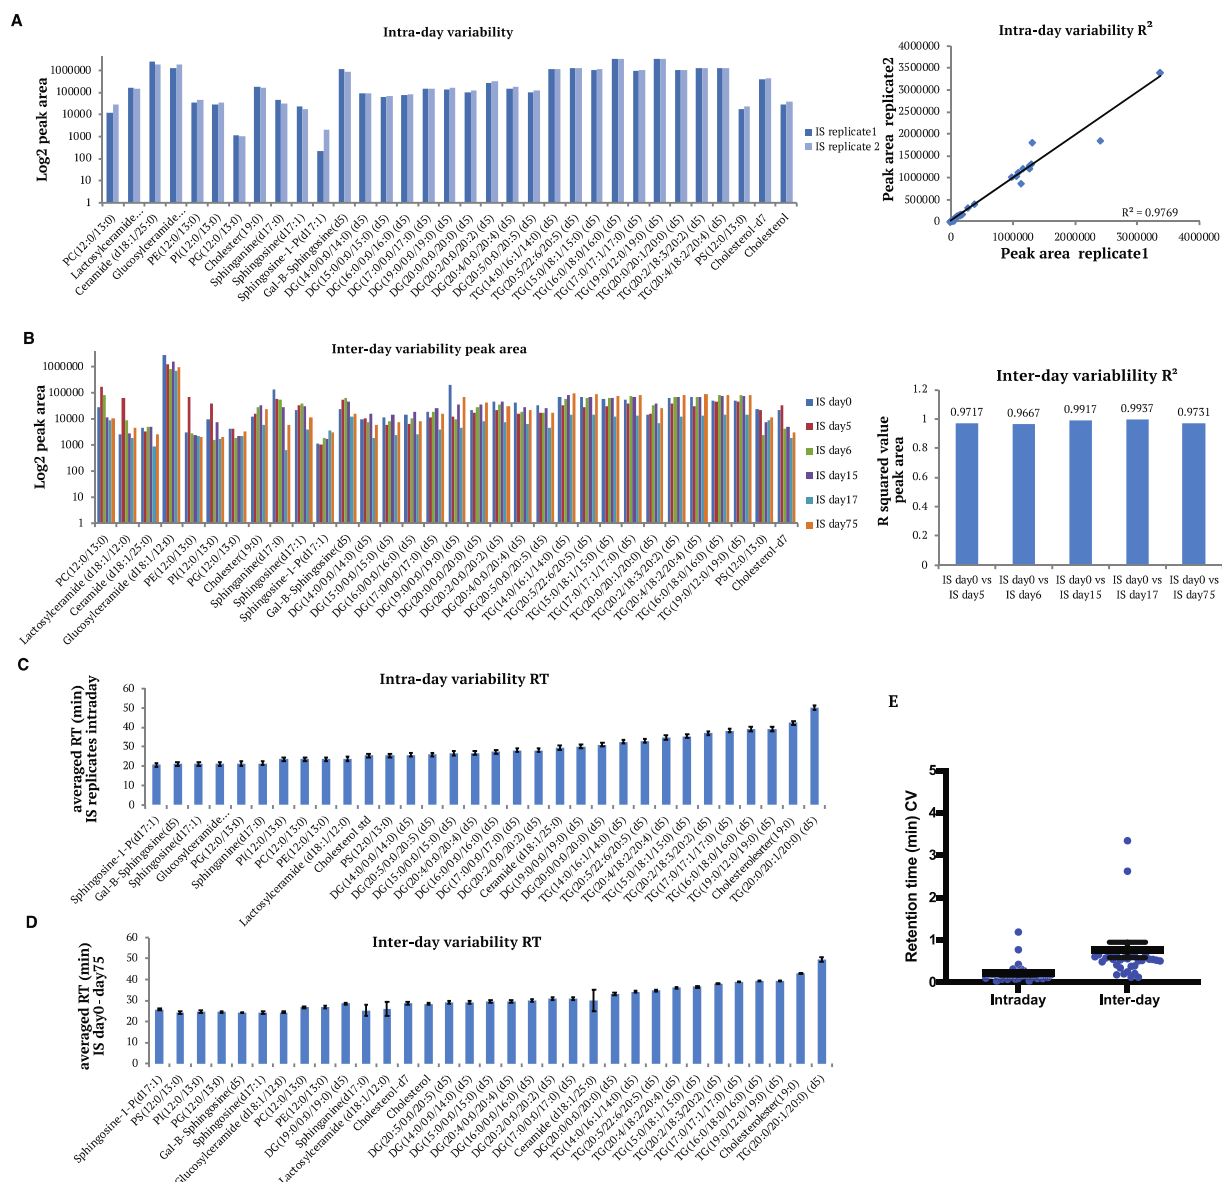

**Figure S4. Internal standards intra- and inter-day variability.** Panel A: intra-day variability measured as intensity of peak areas for IS replicate 1 and 2 analyzed the same day. Panel B: inter-day variability measured as intensity of peak areas for IS replicates (day 0, 5, 6, 15, 17 and 75). Panel C: intra-day variability of retention times (RT) for IS replicate 1 and replicate 2 analyzed the same day. Panel D: inter-day variability of RT for IS replicates measured at day 0 and 75. Panel E: comparison of the coefficient of variation of the retention time of each IS measured in intra-day and inter-day replicates.

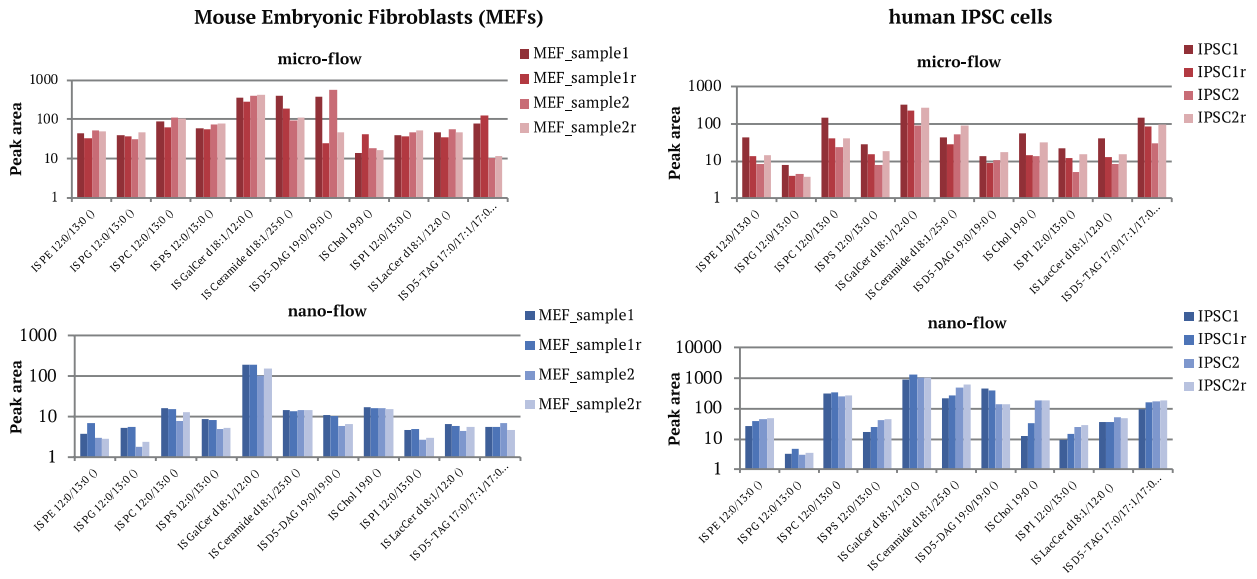

**Figure S5. Internal standards profile in MEFs and IPSC samples.** The Log2 of the peak area is reported for each internal standard.

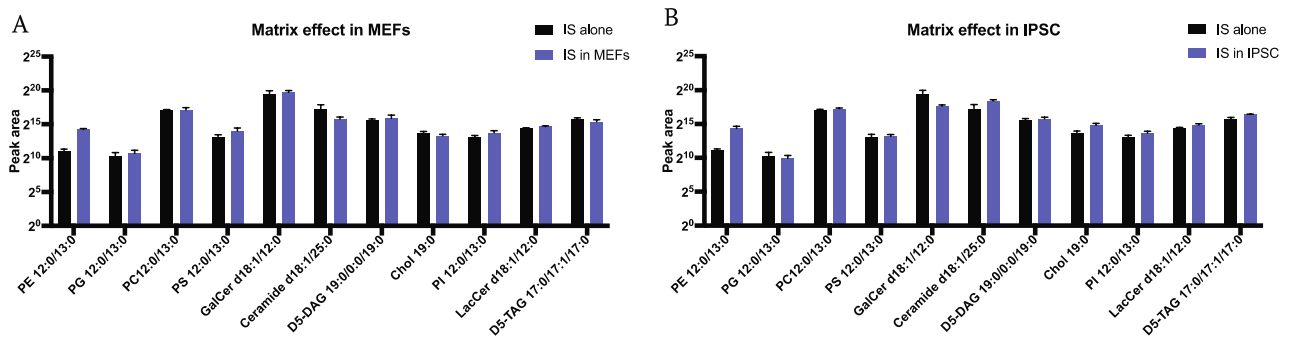

**Figure S6. Matrix Effect of IS in MEFs and IPSC samples.** The matrix effect was evaluated by comparing the response of the internal standards analyzed both alone and spiked into the lipid extracts of MEFs and IPSC at the same concentration. The Log2 of the peak area is reported for each internal standard.

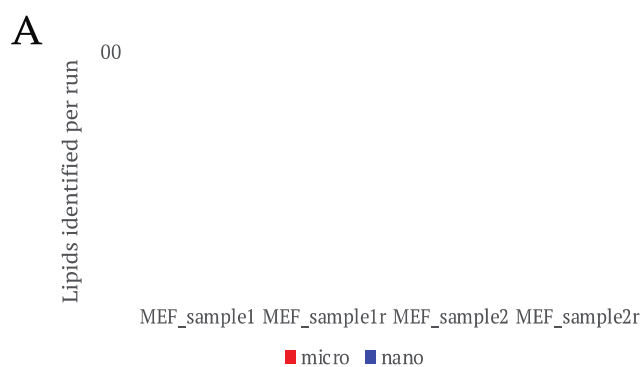

**B**

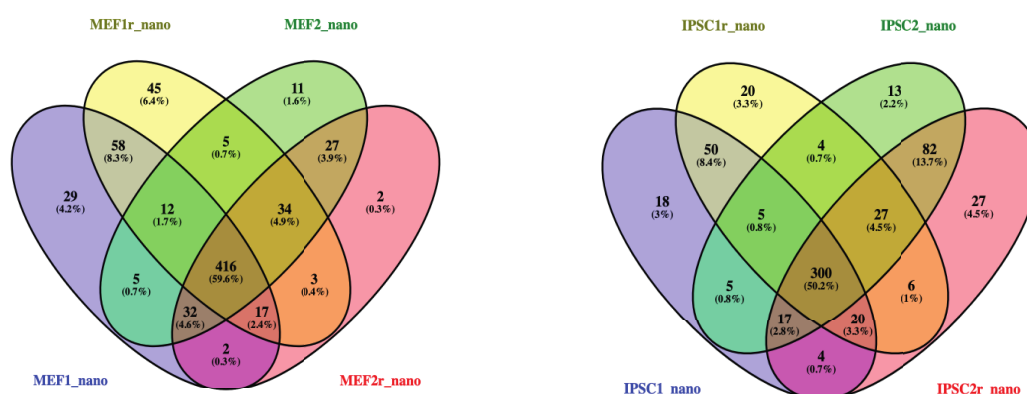

**Figure S7. Lipids identified and quantified per run in MEFs and IPSC samples analyzed both in micro and nano-flow method.** Panel A: Total lipids identified and quantified per run of MEFs and IPSC samples. Panel B: Venny diagram of the shared lipids identified and quantified across all the runs of MEFs and IPSC samples analyzed both in micro and nano-flow method.
