# Supplementary material for: Opti-nQL: An Optimized, Versatile and Sensitive Nano-LC Method for MS-Based Lipidomics Analysis
Source: Metabolites. 2021 Oct 21;11(11):720. doi: 10.3390/metabo11110720 (PMC8623082; doi:10.3390/metabo11110720)
Supplement: Supplementary file 1 [file metabolites-11-00720-s001.zip › Supplementary/Supplementary Tables Rev.xlsx]

## Sheet: Supplementary Table2
Table S2: Peak areas of the lipid species identified by LipidView for lipidomics analysis of MEFs cells in micro flow LCMSMS					Table S5: Peak areas of the lipid species identified by LipidView for lipidomics analysis of WM115 cells in nano flow LCMSMS
Micro_MEF
Micro_Lipid Species Peak area	MEF_sample1	MEF_sample1r	MEF_sample2	MEF_sample2r	Nano_Lipid Species Peak area
CE 14:1+NH4	20.6138	0	20.9418	25.3736	CE 14:1+NH4
CE 16:1+NH4	0	26.9751	32.9673	27.9373	CE 16:1+NH4
CE 18:1+NH4	0	0	93.1979	27.2455	CE 18:0+NH4
CE 18:2+NH4	0	0	15.4935	13.5325	CE 18:1+NH4
CE 20:2+NH4	0	0	0	21.8264	CE 18:2+NH4
Cer 28:1;2	0	0	0	4.4394	CE 20:0+NH4
Cer 30:1;2	0	0	7.8295	9.9796	CE 20:1+NH4
Cer 32:0;2	0	0	0	12.5191	CE 20:2+NH4
Cer 32:0;3	45.1526	42.8977	41.6995	40.3093	CE 20:3+NH4
Cer 32:1;2	0	0	9.9308	10.0337	Cer 28:0;2
Cer 32:1;3	0	0	0	6.6362	Cer 28:1;2
Cer 32:2;2	0	0	0	12.1373	Cer 30:0;2
Cer 34:0;2	0	0	0	6.8769	Cer 30:1;2
Cer 34:0;3	0	16.4037	0	14.6087	Cer 30:2;2
Cer 34:1;2	7.2921	0	19.879	14.2798	Cer 32:0;2
Cer 34:1;3	0	0	0	15.2884	Cer 32:0;3
Cer 34:2;2	0	0	0	8.2067	Cer 32:1;2
Cer 36:0;3	17.353	0	23.4412	29.1481	Cer 32:2;2
Cer 36:1;2	0	0	15.4448	9.0985	Cer 34:0;2
Cer 36:1;3	0	0	20.8702	22.3833	Cer 34:0;3
Cer 36:2;2	0	0	0	11.2854	Cer 34:1;2
Cer 38:1;2	0	0	0	12.6857	Cer 34:2;2
Cer 38:2;2	0	0	10.1633	13.8271	Cer 36:0;2
Cer 40:1;3	0	0	16.6488	23.324	Cer 36:0;3
Cer 40:2;3	0	0	14.8999	17.3478	Cer 36:1;2
Cer 44:2;2	29.5808	39.6432	0	25.742	Cer 36:1;3
DA+RC:R[37]CG 20:0+NH4	0	0	0	15.1607	Cer 36:2;2
DAG 22:0+NH4	0	0	0	16.2776	Cer 38:0;2
DAG 24:0+NH4	9.4243	0	0	12.8103	Cer 38:1;2
DAG 26:0+NH4	0	0	0	16.2616	Cer 38:1;3
DAG 26:1+NH4	26.379	0	23.7964	26.2823	Cer 38:2;3
DAG 28:2+NH4	19.0678	22.4497	12.4925	19.9837	Cer 40:0;2
DAG 28:3+NH4	0	0	0	28.573	Cer 40:1;2
DAG 30:0+NH4	0	0	0	14.5517	Cer 40:1;3
DAG 30:1+NH4	345.268	366.13	249.639	379.553	Cer 40:2;2
DAG 30:2+NH4	0	20.3991	13.2925	19.5172	Cer 40:2;3
DAG 30:3+NH4	0	0	0	14.4332	Cer 42:0;2
DAG 30:5+NH4	0	0	0	9.9868	Cer 42:1;2
DAG 32:0+NH4	0	0	17.2185	19.3266	Cer 42:2;2
DAG 32:1+NH4	39.58	0	0	0	Cer 44:0;2
DAG 32:5+NH4	0	0	0	21.6122	Cer 44:1;2
DAG 32:6+NH4	0	0	0	38.3404	Cer 44:2;2
DAG 34:0+NH4	0	0	15.6734	15.4516	Cer 46:1;2
DAG 34:4+NH4	0	0	0	30.7679	Cer 46:2;2
DAG 36:0+NH4	0	0	0	15.8383	DAG 20:0+NH4
DAG 36:5+NH4	0	0	0	26.2479	DAG 22:0+NH4
DAG 36:7+NH4	0	0	22.4436	0	DAG 24:0+NH4
DAG 38:7+NH4	0	0	0	23.2906	DAG 24:1+NH4
DAG 40:10+NH4	23.2095	27.3445	18.5423	24.3419	DAG 26:0+NH4
DAG 40:4+NH4	0	0	13.3567	0	DAG 26:1+NH4
DAG 40:6+NH4	0	0	20.5682	28.0814	DAG 28:0+NH4
DAG 40:9+NH4	856.823	878.832	1021.5	771.832	DAG 28:2+NH4
DAG 42:6+NH4	0	0	25.08	22.5649	DAG 28:3+NH4
DAG 42:7+NH4	0	0	0	21.5778	DAG 30:0+NH4
DAG 44:0+NH4	0	0	0	19.5383	DAG 30:2+NH4
DAG 44:1+NH4	0	0	0	23.1592	DAG 30:5+NH4
DAG 44:8+NH4	0	0	0	23.8363	DAG 32:0+NH4
DAG 46:0+NH4	22.669	0	22.4435	24.2859	DAG 32:4+NH4
DAG 46:1+NH4	0	0	21.5787	25.5199	DAG 32:5+NH4
DAG 46:2+NH4	0	0	0	15.6101	DAG 34:0+NH4
DAG 46:6+NH4	0	0	0	13.5124	DAG 34:4+NH4
DAG 48:0+NH4	0	0	24.865	19.8871	DAG 34:5+NH4
DAG 48:1+NH4	20.1926	24.5807	38.3003	34.1987	DAG 36:0+NH4
DAG 48:2+NH4	20.133	0	0	26.9732	DAG 36:4+NH4
HexCer 28:1;2	0	0	0	13.5189	DAG 36:5+NH4
HexCer 30:2;2	26.2551	29.7713	20.5277	28.2208	DAG 36:6+NH4
HexCer 32:1;2	37.8938	42.4342	31.1383	43.2671	DAG 38:4+NH4
HexCer 34:1;2	0	0	0	28.3111	DAG 38:5+NH4
HexCer 36:1;2	0	0	19.9039	25.2077	DAG 38:7+NH4
HexCer 42:2;2	0	0	0	7.7321	DAG 40:10+NH4
HexCer 44:0;2	0	0	0	16.2193	DAG 40:4+NH4
LPC 10:0	22.0329	14.1308	21.4428	24.5571	DAG 40:5+NH4
LPC 12:0	13.706	14.5552	8.7078	11.4108	DAG 40:6+NH4
LPC 14:0	23.941	32.3746	22.8555	34.848	DAG 40:7+NH4
LPC 14:1	52.5364	88.7112	48.2185	94.758	DAG 40:8+NH4
LPC 16:0	30.8899	36.9508	30.7078	40.8627	DAG 40:9+NH4
LPC 16:1	58.1645	72.3001	52.1226	76.4196	DAG 42:1+NH4
LPC 18:1	57.4115	44.7938	29.3445	44.4698	DAG 42:2+NH4
LPC 18:2	62.5515	75.9188	59.2903	79.9391	DAG 42:3+NH4
LPC 18:3	45.0485	50.4384	38.1546	45.8934	DAG 42:4+NH4
LPC 20:2	60.3908	66.1862	48.9125	58.2386	DAG 42:5+NH4
LPC 20:3	51.179	41.7411	44.9916	36.184	DAG 42:6+NH4
LPC 20:4	27.7541	30.9246	25.5555	26.8272	DAG 42:7+NH4
LPC 20:5	33.6959	39.1105	31.3248	34.23	DAG 42:8+NH4
LPC 22:4	34.2467	38.7321	32.5214	41.4253	DAG 42:9+NH4
LPC 22:6	45.5475	56.092	42.9597	61.3049	DAG 44:0+NH4
LPE 14:0	12.3031	18.2469	14.4333	16.0979	DAG 44:1+NH4
LPE 14:1	23.0304	25.2396	17.7446	25.133	DAG 44:3+NH4
LPE 16:0	31.7636	37.8278	28.7487	3.9509	DAG 44:4+NH4
LPE 16:1	163.19	204.845	145.708	221.762	DAG 44:5+NH4
LPE 18:0	42.8181	54.3396	33.8462	50.8301	DAG 44:7+NH4
LPE 18:1	39.3153	49.4542	35.0727	53.326	DAG 44:8+NH4
LPE 18:2	30.6867	37.7724	27.1256	39.3042	DAG 46:0+NH4
LPE 18:3	77.0653	95.3353	72.7044	99.342	DAG 46:1+NH4
LPE 20:0	15.9907	17.3215	12.2275	15.7048	DAG 46:2+NH4
LPE 20:1	58.0449	71.7193	53.699	78.6839	DAG 46:4+NH4
LPE 20:2	56.4196	66.3444	50.2719	69.224	DAG 46:6+NH4
LPE 20:3	43.0566	49.1276	50.4097	49.8245	DAG 48:0+NH4
LPE 20:4	35.5498	36.2755	34.9318	35.0807	DAG 48:1+NH4
LPE 20:5	29.4047	33.3516	24.0186	31.3156	DAG 48:2+NH4
LPE 22:1	0	26.2082	0	25.2583	DAG 48:6+NH4
LPE 22:2	52.1276	60.6107	47.4378	65.0815	HexCer 28:1;2
LPE 22:4	0	0	26.8601	23.8849	HexCer 30:2;2
LPE 22:6	93.1091	116.134	85.7999	126.138	HexCer 32:0;2
LPE 24:1	15.936	0	10.9259	0	HexCer 32:1;2
LPG 10:0	11.6368	14.4332	10.2324	15.4754	HexCer 32:2;2
LPG 12:0	18.1353	14.4346	21.2376	19.8732	HexCer 34:1;2
LPG 14:0	6.353	9.4574	24.4104	18.2705	HexCer 34:2;2
LPG 14:1	0	0	11.2932	14.8695	HexCer 36:1;2
LPG 16:0	0	0	0	24.9612	HexCer 36:2;2
LPG 16:1	11.7196	14.6398	10.8543	13.1841	HexCer 36:2;3
LPG 18:0	0	0	11.9524	12.1813	HexCer 38:0;2
LPG 18:1	0	0	0	35.1059	HexCer 38:1;2
LPG 18:2	0	0	21.6362	0	HexCer 40:0;2
LPG 20:0	0	0	0	21.5778	HexCer 40:1;2
LPG 20:5	27.6236	0	21.0926	30.6251	HexCer 42:1;2
LPG 22:0	0	0	7.3193	0	HexCer 42:2;3
LPI 10:0	0	0	0	6.626	HexCer 44:0;2
LPI 12:0	0	0	0	8.2297	HexCer 44:1;2
LPI 14:0	0	0	0	19.7684	HexCer 44:2;3
LPI 16:0	0	0	0	17.787	HexCer 46:1;2
LPI 16:1	0	0	0	7.6908	HexCer 46:2;2
LPI 20:0	0	0	0	18.1765	LPC 10:0
LPI 20:3	0	0	0	17.9582	LPC 12:0
LPI 22:2	0	0	0	28.3526	LPC 14:0
LPI 22:6	0	0	0	7.2173	LPC 14:1
LPS 14:0	16.9734	19.3018	24.8976	16.2991	LPC 16:0
LPS 16:0	29.0865	35.6704	27.7205	37.8416	LPC 16:1
LPS 18:3	0	8.146	6.4238	4.2959	LPC 18:1
LPS 20:0	0	47.8353	37.9642	52.0914	LPC 18:2
LPS 20:2	60.2955	72.4368	56.5323	78.7743	LPC 18:3
LPS 20:4	0	0	0	10.4251	LPC 20:2
LPS 22:0	35.1713	43.5091	33.0484	45.8037	LPC 20:3
LPS 22:1	37.6318	66.4925	43.7586	60.1279	LPC 20:4
LPS 22:4	29.3585	32.851	30.3278	28.571	LPC 20:5
LPS 22:6	0	0	0	37.8315	LPC 22:2
LPS 24:0	40.3867	48.9986	36.7953	52.3605	LPC 22:4
LPS 24:1	64.2013	78.9986	60.0797	82.9173	LPC 22:6
MAG 12:0+NH4	0	0	4.6162	4.0467	LPE 10:0
MAG 14:0+NH4	0	0	0	3.3939	LPE 12:0
MAG 16:1+NH4	0	0	0	7.4885	LPE 14:0
MAG 18:1+NH4	0	0	0	6.0682	LPE 14:1
MAG 18:3+NH4	0	0	0	3.3386	LPE 16:0
MAG 20:5+NH4	0	0	0	18.4802	LPE 16:1
MAG 22:0+NH4	0	0	0	15.9215	LPE 18:0
MAG 22:2+NH4	0	0	0	16.8258	LPE 18:1
MAG 22:4+NH4	182.147	186.567	127.074	189.408	LPE 18:2
MAG 24:0+NH4	0	0	0	5.9885	LPE 18:3
MAG 26:0+NH4	0	0	0	7.3146	LPE 20:0
PC 26:1	0	0	0	19.2609	LPE 20:1
PC 28:2	45.4852	49.133	32.7749	48.5471	LPE 20:2
PC 28:3	0	0	0	3.4283	LPE 20:3
PC 30:0	28.9317	31.8527	37.2392	30.846	LPE 20:4
PC 30:1	0	0	0	5.5671	LPE 20:5
PC 30:2	47.1817	52.4798	32.7519	54.6109	LPE 22:0
PC 30:5	61.6994	73.4818	54.4046	77.4244	LPE 22:1
PC 32:0	0	0	46.1194	39.9182	LPE 22:2
PC 32:1	280.495	301.834	247.314	306.989	LPE 22:4
PC 32:2	0	32.9127	0	31.7696	LPE 22:6
PC 32:5	47.6373	54.012	61.096	65.7657	LPE 24:0
PC 32:6	22.2432	24.7081	20.2602	24.3511	LPE 24:1
PC 34:1	221.303	231.639	309.23	234.538	LPE 26:0
PC 34:2	55.4702	63.48	67.2466	53.3042	LPG 10:0
PC 34:3	0	0	0	23.4627	LPG 12:0
PC 34:5	0	0	0	11.2507	LPG 14:0
PC 34:6	18.0608	20.0051	19.5317	18.7139	LPG 14:1
PC 36:1	48.0897	48.2201	44.0564	56.7	LPG 16:0
PC 36:2	120.045	125.017	164.362	127.009	LPG 16:1
PC 36:3	19.9037	21.7761	26.0041	23.009	LPG 18:0
PC 36:4	20.4636	19.8533	17.053	17.3024	LPG 18:1
PC 36:5	0	0	0	15.4424	LPG 18:2
PC 38:2	15.0695	15.8499	0	16.2312	LPG 18:3
PC 38:4	0	0	0	19.3744	LPG 20:0
PC 38:5	0	0	21.0374	18.1647	LPG 20:1
PC 40:6	24.1773	27.2316	22.6518	25.4598	LPG 20:2
PC 42:5	66.6712	71.047	54.4869	74.376	LPG 20:3
PC 44:5	0	0	0	11.3106	LPG 20:4
PE 20:0	67.5225	84.8798	62.0386	92.3939	LPG 20:5
PE 22:0	29.6429	36.6044	28.5907	39.3131	LPG 22:0
PE 24:0	40.7405	0	0	0	LPG 22:1
PE 24:1	0	54.5206	0	0	LPG 22:2
PE 28:1	25.2507	27.4914	19.7771	26.6195	LPG 22:4
PE 30:1	30.9831	32.8657	33.9394	31.4111	LPG 22:6
PE 30:3	43.5358	48.5405	34.8656	40.9756	LPG 24:0
PE 30:4	27.699	0	28.8544	38.8028	LPG 24:1
PE 30:5	46.758	55.1026	42.1467	48.3287	LPI 10:0
PE 32:0	0	0	18.901	21.2312	LPI 12:0
PE 32:2	285.407	306.227	212.923	318.114	LPI 14:0
PE 32:4	0	0	0	5.8506	LPI 14:1
PE 32:5	41.9234	48.9474	39.3015	49.4646	LPI 16:0
PE 32:6	24.689	34.9011	27.7582	73.4256	LPI 16:1
PE 34:0	52.6033	48.892	50.4844	62.5401	LPI 18:0
PE 34:1	0	42.4991	50.6149	0	LPI 18:1
PE 34:2	0	0	0	2.9622	LPI 18:2
PE 34:4	0	0	10.2156	16.07	LPI 20:0
PE 34:6	62.0001	69.3708	63.2759	63.4983	LPI 20:1
PE 36:0	0	0	22.5067	28.2978	LPI 20:3
PE 36:1	152.725	156.043	152.999	180.276	LPI 20:5
PE 36:2	58.4992	59.7686	65.0522	61.5363	LPI 22:0
PE 36:3	0	0	0	18.7651	LPI 22:1
PE 38:0	158.145	162.427	122.433	175.323	LPI 22:2
PE 38:1	32.4191	33.4566	40.3615	50.3139	LPI 22:4
PE 38:2	48.4064	48.724	48.4341	54.8366	LPI 24:1
PE 38:3	28.7778	27.3462	25.9935	27.396	LPS 10:0
PE 38:4	0	0	24.9322	21.9535	LPS 12:0
PE 38:5	30.7339	33.3511	31.3991	31.3604	LPS 14:0
PE 38:6	0	0	0	11.8116	LPS 16:0
PE 40:2	0	0	0	24.4425	LPS 20:0
PE 40:4	0	0	0	13.8712	LPS 20:2
PE 40:5	23.3427	0	24.456	23.7437	LPS 20:5
PE 44:3	0	0	0	10.3566	LPS 22:0
PG 20:0	19.8858	0	0	13.984	LPS 22:1
PG 28:2	544.692	577.719	663.923	516.971	LPS 22:4
PG 30:5	0	0	25.3282	0	LPS 24:0
PG 34:2	0	0	0	10.0483	LPS 24:1
PG 36:5	0	0	26.2544	0	LPS 26:0
PG 38:1	0	0	0	15.3186	MAG 10:0+NH4
PG 44:6	0	0	0	16.5416	MAG 12:0+NH4
PI 20:0	0	0	17.0664	20.4185	MAG 14:0+NH4
PS 22:0	49.4645	58.6002	46.2301	64.2935	MAG 14:1+NH4
PS 24:0	51.4174	76.3218	56.5337	73.4387	MAG 16:0+NH4
PS 24:1	48.5067	61.2049	44.6828	61.0353	MAG 16:1+NH4
PS 26:0	46.2275	48.8774	42.4797	55.1042	MAG 18:0+NH4
PS 26:1	0	57.816	45.3546	57.3163	MAG 18:1+NH4
PS 28:1	43.4538	48.4737	44.0726	47.946	MAG 18:2+NH4
PS 28:2	0	0	26.6902	34.5935	MAG 18:3+NH4
PS 28:3	36.8905	42.9248	37.6239	39.5018	MAG 20:0+NH4
PS 30:1	38.8824	0	0	0	MAG 20:1+NH4
PS 30:2	31.7	37.2864	30.991	36.3383	MAG 20:2+NH4
PS 30:3	28.6213	32.3108	22.5623	28.3015	MAG 20:3+NH4
PS 30:4	29.7564	34.3713	27.6651	37.4103	MAG 20:4+NH4
PS 30:5	45.3441	54.5384	41.5447	58.1776	MAG 20:5+NH4
PS 32:0	0	0	0	15.6697	MAG 22:0+NH4
PS 32:4	39.1056	46.315	33.9055	45.6653	MAG 22:1+NH4
PS 32:5	40.4863	46.2354	32.1804	44.8034	MAG 22:2+NH4
PS 34:1	0	0	13.1836	11.197	MAG 22:4+NH4
PS 34:4	37.3086	43.6326	30.7035	40.8651	MAG 24:0+NH4
PS 34:5	42.2066	49.5613	34.6955	47.7833	MAG 24:1+NH4
PS 34:6	43.3523	46.5793	41.1506	45.4579	MAG 26:0+NH4
PS 36:0	0	0	21.1874	0	PC 24:0
PS 36:1	35.9989	50.6921	46.2493	0	PC 24:1
PS 36:2	0	0	8.5977	10.2007	PC 26:1
PS 36:4	0	0	0	6.6241	PC 28:1
PS 36:5	33.864	38.9902	27.4786	37.167	PC 28:2
PS 36:6	37.3137	40.1582	37.8831	38.4732	PC 30:0
PS 38:0	106.593	112.975	84.5194	114.992	PC 30:1
PS 38:1	0	0	18.7243	21.3502	PC 30:2
PS 38:6	0	0	23.4381	30.1838	PC 30:5
PS 40:0	0	0	0	18.9986	PC 32:0
PS 40:5	0	0	0	11.0331	PC 32:1
PS 44:1	0	0	0	17.8216	PC 32:2
PS 48:4	25.6538	26.8089	21.2117	27.4323	PC 32:3
SM 28:1;2	0	0	0	8.9217	PC 32:4
SM 30:1;2	33.8784	0	10.5729	0	PC 32:5
SM 32:1;2	0	0	0	8.8196	PC 32:6
SM 34:1;2	48.1973	53.495	0	51.3649	PC 34:0
SM 34:2;2	0	0	17.982	0	PC 34:1
SM 34:2;3	22.0945	22.9974	19.9581	22.7906	PC 34:2
SM 36:1;2	0	0	16.5779	0	PC 34:3
SM 40:1;2	0	0	0	13.2099	PC 34:4
SM 40:2;2	0	0	0	10.289	PC 34:5
SM 42:1;2	0	0	0	13.8887	PC 34:6
SM 42:2;2	40.275	40.5925	37.6507	54.8719	PC 36:0
TAG 30:0+NH4	0	0	18.6418	36.0981	PC 36:1
TAG 32:0+NH4	345.376	371.492	268.758	407.487	PC 36:2
TAG 34:0+NH4	0	0	12.8195	16.353	PC 36:3
TAG 34:1+NH4	20.6453	24.6297	33.296	34.0892	PC 36:4
TAG 36:1+NH4	0	0	16.0963	26.3598	PC 36:5
TAG 38:2+NH4	0	0	0	16.4045	PC 38:1
TAG 42:0+NH4	0	0	0	15.839	PC 38:2
TAG 42:4+NH4	0	0	12.4668	15.3386	PC 38:3
TAG 44:0+NH4	0	0	0	21.1161	PC 38:4
TAG 44:1+NH4	0	0	0	21.3496	PC 38:5
TAG 44:2+NH4	0	0	0	15.6334	PC 40:1
TAG 44:4+NH4	0	0	0	9.3459	PC 40:2
TAG 46:0+NH4	22.5452	0	23.4915	26.0671	PC 40:4
TAG 46:1+NH4	23.9821	25.7266	27.9242	34.1179	PC 40:5
TAG 46:2+NH4	0	0	17.6719	23.924	PC 40:6
TAG 48:0+NH4	0	0	27.4672	18.2865	PC 42:5
TAG 48:1+NH4	27.3224	26.5458	39.9106	38.8855	PC 42:6
TAG 48:2+NH4	25.3872	23.4105	32.97	35.3391	PC 44:5
TAG 48:3+NH4	0	0	15.1046	18.8261	PC 44:6
TAG 50:1+NH4	0	24.2342	0	29.2525	PC 46:0
TAG 50:2+NH4	34.6864	35.1213	0	45.3072	PC 48:2
TAG 50:3+NH4	0	0	20.8272	22.5104	PC 48:4
TAG 52:1+NH4	0	0	30.2504	0	PE 20:0
TAG 52:2+NH4	0	32.7719	88.8333	31.5523	PE 22:0
TAG 52:3+NH4	18.7982	22.0569	33.2909	24.7592	PE 24:1
TAG 52:4+NH4	0	0	0	14.2669	PE 26:0
TAG 54:2+NH4	0	0	29.5338	0	PE 26:1
TAG 54:3+NH4	0	0	53.6742	15.5788	PE 28:1
TAG 54:4+NH4	0	0	14.5206	13.2924	PE 28:2
TAG 56:3+NH4	0	0	15.2079	0	PE 28:3
TAG 58:8+NH4	0	0	0	12.855	PE 30:0
					PE 30:3
					PE 30:5
					PE 32:0
					PE 32:2
					PE 32:4
					PE 32:5
					PE 32:6
					PE 34:0
					PE 34:1
					PE 34:2
					PE 34:6
					PE 36:0
					PE 36:1
					PE 36:2
					PE 36:4
					PE 36:5
					PE 36:6
					PE 38:0
					PE 38:1
					PE 38:2
					PE 38:3
					PE 38:4
					PE 38:5
					PE 38:6
					PE 40:1
					PE 40:2
					PE 40:3
					PE 40:4
					PE 40:5
					PE 42:1
					PE 42:2
					PE 42:4
					PE 44:1
					PE 44:2
					PE 44:3
					PE 44:5
					PE 46:0
					PE 46:1
					PE 48:0
					PE 48:1
					PG 20:0
					PG 22:0
					PG 24:0
					PG 24:1
					PG 26:0
					PG 26:1
					PG 28:2
					PG 28:3
					PG 30:1
					PG 30:2
					PG 30:3
					PG 30:4
					PG 30:5
					PG 32:0
					PG 32:1
					PG 32:2
					PG 32:5
					PG 32:6
					PG 34:0
					PG 34:1
					PG 34:5
					PG 34:6
					PG 36:3
					PG 36:6
					PG 38:2
					PG 38:3
					PG 38:4
					PG 38:5
					PG 40:1
					PG 40:2
					PG 40:5
					PG 42:1
					PG 42:2
					PG 42:3
					PG 42:4
					PG 42:5
					PG 44:4
					PG 44:5
					PG 46:0
					PG 46:3
					PG 46:4
					PG 46:6
					PG 48:0
					PG 48:2
					PG 48:4
					PI 20:0
					PI 22:0
					PI 24:0
					PI 24:1
					PI 26:0
					PI 26:1
					PI 28:0
					PI 28:1
					PI 28:2
					PI 28:3
					PI 30:1
					PI 30:2
					PI 30:3
					PI 30:4
					PI 30:5
					PI 32:2
					PI 32:3
					PI 32:4
					PI 32:5
					PI 32:6
					PI 34:0
					PI 34:1
					PI 34:3
					PI 34:4
					PI 34:5
					PI 34:6
					PI 36:2
					PI 36:3
					PI 36:4
					PI 36:5
					PI 36:6
					PI 38:1
					PI 38:2
					PI 38:4
					PI 38:5
					PI 38:6
					PI 40:1
					PI 40:2
					PI 40:3
					PI 40:6
					PI 42:1
					PI 42:3
					PI 42:4
					PI 42:5
					PI 44:2
					PI 44:5
					PI 46:1
					PI 46:3
					PI 46:4
					PI 46:6
					PI 48:0
					PI 48:2
					PI 48:6
					PS 22:0
					PS 24:0
					PS 24:1
					PS 26:0
					PS 26:1
					PS 28:1
					PS 28:2
					PS 28:3
					PS 30:1
					PS 30:2
					PS 30:3
					PS 30:4
					PS 30:5
					PS 32:2
					PS 32:4
					PS 32:5
					PS 32:6
					PS 34:2
					PS 34:4
					PS 34:5
					PS 34:6
					PS 36:0
					PS 36:1
					PS 36:5
					PS 36:6
					PS 38:0
					PS 38:1
					PS 38:2
					PS 38:3
					PS 38:4
					PS 40:0
					PS 40:2
					PS 40:4
					PS 40:5
					PS 40:6
					PS 42:4
					PS 44:1
					PS 44:2
					PS 44:3
					PS 44:4
					PS 44:5
					PS 46:0
					PS 46:3
					PS 46:4
					PS 46:5
					PS 48:2
					PS 48:4
					SM 28:1;2
					SM 30:0;2
					SM 32:0;2
					SM 32:0;3
					SM 32:1;2
					SM 34:0;2
					SM 34:1;2
					SM 34:1;3
					SM 34:2;2
					SM 36:0;2
					SM 36:0;3
					SM 36:1;2
					SM 36:1;3
					SM 36:2;2
					SM 36:2;3
					SM 38:1;2
					SM 38:2;2
					SM 38:2;3
					SM 40:0;3
					SM 40:1;3
					SM 40:2;2
					SM 40:2;3
					SM 42:0;2
					SM 42:1;2
					SM 42:1;3
					SM 42:2;2
					SM 42:2;3
					SM 44:0;2
					SM 44:0;3
					SM 44:1;2
					SM 44:1;3
					SM 44:2;2
					SM 44:2;3
					SM 46:0;2
					SM 46:1;2
					SM 46:2;2
					TAG 30:0+NH4
					TAG 32:0+NH4
					TAG 34:0+NH4
					TAG 34:1+NH4
					TAG 36:1+NH4
					TAG 38:3+NH4
					TAG 40:2+NH4
					TAG 40:3+NH4
					TAG 40:4+NH4
					TAG 42:4+NH4
					TAG 44:0+NH4
					TAG 44:1+NH4
					TAG 44:2+NH4
					TAG 44:4+NH4
					TAG 46:0+NH4
					TAG 46:1+NH4
					TAG 46:2+NH4
					TAG 46:4+NH4
					TAG 48:0+NH4
					TAG 48:1+NH4
					TAG 48:2+NH4
					TAG 48:3+NH4
					TAG 48:5+NH4
					TAG 50:2+NH4
					TAG 50:3+NH4
					TAG 52:0+NH4
					TAG 52:1+NH4
					TAG 52:2+NH4
					TAG 52:3+NH4
					TAG 52:4+NH4
					TAG 52:5+NH4
					TAG 54:1+NH4
					TAG 54:2+NH4
					TAG 54:3+NH4
					TAG 54:4+NH4
					TAG 54:5+NH4
					TAG 54:6+NH4
					TAG 54:7+NH4
					TAG 56:0+NH4
					TAG 56:1+NH4
					TAG 56:2+NH4
					TAG 56:4+NH4
					TAG 56:5+NH4
					TAG 56:6+NH4
					TAG 56:7+NH4
					TAG 56:8+NH4
					TAG 56:9+NH4
					TAG 58:1+NH4
					TAG 58:11+NH4
					TAG 58:2+NH4
					TAG 58:6+NH4
					TAG 58:8+NH4
					TAG 60:0+NH4
					TAG 60:1+NH4
					TAG 60:10+NH4
					TAG 60:11+NH4
					TAG 60:12+NH4
					TAG 60:2+NH4
					TAG 60:4+NH4
					TAG 60:5+NH4
					TAG 60:7+NH4
					TAG 60:8+NH4
					TAG 60:9+NH4
					TAG 62:0+NH4
					TAG 62:10+NH4
					TAG 62:6+NH4
					TAG 62:7+NH4
					TAG 62:8+NH4
					TAG 62:9+NH4
					TAG 64:0+NH4
					TAG 64:1+NH4
					TAG 64:11+NH4
					TAG 64:12+NH4
					TAG 64:4+NH4
					TAG 64:8+NH4
					TAG 64:9+NH4
					TAG 66:10+NH4
					TAG 66:11+NH4
					TAG 66:12+NH4
					TAG 66:4+NH4
					TAG 66:6+NH4
					TAG 66:7+NH4
					TAG 66:8+NH4
					TAG 66:9+NH4
					TAG 68:1+NH4
					TAG 68:10+NH4
					TAG 68:11+NH4
					TAG 68:12+NH4
					TAG 68:5+NH4
					TAG 68:6+NH4
					TAG 68:7+NH4
					TAG 68:8+NH4
					TAG 68:9+NH4
					TAG 70:10+NH4
					TAG 70:12+NH4
					TAG 70:5+NH4
					TAG 70:6+NH4
					TAG 70:7+NH4
					TAG 70:8+NH4
					TAG 72:1+NH4

## Sheet: Supplementary Table3
Table S3: Peak areas of the lipid species identified by LipidView for lipidomics analysis of MEFs cells in nano flow LCMSMS
Nano_MEF
Nano_Lipid Species Peak Area	MEF_sample1	MEF_sample1r	MEF_sample2	MEF_sample2r
CE 14:1+NH4	49.8144	48.3517	39.5675	40.5035
CE 16:1+NH4	84.0225	77.8402	81.9383	82.9862
CE 18:0+NH4	13.3449	13.0253	16.7936	17.5822
CE 18:1+NH4	52.6136	51.8367	52.4981	55.0469
CE 18:2+NH4	22.433	22.9514	24.0254	24.4697
CE 18:3+NH4	6.4745	6.7836	5.2091	5.4019
CE 20:0+NH4	18.0604	0	9.0244	9.94
CE 20:1+NH4	19.8562	19.6336	0	19.7174
CE 20:2+NH4	13.4633	12.9102	0	0
CE 20:3+NH4	9.2732	9.1621	7.7747	7.9141
CE 20:4+NH4	0	0	0.7125	0
CE 22:6+NH4	23.2753	0	18.7835	19.2015
Cer 28:1;2	15.9898	13.1184	0	0
Cer 30:0;2	23.3822	20.5151	20.2221	20.9378
Cer 30:1;2	48.2659	43.1692	40.8138	41.8764
Cer 30:2;2	5.4618	23.1948	5.4228	5.5456
Cer 32:0;2	34.7198	33.862	32.23	32.8307
Cer 32:0;3	19.7674	17.1455	14.6738	15.1159
Cer 32:1;2	115.006	102.684	108.746	111.841
Cer 32:1;3	3.5544	0	2.6158	2.722
Cer 32:2;2	26.5964	24.538	23.9669	24.503
Cer 34:0;2	35.9282	35.1639	37.6518	38.3876
Cer 34:0;3	21.3703	21.3235	16.6935	18.019
Cer 34:1;2	121.824	113.447	123.265	126.537
Cer 34:1;3	0	12.1869	0	0
Cer 34:2;2	70.5506	63.8007	69.0187	71.1261
Cer 36:0;2	30.8562	43.8968	33.4757	34.2059
Cer 36:0;3	46.9448	44.6633	32.8917	33.5236
Cer 36:1;2	119.297	117.035	122.131	124.91
Cer 36:1;3	29.2759	27.1829	21.5191	23.4257
Cer 36:2;2	94.1751	91.7186	92.8648	96.5486
Cer 36:2;3	8.5834	9.3023	0	6.2431
Cer 38:0;2	20.2432	20.7607	24.3909	24.8194
Cer 38:1;2	76.5692	75.2322	84.1575	86.5362
Cer 38:1;3	31.6978	30.3891	23.6065	23.7562
Cer 38:2;2	62.1775	61.9065	65.1276	66.3369
Cer 38:2;3	11.4801	8.0218	5.9945	7.993
Cer 40:0;2	11.7718	13.3119	14.5306	14.9392
Cer 40:1;2	42.8329	43.5129	50.3285	51.5715
Cer 40:1;3	31.0507	32.0613	36.0892	36.8179
Cer 40:2;2	38.4187	36.9455	41.5197	41.8665
Cer 40:2;3	6.9323	9.1986	5.2794	8.7923
Cer 42:0;2	0	2.9333	18.7894	0
Cer 42:1;2	13.2819	12.4206	19.8198	20.1888
Cer 42:2;2	15.4026	16.6457	18.6712	18.5813
Cer 44:0;2	2.1071	0.4539	0	0
Cer 44:1;2	12.7936	0	12.0809	12.5421
Cer 46:1;2	4.8475	6.0408	0	0
Cer 46:2;2	3.6568	3.218	5.0163	5.3732
CerP 28:1;2	3.6725	3.6758	0	0
CerP 30:0;2	2.1709	1.9855	3.044	2.9405
CerP 30:2;2	6.1272	5.5084	6.2638	5.9904
CerP 32:0;2	2.5013	0.837	1.9216	2.0807
CerP 32:1;2	9.6531	11.9678	10.2168	10.0779
CerP 32:2;2	10.8411	0	0	0
CerP 34:0;2	3.9319	3.1561	0	4.9237
CerP 36:0;2	1.8849	1.6335	0.8508	0
CerP 40:0;2	0	10.2778	0	0
CerP 42:0;2	0	9.2705	7.5679	7.7048
CerP 44:0;2	4.4592	4.0345	3.5674	3.0626
CerP 46:0;2	5.8618	1.2864	5.0514	5.9135
DAG 20:0+NH4	5.1702	6.1641	2.7555	2.7128
DAG 22:0+NH4	6.0828	5.5174	3.7681	3.8443
DAG 24:0+NH4	4.4378	4.8045	4.8425	4.8836
DAG 24:1+NH4	13.0024	11.8308	9.8587	9.9009
DAG 26:0+NH4	8.8087	5.6979	4.3016	6.0737
DAG 26:1+NH4	14.0828	9.9522	9.511	9.7071
DAG 28:0+NH4	20.9253	18.9179	13.8642	14.1949
DAG 28:2+NH4	11.4919	11.7448	9.4581	8.3995
DAG 28:3+NH4	7.9057	7.5696	3.7458	4.6125
DAG 30:0+NH4	39.9733	36.6158	29.2641	30.4214
DAG 30:5+NH4	5.5674	4.9013	1.8665	3.3041
DAG 32:0+NH4	41.7265	39.1185	29.575	30.4016
DAG 32:4+NH4	6.632	5.9325	0	0
DAG 32:5+NH4	3.7704	2.5976	0.4523	0
DAG 32:6+NH4	3.4665	3.3652	0	0
DAG 34:4+NH4	6.7561	4.8474	4.7376	5.1045
DAG 34:5+NH4	11.2424	3.9528	11.5347	12.27
DAG 36:0+NH4	32.8288	31.4997	32.8836	33.8334
DAG 36:4+NH4	2.4542	3.9224	2.3775	3.0611
DAG 36:5+NH4	4.473	6.7642	10.9144	9.9128
DAG 36:6+NH4	5.084	3.047	3.4786	3.7615
DAG 36:7+NH4	0	0	6.8665	7.6363
DAG 38:4+NH4	5.854	6.5788	5.0675	4.8052
DAG 38:5+NH4	13.5513	14.1209	5.7939	11.8488
DAG 38:6+NH4	15.6061	18.2261	17.7118	18.4302
DAG 38:7+NH4	8.1784	7.9611	0	0
DAG 40:0+NH4	0	8.9698	0	0
DAG 40:4+NH4	4.5703	5.809	3.6972	3.8044
DAG 40:5+NH4	0	0	9.545	9.4605
DAG 40:6+NH4	19.1757	18.9098	11.3976	11.5731
DAG 40:7+NH4	28.0431	27.8769	6.2605	6.5113
DAG 40:8+NH4	7.4991	3.2761	0	0
DAG 42:0+NH4	0	0	22.6973	23.5699
DAG 42:1+NH4	25.3232	0	18.6551	22.5889
DAG 42:3+NH4	0	0	7.725	7.3498
DAG 42:4+NH4	0	0	7.0225	7.5987
DAG 42:7+NH4	27.6433	29.1591	6.4643	6.8326
DAG 42:8+NH4	20.6819	23.3074	0	0
DAG 42:9+NH4	8.3364	0	1.2396	1.307
DAG 44:0+NH4	26.5804	27.8717	31.4606	32.6126
DAG 44:1+NH4	28.1745	26.307	31.4586	26.7487
DAG 44:2+NH4	18.9588	0	0	0
DAG 44:4+NH4	0	0	5.1532	0
DAG 46:0+NH4	39.2446	44.6701	56.2505	57.3446
DAG 46:1+NH4	46.3948	52.208	56.0671	57.3474
DAG 46:2+NH4	29.8767	28.9534	0	0
DAG 46:3+NH4	0	8.7206	9.7159	9.8226
DAG 46:4+NH4	6.2864	5.1267	6.1368	6.5749
DAG 46:5+NH4	3.0109	2.1744	3.1893	3.2054
DAG 46:6+NH4	2.9294	0	3.9396	3.9197
DAG 48:0+NH4	52.5465	61.6181	75.5608	76.6555
DAG 48:1+NH4	84.5189	95.553	110.797	112.353
DAG 48:2+NH4	60.5035	65.9489	69.5693	70.5917
DAG 48:6+NH4	4.3362	4.134	4.738	4.6786
Hex2Cer 30:2;2	7.6273	10.424	9.53	9.9627
Hex2Cer 32:0;3	4.7201	5.2797	0	0
Hex2Cer 32:2;2	0	5.0819	3.9674	4.4223
Hex2Cer 34:0;3	2.5069	4.066	4.2741	5.199
Hex2Cer 34:1;3	7.7348	6.454	10.0617	10.1716
Hex2Cer 34:2;2	6.0347	3.2224	0	0
Hex2Cer 36:0;3	29.816	32.4639	53.0876	55.162
Hex2Cer 36:1;3	0	3.7172	0.0397	4.4965
Hex2Cer 36:2;2	5.4357	0	0	0
Hex2Cer 36:2;3	0	1.9051	0	0
Hex2Cer 38:0;2	0	0	2.1143	2.3924
Hex2Cer 38:0;3	1.9743	3.2582	3.9073	3.5327
Hex2Cer 38:1;3	5.5398	4.2555	17.2522	17.8156
Hex2Cer 38:2;2	3.7231	3.8964	0	0
Hex2Cer 38:2;3	0	1.0728	2.6565	0
Hex2Cer 40:0;3	9.1084	5.3578	0	0
Hex2Cer 40:1;3	0	8.667	0	0
Hex2Cer 40:2;2	0	0	3.4369	3.3432
Hex2Cer 42:0;2	3.8692	8.2729	2.8284	0
Hex2Cer 42:0;3	0	0	0	1.5105
Hex2Cer 42:1;2	4.1084	0	0	0
Hex2Cer 42:1;3	0	0	8.1849	7.3762
Hex2Cer 42:2;2	4.6514	0	2.4975	2.5636
Hex2Cer 42:2;3	7.8453	5.8814	0	3.3949
Hex2Cer 44:0;3	0	0	1.4396	0
Hex2Cer 44:1;2	4.4932	4.4139	0	0
Hex2Cer 44:2;2	2.1259	4.39	3.9558	3.609
Hex2Cer 44:2;3	0	8.021	0	0
Hex2Cer 46:2;2	0	3.0885	0	0
Hex3Cer 28:0;2	1.6543	2.2517	1.7107	2.0475
Hex3Cer 28:1;2	1.9737	1.1742	2.9861	2.8225
Hex3Cer 30:0;2	3.6984	4.0522	5.7098	5.6223
Hex3Cer 30:1;2	2.1382	0.4509	3.4626	1.2422
Hex3Cer 30:2;2	4.2484	0	9.7273	9.565
Hex3Cer 32:0;3	3.1744	1.9939	7.6874	7.1126
Hex3Cer 32:1;3	1.2738	2.8337	3.0609	3.5756
Hex3Cer 32:2;2	0	1.4641	0	0
Hex3Cer 34:0;2	0	0	4.7269	4.1778
Hex3Cer 34:1;2	0	1.8383	2.6005	2.5298
Hex3Cer 34:2;2	2.2577	0	3.2417	1.2129
Hex3Cer 34:2;3	1.9941	0	3.4644	3.605
Hex3Cer 36:0;2	0	1.9339	0	0
Hex3Cer 36:0;3	0	1.8131	0	0
Hex3Cer 36:1;3	1.8134	0	0.9246	0
Hex3Cer 36:2;2	3.2761	2.7704	0	0
Hex3Cer 36:2;3	2.3138	2.3328	0	0
Hex3Cer 38:0;2	0	3.3519	0	0
Hex3Cer 38:0;3	0	1.2888	3.0901	2.8387
Hex3Cer 38:1;2	2.9737	0	0	0
Hex3Cer 38:1;3	2.4554	0	0.4129	0
Hex3Cer 38:2;2	2.1235	2.5331	0	0
Hex3Cer 38:2;3	4.0511	3.2492	0	0
Hex3Cer 40:0;3	1.0161	1.3891	1.7398	2.0259
Hex3Cer 40:1;2	4.0956	0	0	0
Hex3Cer 40:1;3	2.7746	0	0	0
Hex3Cer 40:2;3	3.4483	3.457	0	0
Hex3Cer 42:0;2	0	1.1831	0	0
Hex3Cer 42:0;3	0	1.8311	0.4488	0.1776
Hex3Cer 42:1;2	0	2.4933	0	0
Hex3Cer 42:1;3	2.1108	3.235	0.8885	0
Hex3Cer 42:2;2	0	0	0	3.3416
Hex3Cer 42:2;3	0	3.4053	0	0
Hex3Cer 44:0;2	0	2.5257	1.4052	2.0193
Hex3Cer 46:0;2	0	0	1.2338	0
Hex3Cer 46:2;2	0.0112	0.3765	1.4992	1.257
HexCer 28:0;2	10.4066	0.3217	8.8543	0
HexCer 28:1;2	7.5385	5.2578	2.9638	3.1771
HexCer 30:0;2	3.1674	0	5.6184	3.9886
HexCer 30:2;2	4.595	9.4498	10.2782	10.5543
HexCer 32:0;2	8.8023	9.2344	3.9564	3.7683
HexCer 32:1;2	0	30.5987	0	0
HexCer 32:2;2	14.5583	16.3227	7.3872	7.1335
HexCer 34:1;2	25.8911	28.5846	22.4347	22.9562
HexCer 34:1;3	9.3237	0	0	0
HexCer 36:1;2	27.6584	27.7001	23.2852	23.9282
HexCer 36:2;3	22.2233	20.4778	20.6899	21.3084
HexCer 38:0;2	5.8147	5.3366	3.8564	0
HexCer 38:1;2	17.0475	21.5493	18.8859	19.3635
HexCer 40:0;2	0	2.2191	5.8693	0
HexCer 40:1;2	9.3908	11.3293	8.473	8.6627
HexCer 40:2;3	0	6.3735	6.6461	6.9432
HexCer 42:1;2	0	14.5755	8.0102	8.1422
HexCer 42:2;3	0	7.0321	4.136	4.3796
HexCer 44:1;2	16.1824	13.7716	12.1287	12.4039
HexCer 44:2;3	12.1424	0	15.9638	15.8724
HexCer 46:0;2	14.6736	15.716	14.675	14.3942
HexCer 46:1;2	20.3777	20.1083	19.8532	18.0932
LPC 10:0	2.1345	1.9513	2.5792	2.4959
LPC 12:0	2.4181	1.6829	2.1805	2.1756
LPC 14:0	3.9012	2.2961	4.5914	4.5448
LPC 14:1	3.0905	3.3431	8.3842	8.0369
LPC 16:0	8.0696	5.7017	6.4583	6.3921
LPC 16:1	7.9108	5.9956	9.6624	9.5186
LPC 18:1	13.8854	9.9388	11.3634	11.5763
LPC 18:2	11.2881	9.648	17.7812	17.2954
LPC 18:3	6.2885	4.1777	7.2819	7.4145
LPC 20:2	5.9981	6.0668	0	7.4651
LPC 20:3	11.8622	2.9164	9.4601	10.0593
LPC 20:4	3.9891	3.8641	3.3876	4.5081
LPC 20:5	3.696	3.6958	4.1845	0
LPC 22:2	5.5891	5.8754	8.1313	8.1204
LPC 22:4	8.665	7.2236	4.3732	4.3781
LPC 22:6	4.8089	4.9452	7.5747	6.2497
LPE 10:0	0	2.0831	0.5135	0.4981
LPE 12:0	1.5845	1.5057	2.0098	2.1061
LPE 14:0	3.0421	2.4889	2.8043	2.8048
LPE 14:1	4.0669	3.0755	6.1699	5.8545
LPE 16:1	11.0381	9.7935	13.6004	13.3149
LPE 18:0	10.8837	7.2943	3.5461	5.3919
LPE 18:1	7.1986	5.8259	6.7826	6.346
LPE 18:2	4.1005	4.191	4.7702	4.4108
LPE 18:3	11.2853	9.6473	19.427	18.7603
LPE 20:1	12.9114	3.7185	7.026	4.6887
LPE 20:2	4.2399	3.9746	6.3623	6.1068
LPE 20:3	6.2951	5.8266	6.3817	6.4957
LPE 20:4	9.9228	5.571	5.6857	5.8226
LPE 20:5	2.5284	2.4546	3.42	3.3408
LPE 22:2	5.6533	5.3875	7.1882	7.0044
LPE 22:4	3.2352	2.1607	3.5154	3.0038
LPE 22:6	6.2164	5.6902	7.8687	8.5914
LPE 24:0	3.2758	3.5125	0	0
LPE 24:1	11.0794	9.5888	17.7252	17.0786
LPG 10:0	3.9841	1.2646	3.7252	3.6897
LPG 12:0	5.2639	2.8821	3.9869	4.2597
LPG 14:0	3.1005	1.9748	0	0
LPG 14:1	2.8156	2.1451	4.1122	4.1791
LPG 16:0	6.5159	3.1541	3.5042	3.7249
LPG 16:1	1.6628	0	2.5766	0
LPG 18:0	3.3919	2.6006	1.5801	1.9845
LPG 18:1	3.7638	1.8251	2.9992	3.0203
LPG 18:2	3.1832	2.8883	3.2547	3.7643
LPG 18:3	1.7564	1.4246	1.6649	2.0117
LPG 20:0	1.3514	4.7418	2.5315	2.4034
LPG 20:1	2.5051	2.1733	2.5095	2.0114
LPG 20:2	2.6784	2.3104	5.3026	5.2915
LPG 20:3	2.6308	2.2389	3.128	3.2219
LPG 20:4	2.1266	2.4153	2.5185	2.2835
LPG 20:5	4.4065	2.4105	3.8395	3.9733
LPG 22:0	3.468	0	3.3205	3.6096
LPG 22:1	3.218	0	3.0368	3.0192
LPG 22:2	1.9337	1.7049	1.5595	1.6808
LPG 22:4	3.0504	2.6664	3.535	3.3442
LPG 22:6	0	1.6356	2.461	2.4115
LPG 24:0	1.4033	1.2519	1.1629	1.3153
LPG 24:1	0	1.7501	3.2058	1.9069
LPI 10:0	2.3417	1.6102	2.7141	1.6118
LPI 12:0	1.8005	1.2288	1.2455	1.2274
LPI 14:0	1.5257	1.2917	3.665	0
LPI 14:1	1.6665	1.481	0	1.7279
LPI 16:0	2.0013	1.256	2.1968	2.1178
LPI 16:1	1.306	0.9304	2.1043	2.1231
LPI 18:0	3.1325	2.512	2.437	2.2195
LPI 18:1	2.3606	2.0551	2.6092	2.4318
LPI 18:2	0	1.5281	0	0
LPI 20:0	3.0428	2.2678	0.8236	0.8495
LPI 20:1	0	0	2.197	1.9977
LPI 20:3	0	0.9984	0	0
LPI 20:4	0	0.6648	0	0
LPI 20:5	0	1.33	0	0
LPI 22:0	1.8274	1.0258	1.9454	1.8594
LPI 22:1	1.0075	0.7201	2.6329	2.0444
LPI 22:2	0	0	2.2188	2.2286
LPI 22:4	0	1.0935	0	0
LPI 22:6	0.9252	0.9112	0	0
LPI 24:1	2.6535	1.1597	3.6777	3.553
LPS 10:0	0	0.6799	0.826	0.9229
LPS 12:0	1.1122	0.7678	0	2.8741
LPS 14:0	3.1939	3.2654	4.0244	3.8807
LPS 16:0	4.2088	3.8482	6.2259	4.9737
LPS 18:3	1.3493	1.2118	1.3854	1.2724
LPS 20:0	3.5308	4.3492	3.6559	3.4191
LPS 20:2	7.8131	6.1147	8.8013	9.745
LPS 22:0	5.5944	5.2274	6.2962	6.1795
LPS 22:4	2.0112	2.3265	3.1665	2.8731
LPS 24:0	3.6761	3.2503	5.1096	5.1452
LPS 26:0	1.4982	1.8754	1.0705	0.9159
PC 24:0	0.7491	0	0	0
PC 24:1	0	0	2.7269	0
PC 26:0	8.9122	0	0	0
PC 26:1	5.3869	4.4814	3.3292	3.1792
PC 28:1	6.6944	3.5033	8.0542	8.4014
PC 28:2	11.1144	7.8251	9.5357	9.431
PC 28:3	18.5953	0	8.1105	9.4253
PC 30:0	14.5122	12.6267	7.0905	8.9934
PC 30:1	5.5356	0	0	0
PC 30:2	0	21.9642	27.4963	28.558
PC 30:5	6.975	6.7995	0	10.2759
PC 32:0	23.5714	15.6287	0	0
PC 32:1	141.779	90.4456	179.943	196.173
PC 32:2	19.0183	18.821	15.2941	16.6531
PC 32:5	2.1265	2.591	4.3638	4.6057
PC 32:6	13.8413	9.8495	13.6555	13.7434
PC 34:1	121.275	79.6035	114.955	133.295
PC 34:2	0	0	30.4659	34.7524
PC 34:3	2.19	0	0.8843	1.3253
PC 34:4	6.5052	10.5605	5.0739	5.4437
PC 34:5	2.7077	4.9404	4.8669	5.3973
PC 34:6	6.791	7.1022	9.1007	9.8162
PC 36:1	29.7476	23.0922	27.9628	32.1986
PC 36:2	79.7496	60.9678	93.8309	103.669
PC 36:3	10.298	5.0394	8.1423	9.5432
PC 36:4	9.2126	5.9514	8.9156	10.2056
PC 36:5	5.4285	4.5938	4.0715	4.701
PC 38:1	12.4247	14.3952	17.6587	18.4453
PC 38:2	8.6395	6.8544	15.1767	13.1617
PC 38:3	5.194	4.4192	7.5284	8.9812
PC 38:4	7.5807	6.363	8.9045	9.9463
PC 38:5	8.7585	5.2651	8.0894	9.1664
PC 40:1	17.2657	16.2613	17.1237	18.8422
PC 40:2	12.0239	12.1135	8.1104	8.354
PC 40:4	3.189	2.7085	6.5863	1.3181
PC 40:5	5.9678	4.8026	0	0
PC 42:1	20.436	20.6361	19.1385	19.3725
PC 42:5	45.4585	39.1577	75.6926	74.8727
PC 42:6	4.9523	3.6987	1.4565	1.3204
PC 44:1	15.1223	15.4572	0	14.9253
PC 44:2	12.6095	13.2165	11.4641	11.8176
PC 44:4	4.2872	10.107	0	0
PC 44:5	4.7412	5.4323	0	2.7682
PC 46:0	5.4908	5.9575	0	0
PC 46:2	9.26	8.7564	7.8112	8.0419
PC 46:4	3.8899	7.2141	0	0
PC 46:5	7.1293	0	0	0
PC 48:1	0	0	4.7599	4.6652
PC 48:4	4.3291	4.3082	3.8631	4.0697
PC 48:6	5.3591	0.4163	0	0
PE 20:0	5.5635	5.0416	5.9673	5.4118
PE 22:0	4.5285	4.1214	6.2828	6.0453
PE 24:0	3.8612	3.4982	9.1801	5.4672
PE 24:1	3.11	4.7479	6.4604	6.3166
PE 26:0	10.4596	8.9696	15.3731	14.9512
PE 26:1	3.9205	6.6873	0	0
PE 28:1	10.0462	5.5253	7.9416	8.1089
PE 28:2	1.9741	0	0	0
PE 28:3	2.557	2.2832	4.5559	4.505
PE 30:0	5.8959	5.5031	9.5765	9.6466
PE 30:1	3.2892	2.186	0	0
PE 30:4	3.5159	4.25	4.3917	5.8315
PE 30:5	2.6644	0	7.9974	0
PE 32:0	6.7683	5.2843	5.9627	6.8626
PE 32:2	135.297	95.4357	175.586	180.625
PE 32:3	6.9952	4.2497	4.5338	4.3118
PE 32:4	0	0	1.157	1.0393
PE 32:5	0	3.6604	0	0
PE 32:6	4.605	0	0	0
PE 34:1	19.6796	17.1624	17.7364	20.4023
PE 34:2	12.4182	11.7197	21.4536	22.4458
PE 34:5	3.4822	2.9945	0	0
PE 34:6	3.8607	3.4654	3.7652	4.3472
PE 36:0	14.0203	9.9682	7.6099	10.0109
PE 36:1	52.5136	40.7971	54.733	62.7244
PE 36:2	27.6422	25.2137	31.2957	33.8526
PE 36:4	0	0	2.3609	2.6995
PE 36:5	0	0	1.2172	1.946
PE 38:0	93.53	69.2192	128.031	130.445
PE 38:1	20.0749	16.5891	21.1251	22.6663
PE 38:2	26.3908	21.3022	30.2177	32.2801
PE 38:3	15.7296	24.1639	14.2955	15.0952
PE 38:4	10.8489	9.7329	10.29	11.5021
PE 38:5	8.9575	6.501	10.4672	11.7154
PE 40:1	6.5469	11.3751	12.1695	12.7652
PE 40:2	8.8014	14.9722	9.4772	10.1476
PE 40:3	10.83	10.7705	2.2585	3.2217
PE 40:4	5.1243	4.8742	4.7056	0
PE 40:5	6.9681	6.0104	6.9553	7.7594
PE 42:1	8.2983	8.803	14.4008	7.2852
PE 42:2	7.1339	8.0753	6.5614	7.03
PE 42:4	8.6165	7.5172	10.5716	10.5576
PE 44:1	10.855	10.8355	9.98	10.847
PE 44:2	13.6039	12.5524	11.0983	11.3087
PE 44:3	4.5062	9.7778	0	0
PE 44:5	7.8775	7.8965	10.6514	10.6673
PE 46:1	0	13.1832	0	0
PE 46:2	12.4844	12.2632	10.684	10.8297
PE 48:0	0	11.2996	13.9522	14.2034
PE 48:1	0	7.2062	0	0
PE 48:2	13.6971	11.1079	6.1775	5.9947
PG 20:0	2.4588	1.5157	2.2929	2.3512
PG 22:0	3.6296	2.97	2.4635	2.4559
PG 24:0	3.9553	3.4811	2.4861	2.5439
PG 24:1	4.2185	3.1899	3.4496	3.3632
PG 26:0	3.6925	3.8087	4.8149	4.7705
PG 26:1	1.9629	1.2466	1.6332	1.7288
PG 28:0	3.8122	3.3913	2.976	2.5429
PG 28:1	8.9868	5.4387	9.8519	9.1717
PG 28:2	41.4638	46.4112	103.101	102.524
PG 28:3	0	4.5234	0	0
PG 30:0	2.7575	1.6883	0	0
PG 30:1	0	0	6.456	6.36
PG 30:3	1.8749	0	1.9943	1.9862
PG 30:4	0	4.8349	1.9149	2.0556
PG 30:5	3.0409	3.1399	7.8263	7.5243
PG 32:0	2.5484	2.5214	2.6071	2.6796
PG 32:1	4.511	0	2.8325	0
PG 32:4	0.9129	3.3492	0	0
PG 32:5	1.8283	2.0748	4.8003	4.8552
PG 32:6	3.2658	1.04	4.0143	3.9377
PG 34:1	2.6391	3.1085	2.0703	1.3082
PG 34:2	6.1824	0	0	0
PG 34:4	1.7233	1.0448	1.7603	1.7353
PG 34:5	2.3713	2.5163	1.3918	1.3244
PG 34:6	3.7978	2.8485	1.5233	1.3325
PG 36:0	3.4352	2.203	2.8413	2.7731
PG 36:4	1.215	0	0	0
PG 36:5	1.1436	0	1.4772	1.2768
PG 36:6	1.7741	1.0179	1.9001	1.8755
PG 38:0	2.0262	2.7502	1.4675	1.5009
PG 38:1	1.6628	0.9262	0.88	0.7251
PG 38:2	0	2.0177	0	0
PG 38:4	0	2.7427	1.7169	1.7603
PG 38:5	4.7561	2.6523	6.2409	8.3799
PG 38:6	1.1627	0	1.6235	1.5731
PG 40:1	5.5116	2.3593	2.5395	2.5938
PG 42:2	0	2.012	0	0
PG 42:4	0.4124	0.5054	0	0
PG 42:6	0	0.7954	0	0
PG 44:1	3.6928	0	0	0
PG 44:4	0.3797	0.0171	0	0
PG 44:5	0.909	0.5001	0.166	0.1536
PG 46:4	0	3.6706	0	0
PG 46:6	0	0	2.4646	0
PG 48:0	1.9499	3.612	0	0
PG 48:6	0.4368	1.2602	0	0
PI 20:0	1.8973	1.6966	2.1081	1.9588
PI 22:0	0	0	1.6718	1.5752
PI 24:0	0	0	4.0636	4.2115
PI 24:1	0	0	6.6371	0
PI 26:0	0	0	3.1251	5.3645
PI 26:1	0	1.809	1.1432	1.2617
PI 28:0	1.3436	0	1.9512	1.9111
PI 28:1	5.8241	2.2873	7.1712	6.8329
PI 28:2	1.5239	1.782	0	2.5261
PI 28:3	2.0533	1.6587	2.386	2.9043
PI 30:0	1.199	0.7958	1.1151	1.2754
PI 30:1	1.0091	0.6946	0.9479	0.9175
PI 30:2	1.1676	0.9583	1.5013	1.4023
PI 30:3	1.3111	0.9606	1.4903	1.5266
PI 30:4	1.1562	0.7872	1.4454	1.4934
PI 30:5	1.7424	0.7798	1.3352	1.4607
PI 32:0	0	2.5369	0.2846	0.3403
PI 32:1	1.1355	0.7986	1.4078	1.3212
PI 32:2	0.8617	0.6877	1.1271	1.1121
PI 32:3	0	1.7288	1.1414	1.0387
PI 32:5	2.0952	0	2.5504	2.6094
PI 32:6	2.9204	0	0	0
PI 34:1	1.3663	0	0	7.3483
PI 34:2	0	0	1.115	1.207
PI 34:3	0.846	0.5857	1.2143	1.2714
PI 34:4	0	0	2.8482	2.5869
PI 34:5	1.1789	0.8025	0	1.0511
PI 34:6	0	0.7617	1.1012	0.9962
PI 36:2	3.3128	3.3574	3.3798	3.5709
PI 36:3	3.3738	6.3586	6.3248	6.3398
PI 36:4	1.4949	0.6776	1.5783	1.7334
PI 36:5	1.2603	0.9788	0.9247	0.9471
PI 36:6	0.7199	0.5507	1.3253	1.2023
PI 38:0	0	2.9579	0	0
PI 38:1	0	3.3351	0	5.1308
PI 38:2	2.0292	1.2023	4.5352	4.6284
PI 38:3	0	0.803	5.0471	5.2261
PI 38:4	1.4161	0.5302	2.5251	1.4063
PI 38:5	1.5183	1.9557	4.7667	5.1607
PI 38:6	0.713	0	0.9645	0.9402
PI 40:2	6.1012	5.1931	0	0
PI 40:3	5.4716	2.4098	0	0
PI 40:4	1.2576	4.333	0	1.0448
PI 40:5	0.8415	0.7173	1.5715	1.8246
PI 40:6	1.0011	2.5389	0.7379	0.79
PI 42:0	1.2098	0.9956	0	0
PI 42:1	2.8495	4.4037	2.7608	2.8474
PI 42:4	0	0	1.8854	0
PI 42:5	1.1089	0.7447	0.8488	1.4862
PI 42:6	0.9828	2.0653	1.9751	1.6279
PI 44:4	1.5635	0	0	0
PI 44:5	0	1.009	0.3327	0
PI 44:6	0.7864	0	0	0
PI 46:4	0	1.0367	0	1.7133
PI 46:6	0	0.5602	0	0
PI 48:6	0.4234	0	0.7241	1.1728
PS 22:0	5.0346	3.6814	0	0
PS 24:0	5.924	5.0673	0	0
PS 24:1	4.0812	4.2451	6.6549	6.2445
PS 26:0	0	6.4074	10.5699	10.4717
PS 26:1	0	4.744	7.3387	7.4609
PS 28:1	2.0904	2.9827	4.1989	0
PS 28:2	1.5311	1.1953	0	0
PS 30:0	0	5.6808	0	0
PS 30:1	3.8968	2.184	4.6158	4.5842
PS 30:2	0	2.3696	4.2701	3.9992
PS 30:3	2.0619	1.7788	2.5759	2.4716
PS 30:4	3.7053	4.2499	3.3596	3.3433
PS 32:4	3.9476	3.1693	3.3561	4.8731
PS 32:5	0	0	4.0747	4.0144
PS 34:1	4.4267	3.2475	4.2939	4.5347
PS 34:2	3.5935	4.0598	4.8069	4.5891
PS 34:3	0	1.7381	0	0
PS 34:4	3.1058	3.3428	4.3839	4.2367
PS 34:5	2.0853	0	3.4422	3.4727
PS 34:6	3.1136	2.4259	4.8693	3.7677
PS 36:0	3.2648	5.132	6.5162	7.2843
PS 36:1	18.4783	21.532	32.8082	37.1126
PS 36:2	2.8189	3.2297	4.3136	5.0036
PS 36:4	3.637	2.2177	5.6919	5.6127
PS 36:5	2.6527	2.2967	3.9103	3.6411
PS 36:6	2.2718	2.0692	3.465	3.3884
PS 38:0	68.2715	50.1804	98.9457	97.4278
PS 38:1	5.5054	5.7039	6.6598	7.19
PS 38:3	0	3.8281	1.2271	1.4635
PS 38:6	2.3054	2.1362	2.9623	2.9411
PS 40:0	0	16.4993	0	0
PS 40:3	0	0	0.9795	0
PS 40:4	4.4024	4.6037	0	4.2515
PS 40:6	2.8047	0	0	0
PS 42:0	7.0262	2.4634	0	0
PS 42:1	7.7638	0	0	0
PS 44:0	6.2684	7.8364	0	0
PS 44:1	0	8.6635	0	0
PS 44:3	2.4303	0	0	0
PS 46:0	2.6551	3.1993	0	0
PS 46:3	0	0	0.3317	0
PS 46:4	0	0	0.6167	0.5266
PS 46:5	3.92	4.6349	6.0626	6.2259
PS 48:0	2.4638	0	0	0
PS 48:1	3.793	4.2611	0	0
PS 48:4	15.836	22.7298	33.0826	34.1338
PS 48:6	0	2.9184	0	0
SGalCer 30:1;2	4.7577	0	5.7669	5.3348
SGalCer 32:0;3	3.3203	0	0	0
SGalCer 32:1;3	2.8775	2.6324	4.0377	4.0448
SGalCer 34:0;3	2.9157	2.4952	4.3622	3.7787
SGalCer 34:1;3	3.4069	3.0125	4.8769	0
SGalCer 34:2;3	2.9556	2.4879	3.5689	3.481
SGalCer 36:0;3	5.5764	0	0	0
SGalCer 38:0;3	3.4673	2.5437	5.9509	6.5597
SGalCer 40:0;3	3.4212	4.7177	5.781	6.8538
SGalCer 42:0;3	0	16.3432	0	0
SGalCer 44:0;3	0	0	1.0348	1.3281
SM 28:0;2	6.5794	7.0902	4.4035	2.8541
SM 28:1;2	8.4714	8.6682	0	5.9463
SM 30:0;2	7.2079	3.7852	0	0
SM 30:1;2	0	8.8764	0	0
SM 32:0;2	14.251	9.2702	0	0
SM 32:0;3	10.8855	8.4005	0	0
SM 32:1;2	5.2377	9.9679	9.2819	10.2135
SM 32:1;3	8.1138	6.7619	5.8518	5.9626
SM 32:2;2	11.9677	0	0	0
SM 34:0;2	4.0558	2.7824	3.819	4.1146
SM 34:0;3	0	6.8725	2.7779	3.3345
SM 34:1;2	38.8238	20.1408	26.4902	30.5125
SM 34:1;3	8.0511	8.3091	5.8855	5.6299
SM 34:2;2	7.3933	5.6724	6.8065	4.4334
SM 36:0;2	0	0	1.7072	1.6741
SM 36:0;3	3.5882	3.5462	2.6203	2.3645
SM 36:1;2	10.565	4.3271	4.5897	4.8782
SM 36:2;2	4.2073	3.8659	3.4502	3.5452
SM 36:2;3	7.6948	6.922	6.2034	6.1683
SM 38:0;2	1.6662	1.5874	1.7068	1.7923
SM 38:0;3	0.391	0	0.448	0.2056
SM 38:1;2	3.909	3.8972	4.7185	6.9222
SM 38:1;3	5.4427	5.3002	4.5818	4.8195
SM 38:2;2	4.1336	4.4614	3.9915	2.373
SM 38:2;3	5.1657	5.9723	4.7098	4.6914
SM 40:0;3	4.4203	4.0205	7.9726	8.9526
SM 40:1;2	0	6.2434	0	0
SM 40:1;3	7.2612	4.5353	2.2657	3.5482
SM 40:2;2	14.2326	7.4223	6.6456	17.4821
SM 40:2;3	11.3104	0	10.9838	11.0919
SM 42:0;2	8.5907	0	0	0
SM 42:0;3	4.5157	4.4862	4.3764	4.4664
SM 42:1;2	20.1691	16.1068	16.0558	18.5804
SM 42:1;3	8.5425	7.9043	6.5927	8.9049
SM 42:2;2	29.4395	22.7599	28.5673	29.7852
SM 42:2;3	12.6008	12.5093	0	13.9164
SM 44:0;2	8.7296	9.1375	8.182	8.3451
SM 44:0;3	2.9374	1.6146	3.2779	3.6238
SM 44:1;2	12.0401	11.6297	12.5714	13.2194
SM 44:1;3	7.0584	5.4568	6.4947	6.504
SM 44:2;2	12.5545	14.2193	22.349	22.7474
SM 44:2;3	7.0472	7.0304	8.0239	7.8881
SM 46:0;2	6.6423	5.934	6.2853	6.5257
SM 46:1;2	8.2185	8.2375	10.5315	11.0323
SM 46:2;2	4.6039	4.8399	1.8831	4.3648
TAG 30:0+NH4	47.2455	42.9419	33.8168	34.9526
TAG 32:0+NH4	31.4205	29.9915	21.2564	22.4225
TAG 34:0+NH4	33.4302	31.5523	30.0856	30.4763
TAG 34:1+NH4	31.2152	31.2546	24.6425	30.8651
TAG 36:0+NH4	26.0733	26.1481	30.3745	31.477
TAG 36:1+NH4	30.5611	30.8447	28.2525	28.923
TAG 38:1+NH4	0	19.0709	0	0
TAG 38:2+NH4	11.4915	11.9242	9.2053	9.5445
TAG 40:2+NH4	10.167	15.8798	0	0
TAG 42:0+NH4	28.2408	22.6422	27.0654	27.6759
TAG 42:1+NH4	20.4075	21.9664	19.1926	24.0033
TAG 42:2+NH4	16.2131	22.7042	0	0
TAG 44:0+NH4	32.2925	36.2745	45.661	46.9429
TAG 44:1+NH4	33.5994	38.2102	39.7946	40.8752
TAG 44:2+NH4	23.2244	25.7402	22.7638	25.6703
TAG 46:0+NH4	46.8679	54.4688	72.5089	73.5971
TAG 46:1+NH4	68.0888	79.4458	92.3226	93.4784
TAG 46:2+NH4	50.0286	53.8104	61.3719	62.5475
TAG 46:3+NH4	11.2932	13.5583	0	0
TAG 48:0+NH4	53.1974	61.052	73.7587	74.1678
TAG 48:1+NH4	101.497	117.68	134.161	137.665
TAG 48:2+NH4	90.9355	98.579	111.74	113.067
TAG 48:3+NH4	34.5262	36.3511	39.7885	40.4946
TAG 50:0+NH4	32.8677	34.7058	37.4816	38.3169
TAG 50:1+NH4	79.435	89.4348	98.6319	98.881
TAG 50:2+NH4	92.5184	98.3463	110.809	111.854
TAG 50:3+NH4	51.8564	51.5708	57.539	58.9125
TAG 52:0+NH4	11.2623	12.1219	13.4917	13.7981
TAG 52:1+NH4	38.5623	45.3395	42.908	43.8241
TAG 52:2+NH4	56.7411	65.5702	69.4892	71.3712
TAG 52:3+NH4	40.0813	42.7614	45.9564	46.1603
TAG 54:0+NH4	9.0381	9.7967	12.1776	12.1235
TAG 54:1+NH4	14.538	16.9556	24.0146	24.5628
TAG 54:2+NH4	19.9854	20.8305	26.3476	26.8265
TAG 54:3+NH4	20.1189	22.7224	31.5591	27.213
TAG 54:6+NH4	11.7518	15.7258	11.0273	11.3286
TAG 56:0+NH4	11.1115	10.8253	14.8283	16.2409
TAG 56:1+NH4	17.1348	17.6134	22.2946	23.1287
TAG 56:2+NH4	13.9427	13.9005	15.3634	16.1963
TAG 56:3+NH4	6.5597	6.5673	7.6109	7.8699
TAG 56:4+NH4	8.5116	8.696	7.668	7.8501
TAG 56:6+NH4	7.0676	8.119	10.3625	10.6718
TAG 58:0+NH4	8.7471	8.3646	12.1874	11.6257
TAG 58:1+NH4	15.5765	15.6103	19.4322	20.5343
TAG 58:2+NH4	14.1522	13.5695	15.2686	16.3257
TAG 58:3+NH4	4.806	4.328	7.125	9.2309
TAG 58:6+NH4	8.5787	9.2432	8.4684	8.9173
TAG 58:8+NH4	3.6128	1.5599	4.1624	4.3756
TAG 60:0+NH4	3.7431	3.3249	2.8924	9.3792
TAG 60:1+NH4	4.7265	4.7772	11.7413	12.9065
TAG 60:11+NH4	0	0	3.4871	3.3982
TAG 60:2+NH4	12.8657	13.1557	14.7964	15.0381
TAG 60:3+NH4	2.977	4.901	7.9336	9.2757
TAG 60:4+NH4	6.8008	7.0285	6.1058	6.3111
TAG 60:5+NH4	5.2592	7.6372	9.1338	8.6345
TAG 60:6+NH4	0	7.6428	0	3.3096
TAG 62:0+NH4	0	2.734	10.6928	10.1856
TAG 62:1+NH4	2.3452	0	2.2758	2.4506
TAG 62:11+NH4	0	2.3133	0	0
TAG 62:12+NH4	0	0	6.2432	0
TAG 62:2+NH4	0	2.382	4.0476	0
TAG 62:3+NH4	0	5.3716	7.3798	7.3257
TAG 62:4+NH4	7.1109	8.5432	6.4752	4.3369
TAG 62:5+NH4	9.2679	6.391	5.7141	5.6169
TAG 62:6+NH4	0	6.4906	6.8338	6.2397
TAG 62:7+NH4	0	8.1083	0	0
TAG 62:8+NH4	3.5453	3.7157	2.036	0
TAG 64:0+NH4	0	1.1742	8.5543	9.0403
TAG 64:11+NH4	0	4.8256	0	0
TAG 64:12+NH4	1.818	0	0	0
TAG 64:2+NH4	2.459	0	0	2.6127
TAG 64:3+NH4	3.8538	3.7795	0	0
TAG 64:4+NH4	6.3159	5.7196	5.8263	6.2712
TAG 64:5+NH4	6.8755	0	5.3789	5.8794
TAG 64:6+NH4	5.5605	6.9745	5.1734	6.6464
TAG 64:7+NH4	7.6632	5.7407	0	0
TAG 64:8+NH4	0	5.1464	0	0
TAG 64:9+NH4	2.3406	3.5013	2.1377	2.058
TAG 66:0+NH4	1.0351	1.1125	5.8631	1.2872
TAG 66:10+NH4	0	4.3165	0	0
TAG 66:3+NH4	4.6553	4.0287	2.3179	2.3482
TAG 66:4+NH4	7.895	7.2889	7.5644	8.0559
TAG 66:5+NH4	8.0439	8.3304	7.141	7.3239
TAG 66:6+NH4	5.3224	6.2188	5.8804	6.1879
TAG 66:7+NH4	5.0365	5.1534	5.0685	4.5034
TAG 66:8+NH4	6.3443	6.1058	5.9008	6.1024
TAG 66:9+NH4	4.4465	6.0693	3.6976	4.1773
TAG 68:0+NH4	7.4181	8.3889	1.0957	8.4604
TAG 68:10+NH4	0	4.7311	3.4813	3.4753
TAG 68:4+NH4	7.1641	7.0685	7.0383	7.2251
TAG 68:5+NH4	5.8194	7.635	6.3315	7.0211
TAG 68:6+NH4	0	5.4384	0	0
TAG 68:8+NH4	5.4484	5.2511	4.7347	4.811
TAG 68:9+NH4	4.8854	0	4.3527	4.4203
TAG 70:0+NH4	9.8874	7.6419	9.7773	11.7492
TAG 70:10+NH4	7.3327	7.6873	5.782	5.9496
TAG 70:4+NH4	6.5114	7.5507	6.8562	1.3382
TAG 70:5+NH4	7.3713	7.9007	6.3767	6.8424
TAG 70:8+NH4	5.1686	5.2011	0	4.9755
TAG 72:0+NH4	11.7057	0	12.0527	12.1923
TAG 72:1+NH4	6.9559	2.0194	4.787	4.1902

## Sheet: Supplementary Table4
Table S4: Peak areas of the lipid species identified by LipidView for lipidomics analysis of IPSC cells in micro flow LCMSMS
Micro_IPSC
Micro_Lipid Species Peak area	IPSC_sample1	IPSC_sample1r	IPSC_sample2	IPSC_sample2r
CE 14:1+NH4	128.621	229.371	149.216	98.5376
CE 16:1+NH4	268.191	483.379	182.038	54.3726
CE 18:1+NH4	240.299	323.811	175.807	99.4956
CE 18:2+NH4	93.9852	157.012	71.3365	51.1306
CE 18:3+NH4	0	0	59.354	40.408
Cer 30:1;2	5.0381	6.3534	0	0
Cer 30:2;2	8.6102	7.2311	0	3.3132
Cer 32:0;2	6.7895	13.4612	1.5922	0
Cer 32:0;3	31.4726	40.2862	15.9052	27.6802
Cer 32:1;2	13.8964	25.742	2.6647	0
Cer 34:0;2	0	22.3878	0	0
Cer 34:0;3	15.0349	18.3927	0	6.0587
Cer 34:1;2	0	49.4757	3.087	0
Cer 34:2;2	0	20.6644	0	0
Cer 34:2;3	10.5181	0	0	0
Cer 36:0;2	10.151	21.7735	0	0
Cer 36:0;3	21.0189	21.0453	5.2007	5.4015
Cer 36:1;2	21.7445	62.9795	0	0
Cer 36:2;2	18.0293	42.7681	0	0
Cer 38:0;2	0	14.3707	0	0
Cer 38:1;3	15.503	19.1971	6.0612	7.7963
Cer 38:2;2	0	36.4678	0	7.0146
Cer 40:1;2	12.2739	24.462	0	0
Cer 40:1;3	18.1217	23.2969	8.4586	12.4923
Cer 40:2;2	0	26.1837	0	0
Cer 40:2;3	15.4055	16.3755	5.7112	8.6164
CerP 30:1;2	104.056	0	52.7356	33.1294
CerP 30:2;2	140.773	0	0	0
CerP 32:1;2	210.005	251.299	137.085	94.716
CerP 34:0;2	94.5061	0	0	0
CerP 42:0;3	99.5792	0	79.5318	0
DAG 26:1+NH4	10.0754	9.8537	12.0739	13.7759
DAG 28:0+NH4	0	0	0	7.7014
DAG 28:2+NH4	11.5689	10.915	16.824	15.3745
DAG 28:3+NH4	5.2492	5.3469	0	23.1184
DAG 30:0+NH4	0	8.6392	0	0
DAG 30:2+NH4	5.6063	4.495	0	5.7699
DAG 32:0+NH4	8.7236	11.0477	8.8332	11.2424
DAG 32:5+NH4	9.9703	0	0	0
DAG 34:0+NH4	8.9505	12.5952	8.7468	11.1234
DAG 34:4+NH4	10.3576	0	0	8.6614
DAG 36:0+NH4	0	16.4918	9.4604	13.4803
DAG 36:7+NH4	43.6628	19.3196	17.2626	30.5113
DAG 38:4+NH4	0	0	11.4728	10.3615
DAG 38:6+NH4	53.1477	30.4531	35.9703	58.6411
DAG 38:7+NH4	14.4163	6.0556	13.2716	9.5518
DAG 38:8+NH4	0	11.3979	0	0
DAG 40:10+NH4	36.6225	31.0559	40.7934	60.2066
DAG 40:9+NH4	0	507.982	0	0
DAG 42:9+NH4	11.134	0	0	0
DAG 46:0+NH4	15.1164	26.9435	13.5399	0
DAG 46:1+NH4	15.8915	23.0476	0	0
DAG 46:2+NH4	0	13.0194	0	0
DAG 46:6+NH4	0	0	13.2482	13.4656
DAG 48:0+NH4	22.2638	33.2623	11.8425	11.8816
DAG 48:1+NH4	22.8942	42.9032	12.6847	17.7296
DAG 48:2+NH4	15.2726	30.0798	11.2131	0
DAG 48:6+NH4	0	11.312	0	0
Hex2Cer 30:2;2	16.1804	16.6131	18.8556	28.8415
Hex2Cer 34:1;3	18.2203	36.7418	18.1771	29.5931
Hex2Cer 36:0;3	30.2564	64.2977	39.9776	61.612
Hex2Cer 36:1;3	9.2549	18.9383	13.8987	17.9649
Hex2Cer 36:2;3	7.0201	13.6622	14.4254	21.0542
Hex2Cer 38:1;3	78.653	92.1398	57.31	105.921
Hex2Cer 38:2;3	6.1285	0	0	0
Hex2Cer 42:0;2	5.0377	15.5452	22.5187	0
Hex2Cer 42:0;3	0	0	13.1384	0
Hex3Cer 30:0;2	171.9	238.082	103.045	122.663
Hex3Cer 30:2;2	228.901	0	109.374	81.4711
Hex3Cer 32:0;3	143.292	204.544	83.4155	105.64
Hex3Cer 34:2;2	144.68	0	0	0
HexCer 30:2;2	2.6539	2.6662	2.8002	2.3274
HexCer 32:1;2	4.6517	2.4412	4.1739	3.004
HexCer 34:1;2	2.1428	0	2.1812	0
HexCer 42:0;2	1.0367	0	0	0
HexCer 46:0;2	1.2215	0	4.261	3.325
LPC 10:0	0.9283	0	3.3305	4.395
LPC 12:0	0.7718	4.217	3.9406	2.7996
LPC 14:0	1.3509	4.6988	4.86	0
LPC 14:1	3.8868	10.3066	11.3101	13.0037
LPC 16:0	2.2014	10.7112	10.2283	9.2076
LPC 16:1	5.7077	13.7881	10.0538	12.8895
LPC 18:1	2.263	6.0028	13.9756	24.3676
LPC 18:2	6.9811	17.5217	14.5148	27.6539
LPC 18:3	3.329	10.7904	8.1608	15.1256
LPC 20:2	5.256	13.4883	12.7431	20.5675
LPC 20:3	5.6315	15.2848	11.3463	19.6029
LPC 20:4	2.5628	0	4.9134	8.8713
LPC 20:5	0	7.4985	5.7728	6.9433
LPC 22:4	2.3088	8.0059	5.8266	9.965
LPC 22:6	4.0685	10.1482	7.961	13.0974
LPE 14:0	4.0063	10.0384	14.4692	15.2266
LPE 14:1	3.915	11.3286	15.3019	23.1445
LPE 16:0	7.8507	19.3494	21.1847	22.694
LPE 16:1	52.1302	124.516	98.4184	191.024
LPE 18:0	22.2815	51.8281	55.0436	43.5019
LPE 18:1	17.0974	39.2752	35.7129	29.6409
LPE 18:2	10.1093	24.9837	32.2279	41.8884
LPE 18:3	34.2052	79.4104	63.3649	120.644
LPE 20:0	10.5159	31.6464	29.6942	35.4906
LPE 20:1	10.9293	24.9821	38.3526	40.36
LPE 20:2	11.0821	32.75	23.4874	36.0234
LPE 20:3	18.0069	35.9991	37.48	59.0233
LPE 20:4	9.4116	27.1294	22.7518	47.3968
LPE 20:5	0	29.7001	18.6152	31.5291
LPE 22:1	8.384	10.6062	0	19.8914
LPE 22:2	22.6769	49.2143	39.6984	62.8761
LPE 22:4	9.4654	0	16.5505	27.708
LPE 22:6	32.3458	72.9482	54.41	100.296
LPE 24:0	19.2063	0	0	0
LPE 24:1	33.2251	83.425	0	114.601
LPG 10:0	3.5346	5.1999	1.9898	7.7989
LPG 12:0	4.9936	7.9177	3.6672	6.8981
LPG 14:0	7.0033	5.7848	3.7951	10.4833
LPG 16:1	3.7018	5.133	0	6.8636
LPG 20:0	2.8776	0	0	6.04
LPG 20:1	5.1305	0	0	0
LPG 24:1	0	15.3018	0	8.6212
LPS 14:0	7.75	10.7073	14.3366	9.4221
LPS 16:0	0	12.9217	19.6653	15.3047
LPS 20:0	13.3023	17.6221	0	16.268
LPS 20:2	28.7708	37.563	36.6658	43.7843
LPS 20:3	0	6.0096	0	0
LPS 22:0	18.3983	23.0375	31.8149	28.6008
LPS 22:4	13.9024	17.7335	17.6587	19.3257
LPS 24:0	21.3174	26.9532	25.6324	28.7025
PC 20:0	0	0	0	8.5399
PC 26:0	1.7682	0	0	0
PC 26:1	2.2533	5.1786	7.182	10.2201
PC 28:2	7.1399	24.524	12.01	18.3205
PC 28:3	0.8417	2.293	0	0
PC 30:0	13.5536	30.428	41.8491	69.6737
PC 30:1	4.0122	9.35	15.4627	22.8691
PC 30:2	9.0222	11.135	15.513	16.9009
PC 30:5	6.7821	14.8223	12.6668	18.4768
PC 32:0	10.7473	24.3458	33.6012	48.322
PC 32:1	74.9805	181.507	159.131	271.325
PC 32:2	6.1926	15.8254	0	28.171
PC 32:3	3.4905	0	7.6111	4.2719
PC 32:5	6.6511	15.9083	12.8943	21.2006
PC 32:6	4.9857	11.6058	8.7763	14.5895
PC 34:0	0	0	0	13.417
PC 34:1	40.2747	86.0848	122.184	173.769
PC 34:2	16.8222	35.9681	54.219	83.592
PC 34:3	3.986	9.2422	11.8444	18.9724
PC 34:4	3.1658	5.0836	8.2364	9.1638
PC 34:5	3.4633	7.8832	8.1841	12.5099
PC 34:6	3.2189	7.0633	6.7697	8.6487
PC 36:1	8.2758	19.8856	30.7265	42.8063
PC 36:2	25.2584	55.4715	82.977	113.908
PC 36:3	7.3744	16.3101	22.5617	34.361
PC 36:4	5.9151	12.802	16.5056	25.1451
PC 36:5	3.5628	8.8036	9.1939	14.4431
PC 38:0	2.1833	10.2966	8.9322	0
PC 38:1	0	0	2.9728	5.9036
PC 38:2	4.8402	11.3792	26.2258	26.1336
PC 38:3	3.4295	10.4595	18.4451	21.6229
PC 38:4	0	10.969	0	22.0907
PC 38:5	4.2875	9.5842	11.7155	18.5204
PC 40:2	0	0	8.1194	0
PC 40:3	0	0	3.3504	0
PC 40:4	2.0416	5.3211	6.8234	9.95
PC 40:5	2.1407	0	4.8487	6.1638
PC 40:6	3.8918	12.1923	6.7895	11.1958
PC 42:5	19.1781	45.65	32.9402	55.2789
PC 44:5	2.8135	0	0	0
PC 48:0	4.6908	0	22.9215	46.1826
PC 48:2	0	6.7488	0	0
PC 48:4	0	0	20.6543	37.8423
PE 20:0	25.264	55.6208	51.284	66.6319
PE 22:0	11.3618	25.4504	31.6818	15.6039
PE 24:0	13.6824	31.0288	35.6893	34.6595
PE 24:1	14.5388	44.2854	0	45.3091
PE 26:0	34.5322	76.9202	59.8003	99.935
PE 28:1	22.1331	42.3822	30.2829	45.3837
PE 28:3	0	0	0	27.249
PE 30:0	20.6118	41.2997	44.7014	58.5399
PE 30:1	27.8601	46.449	37.0135	46.0543
PE 30:4	12.1491	0	28.0096	37.188
PE 30:5	8.659	16.4727	39.5455	24.5687
PE 32:0	14.2326	0	21.01	0
PE 32:2	330.49	731.717	518.082	866.513
PE 32:3	10.9251	23.4315	24.3061	45.6427
PE 32:5	14.9594	32.9243	30.2921	40.543
PE 32:6	533.371	60.5331	1081.09	1465.22
PE 34:0	12.6788	25.4542	37.8296	41.5926
PE 34:1	0	0	48.1533	66.6838
PE 34:2	0	41.0916	57.5701	60.9689
PE 34:4	10.0687	0	0	0
PE 34:6	17.7201	40.1853	31.2884	50.6408
PE 36:1	18.4148	83.6951	127.068	142.921
PE 36:2	33.8601	67.1857	72.3431	95.5206
PE 36:3	10.4788	0	17.1345	17.3542
PE 38:0	189.995	406.395	284.61	475.998
PE 38:1	17.1391	24.8756	38.5019	36.023
PE 38:2	16.923	34.5479	40.6503	56.0632
PE 38:3	17.4088	35.4193	37.8447	54.6059
PE 38:4	15.2192	29.7669	32.6667	21.6222
PE 38:5	28.2507	59.3836	50.0433	79.236
PE 40:3	0	0	26.4855	24.4259
PE 40:4	14.118	28.7587	38.1101	50.0338
PE 40:5	15.7258	31.4553	32.2191	48.9514
PE 42:4	0	0	16.2982	0
PE 46:4	0	0	45.4656	44.8437
PE 48:0	0	0	34.3737	0
PG 28:0	3.2183	0	0	0
PG 28:2	284.131	340.367	196.724	487.987
PG 30:1	6.5918	0	0	0
PG 30:5	6.3389	9.4383	4.8741	7.2682
PG 32:5	12.7858	15.2498	4.3898	14.5446
PG 34:2	3.7253	0	0	0
PG 40:1	9.8929	0	5.6286	18.1643
PI 42:6	38.7639	31.9877	0	24.4417
PS 22:0	25.2082	28.7509	28.6033	21.0176
PS 24:0	26.8925	34.5558	39.0848	48.2835
PS 24:1	28.5623	37.8811	35.008	44.7626
PS 26:0	32.315	40.6498	36.3701	47.428
PS 28:1	23.6248	33.0223	26.9816	34.0267
PS 28:2	17.0966	0	17.492	15.5545
PS 28:3	20.3976	24.6331	19.5847	24.9662
PS 30:1	21.7263	27.4795	25.3238	30.2659
PS 30:2	18.5383	24.0337	20.3167	26.1767
PS 30:3	16.5526	22.4976	16.6825	0
PS 30:4	17.471	21.7182	18.4915	21.4208
PS 30:5	26.8979	34.0493	29.1536	34.93
PS 32:2	0	0	18.4113	0
PS 32:4	22.5777	30.9629	24.8024	30.094
PS 32:5	21.3428	30.6667	22.7791	30.9602
PS 34:1	10.6456	16.5759	12.2002	15.0535
PS 34:2	0	0	26.4341	10.0272
PS 34:4	20.6816	29.5911	21.1132	25.6666
PS 34:5	24.0977	30.1758	25.4732	31.0412
PS 34:6	25.1336	31.3466	28.3835	33.2019
PS 36:0	0	0	21.1127	0
PS 36:1	40.525	49.2098	42.5343	51.4071
PS 36:2	13.6295	16.4757	13.7436	17.8486
PS 36:4	26.7901	33.2108	24.818	30.906
PS 36:5	20.4973	25.6193	20.6262	27.9004
PS 36:6	18.9071	27.8305	21.9645	25.8089
PS 38:0	165.803	198.43	161.925	190.464
PS 38:1	0	21.8866	19.1458	21.9127
PS 38:3	9.3184	0	9.766	0
PS 38:6	19.426	0	0	22.9548
PS 40:0	22.6121	22.2638	21.5406	21.5192
PS 40:4	9.7491	0	11.445	0
PS 40:5	0	0	27.1661	0
PS 46:5	15.0731	0	0	0
PS 48:0	16.3246	26.9593	19.0311	0
PS 48:4	44.8948	49.8459	37.5198	45.4625
PS 48:6	17.2166	0	0	0
SGalCer 30:2;2	170.772	247.575	121.388	77.2325
SGalCer 32:1;3	231.34	247.94	147.675	118.382
SGalCer 32:2;2	182.934	243.086	114.323	93.1011
SGalCer 34:2;3	189.816	271.318	121.097	96.493
SGalCer 36:0;2	260.293	137.196	320.093	30.4535
SGalCer 38:0;3	124.295	152.878	75.9982	51.8936
SM 30:1;2	117.922	142.911	93.1258	789.103
SM 32:1;2	67.5574	0	63.207	44.0772
SM 32:2;2	0	136.153	0	0
SM 34:0;2	173.586	139.078	84.3453	69.0146
SM 34:1;2	501.44	598.709	505.678	438.367
SM 34:1;3	0	0	0	46.2929
SM 34:2;2	95.5158	116.912	44.2449	53.8267
SM 34:2;3	0	139.482	0	0
SM 36:0;2	0	0	77.7064	0
SM 36:1;2	109.058	130.251	98.2493	57.8184
SM 36:1;3	0	0	0	107.226
SM 38:1;2	0	0	84.8138	0
SM 40:1;2	0	0	66.3939	0
SM 42:0;3	0	218.521	0	0
SM 42:1;2	0	0	0	46.3265
SM 42:2;2	0	0	245.73	0
TA+A274:A323G 30:0+NH4	0.5985	0.9245	0	0
TAG 32:0+NH4	0	0.7957	1.0429	48.2846
TAG 34:0+NH4	0.6762	1.1387	1.326	0
TAG 34:1+NH4	1.4735	2.1914	1.3106	0
TAG 36:0+NH4	0	0	1.3529	0
TAG 36:1+NH4	0.6213	0.9829	0	0
TAG 38:1+NH4	0.6563	0	0	0
TAG 38:2+NH4	0.892	0	1.552	0
TAG 40:3+NH4	0	0	0.9672	0
TAG 42:0+NH4	0	0.9755	1.3831	0
TAG 42:1+NH4	0	0	1.5373	0.85
TAG 44:0+NH4	1.1863	2.2737	2.1021	1.3846
TAG 44:1+NH4	0.9133	0	2.2516	1.4533
TAG 44:2+NH4	0	0	1.9971	1.2513
TAG 46:0+NH4	0	0	2.5571	1.8299
TAG 46:1+NH4	1.8472	4.9255	4.8711	4.2133
TAG 46:2+NH4	1.1547	2.5988	2.9494	1.8991
TAG 48:0+NH4	2.1591	4.296	2.6917	2.2495
TAG 48:1+NH4	3.7391	7.7698	10.9577	10.5871
TAG 48:2+NH4	2.604	6.2733	10.4774	8.0653
TAG 50:0+NH4	2.5036	0	2.3162	1.9941
TAG 50:1+NH4	0	0	15.9882	15.9164
TAG 50:2+NH4	7.5518	12.9652	37.7638	37.4791
TAG 50:3+NH4	2.4039	4.6781	14.0666	10.8712
TAG 50:4+NH4	0	1.3884	2.8197	2.5508
TAG 52:0+NH4	0	0	2.1674	1.8891
TAG 52:1+NH4	7.5926	6.1724	14.2829	13.0397
TAG 52:2+NH4	18.8017	25.5082	87.7333	90.2695
TAG 52:3+NH4	10.5417	14.6137	54.6145	55.17
TAG 52:4+NH4	2.0549	3.9859	13.5875	11.4056
TAG 54:0+NH4	0	0	1.3915	1.3153
TAG 54:1+NH4	1.7079	0	4.5969	4.0296
TAG 54:2+NH4	12.5739	6.9497	42.0417	43.2195
TAG 54:3+NH4	23.4284	28.0756	102.867	107.579
TAG 54:4+NH4	8.1109	10.7814	42.4359	42.5734
TAG 54:5+NH4	2.4435	3.7476	13.7947	11.1617
TAG 54:6+NH4	0.9669	1.7694	5.0924	3.5227
TAG 54:9+NH4	0.9517	0	0	0
TAG 56:1+NH4	0	0	1.2865	1.0373
TAG 56:2+NH4	2.3545	0	8.4221	9.1702
TAG 56:3+NH4	11.1381	4.6675	38.9575	40.2631
TAG 56:4+NH4	8.7475	8.3778	35.2105	38.8361
TAG 56:5+NH4	4.4522	5.5318	23.5796	24.6936
TAG 56:6+NH4	2.567	3.5829	0	0
TAG 56:7+NH4	0.846	1.1431	0	0
TAG 58:4+NH4	2.7444	0	11.0687	11.6634
TAG 58:5+NH4	5.175	3.8801	17.6704	18.7358
TAG 58:6+NH4	3.6748	4.1653	11.6878	12.6123
TAG 58:8+NH4	1.2586	0	5.754	4.699
TAG 60:4+NH4	0	0	2.4847	3.1468
TAG 60:5+NH4	1.3382	0	4.4854	4.941
TAG 60:6+NH4	1.5226	0	5.0312	5.1293
TAG 60:7+NH4	1.2476	1.4027	4.0852	4.6327
TAG 60:8+NH4	0	0	0	3.0312
TAG 62:5+NH4	0	0	0	1.3452
TAG 62:6+NH4	0	0	1.8207	1.4955
TAG 62:7+NH4	0	0	1.8559	1.694
TAG 62:8+NH4	0	0	2.1974	1.7115

## Sheet: Supplementary Table5
Table S5: Peak areas of the lipid species identified by LipidView for lipidomics analysis of IPSC cells in nano flow LCMSMS
Nano_IPSC
Nano_Lipid Species Peak area	IPSC_sample1	IPSC_sample1r	IPSC_sample2	IPSC_sample2r
CE 14:1+NH4	72.8674	70.5195	103.849	103.251
CE 16:1+NH4	131.427	112.957	154.205	147.806
CE 18:0+NH4	39.8113	36.2492	42.4571	39.6462
CE 18:1+NH4	121.976	107.711	119.225	114.403
CE 18:2+NH4	107.116	0	0	41.9662
CE 20:1+NH4	84.983	75.7925	79.8949	78.1276
CE 20:2+NH4	81.0957	66.4467	79.4046	71.217
CE 20:3+NH4	74.1253	69.3181	87.7603	83.0488
CE 22:6+NH4	0	0	68.0209	63.1932
Cer 28:0;2	5.8536	3.0998	1.933	1.7325
Cer 28:1;2	3.9027	3.3791	4.7002	4.2166
Cer 30:0;2	11.7031	9.3059	3.2395	2.9375
Cer 30:1;2	11.1554	9.5102	4.9799	4.6001
Cer 30:2;2	6.6042	5.8372	3.2873	2.8927
Cer 32:0;2	12.9256	9.7253	5.3069	4.4186
Cer 32:0;3	13.8926	11.5939	8.6289	7.9759
Cer 32:1;2	23.996	18.8903	8.8933	7.7903
Cer 32:2;2	6.6586	6.6289	3.9541	3.1154
Cer 34:0;2	18.9998	14.85	8.3932	7.0283
Cer 34:0;3	12.1514	11.4865	0	4.6465
Cer 34:1;2	32.0733	25.2154	14.123	11.4888
Cer 34:1;3	0.4261	0	1.1672	1.3689
Cer 34:2;2	19.6101	15.4411	7.922	7.0139
Cer 34:2;3	3.292	3.0707	1.6034	1.5805
Cer 36:0;2	25.033	18.968	9.6876	8.2014
Cer 36:0;3	13.5405	12.5651	9.1945	8.368
Cer 36:1;2	34.0747	0	14.0545	12.1259
Cer 36:1;3	9.021	8.5629	4.5629	4.1011
Cer 36:2;2	24.1721	18.7625	8.4235	6.844
Cer 36:2;3	2.7821	2.5495	1.9229	1.584
Cer 38:0;2	25.9772	20.5609	9.8306	8.3636
Cer 38:1;2	26.005	20.8214	9.7849	8.4825
Cer 38:1;3	13.3755	10.9421	6.4824	6.1384
Cer 38:2;2	0	16.4461	8.6457	7.622
Cer 38:2;3	0	3.9419	3.1728	2.8114
Cer 40:0;2	18.1921	14.5378	7.7541	6.9909
Cer 40:1;2	20.3877	15.7202	0	8.3755
Cer 40:1;3	21.3957	0	9.8327	9.4041
Cer 40:2;2	14.0209	11.1667	5.9209	5.1594
Cer 40:2;3	7.6536	6.7702	2.6136	2.4993
Cer 42:0;2	16.3713	11.4627	6.0905	5.2522
Cer 42:1;2	12.7267	10.8792	9.4857	6.9657
Cer 42:2;2	7.6106	6.7375	5.4371	4.7375
Cer 44:0;2	14.3091	10.9284	0	0
Cer 44:1;2	10.63	9.428	7.586	7.1948
Cer 46:0;2	14.1999	12.2491	7.3172	6.6312
Cer 46:1;2	13.5078	11.5846	7.9164	6.807
Cer 46:2;2	4.6665	4.3602	0	0
DAG 22:0+NH4	2.108	2.1372	3.3414	3.3598
DAG 24:0+NH4	3.2063	2.853	4.3196	4.3205
DAG 24:1+NH4	6.2738	11.0568	8.8303	8.5074
DAG 26:0+NH4	4.8403	2.3979	0	0
DAG 26:1+NH4	11.8709	12.1783	13.9066	13.6643
DAG 28:0+NH4	6.9115	5.9556	6.6301	6.5792
DAG 28:2+NH4	39.8294	39.7977	21.6566	20.4703
DAG 28:3+NH4	15.2272	13.9265	4.3756	4.748
DAG 30:0+NH4	12.6504	10.6049	8.3593	7.9383
DAG 30:2+NH4	20.5997	0	8.8271	0
DAG 30:4+NH4	10.5257	9.7332	0	0
DAG 30:5+NH4	29.9334	32.6573	36.3766	38.151
DAG 32:0+NH4	29.9096	22.8942	16.503	15.5908
DAG 32:3+NH4	3.8797	0	0	0
DAG 32:4+NH4	2.5609	2.4008	2.573	2.3901
DAG 32:5+NH4	238.061	189.958	130.363	122.82
DAG 34:0+NH4	32.1226	23.447	17.5867	16.8632
DAG 34:4+NH4	7.4972	3.653	0	2.9475
DAG 34:5+NH4	0	0	2.0978	1.7174
DAG 36:0+NH4	24.703	17.5937	15.9811	15.266
DAG 36:4+NH4	0.8744	0	2.6707	2.2466
DAG 36:5+NH4	8.6316	0.5925	2.3706	0
DAG 36:6+NH4	12.3452	11.2967	13.1354	13.9535
DAG 36:7+NH4	50.6935	52.3075	22.5225	21.4899
DAG 38:4+NH4	1.4496	8.1995	4.7805	5.1804
DAG 38:5+NH4	17.095	11.2797	12.4438	12.3674
DAG 38:8+NH4	20.9841	18.0451	13.2284	13.4513
DAG 40:0+NH4	14.9589	13.2079	12.0918	12.968
DAG 40:10+NH4	32.0799	31.7216	25.5447	24.4015
DAG 40:4+NH4	10.0555	9.4672	0	4.1642
DAG 40:5+NH4	9.3438	5.9762	0	0
DAG 40:7+NH4	7.0796	5.7015	3.9741	4.1907
DAG 40:9+NH4	622.17	850.907	1286.02	1300.29
DAG 42:0+NH4	15.4812	13.42	10.0564	9.7452
DAG 42:1+NH4	17.7646	11.3448	14.34	14.0279
DAG 42:2+NH4	15.3066	13.7239	12.8803	17.5726
DAG 42:3+NH4	12.4897	12.6285	0	0
DAG 42:4+NH4	4.1811	6.9708	0	0
DAG 42:8+NH4	0	2.7125	0	0
DAG 44:0+NH4	20.2621	17.7645	13.756	13.5631
DAG 44:1+NH4	16.0821	15.4992	14.6317	14.2135
DAG 44:2+NH4	12.4407	10.9804	13.7264	13.452
DAG 44:3+NH4	10.1376	8.1026	2.9795	2.8847
DAG 44:4+NH4	3.8089	2.9521	0	0
DAG 46:0+NH4	30.4054	25.3008	17.8634	18.1455
DAG 46:1+NH4	28.7483	23.0088	14.0909	13.6127
DAG 46:2+NH4	17.1046	14.6049	10.932	10.6326
DAG 46:4+NH4	7.2457	7.2076	4.4939	3.9668
DAG 46:6+NH4	0	5.0347	6.888	7.0287
DAG 48:0+NH4	40.2298	33.9475	21.7395	21.0522
DAG 48:1+NH4	38.7203	33.7794	23.9114	22.6321
DAG 48:2+NH4	29.0013	23.7329	14.8111	14.3843
DAG 48:4+NH4	0	0	0	4.5789
DAG 48:6+NH4	12.2181	4.5744	3.086	3.3541
HexCer 28:0;2	0	0	1.3502	1.4526
HexCer 28:1;2	1.0156	0.8002	0.8321	0.8755
HexCer 30:2;2	2.006	2.0256	1.1982	1.2213
HexCer 32:0;2	0	0	0	1.4679
HexCer 32:1;2	4.2224	4.342	2.4552	2.7138
HexCer 32:2;2	0	0	0.5674	0.6272
HexCer 34:0;2	0.6238	0.5167	0	0
HexCer 34:1;2	2.5724	2.2538	2.6931	0
HexCer 36:1;2	1.767	1.4696	0	0
HexCer 36:2;2	0.9781	0.8751	1.0814	1.1881
HexCer 36:2;3	2.4428	2.0454	1.3641	1.3361
HexCer 38:0;2	0.7126	1.154	1.5817	1.5679
HexCer 38:1;2	2.1102	1.6331	0	0
HexCer 38:2;3	2.8838	0	0	0
HexCer 40:0;3	0	1.1322	0	0
HexCer 40:1;2	1.132	0.804	0.9049	0.8456
HexCer 40:1;3	1.7854	1.4354	0	0
HexCer 42:0;3	2.081	1.7524	0	0
HexCer 42:1;2	1.5146	1.1739	0.6117	0.6804
HexCer 42:1;3	1.2032	0.9131	0	0
HexCer 42:2;3	0.8451	0.7653	1.6188	1.4459
HexCer 44:1;2	0	0	0	1.2123
HexCer 44:1;3	0.4198	0.6043	0.8961	0
HexCer 44:2;3	1.622	1.2816	0	0
HexCer 46:0;2	0	1.9723	0	0
HexCer 46:1;2	2.4036	0.7311	0	1.5706
LPC 10:0	4.2414	5.2763	9.4891	9.8889
LPC 12:0	3.7795	5.2999	9.2539	9.513
LPC 14:0	7.8225	10.1076	16.4571	17.6325
LPC 14:1	11.1428	14.7494	31.2334	33.6942
LPC 16:0	17.7353	19.7629	16.4875	17.6548
LPC 16:1	12.4208	15.7268	26.4006	29.1334
LPC 18:1	23.8029	27.1703	25.2805	27.3749
LPC 18:2	22.7243	29.0148	40.9389	40.0895
LPC 18:3	6.7262	8.6005	14.2671	14.7982
LPC 20:3	9.2491	10.2246	12.5289	12.899
LPC 20:4	6.3069	8.0078	9.2995	9.4535
LPC 20:5	5.8346	7.3664	11.1586	11.9667
LPC 22:4	5.2204	6.731	8.8561	8.3545
LPC 22:6	8.2367	10.5231	17.7066	19.4035
LPE 10:0	0	25.998	29.1896	28.03
LPE 14:0	49.5005	53.2067	66.8018	65.7342
LPE 14:1	83.125	85.4066	99.7869	99.9878
LPE 16:0	81.429	89.2572	96.3951	97.5711
LPE 16:1	208.965	189.504	366.267	414.395
LPE 18:0	104.976	0	0	0
LPE 18:1	91.5906	97.844	118.501	121.105
LPE 18:2	83.3735	87.3706	131.339	136.916
LPE 18:3	259.063	276.519	312.003	294.192
LPE 20:0	45.5388	42.8008	19.9578	21.484
LPE 20:1	81.3242	87.3204	151.108	158.808
LPE 20:2	69.2036	87.6635	141.966	145.895
LPE 20:3	98.8223	91.3647	96.0541	96.6324
LPE 20:4	104.459	61.1601	66.9175	67.667
LPE 20:5	46.9859	51.1549	53.4309	54.1819
LPE 22:0	0	0	11.8458	11.5451
LPE 22:2	86.9965	86.0746	132.135	123.638
LPE 22:4	0	0	48.5918	48.9368
LPE 22:6	109.1	113.17	180.787	205.116
LPE 24:0	17.9533	15.7482	0	0
LPE 24:1	0	0	0	9.38
LPG 10:0	0	0	32.2094	31.0244
LPG 12:0	0	0	13.5791	14.0289
LPG 14:0	0	0	15.7872	16.9271
LPG 14:1	0	0	14.5689	14.8524
LPG 16:0	0	0	7.7648	7.9658
LPG 16:1	0	0	8.9736	9.9838
LPG 18:0	0	0	10.0959	10.6688
LPG 18:2	0	0	10.1136	10.3047
LPG 18:3	0	0	5.5153	5.7227
LPG 20:0	0	0	7.7027	8.2081
LPG 20:1	0	0	7.906	8.0643
LPG 20:2	0	0	8.3278	8.1323
LPG 20:3	0	0	10.0756	10.8073
LPG 20:4	0	0	23.4789	12.4961
LPG 20:5	0	0	9.5424	14.3461
LPG 22:1	0	0	8.7873	8.7776
LPG 22:4	0	0	11.5832	11.7308
LPG 22:6	0	0	8.6538	8.892
LPG 24:1	0	0	9.0962	7.9325
LPI 10:0	76.5944	0	13.2771	0
LPI 12:0	89.8065	63.3743	2.8187	2.7187
LPI 14:0	68.3288	53.7889	16.2479	16.1465
LPI 14:1	42.8518	34.276	0	0
LPI 16:0	45.69	32.5143	14.6277	16.2384
LPI 16:1	42.2248	34.4876	9.0326	37.8143
LPI 18:0	46.1026	38.3588	0	0
LPI 18:1	46.4073	39.5609	0	15.9254
LPI 18:2	36.9707	32.0779	12.4666	12.4336
LPI 20:0	37.4888	30.6167	15.8399	16.4859
LPI 20:1	32.2314	24.9725	12.4839	12.0593
LPI 20:3	0	34.3557	44.2373	21.3717
LPI 20:4	0	70.2979	0	0
LPI 20:5	0	71.223	0	0
LPI 22:0	25.9773	22.2098	0	9.079
LPI 22:1	32.3633	25.8655	13.2899	12.9709
LPI 22:4	0	0	0	20.355
LPI 22:6	42.3304	37.4533	0	0
LPI 24:1	23.7399	20.0979	9.825	7.9534
LPS 10:0	6.4334	6.2925	5.3954	0
LPS 12:0	20.3797	7.8937	14.5653	14.0483
LPS 14:0	36.641	35.3791	25.0852	24.1713
LPS 16:0	0	55.3392	25.905	26.9061
LPS 20:0	39.6401	36.5201	28.9777	28.4478
LPS 20:2	49.924	43.3574	52.7008	52.136
LPS 22:0	49.0125	47.7254	42.2956	42.2428
LPS 22:1	49.7854	50.6576	44.5371	43.861
LPS 22:4	0	45.3833	28.1115	26.5076
LPS 22:6	0	31.2196	14.6291	9.7748
LPS 24:0	41.2634	0	0	0
MAG 10:0+NH4	12.1331	15.8751	31.378	28.239
MAG 12:0+NH4	33.2985	37.4605	18.8816	16.029
MAG 14:0+NH4	51.6075	38.7007	0	0
MAG 14:1+NH4	24.6461	21.8134	20.0382	23.3709
MAG 16:0+NH4	0	15.8507	19.2036	19.0678
MAG 16:1+NH4	18.1642	15.6448	25.0285	27.3317
MAG 18:0+NH4	131.477	111.037	55.6453	58.4185
MAG 18:1+NH4	41.9484	35.4192	23.654	22.7051
MAG 18:2+NH4	26.1019	0	0	0
MAG 18:3+NH4	25.6435	23.3394	15.1898	14.207
MAG 20:0+NH4	20.6952	20.0695	36.2593	33.3755
MAG 20:1+NH4	70.9035	60.4261	51.4257	26.2483
MAG 20:2+NH4	194.038	157.596	150.024	137.946
MAG 20:3+NH4	18.9301	15.7784	13.1264	13.3392
MAG 20:4+NH4	15.9482	14.1139	16.4323	15.9688
MAG 20:5+NH4	50.2693	47.4622	34.8985	31.6102
MAG 22:0+NH4	19.2865	18.3138	18.7163	18.4856
MAG 22:1+NH4	0	0	41.3633	41.4076
MAG 22:2+NH4	0	0	96.6609	87.883
MAG 22:4+NH4	675.558	748.769	624.784	574.2
MAG 24:0+NH4	31.8	28.3909	26.4722	29.7376
MAG 24:1+NH4	34.4657	28.8945	36.856	36.5941
PC 24:0	1.9999	1.849	2.4152	2.3915
PC 24:1	43.7596	40.5704	42.7644	41.2562
PC 26:1	2.4522	2.4422	0	0.6064
PC 28:1	1.6934	1.6084	4.3444	4.3251
PC 28:2	7.237	8.6153	8.108	8.4868
PC 30:0	12.9825	18.1329	51.791	47.1358
PC 30:1	2.9491	3.8774	14.3954	12.789
PC 30:2	9.7934	11.7151	15.3501	16.7219
PC 30:5	8.5775	11.0958	20.5547	21.4941
PC 32:0	21.3986	29.8966	46.1283	47.1098
PC 32:1	91.415	111.137	196.138	190.786
PC 32:2	7.6967	9.2366	17.6662	17.8843
PC 32:3	1.039	1.3396	9.3905	10.174
PC 32:5	0	1.7399	3.5648	6.1478
PC 32:6	6.9425	8.062	6.5733	6.2428
PC 34:0	6.3957	7.9925	0	0
PC 34:1	28.1026	43.9154	193.413	209.247
PC 34:2	8.19	10.516	76.0911	74.1026
PC 34:3	2.3008	3.0969	14.545	14.3663
PC 34:4	3.4204	4.2049	10.1377	10.639
PC 34:5	9.9292	10.3345	16.4815	16.6342
PC 34:6	4.0985	4.9363	14.266	14.5535
PC 36:0	0	0	0.4328	0.4865
PC 36:1	8.4543	11.8282	33.6638	36.3233
PC 36:2	9.9368	18.2677	127.148	139.415
PC 36:3	2.8853	4.5397	36.4036	35.9819
PC 36:4	4.2626	5.3015	17.8974	18.1767
PC 36:5	0	3.2216	8.9028	9.1131
PC 38:1	4.9622	4.055	9.2324	9.8977
PC 38:2	4.1768	0	30.5585	33.1535
PC 38:3	2.2317	2.7883	28.1215	31.7017
PC 38:4	5.0901	6.702	23.5711	24.9945
PC 38:5	2.1004	2.8879	15.7131	15.608
PC 40:1	0	0.5349	0.654	0.538
PC 40:2	1.008	1.1384	1.3222	1.723
PC 40:3	0.9554	0.8842	3.0981	3.5233
PC 40:4	1.8562	1.7293	8.3998	9.2198
PC 40:5	1.783	2.2697	6.7335	7.4931
PC 40:6	4.4528	5.8	8.7972	9.3884
PC 42:3	1.2204	0	2.011	0.6643
PC 42:5	21.4572	30.5684	40.8879	44.3889
PC 42:6	1.7351	2.7102	3.1027	3.2005
PC 44:5	0	0	1.472	0
PC 44:6	0	0	1.3025	1.2933
PC 46:0	1.453	0	0	0
PC 46:1	0	0	1.1347	0
PC 46:4	1.2733	0	6.2598	0
PC 46:5	1.0675	0.898	0	0
PC 48:1	0	0	3.992	0
PC 48:6	1.2126	1.3537	0	0
PE 20:0	87.5669	97.2538	161.527	167.287
PE 22:0	70.0244	75.4556	104.183	107.777
PE 24:1	87.4973	80.3794	15.5641	16.0583
PE 26:0	164.47	170.707	188.622	184.298
PE 28:1	72.2243	63.2425	25.2556	21.5962
PE 30:0	301.47	233.172	0	0
PE 30:3	128.813	116.148	83.1203	74.4652
PE 30:5	0	0	98.8814	100.684
PE 32:0	0	35.9492	36.6106	35.7625
PE 32:2	1057.22	1085.27	867.533	832.765
PE 32:3	50.1419	52.1974	31.3189	27.1865
PE 32:4	9.7708	12.1818	13.3472	13.1811
PE 32:5	0	0	60.3075	75.2587
PE 34:0	51.9224	53.7703	58.0967	61.5478
PE 34:1	43.4199	50.6348	100.473	100.905
PE 34:2	101.753	103.95	79.2406	73.7082
PE 34:5	49.2381	0	2.3371	5.8114
PE 34:6	195.621	164.282	162.613	153.189
PE 36:0	24.9369	27.732	20.6656	22.4089
PE 36:1	143.078	151.03	173.457	186.41
PE 36:2	59.7137	67.0957	152.248	156.945
PE 36:3	0	0	32.3152	32.6128
PE 36:4	0	0	21.0882	22.3358
PE 36:6	48.3591	13.0575	0	6.0788
PE 38:0	654.866	690.628	585.411	561.406
PE 38:2	0	0	72.6603	75.4665
PE 38:3	0	36.3679	73.5154	77.7155
PE 38:4	20.049	24.9924	78.2536	80.2689
PE 38:5	62.801	62.9084	83.6702	81.1385
PE 40:1	0	0	34.236	25.3654
PE 40:2	0	0	42.2129	47.2433
PE 40:3	52.2932	66.9137	56.5604	57.3074
PE 40:4	0	53.2055	66.2265	70.5209
PE 40:5	20.9873	22.0107	61.8056	65.128
PE 42:1	0	0	32.1681	26.2869
PE 42:2	0	0	29.9631	22.4925
PE 42:4	30.0511	23.4143	39.0757	38.9328
PE 44:1	21.0228	27.7788	0	0
PE 44:3	0	4.677	0	73.9125
PE 44:5	0	5.836	21.5881	20.1128
PE 48:0	47.9669	58.6697	0	0
PE 48:1	0	40.2	0	0
PG 20:0	0	0	8.508	8.7047
PG 22:0	0	0	7.2589	7.0988
PG 24:0	0	0	6.0621	6.2061
PG 26:0	0	0	9.3315	8.8405
PG 26:1	0	0	6.34	6.4723
PG 28:2	0	0	675.317	643.004
PG 28:3	0	0	6.2712	6.7905
PG 30:3	0	0	7.2291	7.0359
PG 30:4	0	0	5.7214	6.2809
PG 30:5	0	0	26.2417	27.0623
PG 32:0	0	0	12.972	0
PG 32:1	0	0	3.1961	2.9541
PG 32:5	0	0	9.0246	9.179
PG 32:6	0	0	4.6842	4.9129
PG 34:0	0	0	2.6405	3.0828
PG 34:2	0	0	6.6933	6.892
PG 34:5	0	0	0	3.0984
PG 34:6	0	0	0	3.8405
PG 36:6	0	0	4.2777	4.8524
PG 40:0	0	0	4.5083	4.4652
PG 40:1	0	0	12.7615	13.4981
PG 40:2	0	0	5.6069	5.7799
PG 40:5	0	0	23.8053	23.9253
PG 42:2	0	0	5.5765	5.9296
PG 42:3	0	0	5.0523	6.001
PG 42:4	0	0	2.9553	6.2172
PG 44:1	0	0	0	1.1598
PG 44:2	0	0	1.0479	1.3734
PG 44:3	0	0	2.505	4.7732
PG 46:3	0	0	0	0.1732
PI 20:0	34.7224	28.1643	12.1489	12.3577
PI 22:0	26.8635	21.9495	9.3875	9.574
PI 24:0	29.9004	28.8048	10.2007	10.5184
PI 24:1	32.7181	25.1335	0	11.836
PI 26:0	27.6992	19.8995	8.5829	7.622
PI 26:1	80.7986	18.8669	8.3695	10.6457
PI 28:0	20.9996	18.1623	0	7.3617
PI 28:1	26.8247	23.9855	12.7038	12.3405
PI 28:2	55.6136	21.6667	9.0137	8.8036
PI 28:3	24.5913	22.4178	0	8.4353
PI 30:1	24.3944	70.7884	6.6503	7.1233
PI 30:2	21.4758	17.4532	8.0921	7.7787
PI 30:3	28.1777	25.0705	12.0365	11.8593
PI 30:4	21.7672	19.2369	8.9537	8.976
PI 30:5	20.6633	18.5704	0	0
PI 32:3	0	17.2992	40.0093	36.5433
PI 32:4	0	10.6297	0	7.1609
PI 32:5	0	0	0	7.7356
PI 32:6	17.5592	17.4594	0	5.7354
PI 34:3	0	0	6.8761	7.0926
PI 36:2	0	0	41.3497	39.6894
PI 36:3	0	0	8.5211	8.3343
PI 36:4	0	0	0	7.5096
PI 36:5	0	0	0	19.1173
PI 36:6	0	24.3436	0	4.69
PI 38:0	0	0	0	3.8742
PI 38:1	0	22.9767	0	0
PI 38:2	0	0	0	1.7406
PI 38:3	0	0	11.2344	9.9774
PI 38:4	0	0	0	9.0157
PI 38:5	0	0	12.1196	9.4615
PI 38:6	0	0	24.4135	0
PI 40:0	15.0504	0	0	0
PI 40:1	0	0	0	6.1016
PI 40:5	0	0	0	7.4592
PI 40:6	0	0	11.8209	12.0431
PI 42:3	3.8155	0	0	1.7447
PI 44:0	4.0453	0	0	4.2627
PI 44:2	13.2082	0	0	0
PI 44:6	0	0	0	16.173
PI 46:0	0	0	0	2.3017
PI 46:2	0	0	0	0.9685
PI 46:3	0	0	0	2.2211
PI 48:2	0	0	0	0.9575
PI 48:4	2.2202	0	0	0
PS 22:0	45.7894	45.5674	43.2011	41.7534
PS 24:0	43.5959	49.6778	41.7956	42.5546
PS 24:1	43.1923	43.3834	0	31.7812
PS 26:0	78.4461	72.9525	48.9298	44.9844
PS 26:1	48.9539	44.3215	29.3637	28.4135
PS 28:1	18.3935	0	18.0876	17.4558
PS 28:2	25.6446	25.2481	16.3124	17.0322
PS 28:3	30.4042	28.7466	21.8195	21.6805
PS 30:1	31.4655	27.6608	0	0
PS 30:2	0	0	17.6126	17.377
PS 30:3	18.5905	17.8342	13.1728	12.8165
PS 30:4	28.2743	30.2188	20.1039	19.4452
PS 30:5	35.1891	36.3252	29.6236	29.0016
PS 32:4	27.4377	27.9938	20.1135	20.0411
PS 32:5	31.3243	27.8637	20.4197	20.1795
PS 32:6	49.118	31.6853	22.7221	16.2058
PS 34:0	9.267	8.0722	9.595	7.6151
PS 34:2	0	0	17.8784	18.0564
PS 34:4	0	0	18.7027	0
PS 34:5	29.2837	29.0367	21.065	20.6722
PS 34:6	9.1471	17.6857	15.2679	15.1313
PS 36:0	6.0542	6.6951	15.7246	15.6765
PS 36:1	68.7704	66.5722	33.4763	33.4264
PS 36:4	0	0	20.8499	0
PS 36:5	28.6991	0	15.0404	15.0171
PS 36:6	49.0364	21.4808	15.3272	14.8529
PS 38:0	261.916	277.949	148.239	142.157
PS 38:1	18.2168	18.9137	0	0
PS 38:3	0	3.8283	0	0
PS 40:0	24.8249	0	17.8265	15.0792
PS 40:1	0	0	3.537	3.8991
PS 40:4	15.7767	13.7047	11.2301	12.1522
PS 42:0	15.2349	12.5595	0	9.6875
PS 42:1	0	7.5128	0	0
PS 42:3	0	2.0223	0	2.3838
PS 44:0	0	13.5991	9.2821	0
PS 44:6	36.3634	36.3267	0	0
PS 46:2	12.3303	0	0	0
PS 46:3	0	4.4028	0	0
PS 46:4	0	2.4533	0	0
PS 46:5	0	15.7755	9.1053	6.8414
PS 46:6	1.0116	0	0	0
PS 48:4	42.4915	48.555	33.3519	30.1779
SM 28:0;2	8.9153	7.8878	0	0
SM 28:1;2	34.5842	21.4083	6.4371	5.1611
SM 30:0;2	0	0	6.6988	5.1888
SM 30:1;2	0	25.028	20.1779	0
SM 32:0;2	36.0199	26.6836	6.0848	6.4189
SM 32:1;2	14.7908	12.5001	27.9339	28.2259
SM 32:2;2	0	0	25.6147	20.8873
SM 34:0;2	52.901	46.6619	66.5954	64.2185
SM 34:1;2	112.962	151.693	345.212	308.446
SM 34:1;3	16.8801	14.3709	17.1692	15.6109
SM 34:2;2	43.0796	40.6274	46.9043	59.4965
SM 36:0;3	0	6.6371	0	0
SM 36:1;2	51.5128	0	0	64.7645
SM 36:2;2	24.8497	24.2839	16.028	7.0407
SM 36:2;3	14.7623	19.0563	0	0
SM 38:0;3	0	12.2631	0	0
SM 38:1;2	41.2932	8.1071	0	0
SM 38:1;3	55.154	0	58.3544	60.2518
SM 38:2;2	35.026	0	0	0
SM 38:2;3	36.0048	0	0	0
SM 40:0;3	0	19.8832	38.2783	35.2763
SM 40:1;2	37.296	34.3984	0	0
SM 40:1;3	0	19.6124	24.3182	29.0461
SM 40:2;2	54.9299	28.1268	0	0
SM 40:2;3	0	30.6764	21.632	21.3419
SM 42:0;2	9.906	19.4657	0	0
SM 42:0;3	23.6779	0	22.8519	18.2286
SM 42:1;2	46.4444	41.1478	0	0
SM 42:1;3	6.7886	4.1209	39.1202	35.2723
SM 42:2;2	88.7494	89.8813	0	0
SM 42:2;3	34.4852	27.9437	0.974	2.0765
SM 44:0;2	39.7482	24.4543	0	0
SM 44:0;3	0	0	16.9205	15.3763
SM 44:1;2	56.6191	41.6363	0	0
SM 44:1;3	20.2732	12.7058	0	0
SM 44:2;2	67.7244	62.6329	0	0
SM 44:2;3	28.7243	0	0	0
SM 46:0;2	0	27.5278	0	0
SM 46:1;2	0	22.8066	32.3975	0
SM 46:2;2	55.5776	0	56.6841	0
TAG 30:0+NH4	5.7662	3.594	1.9576	1.9836
TAG 32:0+NH4	2.7936	0	0	0
TAG 34:1+NH4	2.0853	1.5648	1.4813	2.7592
TAG 36:0+NH4	0	0	2.4769	2.5491
TAG 38:1+NH4	3.4496	3.0175	2.8666	2.7359
TAG 40:0+NH4	0	0	2.3747	2.1103
TAG 40:1+NH4	4.355	0	2.3318	2.4442
TAG 42:0+NH4	3.897	2.8069	1.9811	2.0321
TAG 42:1+NH4	0	2.2279	2.6872	2.4955
TAG 42:4+NH4	2.6683	3.3174	2.2608	2.153
TAG 44:0+NH4	7.1796	4.7368	3.0546	3.0907
TAG 44:1+NH4	4.5709	3.3308	2.7465	2.8475
TAG 44:2+NH4	4.4908	3.0045	2.3428	2.443
TAG 44:4+NH4	1.416	1.9256	0	0
TAG 46:0+NH4	9.8834	6.4506	4.4253	4.6331
TAG 46:1+NH4	8.8752	5.8036	5.2508	5.5681
TAG 46:2+NH4	7.9202	5.2212	3.1442	3.1329
TAG 46:3+NH4	0	0	1.9605	1.9727
TAG 48:0+NH4	11.4059	7.5952	5.4773	5.4853
TAG 48:1+NH4	13.722	9.9699	12.1478	14.1581
TAG 48:2+NH4	10.3079	7.2198	8.4122	8.5378
TAG 48:3+NH4	4.4754	2.4123	3.0684	3.142
TAG 50:10+NH4	1.793	1.4471	0	0
TAG 50:2+NH4	18.81	15.9175	29.356	34.9136
TAG 50:3+NH4	7.0139	5.6655	9.0108	9.8742
TAG 50:4+NH4	0.3803	1.5903	2.9459	2.9506
TAG 50:5+NH4	2.5283	2.4972	0	0
TAG 52:0+NH4	4.9559	3.5381	3.075	3.166
TAG 52:1+NH4	14.7497	12.5132	18.7919	17.3002
TAG 52:10+NH4	1.1881	0	0.9473	1.0641
TAG 52:2+NH4	39.092	34.3076	76.9947	80.2187
TAG 52:3+NH4	19.2453	15.7733	42.1158	44.4833
TAG 52:4+NH4	6.0809	3.9417	10.0106	12.3775
TAG 54:0+NH4	5.1885	3.4377	2.6981	2.4836
TAG 54:1+NH4	8.3462	6.3998	7.1015	7.1038
TAG 54:10+NH4	0	0	0	0.3811
TAG 54:2+NH4	23.0955	23.9191	48.1185	43.8747
TAG 54:3+NH4	44.878	40.357	100.215	101.279
TAG 54:4+NH4	12.2717	10.625	30.3423	34.0638
TAG 54:5+NH4	4.5879	4.2167	9.0041	10.0295
TAG 54:6+NH4	2.9437	3.433	2.7741	3.2547
TAG 56:0+NH4	4.7732	0	2.3576	2.2269
TAG 56:1+NH4	0	4.9149	4.336	4.3145
TAG 56:12+NH4	0	0	0.0591	0
TAG 56:2+NH4	7.8517	6.8781	10.7671	10.7396
TAG 56:3+NH4	19.4244	21.0863	49.1583	48.3756
TAG 56:4+NH4	13.6874	13.2963	37.6676	37.6431
TAG 56:5+NH4	8.6103	9.667	0	0
TAG 56:6+NH4	3.9113	0	0	0
TAG 58:0+NH4	4.9707	0	2.8173	0
TAG 58:1+NH4	5.9704	4.0427	2.0242	1.5332
TAG 58:10+NH4	0	1.5619	0	0
TAG 58:11+NH4	0	0	0.2687	0
TAG 58:12+NH4	0	0	0.0772	0
TAG 58:2+NH4	5.2852	3.6686	0	3.693
TAG 58:3+NH4	6.1031	5.2645	11.4639	10.8297
TAG 58:4+NH4	6.6271	6.0016	15.9979	15.6268
TAG 58:5+NH4	6.8923	7.3415	19.8213	18.706
TAG 58:6+NH4	5.1216	5.7192	10.9499	11.0671
TAG 58:7+NH4	0	0	0	3.6915
TAG 58:8+NH4	3.2519	0.4485	3.6278	1.9488
TAG 60:0+NH4	2.3841	1.5306	0	1.5332
TAG 60:1+NH4	3.965	2.5705	0	2.0633
TAG 60:10+NH4	5.0595	3.592	0	0
TAG 60:12+NH4	0.2112	0	0	0
TAG 60:2+NH4	4.0167	0	2.2588	2.5023
TAG 60:3+NH4	2.8205	2.8532	3.7821	3.7133
TAG 60:4+NH4	0	2.5879	4.1792	4.1785
TAG 60:5+NH4	4.584	3.0853	6.0632	6.0264
TAG 60:6+NH4	4.3431	2.2732	6.9865	7.1532
TAG 60:7+NH4	2.151	1.125	3.7501	3.4881
TAG 60:8+NH4	3.4859	0.3863	1.7176	1.7919
TAG 60:9+NH4	2.6028	1.6528	2.7673	3.566
TAG 62:0+NH4	1.2213	1.4522	1.2342	1.2768
TAG 62:1+NH4	3.2589	2.4622	1.6188	1.6319
TAG 62:10+NH4	0	0	3.022	4.0648
TAG 62:11+NH4	0	0	3.7919	0
TAG 62:12+NH4	0.141	0	0	0
TAG 62:2+NH4	4.4952	3.4868	2.1101	1.701
TAG 62:3+NH4	2.4416	1.7953	1.6618	1.5569
TAG 62:4+NH4	2.782	1.6759	1.7319	1.7538
TAG 62:5+NH4	2.5688	1.7207	2.0341	2.033
TAG 62:6+NH4	1.7591	1.5089	2.4931	2.4417
TAG 62:7+NH4	0.335	0	1.8757	1.92
TAG 62:8+NH4	1.6261	1.1889	1.7919	1.7828
TAG 62:9+NH4	0	0	1.4044	1.2376
TAG 64:0+NH4	0	1.1645	0.7734	1.0497
TAG 64:1+NH4	0	1.2427	0	1.547
TAG 64:10+NH4	0	0	1.6764	1.8614
TAG 64:11+NH4	0	0.8812	0	0
TAG 64:12+NH4	0	3.4594	0	0
TAG 64:2+NH4	0	2.6962	1.1339	2.4078
TAG 64:3+NH4	0	0	0	1.1783
TAG 64:6+NH4	0	0	0.8155	1.0274
TAG 64:7+NH4	0	0	0	3.5664
TAG 64:8+NH4	2.1026	1.6097	0	0
TAG 64:9+NH4	0	0	0	2.408
TAG 66:1+NH4	2.1639	2.3449	0	0
TAG 66:12+NH4	0	2.1155	1.6862	0
TAG 66:2+NH4	3.8687	1.873	0	1.7023
TAG 66:3+NH4	0	2.0078	0	1.2704
TAG 66:4+NH4	0	1.9791	0	0
TAG 66:6+NH4	1.6079	1.0355	1.2333	1.2854
TAG 66:7+NH4	0	1.5608	1.2255	1.1391
TAG 66:9+NH4	4.4587	4.2737	0	0
TAG 68:1+NH4	2.4816	1.192	0	1.2662
TAG 68:10+NH4	0	1.7933	0	0
TAG 68:11+NH4	1.4402	2.2783	1.684	2.0364
TAG 68:12+NH4	0	2.3499	0	0
TAG 68:3+NH4	0	0	0.9519	0
TAG 68:4+NH4	0	0	0.6615	0
TAG 68:5+NH4	1.6293	1.0168	0.7146	0.7135
TAG 68:6+NH4	1.4428	1.1728	0.8564	0
TAG 68:7+NH4	1.1393	1.4447	1.1116	1.6875
TAG 68:8+NH4	0	0	2.7527	2.986
TAG 70:0+NH4	0	0	0.7704	0.7811
TAG 70:1+NH4	0	0	1.1187	1.2604
TAG 70:12+NH4	0	3.0144	0	0
TAG 70:2+NH4	0	2.2511	1.0227	1.0904
TAG 70:3+NH4	0	0	1.3232	1.3888
TAG 70:6+NH4	0	1.6327	0	0
TAG 72:0+NH4	0	0	1.1255	1.2179
TAG 72:2+NH4	0	1.6459	0	0
TAG 72:3+NH4	0	0	0.9258	0

## Sheet: Supplementary Table6
Table S6: Peak areas of the lipid species identified by LipidView for lipidomics analysis of WM115 cells in nano flow LCMSMS
Nano_WM115
Nano_Lipid Species Peak area	WM115_sample1	WM115_sample1r	WM115_sample2	WM115_sample2r
CE 14:1+NH4	18.4418	18.334	18.4015	17.2602
CE 16:1+NH4	16.2168	16.114	17.533	16.488
CE 18:0+NH4	2.3542	2.4546	2.8561	2.6804
CE 18:1+NH4	28.2734	27.8689	30.4153	28.5993
CE 18:2+NH4	6.0914	5.6224	6.4278	5.3062
CE 20:0+NH4	0	0	0	0.2665
CE 20:1+NH4	7.0772	6.9075	7.1511	6.7524
CE 20:2+NH4	4.9035	4.5625	5.2801	4.9877
CE 20:3+NH4	5.7123	0	5.9797	5.6055
Cer 28:0;2	5.4751	5.4356	3.7583	3.6907
Cer 28:1;2	6.0584	5.8365	5.9815	5.6436
Cer 30:0;2	5.7073	4.6399	5.9176	5.4903
Cer 30:1;2	10.4155	8.76	10.3398	9.9298
Cer 30:2;2	6.4822	6.7219	5.4915	6.4858
Cer 32:0;2	5.9848	6.0674	4.6304	5.9676
Cer 32:0;3	10.6057	10.2015	10.5711	9.9495
Cer 32:1;2	19.1201	19.2757	19.1987	18.6885
Cer 32:2;2	5.4309	5.266	5.2787	5.1591
Cer 34:0;2	8.1812	8.0441	7.9741	7.575
Cer 34:0;3	0	8.9237	0	0
Cer 34:1;2	23.3492	23.3593	23.094	22.58
Cer 34:2;2	13.978	13.9339	13.6256	13.4022
Cer 36:0;2	5.724	5.8803	5.6272	5.7161
Cer 36:0;3	21.2135	20.7813	20.7674	19.9638
Cer 36:1;2	20.6252	20.6822	20.7262	21.1774
Cer 36:1;3	11.9844	11.3213	11.665	11.0266
Cer 36:2;2	17.3068	16.9854	15.3064	16.539
Cer 38:0;2	3.1173	3.1992	3.2313	3.1713
Cer 38:1;2	13.3047	13.2691	13.0451	12.8807
Cer 38:1;3	11.1241	11.135	11.0258	10.5906
Cer 38:2;3	3.0078	3.8342	4.0688	3.4172
Cer 40:0;2	1.9647	2.0437	1.8044	1.8532
Cer 40:1;2	6.8724	6.6368	6.8381	6.5532
Cer 40:1;3	7.8441	8.0568	8.3393	7.6998
Cer 40:2;2	6.57	6.3845	6.4007	6.5179
Cer 40:2;3	3.2651	3.2887	6.7916	3.082
Cer 42:0;2	1.5351	1.6123	1.5029	0
Cer 42:1;2	5.7252	5.7944	5.0284	4.8309
Cer 42:2;2	4.9031	4.9457	4.4491	4.184
Cer 44:0;2	0	0	0	0.1869
Cer 44:1;2	0	0	0	0
Cer 44:2;2	1.2525	1.2776	1.3853	1.2979
Cer 46:1;2	2.0374	1.9581	0	0
Cer 46:2;2	0.7053	0.8833	0	0
DAG 20:0+NH4	2.4029	3.836	3.6915	3.8183
DAG 22:0+NH4	1.6538	4.2326	4.612	3.8946
DAG 24:0+NH4	5.1484	7.0028	5.4586	5.537
DAG 24:1+NH4	7.2328	2.8644	5.7	5.2054
DAG 26:0+NH4	2.2861	2.1065	1.7961	2.0559
DAG 26:1+NH4	5.6333	6.3042	6.6407	6.4774
DAG 28:0+NH4	6.5853	6.3626	6.6555	6.4396
DAG 28:2+NH4	18.9509	21.5234	16.8801	19.6489
DAG 28:3+NH4	4.1469	3.9589	3.9756	4.2678
DAG 30:0+NH4	0	12.892	12.5966	12.0087
DAG 30:2+NH4	0	0	0	6.1582
DAG 30:5+NH4	2.6992	2.4035	2.4903	2.2362
DAG 32:0+NH4	14.8018	14.3248	15.0484	14.0744
DAG 32:4+NH4	0	0	0	0
DAG 32:5+NH4	0	0.0213	0.093	0
DAG 34:0+NH4	9.1323	8.8757	0	8.6884
DAG 34:4+NH4	0	0	0	0.6297
DAG 34:5+NH4	5.039	5.1545	1.9458	1.0028
DAG 36:0+NH4	0	0	9.6132	8.2603
DAG 36:4+NH4	2.1633	0	2.2435	2.0672
DAG 36:5+NH4	0.7259	0	0	0
DAG 36:6+NH4	8.6658	0	0	0
DAG 38:4+NH4	4.0381	4.5714	4.7641	4.425
DAG 38:5+NH4	6.8195	6.3153	5.5724	5.9716
DAG 38:7+NH4	10.9955	10.7791	10.7576	10.4111
DAG 40:10+NH4	10.1018	11.5607	6.7221	8.0544
DAG 40:4+NH4	6.761	6.4299	7.5991	5.6582
DAG 40:5+NH4	0	0	0	0
DAG 40:6+NH4	10.7253	11.4408	9.825	9.9889
DAG 40:7+NH4	7.5418	6.138	6.3075	5.8313
DAG 40:8+NH4	6.1969	6.6109	6.7962	6.4335
DAG 40:9+NH4	189.323	185.952	221.752	219.126
DAG 42:1+NH4	0	0	6.6157	6.2906
DAG 42:2+NH4	2.5934	0	2.812	2.6195
DAG 42:3+NH4	0	0	0	0
DAG 42:4+NH4	4.9754	4.6631	4.7086	4.5227
DAG 42:5+NH4	13.7484	13.1842	14.2764	13.1859
DAG 42:6+NH4	15.5088	15.0531	15.8796	15.0921
DAG 42:7+NH4	8.8873	8.7391	8.6966	8.4452
DAG 42:8+NH4	7.9108	7.0035	6.8392	7.4753
DAG 42:9+NH4	0	1.9034	0	0
DAG 44:0+NH4	7.5206	7.2185	7.455	7.455
DAG 44:1+NH4	8.103	8.1403	8.3696	8.0184
DAG 44:3+NH4	1.7781	1.786	1.964	1.866
DAG 44:4+NH4	1.9481	2.1112	2.0891	1.8669
DAG 44:5+NH4	2.0073	2.384	3.0095	1.8972
DAG 44:7+NH4	8.3762	7.9823	0	0
DAG 44:8+NH4	8.95	9.0031	9.2256	8.688
DAG 46:0+NH4	12.1538	12.182	12.0855	11.8136
DAG 46:1+NH4	16.3166	16.5855	16.4671	15.9324
DAG 46:2+NH4	8.5444	8.6591	8.1026	8.6396
DAG 46:4+NH4	2.0393	1.9903	2.0309	1.9341
DAG 46:6+NH4	2.5459	2.5637	2.6972	2.5541
DAG 48:0+NH4	14.6912	14.7602	14.7518	14.3094
DAG 48:1+NH4	25.3316	25.4862	24.9666	24.3909
DAG 48:2+NH4	16.592	16.6527	16.4292	15.877
DAG 48:6+NH4	1.1629	1.2169	1.3197	1.1995
HexCer 28:1;2	4.465	4.1862	7.365	4.2105
HexCer 30:2;2	11.0504	12.0196	9.351	10.6738
HexCer 32:0;2	2.1997	2.1938	2.35	2.0684
HexCer 32:1;2	21.408	22.8657	19.6656	20.4118
HexCer 32:2;2	6.3871	6.2025	6.221	6.3002
HexCer 34:1;2	9.6552	9.6055	9.3903	9.2493
HexCer 34:2;2	8.5402	8.4537	6.0361	8.0403
HexCer 36:1;2	6.7117	6.2342	7.8173	6.1505
HexCer 36:2;2	9.846	7.9126	8.0798	7.2819
HexCer 36:2;3	10.2034	10.0714	9.258	8.9238
HexCer 38:0;2	1.0735	0	2.145	0
HexCer 38:1;2	5.4117	5.3221	0	0
HexCer 40:0;2	0	0	0	0.4171
HexCer 40:1;2	2.8101	2.9349	2.7319	2.7516
HexCer 42:1;2	0.8205	0.8954	0.6558	0.9224
HexCer 42:2;3	2.7467	2.7705	2.879	4.4842
HexCer 44:0;2	3.4178	3.3699	0	1.8843
HexCer 44:1;2	5.8806	5.7121	5.8007	5.5556
HexCer 44:2;3	2.2011	0.6175	0.856	2.4626
HexCer 46:1;2	3.8211	0	3.3734	3.0922
HexCer 46:2;2	4.3777	0	4.675	4.7336
LPC 10:0	4.9182	4.9933	3.7273	3.9328
LPC 12:0	9.8212	10.3874	4.109	4.4091
LPC 14:0	8.2874	7.9835	6.1595	6.2605
LPC 14:1	16.1451	16.6188	12.2309	12.7362
LPC 16:0	12.4978	12.4586	6.7096	7.2042
LPC 16:1	15.8596	16.4897	12.0609	13.2096
LPC 18:1	16.5985	16.6851	13.169	14.0845
LPC 18:2	22.3563	23.2019	16.5469	17.9474
LPC 18:3	10.5052	10.7631	5.9843	6.9549
LPC 20:2	12.9847	13.4138	10.3426	11.1438
LPC 20:3	14.5924	15.0177	12.7075	13.7319
LPC 20:4	9.7714	8.8783	8.0904	6.898
LPC 20:5	6.7398	6.9245	5.1093	5.3923
LPC 22:2	12.8006	12.9	8.7284	9.4002
LPC 22:4	5.8442	6.3969	4.8905	4.7916
LPC 22:6	11.8935	12.1023	8.8936	9.5174
LPE 10:0	0.6174	0.6778	0.4525	0.4768
LPE 12:0	2.4949	0	0	0
LPE 14:0	4.1768	11.2132	6.4455	7.2489
LPE 14:1	7.9269	8.2307	5.905	6.4327
LPE 16:0	7.4881	7.5746	5.7396	6.1329
LPE 16:1	43.5173	44.0919	32.3375	34.5209
LPE 18:0	13.0801	12.8041	12.5873	7.1613
LPE 18:1	9.7065	14.0474	10.2817	10.9624
LPE 18:2	13.122	14.8676	9.907	10.6044
LPE 18:3	26.2951	27.708	19.8391	21.8123
LPE 20:0	10.4093	10.5084	8.7724	9.3983
LPE 20:1	13.771	14.2748	10.6165	11.6284
LPE 20:2	12.2803	12.8077	9.7231	10.2995
LPE 20:3	12.392	12.3022	10.1438	10.6756
LPE 20:4	6.4734	8.3693	6.8373	7.172
LPE 20:5	9.7921	9.5406	5.159	5.4841
LPE 22:0	1.9871	2.0799	1.9722	2.0459
LPE 22:1	13.0745	13.4455	10.0768	10.4242
LPE 22:2	12.7481	13.0106	10.1493	10.9084
LPE 22:4	5.3035	5.3139	3.5177	3.8036
LPE 22:6	19.3621	19.1207	13.9671	14.4402
LPE 24:0	2.8991	2.7621	2.8739	2.7918
LPE 24:1	0.8953	2.8738	2.3846	2.9982
LPE 26:0	0	1.4412	0	0
LPG 10:0	2.6267	2.6224	2.4506	2.6041
LPG 12:0	4.9021	3.8795	4.6998	1.8988
LPG 14:0	3.58	3.9207	4.4435	4.7319
LPG 14:1	2.3517	2.689	2.1919	2.3289
LPG 16:0	2.1657	3.9769	1.8963	1.8534
LPG 16:1	2.5201	2.77	2.1748	0
LPG 18:0	4.3612	4.7014	3.8701	4.0295
LPG 18:1	3.2764	4.6419	2.7835	3.8482
LPG 18:2	3.8542	3.7515	3.1957	3.2675
LPG 18:3	1.6379	1.3151	1.4595	1.3222
LPG 20:0	2.4164	2.5999	2.1489	2.2761
LPG 20:1	2.9665	2.8821	2.2038	2.3292
LPG 20:2	3.2044	3.2694	2.8841	3.0323
LPG 20:3	3.7458	3.7414	2.9601	3.0667
LPG 20:4	2.997	3.037	1.8886	1.961
LPG 20:5	4.7291	5.0003	3.4214	4.3929
LPG 22:0	2.5425	2.5488	2.1819	1.963
LPG 22:1	2.6552	3.0091	2.4252	2.5017
LPG 22:2	4.8	4.9497	2.3952	2.8526
LPG 22:4	2.7385	1.0213	2.7667	3.0209
LPG 22:6	2.6316	2.7924	2.3323	2.2483
LPG 24:0	0.4308	0.9062	0.8657	0.2876
LPG 24:1	1.097	1.1694	0.8718	0.8549
LPI 10:0	3.0216	1.9866	3.5242	3.5068
LPI 12:0	0	2.7251	0	0
LPI 14:0	3.4162	3.5562	0	0
LPI 14:1	2.6458	2.7709	2.3542	0.3565
LPI 16:0	2.4196	2.4793	2.0884	1.9745
LPI 16:1	0	0	2.2558	0
LPI 18:0	2.4497	2.0862	2.15	2.1692
LPI 18:1	2.651	2.6202	1.9568	2.1977
LPI 18:2	6.1237	2.4605	1.8636	2.0792
LPI 20:0	2.3713	2.4096	0	0
LPI 20:1	2.1701	2.2481	1.7485	1.7723
LPI 20:3	2.9702	3.53	3.2566	0
LPI 20:5	1.4452	1.5147	1.7288	1.6381
LPI 22:0	1.3134	1.5542	1.1811	1.3021
LPI 22:1	2.1202	2.2412	1.7418	1.8788
LPI 22:2	1.91	1.8351	1.6169	1.6538
LPI 22:4	0	0	0	1.2833
LPI 24:1	1.8068	1.4794	1.4905	1.384
LPS 10:0	0	1.8841	0	1.4254
LPS 12:0	0	0	0	1.8002
LPS 14:0	3.5251	3.482	3.0843	3.2422
LPS 16:0	7.7788	8.2719	5.8606	5.5078
LPS 20:0	8.8311	8.5087	6.307	6.7642
LPS 20:2	16.3574	16.9329	12.9983	13.5459
LPS 20:5	0	0	0	0
LPS 22:0	12.2615	12.335	9.4112	9.9442
LPS 22:1	13.8363	14.2916	10.8566	11.32
LPS 22:4	0	0	3.2968	0
LPS 24:0	8.9672	9.2023	6.7772	7.1745
LPS 24:1	22.1887	22.6081	15.7843	16.9184
LPS 26:0	0	0	0.9701	0.791
MAG 10:0+NH4	1.1048	1.0562	1.0227	0.8906
MAG 12:0+NH4	11.043	10.816	8.0182	8.2731
MAG 14:0+NH4	2.2584	1.841	1.7409	1.6352
MAG 14:1+NH4	1.6252	1.6075	0	1.2077
MAG 16:0+NH4	2.0277	1.879	1.8616	1.8211
MAG 16:1+NH4	1.2798	1.1749	1.1732	1.1807
MAG 18:0+NH4	0	0	3.4738	4.064
MAG 18:1+NH4	5.7671	3.0865	3.9955	3.9152
MAG 18:2+NH4	0	0	2.9602	2.9738
MAG 18:3+NH4	1.952	1.8588	1.629	1.7698
MAG 20:0+NH4	3.6349	3.185	2.6738	2.2529
MAG 20:1+NH4	9.7043	9.0893	9.3168	9.1617
MAG 20:2+NH4	3.307	3.2442	3.8374	3.8231
MAG 20:3+NH4	0.609	0.5907	0.3519	0.4213
MAG 20:4+NH4	1.5431	1.542	2.0431	1.9345
MAG 20:5+NH4	2.0293	2.1095	1.9325	2.2592
MAG 22:0+NH4	2.7536	2.5428	2.893	2.6203
MAG 22:1+NH4	6.7789	6.6474	6.8759	6.7213
MAG 22:2+NH4	25.8879	25.8503	25.343	24.4646
MAG 22:4+NH4	149.507	159.247	131.627	148.277
MAG 24:0+NH4	9.8559	9.5503	9.7414	9.2881
MAG 24:1+NH4	2.0951	2.0688	2.0145	1.9365
MAG 26:0+NH4	2.4477	2.0513	1.794	1.7936
PC 24:0	0	0	0.1823	0
PC 24:1	11.266	0	0	0
PC 26:1	0	0	2.2217	2.4048
PC 28:1	0	0	3.3641	3.3079
PC 28:2	6.2579	6.1369	5.8122	5.8273
PC 30:0	29.8307	30.6712	32.0899	32.4441
PC 30:1	1.5896	1.4542	1.4057	0
PC 30:2	23.5643	23.929	0	0
PC 30:5	15.1958	15.3864	12	12.3604
PC 32:0	36.1155	36.692	41.4408	41.6476
PC 32:1	213.906	217.157	203.67	227.918
PC 32:2	12.8498	12.8573	11.0365	11.242
PC 32:3	0	1.414	0	0
PC 32:4	0	0.4875	0	0
PC 32:5	5.6235	5.656	5.1116	4.7307
PC 32:6	10.9111	12.4354	8.7258	9.862
PC 34:0	14.2982	15.0952	15.8732	14.8246
PC 34:1	131.121	135.799	127.654	130.349
PC 34:2	0	0	21.3689	21.2249
PC 34:3	3.6534	3.9414	7.4044	7.0735
PC 34:4	4.482	5.1442	4.3592	3.8832
PC 34:5	9.4224	7.3757	7.5396	7.1532
PC 34:6	7.493	7.9368	7.362	7.0589
PC 36:0	4.6374	4.34	0	4.3806
PC 36:1	43.8216	45.0791	48.4804	45.3354
PC 36:2	45.5957	46.4838	40.2628	39.6317
PC 36:3	13.2036	13.3476	10.1813	10.0492
PC 36:4	17.1561	17.484	13.4541	13.7219
PC 36:5	6.0836	6.3638	4.9855	5.0053
PC 38:1	3.1116	4.2945	4.3934	2.996
PC 38:2	3.1339	3.5916	3.639	3.5365
PC 38:3	5.2186	5.1425	4.9969	4.6284
PC 38:4	21.6816	21.727	18.7006	19.8529
PC 38:5	14.725	14.6286	10.4888	10.1312
PC 40:1	3.9867	3.9494	3.5707	0
PC 40:2	0	0	0	2.549
PC 40:4	3.0401	3.1069	2.9749	2.7243
PC 40:5	5.469	5.5722	5.1134	4.9145
PC 40:6	11.717	11.5776	13.2543	13.1862
PC 42:5	33.688	32.0839	70.5933	67.7144
PC 42:6	2.9249	3.2222	2.9902	3.0354
PC 44:5	4.0387	4.0519	3.1972	4.531
PC 44:6	0	0.6669	0	0
PC 46:0	3.4081	3.324	2.7964	2.6322
PC 48:2	3.0056	2.1053	2.292	5.6887
PC 48:4	0	0	5.3192	4.017
PE 20:0	16.2383	16.2162	11.6945	11.6533
PE 22:0	10.2258	10.3456	7.865	8.2708
PE 24:1	11.7471	11.8172	8.1123	8.909
PE 26:0	0	0	0	0
PE 26:1	3.9349	0	4.7352	2.8063
PE 28:1	5.6044	11.0725	5.5069	6.1885
PE 28:2	7.5273	7.5702	7.2031	7.5151
PE 28:3	0	6.5404	0	5.882
PE 30:0	10.7644	10.496	0	0
PE 30:3	26.7861	27.4991	19.9308	22.4189
PE 30:5	12.1267	12.046	9.737	10.1074
PE 32:0	6.8377	7.0819	6.7551	7.0697
PE 32:2	238.951	246.418	199.417	233.674
PE 32:4	0.9968	1.0123	0	0
PE 32:5	8.1227	9.0766	6.4205	6.7647
PE 32:6	1.2605	0	0	0
PE 34:0	24.5718	24.5466	26.3832	25.8415
PE 34:1	10.1525	9.9183	9.7129	9.3601
PE 34:2	18.0241	18.5947	15.2738	16.1432
PE 34:6	12.0418	12.3622	4.2935	4.5463
PE 36:0	0	18.1481	12.2234	10.8895
PE 36:1	35.2248	35.7977	39.3773	36.1503
PE 36:2	13.624	13.474	12.0011	12.5156
PE 36:4	1.4718	1.9534	1.7794	1.7481
PE 36:5	1.4625	0	0	0
PE 36:6	0	0	0	0
PE 38:0	106.058	107.855	140.64	148.477
PE 38:1	18.1911	18.5478	16.245	16.9429
PE 38:2	11.6376	11.5867	0	9.883
PE 38:3	7.1782	7.1329	6.5995	6.4111
PE 38:4	18.5072	18.3406	16.2318	16.0408
PE 38:5	14.8837	14.7597	11.3327	12.1149
PE 38:6	1.2845	0	0.9667	0
PE 40:1	4.6295	4.5446	4.77	4.5481
PE 40:2	3.9426	4.0653	4.0237	3.7106
PE 40:3	7.5281	7.4478	7.004	6.5841
PE 40:4	8.2113	8.0312	7.4092	7.1735
PE 40:5	8.6071	8.7941	7.3292	6.9325
PE 42:1	2.6919	2.6697	2.8251	2.8222
PE 42:2	2.078	2.2123	2.2763	3.1185
PE 42:4	0	0	0	3.0137
PE 44:1	2.1772	1.8385	2.2596	2.1189
PE 44:2	3.6894	0	2.7286	2.3826
PE 44:3	5.3411	4.9861	5.0688	4.8115
PE 44:5	0	0	0	2.1027
PE 46:0	0	4.7999	0	0
PE 46:1	3.7926	3.6786	0	0
PE 48:0	3.6965	4.1266	0	3.9299
PE 48:1	2.9073	3.0722	0	2.832
PG 20:0	2.9923	3.2445	2.5321	2.7392
PG 22:0	2.6945	2.7033	1.9719	2.1647
PG 24:0	2.2318	2.2381	1.7253	1.9403
PG 24:1	2.8363	2.8728	2.5564	2.6146
PG 26:0	0	4.2763	0	0
PG 26:1	2.3581	2.2501	1.1867	1.1006
PG 28:2	96.6835	99.9054	118.743	119.312
PG 28:3	2.4793	2.1993	1.9702	2.0877
PG 30:1	2.8598	5.3952	2.1863	0
PG 30:2	2.2994	2.3209	1.7327	1.7846
PG 30:3	1.8574	0	1.332	0
PG 30:4	2.0608	1.8619	0	0
PG 30:5	5.9073	5.9223	6.3821	6.6008
PG 32:0	0	0	0.1846	0
PG 32:1	0	0	0.2992	0
PG 32:2	0	0	0	0.1974
PG 32:5	2.4384	2.5331	1.9152	1.9392
PG 32:6	0.9125	1.0605	2.0249	2.1471
PG 34:0	0.5951	0.6327	0.4452	0.5321
PG 34:1	0.9077	0	0	0
PG 34:5	0.9765	1.1255	0	0
PG 34:6	1.1195	1.003	0.4448	0.8003
PG 36:3	0	0.2286	0	0
PG 36:6	1.3019	1.1694	1.148	1.0403
PG 38:2	1.0703	1.2532	0	0
PG 38:3	0	0	0	0
PG 38:4	0	0	0	0
PG 38:5	0	0	0	0
PG 40:1	1.4244	1.4788	1.4738	1.4994
PG 40:2	0.2866	0.1674	0.0985	0.3919
PG 40:5	0	0	0	0
PG 42:1	0.5322	0.3674	0.3828	0.1039
PG 42:2	0.7169	0.8346	0.7375	0.5937
PG 42:3	0.7118	0.4437	0.4988	0.4741
PG 42:4	0.7912	0.758	0	0
PG 42:5	0	0	0.1403	0
PG 44:4	0	0.0551	0.1202	0
PG 44:5	0.0569	0.2447	0.2197	0
PG 46:0	1.2027	1.2291	0	0
PG 46:3	0	0	0	0
PG 46:4	0	0.6713	0	0
PG 46:6	0	0	0.1387	0.2471
PG 48:0	2.6691	2.1412	2.0996	1.9851
PG 48:2	1.8273	1.8547	0	0
PG 48:4	0.1078	0.2987	0	0.1411
PI 20:0	0	0	1.6896	1.8645
PI 22:0	1.5179	1.6591	1.2899	1.3816
PI 24:0	1.6301	1.7173	1.3326	1.6125
PI 24:1	1.6776	1.726	1.1793	1.4326
PI 26:0	1.0997	1.2678	1.1742	1.1267
PI 26:1	1.315	1.1599	0.9507	1.0435
PI 28:0	0.5551	0	0.742	0.5838
PI 28:1	1.3818	0	2.8852	2.9946
PI 28:2	1.2972	1.3277	1.2793	1.3117
PI 28:3	1.3788	0.7624	1.2199	2.2945
PI 30:1	0.8886	1.0567	0.4852	0.4858
PI 30:2	1.0575	1.2592	1.0764	0.9363
PI 30:3	1.363	1.3401	0	0
PI 30:4	1.2807	1.2821	1.0979	1.1235
PI 30:5	0.8781	0.9317	2.8565	0.8313
PI 32:2	1.0858	1.0819	0.8581	0.7347
PI 32:3	0.9596	1.0128	0.821	0.8374
PI 32:4	0.6744	0.8072	0.5116	0.5378
PI 32:5	0.8396	0.7634	0.7197	0.8145
PI 32:6	0.577	0.598	0.5968	0.4865
PI 34:0	0.4956	0.5093	0.5416	0.5728
PI 34:1	1.0345	1.0127	0.7533	0.5831
PI 34:3	0.9479	0.8854	0.7541	0.7128
PI 34:4	0.8121	0.8008	0.8086	0.6185
PI 34:5	0	0	0.6136	0
PI 34:6	0.7095	0	0	0
PI 36:2	0.2208	0.3482	0.3173	0
PI 36:3	0	0	0.61	0
PI 36:4	0.6317	0.8265	0.5234	0.6477
PI 36:5	0.4539	3.009	0.4616	0.5736
PI 36:6	0	0.4445	0.3758	0.7386
PI 38:1	0	0	0	0
PI 38:2	0	0	1.0776	0
PI 38:4	0	0	0	0
PI 38:5	0	0.4808	1.1977	1.3035
PI 38:6	0	0.6841	0.3652	0
PI 40:1	0	0	0	1.0843
PI 40:2	0	0.3819	0	0.5389
PI 40:3	0	0	0	0.1708
PI 40:6	0	0.4838	0.4733	0.476
PI 42:1	0.8586	0	0.9764	1.9891
PI 42:3	0	0	0	0.1102
PI 42:4	0	0	0	0
PI 42:5	0	0.4226	0.944	0.418
PI 44:2	0	0	0	0.0767
PI 44:5	0	0	0	0
PI 46:1	0	0	0	0.0793
PI 46:3	0	0	0	0
PI 46:4	0.8863	0	0.4561	0.4963
PI 46:6	0	0	0	0
PI 48:0	1.0757	0.9954	0	0
PI 48:2	0.7336	0	0	0
PI 48:6	0	0	0	0.2782
PS 22:0	0	11.2454	8.4587	8.8212
PS 24:0	14.4422	14.6153	11.4071	11.8798
PS 24:1	12.8502	12.1496	8.9238	9.7591
PS 26:0	14.6571	14.9203	9.8945	10.6143
PS 26:1	9.4035	9.5353	7.3479	9.7847
PS 28:1	6.4997	6.8078	0	0
PS 28:2	7.0665	6.568	3.8897	4.035
PS 28:3	5.7472	5.7564	4.3313	4.5031
PS 30:1	7.1568	6.9467	4.4011	4.8154
PS 30:2	5.1917	5.4082	4.0421	4.3009
PS 30:3	3.936	3.8609	2.9077	3.0933
PS 30:4	5.5664	5.6712	4.1476	4.2017
PS 30:5	9.8349	9.9407	7.5667	7.7756
PS 32:2	0	0	0	4.7224
PS 32:4	6.6	6.6114	4.8082	5.0349
PS 32:5	7.1041	7.278	5.1873	5.4254
PS 32:6	7.6333	7.9315	5.7584	6.0471
PS 34:2	6.6283	6.2106	4.8784	4.9178
PS 34:4	0	0	0	5.6907
PS 34:5	8.1855	7.9625	5.7553	6.0695
PS 34:6	6.3421	6.3016	4.7666	5.2771
PS 36:0	4.1059	3.6361	3.427	2.5495
PS 36:1	22.463	30.6156	22.4394	31.434
PS 36:5	5.5987	5.7109	4.1685	4.4377
PS 36:6	5.711	5.7364	4.4003	4.656
PS 38:0	62.3805	61.3384	101.138	106.951
PS 38:1	4.7437	4.9821	4.3416	4.5973
PS 38:2	1.2786	0.8234	0.6304	0.9227
PS 38:3	1.2525	1.2202	1.3397	1.2335
PS 38:4	3.6731	3.585	3.3185	3.386
PS 40:0	0	8.9942	9.2904	9.627
PS 40:2	0	0	0	0
PS 40:4	2.9808	0	0	0
PS 40:5	0	0	5.1321	5.4148
PS 40:6	0	0	0	4.0991
PS 42:4	0	0	0	0
PS 44:1	1.76	0	0	0
PS 44:2	0	0	0	0.5384
PS 44:3	0	0	0	0
PS 44:4	0.3039	0	0	0
PS 44:5	0	0	0	0.3174
PS 46:0	0.8064	0.8835	0.7381	0.7904
PS 46:3	0	0.3457	0.6354	0.3788
PS 46:4	0.458	0.2503	0.4786	0.425
PS 46:5	3.6157	4.1817	5.0604	4.278
PS 48:2	0	0	0	1.8776
PS 48:4	8.5896	11.8326	19.6373	20.4039
SM 28:1;2	5.2857	5.1353	6.6386	6.6405
SM 30:0;2	2.4128	2.5019	0	0
SM 32:0;2	4.313	5.0481	7.3469	0
SM 32:0;3	1.1379	1.217	1.106	3.4854
SM 32:1;2	3.4345	3.5456	3.6354	3.4775
SM 34:0;2	9.4123	9.8882	9.8878	9.3853
SM 34:1;2	27.1811	27.5397	27.7103	27.8488
SM 34:1;3	2.2662	2.4483	2.3092	2.1829
SM 34:2;2	6.2682	6.4433	4.7898	5.3881
SM 36:0;2	0	0	0	1.9209
SM 36:0;3	2.2693	0.2041	2.9436	1.781
SM 36:1;2	2.6688	2.8489	0	2.7411
SM 36:1;3	17.7936	0	0	0
SM 36:2;2	3.1409	3.2917	2.4803	2.9773
SM 36:2;3	2.8436	2.9675	2.9755	2.6012
SM 38:1;2	1.6583	2.5235	0	1.9415
SM 38:2;2	3.6483	0	2.2931	2.2425
SM 38:2;3	1.5775	1.5355	6.7	1.5186
SM 40:0;3	1.4682	1.584	1.6022	1.8776
SM 40:1;3	1.4011	1.4075	2.4326	1.878
SM 40:2;2	2.8293	2.8189	2.925	2.6917
SM 40:2;3	3.8977	3.6931	3.7505	3.5101
SM 42:0;2	2.8699	2.3696	2.6219	2.6886
SM 42:1;2	11.0591	8.8267	8.894	10.513
SM 42:1;3	2.2948	2.421	2.5536	2.1605
SM 42:2;2	18.2287	18.3406	17.9036	16.7603
SM 42:2;3	2.6642	2.5413	2.5829	2.3187
SM 44:0;2	2.2524	1.7041	1.9901	3.8765
SM 44:0;3	0.4308	0.6755	1.7206	1.9121
SM 44:1;2	2.9674	2.8624	4.8778	3.6322
SM 44:1;3	1.184	1.0458	1.0604	1.0864
SM 44:2;2	3.4079	3.4048	3.6777	3.4824
SM 44:2;3	1.2074	3.2567	1.5474	1.5511
SM 46:0;2	2.1862	2.2564	2.3082	2.0758
SM 46:1;2	1.9078	4.6769	1.9142	1.949
SM 46:2;2	1.2896	0	1.0827	1.1893
TAG 30:0+NH4	16.4657	16.4631	15.2542	14.1214
TAG 32:0+NH4	7.7559	8.1419	8.2602	7.5694
TAG 34:0+NH4	6.1237	5.8807	6.1886	5.848
TAG 34:1+NH4	10.7578	10.8036	10.5316	9.8604
TAG 36:1+NH4	9.0219	8.8542	8.5955	8.145
TAG 38:3+NH4	2.0719	1.8	4.2569	3.8818
TAG 40:2+NH4	2.45	2.4608	2.821	2.5273
TAG 40:3+NH4	0	0	0	0
TAG 40:4+NH4	0	0	0	0
TAG 42:4+NH4	0	2.7938	3.3577	0
TAG 44:0+NH4	10.421	10.631	10.4703	10.2595
TAG 44:1+NH4	11.5486	11.6682	11.646	11.3084
TAG 44:2+NH4	6.9436	7.0805	6.8781	6.8448
TAG 44:4+NH4	1.1966	0	1.9176	1.2072
TAG 46:0+NH4	15.6377	15.9582	15.846	15.3139
TAG 46:1+NH4	24.3421	24.4674	24.566	23.6475
TAG 46:2+NH4	16.4386	15.5824	17.0498	15.2274
TAG 46:4+NH4	0	1.9292	0	0
TAG 48:0+NH4	14.2115	14.4289	14.9944	14.873
TAG 48:1+NH4	33.2211	32.9959	34.4283	32.8236
TAG 48:2+NH4	24.0723	23.6326	23.8233	22.6377
TAG 48:3+NH4	8.4253	8.4618	8.4042	8.2171
TAG 48:5+NH4	0	0	0	0
TAG 50:2+NH4	29.8217	26.9858	27.8761	26.4852
TAG 50:3+NH4	0	11.4214	11.233	10.6576
TAG 52:0+NH4	0	0	2.1985	6.7825
TAG 52:1+NH4	13.9264	13.7522	15.6006	14.5849
TAG 52:2+NH4	30.4507	30.8641	34.3039	31.4254
TAG 52:3+NH4	13.8014	13.4461	14.4845	13.5857
TAG 52:4+NH4	5.4381	4.4958	5.2789	4.9392
TAG 52:5+NH4	4.072	0	4.1444	3.7019
TAG 54:1+NH4	3.5682	3.6244	3.8762	3.6739
TAG 54:2+NH4	8.3102	8.1394	8.9208	8.3115
TAG 54:3+NH4	12.4647	12.4305	13.3105	12.0544
TAG 54:4+NH4	7.5699	7.5028	7.8949	7.5416
TAG 54:5+NH4	6.6698	6.5352	6.3917	5.9177
TAG 54:6+NH4	5.0482	7.4199	6.1955	6.0387
TAG 54:7+NH4	0	0	5.1333	3.9419
TAG 56:0+NH4	0	0	0	0
TAG 56:1+NH4	1.9002	1.8665	3.1692	3.1708
TAG 56:2+NH4	2.8143	2.7527	2.8957	2.7722
TAG 56:4+NH4	2.685	3.3941	3.6452	3.452
TAG 56:5+NH4	5.6274	5.5525	5.4437	5.4134
TAG 56:6+NH4	8.6991	8.2886	8.3808	8.1501
TAG 56:7+NH4	4.0968	4.8603	4.1022	5.5051
TAG 56:8+NH4	0	4.8521	0	1.8308
TAG 56:9+NH4	3.7558	3.7205	0	0
TAG 58:1+NH4	0	2.459	0	0
TAG 58:11+NH4	2.0908	2.0221	0	0
TAG 58:2+NH4	1.5582	1.554	1.7865	1.7058
TAG 58:6+NH4	4.6866	4.6179	4.6503	4.1896
TAG 58:8+NH4	4.0935	4.6053	4.353	0
TAG 60:0+NH4	0	0.9041	0.7681	0
TAG 60:1+NH4	0.5931	0.5183	0.9624	0.4212
TAG 60:10+NH4	4.366	3.6534	2.5682	2.4715
TAG 60:11+NH4	0	2.8548	2.1433	1.989
TAG 60:12+NH4	2.1455	2.0798	2.3122	2.1421
TAG 60:2+NH4	0	0	0	3.6828
TAG 60:4+NH4	3.387	2.9343	0	0
TAG 60:5+NH4	0	1.6445	0	0
TAG 60:7+NH4	1.8801	1.8649	1.8845	1.6851
TAG 60:8+NH4	2.6697	2.5001	2.2014	2.3673
TAG 60:9+NH4	1.858	1.8896	0	1.4559
TAG 62:0+NH4	0	0	0	0
TAG 62:10+NH4	0	0	0	2.3956
TAG 62:6+NH4	1.8396	0	1.8193	1.6831
TAG 62:7+NH4	2.1728	1.9641	2.0574	1.9291
TAG 62:8+NH4	1.7965	1.5626	1.5447	1.4494
TAG 62:9+NH4	3.53	2.957	2.1137	2.0647
TAG 64:0+NH4	0	0	0.4183	0
TAG 64:1+NH4	0	0.5265	0	0
TAG 64:11+NH4	0	0	0	2.1776
TAG 64:12+NH4	2.8128	0	0	1.6435
TAG 64:4+NH4	0.9587	0.9022	0.8732	0
TAG 64:8+NH4	1.974	1.5197	1.5639	1.4412
TAG 64:9+NH4	1.4469	1.4256	1.2411	0
TAG 66:10+NH4	0.9488	0.8407	0.8494	0.8493
TAG 66:11+NH4	0.7646	0.6654	0.9294	0.9991
TAG 66:12+NH4	1.5573	1.5919	0	0
TAG 66:4+NH4	0	0	0	0
TAG 66:6+NH4	1.255	1.1329	1.0936	1.065
TAG 66:7+NH4	1.754	1.8207	2.0632	1.6959
TAG 66:8+NH4	1.463	1.8042	0.8662	1.4442
TAG 66:9+NH4	1.5377	1.4872	0.1893	1.429
TAG 68:1+NH4	0.5234	0.6472	0	0
TAG 68:10+NH4	0.7971	0.9039	0.6276	0.5564
TAG 68:11+NH4	0.8129	0.7742	1.1345	1.0388
TAG 68:12+NH4	1.5703	1.5436	1.5249	1.4433
TAG 68:5+NH4	1.3131	1.2064	0	1.1708
TAG 68:6+NH4	1.2306	1.1445	1.0754	0.9279
TAG 68:7+NH4	1.5874	1.3357	1.5807	1.2264
TAG 68:8+NH4	1.1554	1.1089	1.254	1.4792
TAG 68:9+NH4	1.0481	0.8244	1.0237	1.0008
TAG 70:10+NH4	0.8377	0.6781	0.6813	0.6273
TAG 70:12+NH4	2.144	2.1496	2.4397	1.8239
TAG 70:5+NH4	0	0	1.5174	0
TAG 70:6+NH4	1.3057	1.3414	1.1331	1.291
TAG 70:7+NH4	1.2897	1.3804	1.404	1.2483
TAG 70:8+NH4	1.279	1.0654	1.3263	1.2179
TAG 72:1+NH4	0.8009	0	0	0.6596

## Sheet: Supplemetary Table7
Table S7: lipids identified in IPSC by SMFinder
Lipid groups	Lipid name	chemical formula	mz	rt	Lipid Class	Category	ppm	MS2 score	MS2 FDR	IPSC_sample1 area	IPSC_sample1r area	IPSC_sample2 area	IPSC_sample2r area
zetaCarotene	zeta-Carotene	C40H60	558.502	21.94			0.4	0.37	0.002	1310	1480	1480	1500
Ursodeoxycholic acid	Ursodeoxycholic acid	C24H40O4	393.296	19.99		Sterol Lipids [ST]	7.6	0.52	0.004	1190	1110	1570	1290
TAG (18:2-18:2-18:2)	TAG (18:2-18:2-18:2)	C57H98O6	879.742	28.09	TAG	Glycerolipids [GL]	7.4	0.1	0.014	872	1190	1460	1420
TAG (18:1-18:2-18:2)	TAG (18:1-18:2-18:2)	C57H100O6	898.781	27.9	TAG	Glycerolipids [GL]	4.2	0.36	0.004	2470	4090	4430	4230
TAG (18:1-18:1-20:4)	TAG (18:1-18:1-20:4)	C59H102O6	907.769	29.12	TAG	Glycerolipids [GL]	5	0.36	0.002	1510	2320	3730	3540
TAG (16:1-18:2-18:2)	TAG (16:1-18:2-18:2)	C55H96O6	853.721	27.8	TAG	Glycerolipids [GL]	7.2	0.46	0.004	842	1100	1220	1210
TAG (15:0-18:1-18:2)	TAG (15:0-18:1-18:2)	C54H98O6	860.766	27.72	TAG	Glycerolipids [GL]	2.1	0.72	0.002	839	885	869	882
TAG (14:0-16:1-18:1)	TAG (14:0-16:1-18:1)	C51H94O6	820.734	26.92	TAG	Glycerolipids [GL]	4.9	0.9	0.002	4490	6060	6000	5790
TAG (10:0-16:0-18:2)	TAG (10:0-16:0-18:2)	C47H86O6	764.677	25.29	TAG	Glycerolipids [GL]	0.1	0.03	0.052	660	816	960	946
TAG 25:1/18:1/18:1	TAG (25:1/18:1/18:1)	C64H118O6	1000.92	36.47	TAG	Glycerolipids [GL]	5	0.79	0.002	580	826	1210	1120
TAG 20:1/18:1/22:6	TAG (20:1/18:1/22:6)	C63H106O6	959.8	30.11	TAG	Glycerolipids [GL]	4.7	0.95	0.002	323	396	516	456
TAG 20:1/18:1/22:5	TAG (20:1/18:1/22:5)	C63H108O6	978.842	29.88	TAG	Glycerolipids [GL]	5.4	0.35	0.016	615	974	1070	916
TAG 20:1/18:1/18:1	TAG (20:1/18:1/18:1)	C59H108O6	930.847	30.3	TAG	Glycerolipids [GL]	1.1	0.72	0.002	7350	14000	27200	23600
TAG 19:1/18:1/20:2	TAG (19:1/18:1/20:2)	C60H108O6	942.842	30.21	TAG	Glycerolipids [GL]	6.2	0.59	0.006	118	178	255	213
TAG 19:1/18:1/18:2	TAG (19:1/18:1/18:2)	C58H104O6	914.811	29.08	TAG	Glycerolipids [GL]	4.9	0.45	0.014	239	373	451	426
TAG 19:1/18:1/18:1	TAG (19:1/18:1/18:1)	C58H106O6	916.829	29.71	TAG	Glycerolipids [GL]	1.8	0.74	0.002	397	594	795	707
TAG 18:4/14:1/16:1	TAG (18:4/14:1/16:1)	C51H86O6	812.672	19.99	TAG	Glycerolipids [GL]	3.2	0.06	0.106	321	485	516	482
TAG 18:1/18:3/21:1	TAG (18:1/18:3/21:1)	C60H106O6	940.836	29.39	TAG	Glycerolipids [GL]	1.7	0.35	0.026	121	225	227	214
TAG 18:1/18:1/24:1	TAG (18:1/18:1/24:1)	C63H116O6	986.904	33.29	TAG	Glycerolipids [GL]	6.7	0.69	0.002	351	585	1070	957
TAG 18:1/18:1/22:2	TAG (18:1/18:1/22:2)	C61H110O6	956.856	31.08	TAG	Glycerolipids [GL]	3.4	0.96	0.002	2370	4020	5260	4580
TAG 18:1/18:1/22:1	TAG (18:1/18:1/22:1)	C61H112O6	958.87	31.31	TAG	Glycerolipids [GL]	3.4	0.66	0.002	1330	2710	4050	4060
TAG 18:1/18:1/20:3	TAG (18:1/18:1/20:3)	C59H104O6	909.784	30.08	TAG	Glycerolipids [GL]	7.7	0.34	0.018	822	1280	1780	1540
TAG 18:1/18:1/20:2	TAG (18:1/18:1/20:2)	C59H106O6	928.831	29.59	TAG	Glycerolipids [GL]	1.1	0.27	0.044	6730	13100	22600	20500
TAG 18:1/18:1/18:2	TAG (18:1/18:1/18:2)	C57H102O6	900.799	28.48	TAG	Glycerolipids [GL]	1.5	0.39	0.002	7840	14100	17400	16600
TAG 18:1/18:1/18:1	TAG (18:1/18:1/18:1)	C57H104O6	902.817	29.13	TAG	Glycerolipids [GL]	0.2	0.75	0.002	25900	49500	82900	79100
TAG 18:1/17:1/18:2	TAG (18:1/17:1/18:2)	C56H100O6	886.779	27.98	TAG	Glycerolipids [GL]	5.7	0.64	0.002	258	362	354	351
TAG 18:1/17:1/18:1	TAG (18:1/17:1/18:1)	C56H102O6	888.799	28.6	TAG	Glycerolipids [GL]	0.3	0.69	0.002	636	885	1020	985
TAG 18:1/14:0/18:3	TAG (18:1/14:0/18:3)	C53H94O6	844.733	26.7	TAG	Glycerolipids [GL]	4.3	0.18	0.034	680	948	994	935
TAG 18:0/16:0/18:1	TAG (18:0/16:0/18:1)	C55H104O6	878.81	29.44	TAG	Glycerolipids [GL]	4.9	0.83	0.002	5230	9120	20000	18600
TAG 16:1/18:1/22:6	TAG (16:1/18:1/22:6)	C59H98O6	903.734	27.85	TAG	Glycerolipids [GL]	8.9	0.95	0.002	204	282	298	283
TAG 16:1/18:1/18:2	TAG (16:1/18:1/18:2)	C55H98O6	872.765	27.57	TAG	Glycerolipids [GL]	3.6	0.54	0.002	2420	3910	4360	4130
TAG 16:1/18:1/18:1	TAG (16:1/18:1/18:1)	C55H100O6	874.784	28.03	TAG	Glycerolipids [GL]	0.6	0.6	0.002	11300	21100	25700	24500
TAG 16:1/16:1/18:1	TAG (16:1/16:1/18:1)	C53H96O6	846.75	27.17	TAG	Glycerolipids [GL]	1.7	0.59	0.002	3230	4750	5030	4660
TAG 16:1/16:1/16:1	TAG (16:1/16:1/16:1)	C51H92O6	818.719	26.41	TAG	Glycerolipids [GL]	1.9	0.71	0.002	1250	1550	1580	1580
TAG 16:1/14:0/17:1	TAG (16:1/14:0/17:1)	C50H92O6	806.719	26.5	TAG	Glycerolipids [GL]	1.9	0.7	0.002	1810	1980	1930	1920
TAG 16:0/20:4/22:2	TAG (16:0/20:4/22:2)	C61H106O6	935.799	30.31	TAG	Glycerolipids [GL]	7	0.96	0.002	653	888	1700	1510
TAG 16:0/20:4/22:2	TAG (16:0/20:4/22:2)	C61H106O6	952.828	29.34	TAG	Glycerolipids [GL]	3.8	0.39	0.022	1620	3010	3530	3200
TAG 16:0/18:3/24:2	TAG (16:0/18:3/24:2)	C61H108O6	937.812	31.04	TAG	Glycerolipids [GL]	5.7	0.98	0.002	240	369	553	515
TAG 16:0/18:3/24:2	TAG (16:0/18:3/24:2)	C61H108O6	954.844	30.08	TAG	Glycerolipids [GL]	3.1	0.22	0.014	2580	4820	6800	5630
TAG 16:0/18:2/18:2	TAG (16:0/18:2/18:2)	C55H98O6	855.736	28.56	TAG	Glycerolipids [GL]	5.3	0.45	0.002	588	946	941	922
TAG 16:0/18:1/22:1	TAG (16:0/18:1/22:1)	C59H110O6	932.858	31.18	TAG	Glycerolipids [GL]	3.4	0.65	0.002	1730	3520	4980	4660
TAG 16:0/18:1/20:4	TAG (16:0/18:1/20:4)	C57H100O6	881.753	28.81	TAG	Glycerolipids [GL]	6.7	0.96	0.002	1530	2230	2850	2720
TAG 16:0/18:1/20:3	TAG (16:0/18:1/20:3)	C57H102O6	883.762	29.34	TAG	Glycerolipids [GL]	8	0.98	0.002	402	553	637	605
TAG 16:0/18:1/20:1	TAG (16:0/18:1/20:1)	C57H106O6	904.831	30.06	TAG	Glycerolipids [GL]	0.1	0.74	0.002	10300	19200	31500	26500
TAG 16:0/18:1/18:1	TAG (16:0/18:1/18:1)	C55H102O6	876.8	28.83	TAG	Glycerolipids [GL]	0.5	0.8	0.002	26200	47100	63300	60000
TAG 16:0/17:1/18:1	TAG (16:0/17:1/18:1)	C54H100O6	862.782	28.93	TAG	Glycerolipids [GL]	5.4	0.61	0.002	1540	1750	1580	1610
TAG 16:0/17:0/18:1	TAG (16:0/17:0/18:1)	C54H102O6	864.795	29.2	TAG	Glycerolipids [GL]	6.1	0.77	0.002	1230	1480	1500	1490
TAG 16:0/16:1/17:1	TAG (16:0/16:1/17:1)	C52H96O6	834.749	27.38	TAG	Glycerolipids [GL]	3.5	0.75	0.002	2510	2680	2720	2690
TAG 16:0/16:0/18:1	TAG (16:0/16:0/18:1)	C53H100O6	850.783	28.56	TAG	Glycerolipids [GL]	2.1	0.9	0.002	7680	12300	11700	11600
TAG 16:0/16:0/17:1	TAG (16:0/16:0/17:1)	C52H98O6	836.765	28	TAG	Glycerolipids [GL]	5.7	0.74	0.002	2980	3250	2840	2930
TAG 16:0/16:0/17:0	TAG (16:0/16:0/17:0)	C52H100O6	838.778	28.72	TAG	Glycerolipids [GL]	6.8	0.67	0.002	1750	1950	1810	1900
TAG 16:0/16:0/16:1	TAG (16:0/16:0/16:1)	C51H96O6	822.75	27.8	TAG	Glycerolipids [GL]	1.5	0.77	0.002	6670	8910	8370	8210
TAG 16:0/16:0/16:0	TAG (16:0/16:0/16:0)	C51H98O6	824.763	28.2	TAG	Glycerolipids [GL]	7.1	0.87	0.002	3580	4630	4010	4200
TAG 16:0/14:0/20:5	TAG (16:0/14:0/20:5)	C53H92O6	825.693	26.91	TAG	Glycerolipids [GL]	0.9	0.98	0.002	406	421	455	433
TAG 16:0/14:0/16:1	TAG (16:0/14:0/16:1)	C49H92O6	794.719	26.61	TAG	Glycerolipids [GL]	2.5	0.56	0.002	3550	4380	4220	4080
TAG 16:0/14:0/16:0	TAG (16:0/14:0/16:0)	C49H94O6	796.731	28.12	TAG	Glycerolipids [GL]	4.5	0.87	0.002	3040	3440	3230	3210
TAG 16:0/14:0/14:1	TAG (16:0/14:0/14:1)	C47H88O6	766.688	25.81	TAG	Glycerolipids [GL]	3.5	0.81	0.002	1290	1500	1510	1530
TAG 16:0/14:0/14:0	TAG (16:0/14:0/14:0)	C47H90O6	768.702	26.32	TAG	Glycerolipids [GL]	6.9	0.83	0.002	1590	1860	1640	1610
TAG 16:0/13:0/14:0	TAG (16:0/13:0/14:0)	C46H88O6	754.689	25.89	TAG	Glycerolipids [GL]	2.8	0.79	0.002	920	912	871	871
TAG 16:0/12:0/14:0	TAG (16:0/12:0/14:0)	C45H86O6	740.681	25.22	TAG	Glycerolipids [GL]	0.6	0.76	0.002	657	705	681	720
TAG 15:0/16:0/16:1	TAG (15:0/16:0/16:1)	C50H94O6	808.734	27.04	TAG	Glycerolipids [GL]	2.8	0.78	0.002	3070	3280	3230	3160
TAG 15:0/16:0/16:0	TAG (15:0/16:0/16:0)	C50H96O6	810.749	27.71	TAG	Glycerolipids [GL]	5.4	0.9	0.002	2870	2980	2900	2930
TAG 15:0/14:0/16:1	TAG (15:0/14:0/16:1)	C48H90O6	780.703	26.17	TAG	Glycerolipids [GL]	3	0.76	0.002	1550	1690	1550	1590
TAG 15:0/14:0/16:0	TAG (15:0/14:0/16:0)	C48H92O6	782.718	26.67	TAG	Glycerolipids [GL]	3.7	0.85	0.002	1990	2180	2120	2120
TAG 14:0/14:0/20:4	TAG (14:0/14:0/20:4)	C51H90O6	799.685	26.65	TAG	Glycerolipids [GL]	0.8	0.97	0.002	338	373	343	346
TAG 64:13	TAG 64:13	C55H105NO13	1005.79	22.95	TAG	Glycerolipids [GL]	2.2	0	1	191	329	326	260
TAG 63:4	TAG 63:4	C66H120O6	1026.95	31.91	TAG	Glycerolipids [GL]	2.3	0	1	103	125	187	192
TAG 63:13	TAG 63:13	C66H102O6	1008.81	23.21	TAG	Glycerolipids [GL]	3.2	0.58	0.172	129	168	294	290
TAG 62:6	TAG 62:6	C65H114O6	1008.89	31.94	TAG	Glycerolipids [GL]	3.8	0.74	0.212	157	263	285	292
TAG 61:1	TAG 61:1	C64H122O6	1004.97	31.9	TAG	Glycerolipids [GL]	5.8	0.08	0.702	259	388	635	588
TAG 60:6	TAG 60:6	C63H110O6	980.849	30.95	TAG	Glycerolipids [GL]	4.5	0.97	0.028	560	1040	1230	1110
TAG 60:5	TAG 60:5	C63H112O6	982.871	31.05	TAG	Glycerolipids [GL]	5.1	0.93	0.034	584	1130	1300	1240
TAG 59:9	TAG 59:9	C62H102O6	960.794	27.61	TAG	Glycerolipids [GL]	0	0.07	0.706	1210	1780	2310	2250
TAG 59:12	TAG 59:12	C62H96O6	954.754	26.97	TAG	Glycerolipids [GL]	0.2	0.07	0.716	1390	1910	2580	2510
TAG 57:6	TAG 57:6	C60H104O6	938.822	28.38	TAG	Glycerolipids [GL]	2.5	0.94	0.21	158	265	269	247
TAG 56:5	TAG 56:5	C59H104O6	926.814	29.02	TAG	Glycerolipids [GL]	2.3	0.85	0.046	4040	7800	10800	10100
TAG 52:6	TAG 52:6	C55H94O6	851.705	27.18	DAG	Glycerolipids [GL]	4.2	0.89	0.09	308	373	419	413
TAG 51:5	TAG 51:5	C54H94O6	839.708	27.34	TAG	Glycerolipids [GL]	2.8	0.58	0.182	230	217	194	214
TAG 49:3	TAG 49:3	C52H94O6	832.735	27.44	TAG	Glycerolipids [GL]	1.8	0.9	0.044	1570	2010	2450	2410
TAG 47:3	TAG 47:3	C50H90O6	804.71	25.99	TAG	Glycerolipids [GL]	1.4	0.9	0.032	489	524	523	498
TAG 45:11	TAG 45:11	C48H70O6	760.555	18.34	TAG	Glycerolipids [GL]	1.1	0.94	0.228	1210	3790	936	500
TAG 36:0	TAG 36:0	C39H74O6	656.6	22.88	TAG	Glycerolipids [GL]	9.3	0.99	0.188	517	492	584	534
SM d42:0	SM d42:0	C47H97N2O6P	834.741	23.57	SM	Sphingolipids [SP]	1.2	0.98	0.322	392	405	280	402
SM d41:2	SM d41:2	C46H91N2O6P	816.699	25.96	SM	Sphingolipids [SP]	2.2	0.98	0.292	258	330	332	351
SM d34:1	SM d34:1	C39H79N2O6P	703.572	20.73	SM	Sphingolipids [SP]	3.6	0.98	0.13	9630	18500	34600	40500
SM d34:0	SM d34:0	C39H81N2O6P	705.588	31.91	SM	Sphingolipids [SP]	1.6	1	0.158	146	167	251	254
SHexCer d40:1	SHexCer d40:1	C46H89NO11S	864.618	17.61	SHerCER	Sphingolipids [SP]	2.9	0.53	0.178	36200	55100	39900	52700
S4:18P3:16/F1:2	S4:18(P3:16/F1:2)	C29H48O15	654.334	19.01			0.2	0.1	0.48	2190	1790	1470	1320
PS18:0/18:0	PS(18:0/18:0)	C42H82NO10P	792.573	21.36	PS	Glycerophospholipids [GP]	3.6	0.84	0.002	607	1100	2310	2310
PS 48:1	PS 48:1	C54H104NO10P	975.773	30.12	PS	Glycerophospholipids [GP]	0.8	0.01	1.002	173	200	282	233
PS 46:2	PS 46:2	C52H98NO10P	945.727	28.32	PS	Glycerophospholipids [GP]	0	0.98	0.054	111	156	142	142
PS 46:1	PS 46:1	C52H100NO10P	947.742	29.03	PS	Glycerophospholipids [GP]	0.3	0.98	0.13	219	327	355	344
PS 45:5	PS 45:5	C51H90NO10P	908.638	17.57	PS	Glycerophospholipids [GP]	0.3	0.2	0.182	17300	28700	19700	24400
PS 44:1	PS 44:1	C50H96NO10P	919.711	27.92	PS	Glycerophospholipids [GP]	0.6	0.01	1.002	162	195	174	180
PS 44:0	PS 44:0	C50H98NO10P	921.725	28.46	PS	Glycerophospholipids [GP]	0.2	0.2	0.486	362	437	511	507
PS 40:3	PS 40:3	C46H84NO10P	859.614	19.48	PS	Glycerophospholipids [GP]	1.8	0.01	1.002	203	264	368	323
PS 36:3	PS 36:3	C42H76NO10P	803.549	20.01	PS	Glycerophospholipids [GP]	2.6	0.98	0.022	1140	1290	939	1210
PMeOH 47:2	PMeOH 47:2	C51H97O8P	869.695	27.82	PMeOH	Glycerophospholipids [GP]	3.8	0.12	0.322	469	560	536	554
PMeOH 34:6	PMeOH 34:6	C38H63O8P	679.428	23.87	PMeOH	Glycerophospholipids [GP]	6.2	0.12	0.298	4580	8080	9470	9020
PI18:1/20:3	PI(18:1/20:3)	C47H83O13P	904.587	20.64	PI	Glycerophospholipids [GP]	1.2	0.68	0.002	414	940	2630	2510
PI18:1/18:1	PI(18:1/18:1)	C45H83O13P	880.592	20.05	PI	Glycerophospholipids [GP]	0.1	0.78	0.004	396	653	1500	1420
PI16:0/20:3	PI(16:0/20:3)	C45H81O13P	878.573	19.59	PI	Glycerophospholipids [GP]	0.6	0.66	0.002	1900	2420	1610	1590
Phytosphingosine not validated isomer of 1696	Phytosphingosine (not validated, isomer of 1696)	C18H39NO3	318.301	22.54		Sphingolipids [SP]	2.3	0.07	0.418	58.3	85.2	110	117
PG18:19Z/18:0	PG(18:1(9Z)/18:0)	C42H81O10P	794.591	21.51	PG	Glycerophospholipids [GP]	0.6	0.34	0.078	1010	2340	4660	4790
PE18:19Z/18:19Z	PE(18:1(9Z)/18:1(9Z))	C41H78NO8P	744.559	21.39	PE	Glycerophospholipids [GP]	4.7	0.99	0.008	1770	5210	15500	15400
PE 40:5e	PE 40:5e	C45H82NO7P	780.584	21.75	PE	Glycerophospholipids [GP]	7.7	0.89	0.068	927	1960	3970	3750
PE 38:5e	PE 38:5e	C43H78NO7P	752.553	21.73	PE	Glycerophospholipids [GP]	6.2	0.85	0.09	1450	3590	8170	8170
PE 38:4e	PE 38:4e	C43H80NO7P	754.57	21.92	PE	Glycerophospholipids [GP]	2.4	0.84	0.086	1460	3040	8070	7530
PE 36:5e	PE 36:5e	C41H74NO7P	724.525	21.33	PE	Glycerophospholipids [GP]	2.8	0.84	0.092	651	1630	3290	3240
PE 34:2e	PE 34:2e	C39H76NO7P	702.541	21.64	PE	Glycerophospholipids [GP]	2.9	0.84	0.066	651	1330	3870	4070
PE 25:0	PE 25:0	C30H60NO8P	594.412	19.73	PE	Glycerophospholipids [GP]	0.9	1	0.228	6230	8570	9520	8650
PE 24:6e	PE 24:6e	C29H48NO7P	554.319	16.69	PE	Glycerophospholipids [GP]	8.6	0	1	2500	4020	3250	3340
PC18:19Z/18:19Z	PC(18:1(9Z)/18:1(9Z))	C44H84NO8P	786.599	21.36	PC	Glycerophospholipids [GP]	2.1	0.91	0.002	11500	30500	101000	104000
PC17:0/17:0	PC(17:0/17:0)	C42H84NO8P	762.595	21.53	PC	Glycerophospholipids [GP]	6.9	0.9	0.002	8610	15100	47700	51500
PC16:0/18:19Z	PC(16:0/18:1(9Z))	C42H82NO8P	760.583	21.26	PC	Glycerophospholipids [GP]	2.9	0.91	0.002	32800	64600	169000	178000
PC 42:3	PC 42:3	C50H94NO8P	868.678	22.55	PC	Glycerophospholipids [GP]	2.9	0.95	0.034	125	187	459	445
PC 42:2	PC 42:2	C50H96NO8P	870.693	22.94	PC	Glycerophospholipids [GP]	0	0.85	0.042	190	267	675	587
PC 42:1e	PC 42:1e	C50H100NO7P	858.732	27.23	PC	Glycerophospholipids [GP]	0.7	0.98	0.32	128	326	180	319
PC 40:9	PC 40:9	C48H78NO8P	828.555	19.77	PC	Glycerophospholipids [GP]	0.1	0.95	0.158	1050	132	976	765
PC 40:6	PC 40:6	C48H84NO8P	834.595	21.3	PC	Glycerophospholipids [GP]	3.1	0.95	0.034	368	709	1620	1740
PC 40:5	PC 40:5	C48H86NO8P	836.616	21.56	PC	Glycerophospholipids [GP]	0.1	0.99	0.022	488	1040	2900	2980
PC 40:4	PC 40:4	C48H88NO8P	838.626	21.72	PC	Glycerophospholipids [GP]	3.6	0.98	0.018	523	1410	3950	4140
PC 39:6	PC 39:6	C47H82NO8P	820.593	17.63	PC	Glycerophospholipids [GP]	7.1	0.29	0.242	63900	96600	61000	82300
PC 38:5	PC 38:5	C46H82NO8P	808.576	20.66	PC	Glycerophospholipids [GP]	6.8	0.99	0.016	1330	2700	7190	8120
PC 38:4	PC 38:4	C46H84NO8P	810.593	21.33	PC	Glycerophospholipids [GP]	8.4	0.99	0.016	1820	3960	10800	11300
PC 38:3	PC 38:3	C46H86NO8P	812.616	21.57	PC	Glycerophospholipids [GP]	0.4	0.99	0.022	1630	4240	16800	18100
PC 38:1	PC 38:1	C46H90NO8P	816.649	22.15	PC	Glycerophospholipids [GP]	0	1	0.014	740	1540	5310	5540
PC 36:6e	PC 36:6e	C44H78NO7P	781.591	22.09	PC	Glycerophospholipids [GP]	5	0.98	0.306	427	930	1910	1800
PC 36:3	PC 36:3	C44H82NO8P	784.584	21.12	PC	Glycerophospholipids [GP]	0.2	1	0.028	3170	6540	16400	18900
PC 35:5	PC 35:5	C43H76NO8P	766.542	21.23	PC	Glycerophospholipids [GP]	3.9	0.98	0.03	598	1550	3680	3950
PC 35:4	PC 35:4	C43H78NO8P	768.561	21.42	PC	Glycerophospholipids [GP]	7.8	0.95	0.132	1200	2990	6930	6860
PC 33:2	PC 33:2	C41H78NO8P	761.587	21.27	PC	Glycerophospholipids [GP]	8.1	0.95	0.148	13100	26000	67600	71600
PC 33:1e	PC 33:1e	C41H82NO7P	749.615	22.01	PC	Glycerophospholipids [GP]	0.3	0.98	0.32	815	1280	4930	4770
PC 32:2	PC 32:2	C40H76NO8P	730.544	20.22	PC	Glycerophospholipids [GP]	0.5	0.98	0.026	2650	4210	7080	7050
PC 32:1	PC 32:1	C40H78NO8P	732.554	20.86	PC	Glycerophospholipids [GP]	0.3	0.98	0.018	16200	26400	63100	64000
PC 32:0e	PC 32:0e	C40H82NO7P	720.584	21.53	PC	Glycerophospholipids [GP]	7.6	1	0.162	4630	7340	20200	22200
PC 31:1	PC 31:1	C39H76NO8P	735.571	21.17	PC	Glycerophospholipids [GP]	7.7	0.95	0.132	11400	19200	47000	52300
PC 30:0	PC 30:0	C38H76NO8P	706.538	20.74	PC	Glycerophospholipids [GP]	0.1	0.97	0.022	16500	32200	76300	88800
PC 28:0	PC 28:0	C36H72NO8P	678.503	20.33	PC	Glycerophospholipids [GP]	4.3	0.97	0.026	2530	3750	6600	6910
PC 25:0	PC 25:0	C33H66NO8P	636.457	19.67	PC	Glycerophospholipids [GP]	2.4	0.96	0.024	62800	73300	71500	57900
PC 18:0/18:19Z	PC 18:0/18:1(9Z)	C26H52NO7P	522.352	18.51	PC	Glycerophospholipids [GP]	4	0.86	0.002	35300	37300	57000	51900
OleoylLCarnitine	Oleoyl-L-Carnitine	C25H47NO4	443.381	19.53	FA	Fatty Acyls [FA]	4.3	0	1	3360	3580	3470	3490
Myriocin	Myriocin	C21H39NO6	419.314	20.44	FA	Fatty Acyls [FA]	5.4	0.29	0.068	13500	19700	18300	18500
Myriocin	Myriocin	C21H39NO6	419.312	17.64	FA	Fatty Acyls [FA]	0.3	0.06	0.394	26800	32900	25400	30200
MGDG 34:3	MGDG 34:3	C43H76O10	770.581	21.59	MGDG	Glycerolipids [GL]	2	0.61	0.39	1440	3290	8870	9080
MGDG 34:2	MGDG 34:2	C43H78O10	772.598	21.75	MGDG	Glycerolipids [GL]	1.5	0.61	0.37	1110	2280	7350	7080
MGDG 34:2	MGDG 34:2	C43H78O10	772.598	19.37	MGDG	Glycerolipids [GL]	4.6	0.21	0.88	910	862	497	530
Medroxyprogesteroneacetate	Medroxyprogesteroneacetate	C24H34O4	404.275	17.62		Sterol Lipids [ST]	3.8	0.42	0.006	156	155	112	193
MAG 24:4	MAG 24:4	C27H46O4	435.349	18.98		Sterol Lipids [ST]	4.3	0.99	0.286	528	446	471	429
MAG 22:5	MAG 22:5	C25H40O4	405.301	20.03	MAG	Glycerolipids [GL]	2	0	1	770	764	364	1420
MAG 21:1	MAG 21:1	C24H46O4	399.343	20.49	MAG	Glycerolipids [GL]	6.1	0	1	3830	4250	4180	4220
MAG 20:4	MAG 20:4	C23H38O4	379.291	19.44	MAG	Glycerolipids [GL]	5.6	0	1	490	188	894	172
MAG 20:1	MAG 20:1	C23H44O4	385.333	20.12	MAG	Glycerolipids [GL]	3.1	0	1	2990	3170	3420	3560
MAG 19:2	MAG 19:2	C22H40O4	386.328	19.61	MAG	Glycerolipids [GL]	0.9	0	1	2350	2510	2270	1640
MAG 19:1	MAG 19:1	C22H42O4	388.339	20.03	MAG	Glycerolipids [GL]	6.2	0.94	0.36	4990	8140	8550	8430
MAG 19:1	MAG 19:1	C22H42O4	371.313	20.05	MAG	Glycerolipids [GL]	4.9	0	1	9530	13300	13900	13600
MAG 17:0	MAG 17:0	C20H40O4	345.299	19.49	MAG	Glycerolipids [GL]	2.9	0.99	0.318	1110	919	954	869
MAG 16:0	MAG 16:0	C19H38O4	331.284	19.21	MAG	Glycerolipids [GL]	0.4	0.1	0.63	4280	3990	3760	4060
LysoPC 18:19Z	Lyso-PC 18:1(9Z)	C44H86NO8P	788.614	21.71	LPC	Glycerophospholipids [GP]	2.5	0.72	0.002	7810	16800	61900	64600
LPC 22:2	LPC 22:2	C30H58NO7P	593.433	19.01	LPC	Glycerophospholipids [GP]	5	0.92	0.214	1690	1970	938	798
LPC 20:4	LPC 20:4	C28H50NO7P	544.33	17.54	LPC	Glycerophospholipids [GP]	0.3	0.95	0.018	1880	399	2430	2490
LPC 20:2	LPC 20:2	C28H54NO7P	548.372	18.64	LPC	Glycerophospholipids [GP]	2.6	0.95	0.07	2430	2510	3290	2760
LPC 20:1	LPC 20:1	C28H56NO7P	550.386	18.99	LPC	Glycerophospholipids [GP]	0.9	0.96	0.026	3090	3600	4530	4270
LPC 19:2	LPC 19:2	C27H52NO7P	551.385	17.81	LPC	Glycerophospholipids [GP]	2.2	0.92	0.216	9970	15200	5670	10400
LPC 17:2	LPC 17:2	C25H48NO7P	523.354	18.51	LPC	Glycerophospholipids [GP]	3.9	0.92	0.148	9110	9880	14400	13100
Leucylglycine	Leucylglycine	C7H12N2O5	205.083	17.92		Glycerophospholipids [GP]	3.3	0	1	2980	3010	3690	4580
LDGTS 13:1	LDGTS 13:1	C23H43NO6	447.344	20.93	LDGTS	Fatty Acyls [FA]	1	0.09	0.798	6960	10400	8770	8930
HexCerNS d33:2	HexCer-NS d33:2	C39H73NO8	684.542	19.4	HexCer	Sphingolipids [SP]	0.6	0.19	0.362	891	894	756	603
HexCerNS d30:1	HexCer-NS d30:1	C36H69NO8	644.505	20.14	HexCer	Sphingolipids [SP]	4.8	0.98	0.006	9950	12500	16900	13100
HexCerNDS d40:1	HexCer-NDS d40:1	C46H89NO8	801.687	27.18	HexCer	Sphingolipids [SP]	2.8	0.95	0.108	318	303	299	296
HexCerNDS d33:1	HexCer-NDS d33:1	C39H75NO8	686.554	21.73	HexCer	Sphingolipids [SP]	2.7	0.19	0.372	667	912	824	898
GM3 d42:2	GM3 d42:2	C65H118N2O21	1280.85	21.39	GM	Sphingolipids [SP]	5.2	0.14	0.814	379	902	738	684
GM3 d38:1	GM3 d38:1	C61H112N2O21	1226.8	20.71	GM	Sphingolipids [SP]	3.6	0.41	0.168	4360	9800	6690	6140
GM3 d36:0	GM3 d36:0	C59H110N2O21	1200.79	24.21	GM	Sphingolipids [SP]	2.7	0.1	0.878	83	168	227	207
Glycohyocholic acid	Glycohyocholic acid	C26H43NO4	451.35	18.23		Sterol Lipids [ST]	3.5	0.06	0.064	2350	3180	2340	2240
Docosahexaenoic acid	Docosahexaenoic acid	C22H32O2	329.245	18.62	FA	Fatty Acyls [FA]	0.4	0.01	0.058	769	724	917	947
Dioctylphthalate	Dioctylphthalate	C24H38O4	391.283	20.03		Sterol Lipids [ST]	2.4	0.99	0.002	35400	45100	41900	45500
Dioctylphthalate	Dioctylphthalate	C24H38O4	408.311	20.1		Sterol Lipids [ST]	0.9	0.99	0.006	2580	3540	3290	3470
DGDG 27:2	DGDG 27:2	C42H74O15	819.511	20.04	DGDG	Glycerolipids [GL]	0.6	0.5	0.768	213	249	230	252
DAG18:1/18:1	DAG(18:1/18:1)	C39H72O5	638.569	22.73	DAG	Glycerolipids [GL]	2.8	0.88	0.002	2180	3360	7510	7080
DAG18:0/16:0	DAG(18:0/16:0)	C37H72O5	614.567	23.05	DAG	Glycerolipids [GL]	5.2	0.92	0.002	5190	4140	4390	4540
DAG18:0/16:0	DAG(18:0/16:0)	C37H72O5	614.576	28.29	DAG	Glycerolipids [GL]	4	0.89	0.002	770	825	732	775
DAG16:0/20:1	DAG(16:0/20:1)	C39H74O5	640.581	23.07	DAG	Glycerolipids [GL]	9.6	0.87	0.002	1400	2010	3440	3380
DAG16:0/16:0	DAG(16:0/16:0)	C35H68O5	586.537	22.52	DAG	Glycerolipids [GL]	5.8	0.94	0.002	3930	3330	3650	3830
DAG16:0/14:0	DAG(16:0/14:0)	C33H64O5	558.514	24.38	DAG	Glycerolipids [GL]	6.9	0.81	0.002	453	492	518	501
Dehydrophytosphingosine not validated isomer of 1677	Dehydrophytosphingosine (not validated, isomer of 1677)	C18H35NO3	314.268	18.7	FA	Fatty Acyls [FA]	1	0.83	0.044	568	473	437	394
DAG 43:2	DAG 43:2	C46H86O5	736.679	20.39	DAG	Glycerolipids [GL]	3.4	0.72	0.168	549	611	446	534
DAG 43:0	DAG 43:0	C46H90O5	723.682	24.14	DAG	Glycerolipids [GL]	0.2	0.03	1.002	284	378	298	436
DAG 40:4	DAG 40:4	C43H76O5	690.601	23.26	DAG	Glycerolipids [GL]	5.2	0.93	0.06	316	455	759	756
DAG 36:4	DAG 36:4	C39H68O5	617.512	22.65	DAG	Glycerolipids [GL]	0.6	0.68	0.344	685	761	1070	1050
DAG 35:2	DAG 35:2	C38H70O5	624.558	23.08	DAG	Glycerolipids [GL]	0.9	0.93	0.076	1060	1280	1500	1530
DAG 34:7	DAG 34:7	C37H58O5	600.464	17.87	DAG	Glycerolipids [GL]	0	0.08	0.782	210000	276000	185000	225000
DAG 34:1	DAG 34:1	C37H70O5	612.552	22.59	DAG	Glycerolipids [GL]	5.2	0.96	0.096	2810	4010	6750	6620
DAG 33:2	DAG 33:2	C36H66O5	596.524	22.42	DAG	Glycerolipids [GL]	0.5	0.93	0.058	999	1190	1390	1350
DAG 33:0	DAG 33:0	C36H70O5	600.558	25.57	DAG	Glycerolipids [GL]	2.7	0.93	0.116	252	260	277	262
DAG 32:2	DAG 32:2	C35H64O5	582.507	21.81	DAG	Glycerolipids [GL]	1.1	0.9	0.09	959	1150	1110	1070
DAG 31:0	DAG 31:0	C34H66O5	572.529	24.7	DAG	Glycerolipids [GL]	6.7	0.96	0.09	571	602	735	718
DAG 28:0	DAG 28:0	C31H60O5	530.481	21.63	DAG	Glycerolipids [GL]	5.1	0.96	0.092	326	367	415	305
DAG 25:4	DAG 25:4	C28H46O5	463.338	17.57	DAG	Sterol Lipids [ST]	4.9	0.68	0.368	32700	45900	36000	40100
DAG 20:2	DAG 20:2	C23H40O5	397.298	17.66	DAF	DAG	5.1	0.68	0.38	18100	20500	16500	19100
CL 68:7	CL 68:7	C77H136O17P2	1412.96	22.32	CL	Glycerophospholipids [GP]	1.7	0	1	428	580	536	478
Cis8111417Eicosatetraenoic acid	Cis-8,11,14,17-Eicosatetraenoic acid	C20H32O2	305.246	19.84	FA	Fatty Acyls [FA]	4.1	0.29	0.012	2160	2020	2390	2680
ChE19:0	ChE(19:0)	C46H82O2	684.661	31.9	ChE	Sterol Lipids [ST]	2.4	0.8	0.002	1570	3340	5960	5790
ChE18:1	ChE(18:1)	C45H78O2	668.629	29.8	ChE	Sterol Lipids [ST]	7	0.91	0.002	1080	1140	1450	1310
ChE16:1	ChE(16:1)	C43H74O2	640.598	28.52	ChE	Sterol Lipids [ST]	7	0.9	0.002	1790	1920	1850	1910
CerNS d43:1	Cer-NS d43:1	C43H85NO3	664.658	23.95	CER	Sphingolipids [SP]	2	0.99	0.004	41700	54000	86400	91100
CE 22:0	CE 22:0	C49H88O2	709.685	24	CE	Sterol Lipids [ST]	0.3	0.18	0.64	77.2	127	60.8	107
CE 20:4	CE 20:4	C47H76O2	673.586	29.81	CE	Sterol Lipids [ST]	7.4	0.97	0.02	150	139	167	156
CE 20:2	CE 20:2	C47H80O2	694.643	30.21	CE	Sterol Lipids [ST]	6	0.96	0.13	148	128	222	185
CE 18:2	CE 18:2	C45H76O2	666.619	28.99	CE	Sterol Lipids [ST]	0.4	0.97	0.076	372	360	415	433
CE 17:1	CE 17:1	C44H76O2	654.613	29.07	CE	Sterol Lipids [ST]	6.7	0.97	0.008	405	450	433	445
CE 15:1	CE 15:1	C42H72O2	626.581	27.92	CE	Sterol Lipids [ST]	9	0.98	0.004	383	403	363	374
CE 15:0	CE 15:0	C42H74O2	628.596	28.79	CE	Sterol Lipids [ST]	8.3	0.99	0.01	599	664	611	633
C17 Glucosyl Ceramide d18:1/17:0	C17 Glucosyl() Ceramide (d18:1/17:0)	C41H79NO8	714.586	22.09	CER	Sphingolipids [SP]	0.4	0.03	0.37	701	727	787	732
BMP 36:0	BMP 36:0	C42H83O10P	796.604	21.75	BMP	Glycerophospholipids [GP]	1.2	0.1	0.822	1280	2930	6890	7040
9EHeptadecenoic acid	9E-Heptadecenoic acid	C17H32O2	286.273	20.19	FA	Fatty Acyls [FA]	2.2	0.23	0.246	385	741	702	621
7788Tetrahydrobetabetacarotene	7,7',8,8'-Tetrahydro-beta,beta-carotene	C40H60	541.478	21.72			7	0.97	0.002	553	834	535	488
3OAcetyldiosgenin	3-O-Acetyldiosgenin	C29H44O4	474.36	19.63		Sterol Lipids [ST]	5.1	0.2	0.102	473	428	324	471
2Rhydroxydocosanoic acid	2(R)-hydroxydocosanoic acid	C22H44O3	374.364	24.91	FA	Fatty Acyls [FA]	1.9	0.03	0.346	44.7	68.9	91.4	79.5
18:02ROH Ceramide	18:0(2R-OH) Ceramide	C36H71NO4	582.542	29.13	CER	Sphingolipids [SP]	4.3	0.75	0.058	128	224	263	242
11Oxooctadecanoic acid	11-Oxooctadecanoic acid	C18H34O3	299.257	18.73	FA	Fatty Acyls [FA]	0.1	0.18	0.296	1800	1810	1840	1740
(WE 42:1 WE 42:1 WE 42:1 WE 42:1)	-	C42H82O2	636.659	29.86	FA	Fatty Acyls [FA]	8.2	-	-	718	715	787	767
(WE 41:1)	-	C41H80O2	622.644	29.19	FA	Fatty Acyls [FA]	7.5	-	-	1160	1240	1210	1210
(WE 40:3 WE 40:3 WE 40:3)	-	C40H74O2	604.597	26.84	FA	Fatty Acyls [FA]	6.6	-	-	1040	1080	1100	1080
(WE 40:2 WE 40:2)	-	C40H76O2	606.613	27.61	FA	Fatty Acyls [FA]	5.5	-	-	3030	2980	2820	2890
(WE 40:1 WE 40:1 WE 40:1)	-	C40H78O2	608.629	28.6	FA	Fatty Acyls [FA]	7.1	-	-	2500	2590	2410	2540
(WE 39:1)	-	C39H76O2	594.614	27.92	FA	Fatty Acyls [FA]	6.8	-	-	2620	2670	2450	2530
(WE 38:3 WE 38:3 FA 38:3 FA 38:3 FA 38:3 FA 38:3 FA 38:3)	-	C38H70O2	576.566	25.94	FA	Fatty Acyls [FA]	6.9	-	-	1400	1360	1420	1480
(WE 38:2 WE 38:2)	-	C38H72O2	578.584	26.56	FA	Fatty Acyls [FA]	2.8	-	-	5660	5780	5770	5830
(WE 38:1 WE 38:1 WE 38:1 WE 38:1)	-	C38H74O2	580.598	27.41	FA	Fatty Acyls [FA]	5.8	-	-	3970	3980	3820	3820
(WE 37:1)	-	C37H72O2	566.583	26.82	FA	Fatty Acyls [FA]	4.1	-	-	4200	4360	4230	4230
(WE 36:2 WE 36:2 WE 36:2 FA 36:2 FA 36:2)	-	C36H68O2	550.553	25.68	FA	Fatty Acyls [FA]	4.1	-	-	9540	8870	8240	8720
(WE 36:1 WE 36:1 WE 36:1 WE 36:1 WE 36:1 WE 36:1 WE 36:1 FA 36:1)	-	C36H70O2	552.568	26.41	FA	Fatty Acyls [FA]	3.2	-	-	6720	7100	6850	6880
(WE 36:1 WE 36:1 WE 36:1 WE 36:1 WE 36:1 WE 36:1 WE 36:1 FA 36:1)	-	C36H70O2	535.54	26.45	FA	Fatty Acyls [FA]	6.3	-	-	2260	2460	2350	2340
(WE 35:1 FA 35:1)	-	C35H68O2	538.552	25.9	FA	Fatty Acyls [FA]	5.8	-	-	4670	4510	4270	4410
(WE 34:3 WE 34:3 WE 34:3 WE 34:3 FA 34:3 FA 34:3 FA 34:3 FA 34:3 FA 34:3)	-	C34H62O2	520.506	24.87	FA	Fatty Acyls [FA]	4.6	-	-	695	722	750	766
(WE 34:2 WE 34:2 WE 34:2 WE 34:2 FA 34:2 FA 34:2)	-	C34H64O2	522.52	24.89	FA	Fatty Acyls [FA]	7.9	-	-	2980	2870	3080	3120
(WE 33:1 FA 33:1)	-	C33H64O2	510.521	25.04	FA	Fatty Acyls [FA]	5.6	-	-	3910	3870	3940	4020
(WE 33:1 FA 33:1)	-	C33H64O2	493.494	25.05	FA	Fatty Acyls [FA]	8	-	-	2240	2300	2330	2310
(WE 32:3 WE 32:3 WE 32:3)	-	C32H58O2	492.476	24.42	FA	Fatty Acyls [FA]	3.3	-	-	161	162	181	159
(WE 32:2 WE 32:2 WE 32:2 WE 32:2 WE 32:2 FA 32:2 FA 32:2)	-	C32H60O2	494.494	24.97	FA	Fatty Acyls [FA]	0.1	-	-	1240	1170	1260	1290
(TG 65:0)	-	C68H132O6	1046.01	25.2	TAG	Glycerolipids [GL]	2.4	-	-	20.5	30.8	76.8	89.3
(TG 64:8 TG 64:8 TG 64:8 TG 64:8 TG 64:8 TG 64:8 TG 64:8 TG 64:8 TG 64:8 TG 64:8 TG 64:8 TG 64:8 TG 64:8 TG 64:8 TG 64:8 TG 64:8 TG 64:8 TG 64:8 TG 64:8 TG 64:8 TG 64:8 TG 64:8 TG 64:8 TG 64:8)	-	C67H114O6	1032.89	31.68	TAG	Glycerolipids [GL]	0.4	-	-	66.4	99.8	75.2	81.2
(TG 64:15 TG 64:15 TG 64:15 TG 64:15)	-	C67H100O6	1018.78	34.97	TAG	Glycerolipids [GL]	1.1	-	-	772	1230	1950	1890
(TG 63:13)	-	C66H102O6	991.775	23.46	TAG	Glycerolipids [GL]	0.7	-	-	166	215	269	253
(TG 62:8 TG 62:8 TG 62:8 TG 62:8 TG 62:8 TG 62:8 TG 62:8 TG 62:8 TG 62:8 TG 62:8 TG 62:8 TG 62:8 TG 62:8 TG 62:8 TG 62:8 TG 62:8 TG 62:8 TG 62:8 TG 62:8 TG 62:8 TG 62:8 TG 62:8 TG 62:8 TG 62:8 TG 62:8 TG 62:8 TG 62:8 TG 62:8 TG 62:8 TG 62:8 TG 62:8 TG 62:8 TG 62:8 TG 62:8 TG 62:8 TG 62:8 TG 62:8 TG 62:8 TG 62:8 TG 62:8 TG 62:8 TG 62:8)	-	C65H110O6	1004.85	30.48	TAG	Glycerolipids [GL]	3.4	-	-	171	294	303	265
(TG 62:8 TG 62:8 TG 62:8 TG 62:8 TG 62:8 TG 62:8 TG 62:8 TG 62:8 TG 62:8 TG 62:8 TG 62:8 TG 62:8 TG 62:8 TG 62:8 TG 62:8 TG 62:8 TG 62:8 TG 62:8 TG 62:8 TG 62:8 TG 62:8 TG 62:8 TG 62:8 TG 62:8 TG 62:8 TG 62:8 TG 62:8 TG 62:8 TG 62:8 TG 62:8 TG 62:8 TG 62:8 TG 62:8 TG 62:8 TG 62:8 TG 62:8 TG 62:8 TG 62:8 TG 62:8 TG 62:8 TG 62:8 TG 62:8)	-	C65H110O6	987.83	31.35	TAG	Glycerolipids [GL]	6.1	-	-	84.6	128	149	140
(TG 62:7 TG 62:7 TG 62:7 TG 62:7 TG 62:7 TG 62:7 TG 62:7 TG 62:7 TG 62:7 TG 62:7 TG 62:7 TG 62:7 TG 62:7 TG 62:7 TG 62:7 TG 62:7 TG 62:7 TG 62:7 TG 62:7 TG 62:7 TG 62:7 TG 62:7 TG 62:7 TG 62:7 TG 62:7 TG 62:7 TG 62:7 TG 62:7 TG 62:7 TG 62:7 TG 62:7 TG 62:7 TG 62:7 TG 62:7 TG 62:7 TG 62:7 TG 62:7 TG 62:7 TG 62:7 TG 62:7 TG 62:7 TG 62:7 TG 62:7)	-	C65H112O6	1006.87	31.07	TAG	Glycerolipids [GL]	3.7	-	-	176	316	300	290
(TG 62:6 TG 62:6 TG 62:6 TG 62:6 TG 62:6 TG 62:6 TG 62:6 TG 62:6 TG 62:6 TG 62:6 TG 62:6 TG 62:6 TG 62:6 TG 62:6 TG 62:6 TG 62:6 TG 62:6 TG 62:6 TG 62:6 TG 62:6 TG 62:6 TG 62:6 TG 62:6 TG 62:6 TG 62:6 TG 62:6 TG 62:6 TG 62:6 TG 62:6 TG 62:6 TG 62:6 TG 62:6 TG 62:6 TG 62:6 TG 62:6 TG 62:6 TG 62:6 TG 62:6 TG 62:6 TG 62:6 TG 62:6)	-	C65H114O6	991.861	33.3	TAG	Glycerolipids [GL]	7.3	-	-	63.8	76.2	146	132
(TG 62:5 TG 62:5 TG 62:5 TG 62:5 TG 62:5 TG 62:5 TG 62:5 TG 62:5 TG 62:5 TG 62:5 TG 62:5 TG 62:5 TG 62:5 TG 62:5 TG 62:5 TG 62:5 TG 62:5 TG 62:5 TG 62:5 TG 62:5 TG 62:5 TG 62:5 TG 62:5 TG 62:5 TG 62:5 TG 62:5 TG 62:5 TG 62:5 TG 62:5 TG 62:5 TG 62:5 TG 62:5 TG 62:5 TG 62:5 TG 62:5 TG 62:5)	-	C65H116O6	1010.9	32.83	TAG	Glycerolipids [GL]	6.9	-	-	153	251	278	286
(TG 62:4 TG 62:4 TG 62:4 TG 62:4 TG 62:4 TG 62:4 TG 62:4 TG 62:4 TG 62:4 TG 62:4 TG 62:4 TG 62:4 TG 62:4 TG 62:4 TG 62:4 TG 62:4 TG 62:4 TG 62:4 TG 62:4 TG 62:4 TG 62:4 TG 62:4 TG 62:4 TG 62:4 TG 62:4 TG 62:4 TG 62:4 TG 62:4)	-	C65H118O6	1012.92	33.85	TAG	Glycerolipids [GL]	6.1	-	-	163	244	341	324
(TG 62:3 TG 62:3 TG 62:3 TG 62:3 TG 62:3 TG 62:3 TG 62:3 TG 62:3 TG 62:3 TG 62:3 TG 62:3 TG 62:3 TG 62:3 TG 62:3 TG 62:3 TG 62:3 TG 62:3 TG 62:3 TG 62:3 TG 62:3 TG 62:3)	-	C65H120O6	1014.93	35.22	TAG	Glycerolipids [GL]	7.9	-	-	98.2	159	327	310
(TG 60:9 TG 60:9 TG 60:9 TG 60:9 TG 60:9 TG 60:9 TG 60:9 TG 60:9 TG 60:9 TG 60:9 TG 60:9 TG 60:9 TG 60:9 TG 60:9 TG 60:9 TG 60:9 TG 60:9 TG 60:9 TG 60:9 TG 60:9 TG 60:9 TG 60:9 TG 60:9 TG 60:9 TG 60:9 TG 60:9 TG 60:9 TG 60:9 TG 60:9 TG 60:9 TG 60:9 TG 60:9 TG 60:9 TG 60:9 TG 60:9 TG 60:9 TG 60:9 TG 60:9 TG 60:9 TG 60:9 TG 60:9 TG 60:9)	-	C63H104O6	974.821	28.69	TAG	Glycerolipids [GL]	3.6	-	-	211	331	102	173
(TG 60:4 TG 60:4 TG 60:4 TG 60:4 TG 60:4 TG 60:4 TG 60:4 TG 60:4 TG 60:4 TG 60:4 TG 60:4 TG 60:4 TG 60:4 TG 60:4 TG 60:4 TG 60:4 TG 60:4 TG 60:4 TG 60:4 TG 60:4 TG 60:4 TG 60:4 TG 60:4 TG 60:4 TG 60:4 TG 60:4 TG 60:4 TG 60:4 TG 60:4 TG 60:4 TG 60:4 TG 60:4 TG 60:4 TG 60:4 TG 60:4 TG 60:4 TG 60:4 TG 60:4 TG 60:4 TG 60:4 TG 60:4)	-	C63H114O6	984.887	32.19	TAG	Glycerolipids [GL]	4.1	-	-	347	689	848	788
(TG 59:7 TG 59:7 TG 59:7 TG 59:7 TG 59:7 TG 59:7 TG 59:7 TG 59:7 TG 59:7 TG 59:7 TG 59:7 TG 59:7 TG 59:7 TG 59:7 TG 59:7 TG 59:7 TG 59:7 TG 59:7 TG 59:7 TG 59:7 TG 59:7 TG 59:7 TG 59:7 TG 59:7 TG 59:7 TG 59:7 TG 59:7 TG 59:7 TG 59:7 TG 59:7 TG 59:7 TG 59:7 TG 59:7 TG 59:7 TG 59:7 TG 59:7 TG 59:7 TG 59:7 TG 59:7 TG 59:7 TG 59:7 TG 59:7 TG 59:7 TG 59:7 TG 59:7 TG 59:7 TG 59:7)	-	C62H106O6	964.837	31.7	TAG	Glycerolipids [GL]	2.9	-	-	120	185	289	250
(TG 59:5 TG 59:5 TG 59:5 TG 59:5 TG 59:5 TG 59:5 TG 59:5 TG 59:5 TG 59:5 TG 59:5 TG 59:5 TG 59:5 TG 59:5 TG 59:5 TG 59:5 TG 59:5 TG 59:5 TG 59:5 TG 59:5 TG 59:5 TG 59:5 TG 59:5 TG 59:5 TG 59:5 TG 59:5 TG 59:5 TG 59:5 TG 59:5 TG 59:5 TG 59:5 TG 59:5 TG 59:5 TG 59:5 TG 59:5 TG 59:5 TG 59:5 TG 59:5 TG 59:5 TG 59:5 TG 59:5 TG 59:5 TG 59:5 TG 59:5 TG 59:5 TG 59:5 TG 59:5 TG 59:5 TG 59:5 TG 59:5 TG 59:…	-	C62H110O6	968.858	30.72	TAG	Glycerolipids [GL]	5.5	-	-	51.8	74.6	78.5	75.8
(TG 58:8 TG 58:8 TG 58:8 TG 58:8 TG 58:8 TG 58:8 TG 58:8 TG 58:8 TG 58:8 TG 58:8 TG 58:8 TG 58:8 TG 58:8 TG 58:8 TG 58:8 TG 58:8 TG 58:8 TG 58:8 TG 58:8 TG 58:8 TG 58:8 TG 58:8 TG 58:8 TG 58:8 TG 58:8 TG 58:8 TG 58:8 TG 58:8 TG 58:8 TG 58:8 TG 58:8 TG 58:8 TG 58:8 TG 58:8 TG 58:8 TG 58:8 TG 58:8 TG 58:8 TG 58:8 TG 58:8 TG 58:8 TG 58:8 TG 58:8 TG 58:8 TG 58:8 TG 58:8 TG 58:8 TG 58:8 TG 58:8 TG 58:…	-	C61H102O6	948.795	27.68	TAG	Glycerolipids [GL]	4.6	-	-	642	1120	1470	496
(TG 58:4 TG 58:4 TG 58:4 TG 58:4 TG 58:4 TG 58:4 TG 58:4 TG 58:4 TG 58:4 TG 58:4 TG 58:4 TG 58:4 TG 58:4 TG 58:4 TG 58:4 TG 58:4 TG 58:4 TG 58:4 TG 58:4 TG 58:4 TG 58:4 TG 58:4 TG 58:4 TG 58:4 TG 58:4 TG 58:4 TG 58:4 TG 58:4 TG 58:4 TG 58:4 TG 58:4 TG 58:4 TG 58:4 TG 58:4 TG 58:4 TG 58:4 TG 58:4 TG 58:4 TG 58:4 TG 58:4 TG 58:4 TG 58:4 TG 58:4 TG 58:4 TG 58:4 TG 58:4 TG 58:4 TG 58:4 TG 58:4 TG 58:…	-	C61H110O6	939.841	28.61	TAG	Glycerolipids [GL]	1.8	-	-	116	152	128	69.7
(TG 58:2 TG 58:2 TG 58:2 TG 58:2 TG 58:2 TG 58:2 TG 58:2 TG 58:2 TG 58:2 TG 58:2 TG 58:2 TG 58:2 TG 58:2 TG 58:2 TG 58:2 TG 58:2 TG 58:2 TG 58:2 TG 58:2 TG 58:2 TG 58:2 TG 58:2 TG 58:2 TG 58:2 TG 58:2 TG 58:2 TG 58:2 TG 58:2 TG 58:2 TG 58:2 TG 58:2 TG 58:2 TG 58:2 TG 58:2 TG 58:2)	-	C61H114O6	960.884	32.45	TAG	Glycerolipids [GL]	6.4	-	-	451	637	995	922
(TG 58:10 TG 58:10 TG 58:10 TG 58:10 TG 58:10 TG 58:10 TG 58:10 TG 58:10 TG 58:10 TG 58:10 TG 58:10 TG 58:10 TG 58:10 TG 58:10 TG 58:10 TG 58:10 TG 58:10 TG 58:10 TG 58:10 TG 58:10 TG 58:10 TG 58:10 TG 58:10 TG 58:10 TG 58:10 TG 58:10 TG 58:10 TG 58:10 TG 58:10 TG 58:10 TG 58:10 TG 58:10 TG 58:10 TG 58:10)	-	C61H98O6	944.764	32.66	TAG	Glycerolipids [GL]	2.6	-	-	698	1140	1750	1670
(TG 57:7 TG 57:7 TG 57:7 TG 57:7 TG 57:7 TG 57:7 TG 57:7 TG 57:7 TG 57:7 TG 57:7 TG 57:7 TG 57:7 TG 57:7 TG 57:7 TG 57:7 TG 57:7 TG 57:7 TG 57:7 TG 57:7 TG 57:7 TG 57:7 TG 57:7 TG 57:7 TG 57:7 TG 57:7 TG 57:7 TG 57:7 TG 57:7 TG 57:7 TG 57:7 TG 57:7 TG 57:7 TG 57:7 TG 57:7 TG 57:7 TG 57:7 TG 57:7 TG 57:7 TG 57:7 TG 57:7 TG 57:7 TG 57:7 TG 57:7 TG 57:7 TG 57:7 TG 57:7 TG 57:7 TG 57:7 TG 57:7 TG 57:…	-	C60H102O6	936.803	30.31	TAG	Glycerolipids [GL]	0.1	-	-	449	594	1110	988
(TG 57:3 TG 57:3 TG 57:3 TG 57:3 TG 57:3 TG 57:3 TG 57:3 TG 57:3 TG 57:3 TG 57:3 TG 57:3 TG 57:3 TG 57:3 TG 57:3 TG 57:3 TG 57:3 TG 57:3 TG 57:3 TG 57:3 TG 57:3 TG 57:3 TG 57:3 TG 57:3 TG 57:3 TG 57:3 TG 57:3 TG 57:3 TG 57:3 TG 57:3 TG 57:3 TG 57:3 TG 57:3 TG 57:3 TG 57:3 TG 57:3 TG 57:3 TG 57:3 TG 57:3 TG 57:3 TG 57:3 TG 57:3 TG 57:3 TG 57:3 TG 57:3 TG 57:3 TG 57:3 TG 57:3 TG 57:3)	-	C60H110O6	944.858	30.98	TAG	Glycerolipids [GL]	4	-	-	103	165	208	185
(TG 56:4 TG 56:4 TG 56:4 TG 56:4 TG 56:4 TG 56:4 TG 56:4 TG 56:4 TG 56:4 TG 56:4 TG 56:4 TG 56:4 TG 56:4 TG 56:4 TG 56:4 TG 56:4 TG 56:4 TG 56:4 TG 56:4 TG 56:4 TG 56:4 TG 56:4 TG 56:4 TG 56:4 TG 56:4 TG 56:4 TG 56:4 TG 56:4 TG 56:4 TG 56:4 TG 56:4 TG 56:4 TG 56:4 TG 56:4 TG 56:4 TG 56:4 TG 56:4 TG 56:4 TG 56:4 TG 56:4 TG 56:4 TG 56:4 TG 56:4 TG 56:4 TG 56:4 TG 56:4 TG 56:4 TG 56:4 TG 56:4 TG 56:…	-	C59H106O6	911.798	30.77	TAG	Glycerolipids [GL]	3.2	-	-	159	219	286	283
(TG 56:0 TG 56:0 TG 56:0 TG 56:0 TG 56:0 TG 56:0 TG 56:0 TG 56:0 TG 56:0 TG 56:0 TG 56:0 TG 56:0 TG 56:0 TG 56:0)	-	C59H114O6	936.886	34.27	TAG	Glycerolipids [GL]	8.2	-	-	333	428	400	467
(TG 55:7 TG 55:7 TG 55:7 TG 55:7 TG 55:7 TG 55:7 TG 55:7 TG 55:7 TG 55:7 TG 55:7 TG 55:7 TG 55:7 TG 55:7 TG 55:7 TG 55:7 TG 55:7 TG 55:7 TG 55:7 TG 55:7 TG 55:7 TG 55:7 TG 55:7 TG 55:7 TG 55:7 TG 55:7 TG 55:7 TG 55:7 TG 55:7 TG 55:7 TG 55:7 TG 55:7 TG 55:7 TG 55:7 TG 55:7 TG 55:7 TG 55:7 TG 55:7 TG 55:7 TG 55:7 TG 55:7 TG 55:7 TG 55:7 TG 55:7 TG 55:7 TG 55:7 TG 55:7 TG 55:7 TG 55:7 TG 55:7 TG 55:…	-	C58H98O6	908.772	29.16	TAG	Glycerolipids [GL]	0.1	-	-	982	1570	2270	2170
(TG 55:6 TG 55:6 TG 55:6 TG 55:6 TG 55:6 TG 55:6 TG 55:6 TG 55:6 TG 55:6 TG 55:6 TG 55:6 TG 55:6 TG 55:6 TG 55:6 TG 55:6 TG 55:6 TG 55:6 TG 55:6 TG 55:6 TG 55:6 TG 55:6 TG 55:6 TG 55:6 TG 55:6 TG 55:6 TG 55:6 TG 55:6 TG 55:6 TG 55:6 TG 55:6 TG 55:6 TG 55:6 TG 55:6 TG 55:6 TG 55:6 TG 55:6 TG 55:6 TG 55:6 TG 55:6 TG 55:6 TG 55:6 TG 55:6 TG 55:6 TG 55:6 TG 55:6 TG 55:6 TG 55:6 TG 55:6 TG 55:6 TG 55:…	-	C58H100O6	910.788	30.08	TAG	Glycerolipids [GL]	1.4	-	-	559	660	1100	945
(TG 55:5 TG 55:5 TG 55:5 TG 55:5 TG 55:5 TG 55:5 TG 55:5 TG 55:5 TG 55:5 TG 55:5 TG 55:5 TG 55:5 TG 55:5 TG 55:5 TG 55:5 TG 55:5 TG 55:5 TG 55:5 TG 55:5 TG 55:5 TG 55:5 TG 55:5 TG 55:5 TG 55:5 TG 55:5 TG 55:5 TG 55:5 TG 55:5 TG 55:5 TG 55:5 TG 55:5 TG 55:5 TG 55:5 TG 55:5 TG 55:5 TG 55:5 TG 55:5 TG 55:5 TG 55:5 TG 55:5 TG 55:5 TG 55:5 TG 55:5 TG 55:5 TG 55:5 TG 55:5 TG 55:5 TG 55:5 TG 55:5 TG 55:…	-	C58H102O6	912.798	28.39	TAG	Glycerolipids [GL]	2.1	-	-	143	211	208	193
(TG 55:2 TG 55:2 TG 55:2 TG 55:2 TG 55:2 TG 55:2 TG 55:2 TG 55:2 TG 55:2 TG 55:2 TG 55:2 TG 55:2 TG 55:2 TG 55:2 TG 55:2 TG 55:2 TG 55:2 TG 55:2 TG 55:2 TG 55:2 TG 55:2 TG 55:2 TG 55:2 TG 55:2 TG 55:2 TG 55:2 TG 55:2 TG 55:2 TG 55:2 TG 55:2 TG 55:2 TG 55:2 TG 55:2 TG 55:2 TG 55:2 TG 55:2 TG 55:2 TG 55:2 TG 55:2 TG 55:2 TG 55:2 TG 55:2 TG 55:2 TG 55:2 TG 55:2 TG 55:2)	-	C58H108O6	918.84	30.72	TAG	Glycerolipids [GL]	6.9	-	-	324	308	371	424
(TG 55:0 TG 55:0 TG 55:0 TG 55:0 TG 55:0 TG 55:0 TG 55:0 TG 55:0 TG 55:0 TG 55:0 TG 55:0 TG 55:0 TG 55:0 TG 55:0 TG 55:0)	-	C58H112O6	922.871	33.2	TAG	Glycerolipids [GL]	3.9	-	-	353	368	384	361
(TG 54:3 TG 54:3 TG 54:3 TG 54:3 TG 54:3 TG 54:3 TG 54:3 TG 54:3 TG 54:3 TG 54:3 TG 54:3 TG 54:3 TG 54:3 TG 54:3 TG 54:3 TG 54:3 TG 54:3 TG 54:3 TG 54:3 TG 54:3 TG 54:3 TG 54:3 TG 54:3 TG 54:3 TG 54:3 TG 54:3 TG 54:3 TG 54:3 TG 54:3 TG 54:3 TG 54:3 TG 54:3 TG 54:3 TG 54:3 TG 54:3 TG 54:3 TG 54:3 TG 54:3 TG 54:3 TG 54:3 TG 54:3 TG 54:3 TG 54:3 TG 54:3 TG 54:3 TG 54:3 TG 54:3 TG 54:3 TG 54:3 TG 54:…	-	C57H104O6	885.798	30.13	TAG	Glycerolipids [GL]	0.7	-	-	74.1	97.3	98.6	359
(TG 53:7 TG 53:7 TG 53:7 TG 53:7 TG 53:7 TG 53:7 TG 53:7 TG 53:7 TG 53:7 TG 53:7 TG 53:7 TG 53:7 TG 53:7 TG 53:7 TG 53:7 TG 53:7 TG 53:7 TG 53:7 TG 53:7 TG 53:7 TG 53:7 TG 53:7 TG 53:7 TG 53:7 TG 53:7 TG 53:7 TG 53:7 TG 53:7 TG 53:7 TG 53:7 TG 53:7 TG 53:7 TG 53:7 TG 53:7 TG 53:7 TG 53:7 TG 53:7 TG 53:7)	-	C56H94O6	863.701	26.78	TAG	Glycerolipids [GL]	7	-	-	63.2	76.4	103	108
(TG 53:6 TG 53:6 TG 53:6 TG 53:6 TG 53:6 TG 53:6 TG 53:6 TG 53:6 TG 53:6 TG 53:6 TG 53:6 TG 53:6 TG 53:6 TG 53:6 TG 53:6 TG 53:6 TG 53:6 TG 53:6 TG 53:6 TG 53:6 TG 53:6 TG 53:6 TG 53:6 TG 53:6 TG 53:6 TG 53:6 TG 53:6 TG 53:6 TG 53:6 TG 53:6 TG 53:6 TG 53:6 TG 53:6 TG 53:6 TG 53:6 TG 53:6 TG 53:6 TG 53:6 TG 53:6 TG 53:6 TG 53:6 TG 53:6 TG 53:6 TG 53:6 TG 53:6 TG 53:6 TG 53:6 TG 53:6 TG 53:6 TG 53:…	-	C56H96O6	882.755	28.85	TAG	Glycerolipids [GL]	1.2	-	-	1020	1310	1680	1570
(TG 53:1 TG 53:1 TG 53:1 TG 53:1 TG 53:1 TG 53:1 TG 53:1 TG 53:1 TG 53:1 TG 53:1 TG 53:1 TG 53:1 TG 53:1 TG 53:1 TG 53:1 TG 53:1 TG 53:1 TG 53:1 TG 53:1 TG 53:1 TG 53:1 TG 53:1 TG 53:1 TG 53:1 TG 53:1 TG 53:1 TG 53:1 TG 53:1 TG 53:1 TG 53:1 TG 53:1 TG 53:1 TG 53:1 TG 53:1 TG 53:1 TG 53:1)	-	C56H106O6	892.825	30.46	TAG	Glycerolipids [GL]	6.5	-	-	354	410	416	385
(TG 53:0 TG 53:0 TG 53:0 TG 53:0 TG 53:0 TG 53:0 TG 53:0 TG 53:0 TG 53:0 TG 53:0 TG 53:0 TG 53:0 TG 53:0 TG 53:0 TG 53:0 TG 53:0 TG 53:0)	-	C56H108O6	894.84	31.5	TAG	Glycerolipids [GL]	5.9	-	-	292	322	387	372
(TG 51:7 TG 51:7 TG 51:7 TG 51:7 TG 51:7 TG 51:7 TG 51:7 TG 51:7 TG 51:7 TG 51:7 TG 51:7 TG 51:7 TG 51:7 TG 51:7 TG 51:7 TG 51:7 TG 51:7 TG 51:7 TG 51:7 TG 51:7 TG 51:7)	-	C54H90O6	852.698	22.9	TAG	Glycerolipids [GL]	2.2	-	-	137	118	261	317
(TG 48:1 TG 48:1 TG 48:1 TG 48:1 TG 48:1 TG 48:1 TG 48:1 TG 48:1 TG 48:1 TG 48:1 TG 48:1 TG 48:1 TG 48:1 TG 48:1 TG 48:1 TG 48:1 TG 48:1 TG 48:1 TG 48:1 TG 48:1 TG 48:1 TG 48:1 TG 48:1 TG 48:1 TG 48:1 TG 48:1 TG 48:1 TG 48:1 TG 48:1 TG 48:1 TG 48:1 TG 48:1)	-	C51H96O6	822.754	29.86	TAG	Glycerolipids [GL]	0.1	-	-	505	531	560	513
(TG 47:0 TG 47:0 TG 47:0 TG 47:0 TG 47:0 TG 47:0 TG 47:0 TG 47:0 TG 47:0 TG 47:0 TG 47:0 TG 47:0 TG 47:0 TG 47:0 TG 47:0)	-	C50H96O6	810.757	30.17	TAG	Glycerolipids [GL]	1.4	-	-	332	354	559	404
(TG 43:0 TG 43:0 TG 43:0 TG 43:0 TG 43:0 TG 43:0 TG 43:0 TG 43:0)	-	C46H88O6	754.689	20.35	TAG	Glycerolipids [GL]	1	-	-	116	172	157	182
(ST 32:6;O9)	-	C32H46O9	592.344	16.93	ST	Sterol Lipids [ST]	3.2	-	-	3320	4870	3720	3940
(ST 30:5;O7;Hex)	-	C36H54O12	696.398	17.07	ST	Sterol Lipids [ST]	2.9	-	-	3610	5600	4400	4460
(ST 30:5;O5)	-	C30H44O5	502.347	18.17	ST	Sterol Lipids [ST]	8.4	-	-	1210	1230	998	1140
(ST 30:4;O3 ST 30:4;O3)	-	C30H46O3	455.341	18.9	ST	Sterol Lipids [ST]	8.7	-	-	815	1150	615	725
(ST 29:4;O)	-	C29H44O	409.349	18.88	ST	Sterol Lipids [ST]	6	-	-	84.1	104	214	205
(ST 29:2;O4)	-	C29H48O4	478.39	19.58	ST	Sterol Lipids [ST]	5.2	-	-	486	542	429	492
(ST 29:2;O2 ST 29:2;O2 ST 29:2;O2 ST 29:2;O2 ST 29:2;O2 ST 29:2;O2 ST 29:2;O2 ST 29:2;O2 ST 29:2;O2 ST 29:2;O2 ST 29:2;O2 ST 29:2;O2 ST 29:2;O2 ST 29:2;O2 ST 29:2;O2)	-	C29H48O2	429.371	20.55	ST	Sterol Lipids [ST]	2	-	-	1200	1830	1490	1610
(ST 28:3;O ST 28:3;O ST 28:3;O ST 28:3;O ST 28:3;O ST 28:3;O ST 28:3;O ST 28:3;O)	-	C28H44O	414.375	20.64	ST	Sterol Lipids [ST]	1.4	-	-	553	947	745	708
(ST 27:3;O4;GlcA)	-	C33H50O10	607.343	16.92	ST	Sterol Lipids [ST]	6.3	-	-	2020	3030	2500	2480
(ST 27:3;O ST 27:3;O ST 27:3;O ST 27:3;O ST 27:3;O ST 27:3;O ST 27:3;O ST 27:3;O)	-	C27H42O	383.327	19.8	ST	Sterol Lipids [ST]	6.8	-	-	1630	2450	1900	1870
(ST 27:3;O ST 27:3;O ST 27:3;O ST 27:3;O ST 27:3;O ST 27:3;O ST 27:3;O ST 27:3;O)	-	C27H42O	383.327	24.54	ST	Sterol Lipids [ST]	0	-	-	760	807	873	864
(ST 27:2;O6 ST 27:2;O6 ST 27:2;O6 ST 27:2;O6 ST 27:2;O6 ST 27:2;O6 ST 28:1;O6 ST 27:2;O6 ST 27:2;O6)	-	C27H44O6	465.31	18.08	ST	Sterol Lipids [ST]	6.2	-	-	1110	403	146	226
(ST 27:2;O4 ST 27:2;O4 ST 27:2;O4 ST 27:2;O4 ST 27:2;O4 ST 27:2;O4 ST 27:2;O4 ST 27:2;O4 ST 27:2;O4 ST 27:2;O4 ST 27:2;O4 ST 27:2;O4 ST 27:2;O4 ST 27:2;O4 ST 27:2;O4 ST 28:1;O4 ST 27:2;O4 ST 27:2;O4 ST 27:2;O4 ST 27:2;O4 ST 27:2;O4 ST 27:2;O4 ST 27:2;O4 ST 27:2;O4 ST 27:2;O4)	-	C27H44O4	433.332	20.6	ST	Sterol Lipids [ST]	0.8	-	-	1350	1880	1630	1670
(ST 27:1;O;Hex ST 27:1;O;Hex ST 27:1;O;Hex ST 27:1;O;Hex)	-	C33H56O6	566.455	19.7	ST	Sterol Lipids [ST]	4.6	-	-	392	320	450	109
(ST 27:1;O ST 27:1;O ST 27:1;O ST 27:1;O ST 27:1;O ST 27:1;O ST 27:1;O ST 27:1;O ST 27:1;O ST 27:1;O ST 27:1;O ST 27:1;O ST 27:1;O ST 27:1;O)	-	C27H46O	387.363	21.16	ST	Sterol Lipids [ST]	2.1	-	-	155	531	498	347
(ST 27:0;O;Hex)	-	C33H58O6	568.458	19.22	ST	Sterol Lipids [ST]	0.5	-	-	473	456	495	536
(ST 26:6;O7 ST 26:6;O7 ST 26:6;O7)	-	C26H34O7	459.239	15.67	ST	Sterol Lipids [ST]	1.9	-	-	1390	108	1440	97.7
(ST 26:1;O5 ST 26:1;O5 ST 26:1;O5 ST 26:1;O5 ST 26:1;O5 ST 26:1;O5)	-	C26H44O5	454.345	18.59	ST	Sterol Lipids [ST]	3.8	-	-	478	367	271	335
(ST 25:1;O3)	-	C25H42O3	408.35	18.84	ST	Sterol Lipids [ST]	7	-	-	177	349	250	585
(ST 24:6;O6)	-	C24H30O6	432.238	16.83	ST	Sterol Lipids [ST]	0	-	-	13100	19600	13400	13900
(ST 24:1;O4;GlcA ST 24:1;O4;GlcA ST 24:1;O4;GlcA ST 24:1;O4;GlcA ST 24:1;O4;GlcA ST 24:1;O4;GlcA)	-	C30H48O10	586.355	17.06	ST	Sterol Lipids [ST]	0.2	-	-	1810	664	1800	642
(ST 24:0;O4;S)	-	C24H42O7S	492.303	17.3	ST	Sterol Lipids [ST]	4.2	-	-	142	195	213	393
(ST 24:0;O4 ST 24:0;O4 ST 24:0;O4)	-	C24H42O4	395.315	18.14	ST	Sterol Lipids [ST]	4.7	-	-	1030	1060	450	1250
(ST 21:3;O5 ST 21:3;O5 ST 21:3;O5 ST 21:3;O5 ST 21:3;O5 ST 21:3;O5 ST 21:3;O5 ST 21:3;O5)	-	C21H30O5	363.215	15.84	ST	Sterol Lipids [ST]	2.8	-	-	1400	1950	2040	1400
(SM 40:1;O2 SM 40:1;O2)	-	C45H91N2O6P	787.668	26.64	SM	Sphingolipids [SP]	0.7	-	-	283	264	231	212
(PS O39:1 PS O39:1 PS O39:1)	-	C45H88NO9P	835.638	22.12	PS	Glycerophospholipids [GP]	0.7	-	-	364	42.4	121	84
(PS O36:6)	-	C42H72NO9P	766.502	17.71	PS	Glycerophospholipids [GP]	0	-	-	84.2	524	74	96.3
(PS O36:2 PS O36:2 PS O36:2 PS O36:2 PS O36:2)	-	C42H80NO9P	791.589	21.45	PS	Glycerophospholipids [GP]	1.7	-	-	57.7	44.3	99.9	19.2
(PS O35:2 PS O35:2 PS O35:2 PS O35:2)	-	C41H78NO9P	777.573	17.69	PS	Glycerophospholipids [GP]	0.3	-	-	34600	48900	31500	38400
(PS O31:0 PS O31:0)	-	C37H74NO9P	725.543	20.97	PS	Glycerophospholipids [GP]	1.4	-	-	727	1150	1700	2130
(PS O30:1 PS O30:1 PS O30:1)	-	C36H70NO9P	709.507	22.39	PS	Glycerophospholipids [GP]	7.2	-	-	855	1220	932	862
(PS O29:0 LPS O29:1;O)	-	C35H70NO9P	680.479	22.4	PS	Glycerophospholipids [GP]	7.8	-	-	202000	340000	237000	228000
(PS O28:1)	-	C34H66NO9P	664.453	22.74	PS	Glycerophospholipids [GP]	0.5	-	-	47200	78000	56700	53500
(PS 42:7 PS 42:7 PS 42:7 PS 42:7 PS 42:7 PS 42:7)	-	C48H80NO10P	879.581	19.58	PS	Glycerophospholipids [GP]	1.7	-	-	1080	1340	919	891
(PS 42:0 PS 42:0 PS 42:0)	-	C48H94NO10P	893.695	27.55	PS	Glycerophospholipids [GP]	0.3	-	-	145	169	185	171
(PS 37:5 PS 37:5 PS 37:5 PS 37:5 PS 37:5 PS 37:5 PS 37:5 PS 37:5 PS 37:5 PS 37:5)	-	C43H74NO10P	813.535	20.99	PS	Glycerophospholipids [GP]	4.2	-	-	123	175	340	338
(PS 37:1 PS 37:1 PS 37:1 PS 37:1 PS 37:1 PS 37:1 PS 37:1 PS 37:1 PS 37:1 PS 37:1 PS 37:1 PS 37:1 PS 37:1 PS 37:1)	-	C43H82NO10P	821.595	17.63	PS	Glycerophospholipids [GP]	4.8	-	-	23600	34700	22500	29500
(PS 34:1 PS 34:1 PS 34:1 PS 34:1 PS 34:1 PS 34:1 PS 34:1 PS 34:1 PS 34:1 PS 34:1 PS 34:1 PS 34:1 PS 34:1 PS 34:1 PS 34:1 PS 34:1 PS 34:1)	-	C40H76NO10P	779.562	17.72	PS	Glycerophospholipids [GP]	1.2	-	-	127	930	1680	1540
(PS 32:4 PS 32:4 PS 32:4 PS 32:4 PS 32:4 PS 32:4 PS 32:4 PS 32:4)	-	C38H66NO10P	745.472	17.41	PS	Glycerophospholipids [GP]	0.6	-	-	63.6	30.9	31.1	42.3
(PS 32:3 PS 32:3 PS 32:3 PS 32:3 PS 32:3 PS 32:3 PS 32:3 PS 32:3 PS 32:3 PS 32:3 PC 30:4;O2)	-	C38H68NO10P	730.457	17.37	PS	Glycerophospholipids [GP]	2.3	-	-	112	222	271	190
(PS 30:0 PS 30:0 PS 30:0 PS 30:0 PS 30:0 PS 30:0 PS 30:0)	-	C36H70NO10P	725.503	18.7	PS	Glycerophospholipids [GP]	6.7	-	-	264	685	318	487
(PS 27:1 PS 27:1 PS 27:1 PS 27:1 PE 28:2;O2)	-	C33H62NO10P	664.405	17.27	PS	Glycerophospholipids [GP]	0.9	-	-	56.6	63.2	28.8	90.4
(PS 20:0 PE 21:1;O2)	-	C26H50NO10P	568.327	16.4	PS	Glycerophospholipids [GP]	1.7	-	-	3420	5990	5110	5230
(PICer 44:0;O4 PICer 44:0;O4)	-	C50H100NO13P	971.73	27.01	PI	Glycerophospholipids [GP]	0.6	-	-	577	697	831	820
(PI O42:7)	-	C51H87O12P	940.634	23.25	PI	Glycerophospholipids [GP]	3.1	-	-	136	235	216	247
(PI O40:3 PI O40:3 PI O40:3)	-	C49H91O12P	920.646	18.74	PI	Glycerophospholipids [GP]	0.4	-	-	95.1	162	103	125
(PI O37:1 PI O37:1 PI O37:1 PI O37:1 PI O37:1)	-	C46H89O12P	865.619	17.61	PI	Glycerophospholipids [GP]	0.8	-	-	14500	22000	15800	20200
(PI O36:1 PI O36:1 PI O36:1 PI O36:1 PI O36:1 PI O36:1)	-	C45H87O12P	851.597	17.6	PI	Glycerophospholipids [GP]	2.6	-	-	123	175	116	140
(PI O34:4 PI O34:4 PI O34:4)	-	C43H77O12P	834.556	17.58	PI	Glycerophospholipids [GP]	0.3	-	-	333	6390	69	1320
(PI O30:1 PI O30:1 PI O30:1)	-	C39H75O12P	767.494	17.69	PI	Glycerophospholipids [GP]	0.9	-	-	43.3	77.9	46.6	23.5
(PI 41:7 PI 41:7)	-	C50H83O13P	940.588	19.07	PI	Glycerophospholipids [GP]	1.5	-	-	212	263	201	166
(PI 41:7 PI 41:7)	-	C50H83O13P	923.555	17.32	PI	Glycerophospholipids [GP]	5.8	-	-	43	50.3	48.1	45.2
(PI 41:4 PI 41:4 PI 41:4 PI 41:4)	-	C50H89O13P	929.611	19.19	PI	Glycerophospholipids [GP]	0.2	-	-	75.7	87.3	73.2	97.4
(PI 40:6 PI 40:6 PI 40:6 PI 40:6 PI 40:6 PI 40:6 PI 40:6 PI 40:6 PI 40:6 PI 40:6 PI 40:6)	-	C49H83O13P	911.573	19.71	PI	Glycerophospholipids [GP]	0.5	-	-	308	442	263	157
(PI 40:3 PI 40:3 PI 40:3 PI 40:3 PI 40:3 PI 40:3 PI 40:3 PI 40:3 PI 40:3 PI 40:3 PI 40:3 PI 40:3)	-	C49H89O13P	934.634	20.23	PI	Glycerophospholipids [GP]	1.7	-	-	3640	5950	2860	2830
(PI 40:1 PI 40:1 PI 40:1 PI 40:1 PI 40:1 PI 40:1 PI 40:1 PI 40:1)	-	C49H93O13P	938.678	18.25	PI	Glycerophospholipids [GP]	9	-	-	137	185	122	120
(PI 38:3 PI 38:3 PI 38:3 PI 38:3 PI 38:3 PI 38:3 PI 38:3 PI 38:3 PI 38:3 PI 38:3 PI 38:3 PI 38:3)	-	C47H85O13P	906.602	20.86	PI	Glycerophospholipids [GP]	3.4	-	-	945	2090	4500	4210
(PI 36:3 PI 36:3 PI 36:3 PI 36:3 PI 36:3 PI 36:3 PI 36:3 PI 36:3 PI 36:3 PI 36:3 PI 36:3 PI 36:3 PI 36:3 PI 36:3)	-	C45H81O13P	878.571	17.53	PI	Glycerophospholipids [GP]	2.1	-	-	130	171	38.9	31.2
(PI 30:4 PI 30:4)	-	C39H67O13P	775.44	16.99	PI	Glycerophospholipids [GP]	0.8	-	-	1600	567	1990	2190
(PI 28:2)	-	C37H67O13P	751.43	18.12	PI	Glycerophospholipids [GP]	0.1	-	-	293	370	432	408
(PG O37:3)	-	C43H81O9P	790.597	21.6	PG	Glycerophospholipids [GP]	2.7	-	-	90.2	35.9	139	526
(PG O34:4 PG O34:4 PG O34:4 PG O34:4)	-	C40H73O9P	746.524	17.74	PG	Glycerophospholipids [GP]	4.2	-	-	9580	11600	7930	9630
(PG 44:5 PG 44:5)	-	C50H89O10P	881.611	20.16	PG	Glycerophospholipids [GP]	1	-	-	60.8	104	739	815
(PG 43:4 PG 43:4)	-	C49H89O10P	886.656	19.49	PG	Glycerophospholipids [GP]	3.9	-	-	102	163	93.2	83.6
(PG 42:7 PG 42:7 PG 42:7 PG 42:7 PG 42:7 PG 42:7)	-	C48H81O10P	866.592	17.55	PG	Glycerophospholipids [GP]	0.3	-	-	44.3	32.4	21.3	99.3
(PG 42:5 PG 42:5 PG 42:5 PG 42:5 PG 42:5 PG 42:5 PG 42:5 PG 42:5)	-	C48H85O10P	870.639	19.44	PG	Glycerophospholipids [GP]	1	-	-	284	347	133	91.3
(PG 40:6 PG 40:6 PG 40:6 PG 40:6 PG 40:6 PG 40:6 PG 40:6 PG 40:6 PG 40:6 PG 40:6 PG 40:6)	-	C46H79O10P	823.548	17.55	PG	Glycerophospholipids [GP]	0.8	-	-	61.9	62.9	40.5	24.4
(PG 38:7 PG 38:7 PG 38:7 PG 38:7 PG 38:7 PG 38:7 PG 38:7 PG 38:7 PG 38:7 PG 38:7)	-	C44H73O10P	810.513	17.62	PG	Glycerophospholipids [GP]	1.9	-	-	179	90.4	51.5	94.9
(PG 32:5 PG 32:5 PG 32:5 PG 32:5)	-	C38H65O10P	713.433	19.2	PG	Glycerophospholipids [GP]	1	-	-	82.5	796	757	102
(PC O40:7)	-	C48H84NO7P	818.604	21.73		Glycerophospholipids [GP]	0.4	-	-	179	403	434	371
(PC O38:5 PC O38:5 PC O38:5 PC O38:5 PC O38:5 PC O38:5 PC O38:5)	-	C46H84NO7P	811.619	21.5	PC	Glycerophospholipids [GP]	1.1	-	-	4.58	72.7	480	845
(PC O38:3 PC O38:3 PC O38:3 PC O38:3 PC O38:3 PC O38:3)	-	C46H88NO7P	815.654	21.99	PC	Glycerophospholipids [GP]	0.4	-	-	21.6	56.3	6230	5080
(PC O34:5)	-	C42H76NO7P	755.575	21.93	PC	Glycerophospholipids [GP]	5.7	-	-	682	1350	3470	3210
(PC O33:2 PC O33:2 PC O33:2 PE O36:2 PE O36:2 PE O36:2 PE O36:2 PE O36:2)	-	C41H80NO7P	747.596	21.63		Glycerophospholipids [GP]	2.3	-	-	2080	3380	10600	11500
(PC O31:1 PC O31:1 PC O31:1 PE O34:1 PE O34:1 PE O34:1 PE O34:1 PE O34:1 PE O34:1)	-	C39H78NO7P	721.588	21.54		Glycerophospholipids [GP]	1	-	-	2010	3080	7960	8830
(PC O21:1 LPE 24:1 LPE 24:1)	-	C29H58NO7P	581.435	19.53		Glycerophospholipids [GP]	1.6	-	-	286	293	245	218
(PC 44:2 PC 44:2 PC 44:2 PC 44:2 PC 44:2)	-	C52H100NO8P	898.734	28.81	PC	Glycerophospholipids [GP]	6	-	-	308	102	608	705
(PC 42:0 PC 42:0 PC 42:0 PC 42:0 PC 42:0 PC 42:0)	-	C50H100NO8P	874.726	24.12	PC	Glycerophospholipids [GP]	0.4	-	-	85.1	114	216	148
(PC 40:8 PC 40:8 PC 40:8 PC 40:8 PC 40:8 PC 40:8 PC 40:8 PC 40:8)	-	C48H80NO8P	847.596	18.95	PC	Glycerophospholipids [GP]	1.4	-	-	169	229	162	183
(PC 37:7 PC 37:7 PC 37:7 PC 37:7 PE 40:7 PE 40:7 PE 40:7 PE 40:7 PE 40:7 PE 40:7 PE 40:7 PE 40:7 PE 40:7 PE 40:7)	-	C45H76NO8P	807.565	19.79		Glycerophospholipids [GP]	0.1	-	-	3620	4120	4660	4010
(PC 37:6 PC 37:6 PC 37:6 PC 37:6 PC 37:6 PC 37:6 PE 40:6 PE 40:6 PE 40:6 PE 40:6 PE 40:6 PE 40:6 PE 40:6 PE 40:6 PE 40:6 PE 40:6 PE 40:6 PE O40:7;O)	-	C45H78NO8P	809.584	21.17		Glycerophospholipids [GP]	2.5	-	-	673	1330	3460	3900
(PC 37:2 PC 37:2 PC 37:2 PC 37:2 PC 37:2 PC 37:2 PC 37:2 PC 37:2 PC 37:2 PC 37:2 PC 37:2 PC 37:2 PC 37:2 PC 37:2 PE 40:2 PE 40:2 PE 40:2 PE 40:2 PE 40:2 PE 40:2 PE 40:2 PE 40:2 PE 40:2)	-	C45H86NO8P	817.646	22.21		Glycerophospholipids [GP]	1.6	-	-	455	668	2030	2060
(PC 36:4 PC 36:4 PC 36:4 PC 36:4 PC 36:4 PC 36:4 PC 36:4 PC 36:4 PC 36:4 PC 36:4 PC 36:4 PC 36:4 PC 36:4 PC 36:4 PC 36:4 PC 36:4 PC 36:4 PC 36:4 PC 36:4 PC 36:4 PC 36:4 PC 36:4 PC 36:4 PC 36:4 PC 36:4 PC 36:4 PE 39:4 PE 39:4 PE 39:4 PE 39:4 PE 39:4 PE 39:4 PE 39:4 PE 39:4 PE 39:4 PE 39:4)	-	C44H80NO8P	799.59	20	PC	Glycerophospholipids [GP]	4.4	-	-	3650	5070	4490	5210
(PC 35:3 PC 35:3 PC 35:3 PC 35:3 PC 35:3 PC 35:3 PC 35:3 PC 35:3 PC 35:3 PC 35:3 PC 35:3 PC 35:3 PE 38:3 PE 38:3 PE 38:3 PE 38:3 PE 38:3 PE 38:3 PE 38:3 PE 38:3 PE 38:3 PE 38:3 PE 38:3 PE 38:3)	-	C43H80NO8P	787.603	21.38		Glycerophospholipids [GP]	7.6	-	-	5060	13000	42100	43500
(PC 32:3 PC 32:3 PC 32:3 PC 32:3 PC 32:3 PC 32:3 PC 32:3 PC 32:3 PC 32:3 PC 32:3 PE 35:3 PE 35:3 PE 35:3 PE 35:3 PE 35:3 PE 35:3 PE 35:3 PE 35:3 PE 35:3 PE 35:3 PE 35:3 PE 35:3)	-	C40H74NO8P	745.568	18.96		Glycerophospholipids [GP]	6.4	-	-	187	1060	423	413
(PC 27:1 PC 27:1 PC 27:1 PC 27:1 PE 30:1 PE 30:1 PE 30:1 PE 30:1 PE 30:1 PE 30:1 PE 30:1 PE 30:1 PE 30:1 PE 30:1)	-	C35H68NO8P	679.502	20.33		Glycerophospholipids [GP]	4.9	-	-	968	1260	2490	2690
(PA O42:7)	-	C45H77O7P	778.569	17.71	PA	Glycerophospholipids [GP]	4.1	-	-	9080	12600	8200	10000
(PA O36:5 PA O36:5 PA O36:5)	-	C39H69O7P	681.482	22.4	PA	Glycerophospholipids [GP]	3.2	-	-	80900	133000	95200	91100
(PA 41:2 PA 41:2 PA 41:2 PA 41:2 PA 41:2 PA 41:2)	-	C44H83O8P	771.584	21.6	PA	Glycerophospholipids [GP]	3.9	-	-	670	1480	4120	4010
(PA 41:1 PA 41:1 PA 41:1 PA 41:1 PA 41:1 PA 41:1)	-	C44H85O8P	773.602	21.78	PA	Glycerophospholipids [GP]	2.7	-	-	596	936	3400	3170
(PA 40:2 PA 40:2 PA 40:2 PA 40:2 PA 40:2 PA 40:2 PA 40:2 PA 40:2 PA 40:2)	-	C43H81O8P	757.583	21.79	PA	Glycerophospholipids [GP]	0.4	-	-	499	99.1	886	1160
(PA 38:3 PA 38:3 PA 38:3 PA 38:3 PA 38:3 PA 38:3 PA 38:3 PA 38:3 PA 38:3 PA 38:3 PA 38:3 PA 38:3)	-	C41H75O8P	744.552	18.84	PA	Glycerophospholipids [GP]	2.7	-	-	497	571	285	267
(PA 37:7 PA 37:7 PA 37:7 PA 37:7)	-	C40H65O8P	722.476	17.79	PA	Glycerophospholipids [GP]	0.5	-	-	367	75.3	88.2	136
(PA 36:0 PA 36:0 PA 36:0 PA 36:0 PA 36:0 PA 36:0 PA 36:0 PA 36:0 PA 36:0)	-	C39H77O8P	722.582	21.57	PA	Glycerophospholipids [GP]	1.8	-	-	31.8	902	2010	2220
(PA 34:2 PA 34:2 PA 34:2 PA 34:2 PA 34:2 PA 34:2 PA 34:2 PA 34:2 PA 34:2 PA 34:2 PA 34:2 PA 34:2 PA 34:2 PA 34:2 PA 34:2)	-	C37H69O8P	690.507	17.79	PA	Glycerophospholipids [GP]	2.2	-	-	14300	18600	11600	14300
(PA 33:3 PA 33:3 PA 33:3 PA 33:3 PA 33:3 PA 33:3 PA 33:3 PA 33:3 PA 33:3 PA 33:3)	-	C36H65O8P	657.442	17.6	PA	Glycerophospholipids [GP]	3.9	-	-	138	109	63.7	75.5
(PA 28:1 PA 28:1 PA 28:1 PA 28:1 PA 28:1 PA 28:1)	-	C31H59O8P	591.387	17.86	PA	Glycerophospholipids [GP]	0.6	-	-	95.3	152	119	64.8
(None,)	-	C97H188O14	1595.43	23.69			3.3	-	-	345	480	544	450
(None,)	-	C98H190O14	1592.43	23.68			4.7	-	-	813	1170	1420	1150
(None,)	-	C97H188O14	1578.42	28.96			3.5	-	-	511	904	1320	1200
(None,)	-	C77H126N2O23P2	1526.85	2.61			4.7	-	-	25.7	21.2	31.9	32.5
(None,)	-	C66H75O39	1509.42	29.68			1.3	-	-	70.8	89.8	133	127
(None,)	-	C66H75O39	1509.41	34.18			6.7	-	-	47.3	70.9	81.9	83.6
(None,)	-	C92H182O11	1481.39	29.16			3.7	-	-	84.6	111	147	144
(None,)	-	C68H122N2O31	1480.84	2.61			3.9	-	-	26.6	31.6	33	36.2
(None,)	-	C105H172O	1467.38	28.87			3	-	-	69.2	95.4	125	115
(None,)	-	C77H140O17P2	1416.99	24.36			2.8	-	-	65.8	81.9	150	154
(None,)	-	C67H119N3O26	1399.84	2.64			2.1	-	-	35.8	32.8	37.2	34.4
(None,)	-	C100H164O	1399.31	24.27			0.7	-	-	57.6	47.6	43.2	54.1
(None,)	-	C64H111N11O20	1371.83	2.72			1	-	-	32.4	26	32.2	40.6
(None,)	-	C68H129N2O20P	1342.93	22.34			2.8	-	-	142000	208000	163000	163000
(None,)	-	C95H156O	1331.24	2.69			4.3	-	-	31.3	34.4	34.3	53.4
(None,)	-	C62H88CoN13O14P	1329.58	23.96			3.8	-	-	37.2	54.2	44.2	51.7
(None,)	-	C71H126O17P2	1313.86	49.33			1.3	-	-	259	406	751	647
(None,)	-	C59H110N6NaO20P	1294.77	2.76			2.7	-	-	31.4	28.9	42.6	48.2
(None,)	-	C49H64N9O30P	1290.35	29.53			1.6	-	-	30.8	41.3	49.7	50.5
(None,)	-	C67H122O17P2	1278.85	46.9			2.3	-	-	550	901	2100	1660
(None,)	-	C80H132O7P2	1267.96	22.59			0.6	-	-	178	187	123	113
(None,)	-	C64H118N2O21	1251.84	2.71			1.3	-	-	33.2	37.1	30.8	36
(None,)	-	C52H74N16O15S2	1244.53	2.76			1.5	-	-	24.6	26.6	30.8	36.1
(None,)	-	C60H86N16O13	1239.66	2.69			1.1	-	-	31.5	21.6	23.6	26.1
(None,)	-	C44H69N8O22P3S2	1236.36	23.07			2.7	-	-	560	1160	2310	2290
(None,)	-	C62H117N3O15P2	1223.84	2.75			4.6	-	-	35.9	34.2	46.8	40.1
(None,)	-	C63H114O17P2	1222.79	21.4			0.6	-	-	121	312	222	192
(None,)	-	C62H116O17P2	1212.81	21.1			8	-	-	3170	7820	5260	5390
(None,)	-	C64H107NO16P2	1208.71	19.43			1.9	-	-	117	163	117	109
(None,)	-	C42H65N8O22P3S2	1208.33	25.72			2.9	-	-	690	1080	1330	1300
(None,)	-	C61H118O17P2	1202.83	42.72			7.1	-	-	339	555	988	1150
(None,)	-	C55H38O31	1195.16	29.63			7.5	-	-	161	214	274	268
(None,)	-	C61H115N3O15P2	1192.8	25.19			7.8	-	-	232	366	494	442
(None,)	-	C54H59O28	1173.34	43.53			7	-	-	144	236	824	621
(None,)	-	C40H61N8O22P3S2	1163.26	2.7			4.1	-	-	38.8	37.3	36.2	38.7
(None,)	-	C59H88N2O20	1162.63	17.1			2.7	-	-	606	1080	758	801
(None,)	-	C55H82O22S2	1159.48	16.92			0.8	-	-	32.3	36.6	37.3	36.5
(None,)	-	C58H108O17P2	1156.74	20.32			0.7	-	-	290	621	364	316
(None,)	-	C41H62N7O22P3S	1147.32	21.79			1.5	-	-	3560	5740	6940	5050
(None,)	-	C55H102N2O21	1144.72	20.27			1.8	-	-	171	303	178	167
(None,)	-	C55H82O21S2	1143.49	16.96			0.2	-	-	37.9	41.3	42.7	37.2
(None,)	-	C49H62N10O16S3	1143.36	26.2			0.1	-	-	75.5	107	144	136
(None,)	-	C54H92O24	1142.62	17.07			6.4	-	-	651	1180	809	844
(None,)	-	C50H60O30	1141.31	25.12			5.5	-	-	64.6	88.8	76.8	89.3
(None,)	-	C41H64N7O22P3S	1132.31	25.2			0.9	-	-	2600	4590	5430	5300
(None,)	-	C56H104O17P2	1128.7	25.24			1.9	-	-	55.2	41.5	51.2	57.6
(None,)	-	C52H54O27	1128.32	25.19			2.6	-	-	6370	11600	14300	14000
(None,)	-	C63H113O13P	1126.82	22.04			0.6	-	-	220	378	321	339
(None,)	-	C59H84N2O18	1126.61	17.04			6	-	-	738	1180	908	941
(None,)	-	C56H105N3O15P2	1122.71	18.79			2	-	-	80.9	128	114	132
(None,)	-	C54H88O23	1122.61	17.07			3.5	-	-	729	1260	861	954
(None,)	-	C48H57O29	1115.33	22.87			0.1	-	-	60.5	101	107	79.8
(None,)	-	C53H96N2O21	1114.69	19.44			0.4	-	-	157	216	75.5	113
(None,)	-	C45H60O31	1114.34	22.8			0.5	-	-	58.8	88.7	111	92.7
(None,)	-	C53H88O23	1110.61	17.05			0.1	-	-	778	1250	941	1010
(None,)	-	C54H86O22	1104.6	17.11			5.4	-	-	854	1420	983	1070
(None,)	-	C50H54N8O12S4	1104.31	26.8			3	-	-	119	181	193	175
(None,)	-	C53H86O22	1092.6	17.07			1	-	-	887	1560	1130	1190
(None,)	-	C32H57N9O23P4S	1092.23	24.1			1.5	-	-	148	301	285	272
(None,)	-	C60H94O16	1088.68	19.5			1.1	-	-	79.1	124	109	77.6
(None,)	-	C50H53O26	1087.32	22.38			0.5	-	-	704	1190	1350	1280
(None,)	-	C48H30O30	1087.09	26.41			1.6	-	-	232	203	194	217
(None,)	-	C48H28O30	1085.07	26			1.1	-	-	157	92.8	97.7	121
(None,)	-	C46H54O28	1072.3	21.45			9.4	-	-	3420	6900	8110	5330
(None,)	-	C63H108NO9P	1071.81	28.52			1.3	-	-	94.7	188	348	358
(None,)	-	C51H85N7O16	1069.65	19.31			3.6	-	-	252	268	193	228
(None,)	-	C62H48O17	1065.29	24.22			6	-	-	64.9	98.1	109	98.2
(None,)	-	C48H54O27	1063.3	26.35			4.3	-	-	177	266	269	261
(None,)	-	C69H132O5	1059.04	25.97			2.2	-	-	83.6	80.1	67.2	68.9
(None,)	-	C58H80O16	1050.57	17.03			2.4	-	-	1110	1790	1350	1450
(None,)	-	C53H87NO19	1042.6	17.18			1.7	-	-	842	267	480	975
(None,)	-	C57H85N9O9	1040.65	19.5			4.3	-	-	594	761	649	598
(None,)	-	C45H85O19P3	1040.53	16.09			2.3	-	-	32.1	150	93.9	92.9
(None,)	-	C46H51O26	1037.29	27.93			2.9	-	-	18	34	66.9	70.5
(None,)	-	C57H108O14	1034.8	27.91			0.8	-	-	99.4	219	386	413
(None,)	-	C52H85N3O13P2	1022.56	17.08			0.9	-	-	1090	1710	1280	1350
(None,)	-	C56H106O14	1020.8	25.92			2.5	-	-	129	181	208	186
(None,)	-	C50H83NO20	1018.56	17.06			1.4	-	-	1350	2220	1670	1780
(None,)	-	C44H50O26	1012.3	21.99			5.9	-	-	1210	3110	3950	3590
(None,)	-	C56H106O13	1004.8	22.79			5.9	-	-	312	431	366	315
(None,)	-	C49H71N13O10	1002.55	17.09			0.8	-	-	1450	2270	1720	1820
(None,)	-	C57H108O13	1001.79	22.65			0.6	-	-	7110	10400	6100	5900
(None,)	-	C50H78O19	1000.55	17.09			5	-	-	1490	2350	1700	1870
(None,)	-	C37H58N7O17P3S	998.285	21.13			3.5	-	-	4260	8950	9900	6440
(None,)	-	C54H94NO12P	997.691	17.54			5.1	-	-	1690	3140	1850	2220
(None,)	-	C63H115D5O6	995.969	36.49			3.7	-	-	3910	8340	12100	11300
(None,)	-	C65H89D5O6	993.77	25.91			0.1	-	-	23100	40800	53000	52900
(None,)	-	C49H100O14P2	992.699	18.91			4	-	-	69.5	64.1	110	75.2
(None,)	-	C55H104O13	990.784	25.52			1.7	-	-	807	1170	1210	1140
(None,)	-	C44H71N13O13	990.544	17.06			6.2	-	-	1440	2290	1740	1760
(None,)	-	C70H114O	988.915	33.93			2.6	-	-	488	209	335	416
(None,)	-	C65H109O4P	985.817	30.58			2.2	-	-	75.7	116	130	118
(None,)	-	C54H106NO10P	977.787	30.84			1	-	-	189	214	246	224
(None,)	-	C47H80O19	966.569	17.2			2.8	-	-	205	93.8	5.48	47
(None,)	-	C51H46O19	963.274	32.4			0.1	-	-	20.2	29.9	32.7	29.1
(None,)	-	C47H76O19	962.532	17			0.3	-	-	1600	2560	1960	2050
(None,)	-	C44H81NO21	960.529	17.01			6.9	-	-	1820	2940	2220	2280
(None,)	-	C34H56N7O17P3S	960.278	26.85			1.3	-	-	103	217	428	442
(None,)	-	C61H99D5O6	955.847	29.22			0	-	-	15800	30600	40000	38000
(None,)	-	C31H54N7O18P3S	955.271	25.16			8.9	-	-	375	531	543	530
(None,)	-	C43H48CoN4O16	953.273	25.12			0.5	-	-	813	1190	1230	1190
(None,)	-	C39H50O26	952.295	22.69			1.4	-	-	213	577	671	679
(None,)	-	C61H93D5O6	949.801	26.99			0.3	-	-	19000	35000	47900	45800
(None,)	-	C48H80O13P2	944.529	17.07			6.2	-	-	1880	3100	2300	2410
(None,)	-	C52H76O14	942.551	17.28			2.5	-	-	110	158	345	223
(None,)	-	C52H72O14	938.518	17			6	-	-	1640	2670	1970	2130
(None,)	-	C48H73N11O8	932.569	18.38			0.8	-	-	321	270	249	190
(None,)	-	C44H74O19	924.537	18.32			0.2	-	-	1390	347	279	2260
(None,)	-	C41H45O23	923.27	26.32			0.1	-	-	130	272	504	531
(None,)	-	C34H45N6O21P	922.258	22.87			3.3	-	-	66.7	135	186	149
(None,)	-	C60H118O5	919.908	29.4			1.2	-	-	79.1	71.9	82.5	79.9
(None,)	-	C53H106NO8P	916.767	24.77			6	-	-	1080	1510	1590	1550
(None,)	-	C57H100O7	914.784	33.22			0.4	-	-	122	190	455	443
(None,)	-	C47H88O15	910.65	17.58			3.1	-	-	2280	3660	2560	3140
(None,)	-	C40H44O23	910.254	31.65			6.1	-	-	98.3	151	219	206
(None,)	-	C51H91NO10P	909.65	17.59			6.8	-	-	7720	12300	8600	10500
(None,)	-	C48H74O15	908.541	18.97			3.4	-	-	405	551	377	391
(None,)	-	C29H47N7O17P3S	908.233	21.86			2.1	-	-	428	750	885	656
(None,)	-	C50H76NO10P	899.537	17.41			3	-	-	41.1	82.9	135	105
(None,)	-	C55H68N4O6	898.543	17.45			6.6	-	-	41	65.5	73.7	55.6
(None,)	-	C47H68O15	890.495	17.01			4.7	-	-	1730	2920	2170	2220
(None,)	-	C57H104O5	886.814	30.79			7.6	-	-	134	277	429	370
(None,)	-	C45H40O18	886.26	25.88			3.6	-	-	139	279	523	554
(None,)	-	C56H96O7	881.722	26.63			1.9	-	-	314	459	827	756
(None,)	-	C32H54CuN12O12	879.353	29.27			1.6	-	-	84	367	436	294
(None,)	-	C26H38N7O17P3S2	878.101	29.06			2	-	-	39.5	60.4	78.8	52.6
(None,)	-	C44H72O17	873.486	17.02			1	-	-	1400	2070	1590	1720
(None,)	-	C41H43NO20	870.248	30.66			1.4	-	-	546	868	1370	1210
(None,)	-	C54H97D5O6	869.832	29.14			0	-	-	12900	25400	33600	32000
(None,)	-	C54H90O7	868.696	20.49			6.5	-	-	77.2	176	131	104
(None,)	-	C42H76O13P2	868.495	17.08			6.4	-	-	1060	3020	2350	2500
(None,)	-	C47H78O14	867.541	17.41			2	-	-	26.7	69.1	38.5	52.9
(None,)	-	C58H89NO3	865.712	20.52			0.5	-	-	238	273	221	224
(None,)	-	C39H42O21	864.261	21.28			3.7	-	-	867	2560	2730	2220
(None,)	-	C46H54O16	863.352	28.49			5.2	-	-	26.4	22.1	25.7	24.8
(None,)	-	C53H94O7	860.731	24.3			1.8	-	-	237	230	246	252
(None,)	-	C53H97D5O6	857.832	29.6			0.5	-	-	14600	27600	41100	38200
(None,)	-	C54H96O7	857.724	28.34			0.3	-	-	91.2	95.3	137	116
(None,)	-	C47H66O13	856.49	17.13			1.7	-	-	2070	2790	2450	2120
(None,)	-	C45H68N6O9	854.532	17.53			1.5	-	-	58.4	46.8	64.6	62.5
(None,)	-	C60H98O	852.792	28.89			3.4	-	-	2750	3670	3480	3390
(None,)	-	C42H63N5O10S	847.462	16.89			0.7	-	-	1700	2730	2120	2210
(None,)	-	C42H66O16	844.463	16.99			5.9	-	-	2190	3840	2900	3100
(None,)	-	C55H100O5	841.762	30.79			0.7	-	-	56	99.2	90.3	61.6
(None,)	-	C46H65NO12	841.477	17.22			3.3	-	-	969	1480	1340	1030
(None,)	-	C44H71NO13	839.527	23.76			0.4	-	-	117	216	397	374
(None,)	-	C47H67NO12	838.468	17.04			6.1	-	-	2160	3340	2650	2690
(None,)	-	C42H78N2O14	835.544	17.54			2.6	-	-	31.9	89.4	20.5	63.4
(None,)	-	C37H60N4O16	834.441	15.94			5.5	-	-	132	323	304	196
(None,)	-	C34H36N6O14S2	834.219	21.75			6.6	-	-	369	761	777	502
(None,)	-	C45H36O15	834.237	29.77			2.3	-	-	460	615	887	843
(None,)	-	C42H72O16	833.493	17.17			0.8	-	-	117	140	122	95.3
(None,)	-	C45H60N4O11	833.433	15.94			1.3	-	-	106	170	44.9	78.3
(None,)	-	C46H40O15	833.24	23.34			4.1	-	-	4860	7890	12500	11600
(None,)	-	C46H40O15	833.238	29.77			7	-	-	599	811	1180	1120
(None,)	-	C39H43O20	832.239	23.34			3.2	-	-	6230	10200	17000	15700
(None,)	-	C39H43O20	832.237	29.8			5.9	-	-	343	419	599	546
(None,)	-	C32H51N11O13S	830.35	27.47			1.3	-	-	17.7	77.1	154	151
(None,)	-	C42H68O16	829.462	17			4.1	-	-	1630	2530	2020	2130
(None,)	-	C51H86O7	828.672	22.67			0.9	-	-	389	567	1110	1020
(None,)	-	C44H62N2O12	828.462	16.99			1.6	-	-	2860	4550	3570	3690
(None,)	-	C51H91D5O6	827.783	27.51			0	-	-	14500	26700	35400	33400
(None,)	-	C51H84O7	826.658	22.37			1.4	-	-	408	683	1300	1220
(None,)	-	C43H68O15	825.472	17.18			6	-	-	910	1520	1210	862
(None,)	-	C57H86O3	819.672	20.42			8.3	-	-	208	203	164	177
(None,)	-	C38H41O19	819.25	26.66			3.3	-	-	47.9	64.9	92.5	102
(None,)	-	C42H72O14	818.512	17.12			0.4	-	-	205	295	543	277
(None,)	-	C35H44O21	818.266	21.33			2.4	-	-	187	387	420	272
(None,)	-	C49H60N4O7	817.453	17.03			0.5	-	-	1430	2050	1680	1720
(None,)	-	C41H64O15	814.451	16.49			0.7	-	-	2960	4640	3540	3720
(None,)	-	C36H44O21	813.239	25.02			4.6	-	-	120	217	446	468
(None,)	-	C22H36N7O17P3S	813.145	21.57			3.4	-	-	34.8	71.7	226	346
(None,)	-	C36H38O20	808.224	23.68			0.6	-	-	73.1	124	116	90.5
(None,)	-	C45H38O13	804.253	21.43			1.2	-	-	109	395	386	393
(None,)	-	C39H63NO15	803.449	17.01			5.4	-	-	1550	2350	1900	1940
(None,)	-	C45H84O10	802.642	22.57			1.3	-	-	184	102	181	246
(None,)	-	C36H64O18	802.447	16.99			3.5	-	-	2360	3840	3240	3180
(None,)	-	C35H44O20	802.27	17.08			1.7	-	-	27	22.5	25.9	27.5
(None,)	-	C38H40O18	802.254	30.33			0.6	-	-	16.9	29.6	77.4	76.1
(None,)	-	C46H60N2O10	801.432	17.12			1.5	-	-	495	659	1020	1210
(None,)	-	C49H80O7	798.622	22.05			0.9	-	-	742	1630	4590	4350
(None,)	-	C38H36O18	798.22	23.58			2.4	-	-	56.6	79.6	63.3	74.3
(None,)	-	C41H62O14	796.452	17.06			2.8	-	-	2880	4590	3490	3620
(None,)	-	C56H86O	792.692	26.02			7.1	-	-	1810	2120	2070	2120
(None,)	-	C39H64O16	789.434	16.89			8.8	-	-	1920	2730	2240	2310
(None,)	-	C43H60O12	786.441	16.95			0.9	-	-	2990	4820	3780	3860
(None,)	-	C39H61NO14	785.443	17.09			0.2	-	-	1340	2270	1880	1870
(None,)	-	C40H62O14	784.443	17.06			3.6	-	-	2210	3970	3120	3030
(None,)	-	C39H42O17	783.244	26.56			5.6	-	-	55.1	51	92.5	76.1
(None,)	-	C32H38O21	776.23	20.15			4.4	-	-	17000	25500	29100	16800
(None,)	-	C49H91NO4	775.725	24.58			0.5	-	-	408	602	601	595
(None,)	-	C36H37O18	775.231	24.61			0.4	-	-	170	290	585	559
(None,)	-	C36H36O18	774.221	21.93			0.1	-	-	106	309	372	300
(None,)	-	C36H61N5O13	772.429	16.84			3.9	-	-	3530	5740	4490	4640
(None,)	-	C34H42O19	772.264	23.55			1.8	-	-	158	220	258	235
(None,)	-	C47H83D5O6	771.721	25.74			0.8	-	-	16800	30000	38800	38200
(None,)	-	C39H63NO14	770.431	16.96			0.2	-	-	3220	5100	4090	4150
(None,)	-	C32H37O20	759.222	22.89			0	-	-	4820	8310	22000	20600
(None,)	-	C32H37O20	759.218	28.18			3.5	-	-	519	689	992	974
(None,)	-	C40H50N8O6	756.427	16.87			9.3	-	-	3860	6040	4630	4830
(None,)	-	C39H62O14	755.426	17.03			3.7	-	-	1980	3090	2470	2510
(None,)	-	C55H90	751.705	24.11			6.9	-	-	254	290	275	359
(None,)	-	C51H86O2	748.699	20.5			2.3	-	-	167	205	184	170
(None,)	-	C51H84O2	746.68	20.37			1	-	-	63.8	95.4	87.3	89
(None,)	-	C45H76O7	746.592	21.61			0.8	-	-	4580	7590	27600	30000
(None,)	-	C36H38O16	744.253	20.91			2.1	-	-	233	386	350	317
(None,)	-	C39H32O15	741.181	20.15			0.4	-	-	120	171	194	115
(None,)	-	C43H52N4O6	738.419	17.02			4.8	-	-	3640	5350	4190	4280
(None,)	-	C37H67NO12	735.501	17.63			4.5	-	-	89.1	44	73.5	52.6
(None,)	-	C43H73O6P	734.542	17.72			1	-	-	13100	16700	11700	12900
(None,)	-	C43H70O8	732.541	17.72			0.4	-	-	154000	191000	140000	150000
(None,)	-	C30H37N9O13	732.258	17.58			1.7	-	-	47	44.4	39.7	22.2
(None,)	-	C27H22O22S	731.041	20.12			5	-	-	93.4	71	287	171
(None,)	-	C45H76O7	729.56	20.38			0.7	-	-	296	791	1110	1110
(None,)	-	C44H89NO6	728.677	25.41			1	-	-	146	91.6	138	108
(None,)	-	C32H55N9O10	726.411	17.08			2	-	-	2930	4550	3680	3590
(None,)	-	C39H53N3O9	725.407	16.96			1.8	-	-	1710	2740	2030	2220
(None,)	-	C38H58O12	724.427	17.13			1.4	-	-	663	2240	3010	1720
(None,)	-	C32H34O18	724.204	27.47			2.7	-	-	77.4	104	138	123
(None,)	-	C37H43N3O12	722.294	17.2			6	-	-	19.3	17.4	14	11.1
(None,)	-	C36H32O15	722.208	27.49			0.5	-	-	376	483	652	604
(None,)	-	C43H72O7	718.556	21.34			2.2	-	-	2530	4520	2780	4590
(None,)	-	C38H67NO10	715.514	18.11			4.2	-	-	478	630	462	434
(None,)	-	C38H54N2O11	715.387	16.93			8.3	-	-	1400	2580	2110	2270
(None,)	-	C48H82O2	708.664	24.96			0.3	-	-	202	316	152	275
(None,)	-	C42H48N4O5	706.398	16.7			0.3	-	-	787	1860	1370	1080
(None,)	-	C42H70O7	704.554	20.61			2.3	-	-	13.5	48.5	176	2090
(None,)	-	C41H64O8	702.495	17.77			0	-	-	10700	12300	9180	10400
(None,)	-	C41H80O8	701.605	23.17			0.7	-	-	697	554	36.3	27.5
(None,)	-	C39H73NO9	700.531	18.91			0.1	-	-	399	611	387	381
(None,)	-	C43H71D5O5	695.634	23.04			0	-	-	4980	8660	12100	11000
(None,)	-	C33H58O15	695.401	17.67			6.9	-	-	1630	2600	2010	2190
(None,)	-	C33H57NO13	693.415	17.39			3.6	-	-	181	98.9	631	302
(None,)	-	C32H52O16	693.331	15.29			0.7	-	-	56.4	119	24.4	43.2
(None,)	-	C32H36O17	693.204	22.72			0.3	-	-	318	583	762	570
(None,)	-	C47H78O3	691.606	19.66			0.6	-	-	76.6	108	93.7	75.3
(None,)	-	C41H68O7	690.525	21			4.2	-	-	644	1100	1060	993
(None,)	-	C48H80O2	689.624	24.44			0.1	-	-	120	203	159	184
(None,)	-	C37H70NO7P	689.518	17.77			2.8	-	-	61400	79200	50000	61800
(None,)	-	C32H30O16	688.184	21.83			0.4	-	-	571	770	2160	2120
(None,)	-	C43H63D5O5	687.568	21.99			4.1	-	-	2560	6360	8400	7970
(None,)	-	C29H33O16P	686.19	21.63			7.6	-	-	601	1100	468	11600
(None,)	-	C35H57NO11	685.432	22.4			7.2	-	-	4030	5630	3540	3260
(None,)	-	C30H36O18	685.198	26.87			0.9	-	-	329	390	519	510
(None,)	-	C35H54O12	684.392	16.93			0.5	-	-	3320	5100	4040	4170
(None,)	-	C39H47N5O5	683.39	16.84			0.6	-	-	2530	3840	3040	3110
(None,)	-	C30H48N8O9	682.389	16.85			0.1	-	-	4590	7120	5400	5690
(None,)	-	C18H34O22P2	682.142	17.02			6.3	-	-	15.8	23.1	19.5	28.9
(None,)	-	C37H51N5O6	679.416	18.97			1.4	-	-	563	583	647	724
(None,)	-	C46H76O2	678.613	22.96			3.1	-	-	468	818	944	838
(None,)	-	C38H60O9	678.46	17.82			0.9	-	-	7370	8370	1530	5850
(None,)	-	C36H52O12	677.349	15.38			8.2	-	-	597	481	161	470
(None,)	-	C41H75D5O5	675.664	24.27			0.5	-	-	3390	4500	5970	6010
(None,)	-	C25H47N5O15	675.336	15.53			3.3	-	-	110	188	160	191
(None,)	-	C35H56N6O6	674.465	18.85			6.6	-	-	8110	10600	7530	7970
(None,)	-	C25H48N6O14	674.361	16.22			5.1	-	-	2020	3570	2760	3060
(None,)	-	C32H32O13S	674.184	20.44			7.1	-	-	12.7	30.1	12.2	12.6
(None,)	-	C41H68O7	673.508	18.49			2.3	-	-	297	470	2770	206
(None,)	-	C30H49N6O10	671.388	17.02			0.7	-	-	1930	2940	2320	2270
(None,)	-	C44H76O3	670.612	24.19			1	-	-	506	448	669	845
(None,)	-	C25H44N14O7	670.387	16.98			1.9	-	-	3580	5280	4190	4380
(None,)	-	C38H28N4O7	670.23	20.53			1.4	-	-	175	341	306	314
(None,)	-	C36H42O12	667.27	16.53			2.4	-	-	26	39.9	10.9	30.9
(None,)	-	C22H28N9NaO9S2	667.161	19.82			5.6	-	-	175	284	245	198
(None,)	-	C38H62O9	663.45	23.22			7.4	-	-	112000	186000	133000	127000
(None,)	-	C30H51N3O10S	663.358	16.92			4.8	-	-	1150	1430	821	1190
(None,)	-	C32H52O13	662.377	16.98			1.8	-	-	2280	3380	2760	2780
(None,)	-	C30H28O14S	662.162	20.1			3.1	-	-	23.2	19.6	22.6	26.6
(None,)	-	C32H53NO12	661.396	17.17			4.3	-	-	175	260	203	160
(None,)	-	C6H18O24P6	660.872	17.2			2.8	-	-	363	496	434	439
(None,)	-	C29H36O17	657.196	22.44			7.4	-	-	295	315	363	359
(None,)	-	C37H66O8	656.509	19.02			0.2	-	-	612	575	234	311
(None,)	-	C37H50O9	656.372	16.84			4.1	-	-	3220	5240	4210	4310
(None,)	-	C35H45NO11	656.293	19.13			1.9	-	-	18.3	9.61	14.3	16
(None,)	-	C29H34O17	655.181	16.91			2	-	-	19.9	21.7	48.7	26.3
(None,)	-	C36H48N2O8	654.375	16.91			4.4	-	-	3420	5560	4680	4530
(None,)	-	C45H62O2	652.513	19.3			1.7	-	-	123	155	191	55.1
(None,)	-	C31H54O14	651.364	16.84			5.3	-	-	1190	2360	1370	1340
(None,)	-	C36H56O10	649.391	17.38			3.7	-	-	108	1040	646	96.2
(None,)	-	C32H54O12	648.393	17.18			0.9	-	-	1590	136	1020	193
(None,)	-	C25H34N3Na2O9PS	647.189	26.28			2.6	-	-	90.5	128	198	127
(None,)	-	C35H64O9	646.489	17.81			3.7	-	-	13800	18900	10800	14700
(None,)	-	C38H44O8	646.341	14.41			4.1	-	-	237	283	339	147
(None,)	-	C45H72O2	645.562	28.48			1.5	-	-	259	206	152	33.8
(None,)	-	C34H65N3O5S	645.492	17.81			4.2	-	-	62900	86000	49500	67200
(None,)	-	C30H47N3O9S	643.331	14.11			0.3	-	-	46.2	94.3	21.1	41.9
(None,)	-	C30H26O16	643.121	17.37			1.3	-	-	13	46.1	27	27.6
(None,)	-	C37H44N4O5	642.364	16.67			0.4	-	-	3250	5120	4510	4450
(None,)	-	C45H66O	640.541	20.07			4	-	-	685	691	308	177
(None,)	-	C29H50O14	640.357	16.88			4.7	-	-	4680	7700	5560	6160
(None,)	-	C28H31O17	640.157	22.37			0.4	-	-	41.1	25.7	17.5	23.4
(None,)	-	C39H63D5O5	639.572	22.74			0.7	-	-	979	1490	3130	2990
(None,)	-	C35H59NO8	639.449	19.54			0.8	-	-	867	127	89.6	858
(None,)	-	C26H27N3O13S	639.154	19.45			7.4	-	-	37.9	24.1	65.7	36.8
(None,)	-	C35H46N4O4S	636.36	16.52			4.1	-	-	2300	2570	2900	1890
(None,)	-	C44H74O2	635.58	24.4			4.9	-	-	237	304	398	314
(None,)	-	C45H62O2	635.484	19.39			8.7	-	-	420	420	160	235
(None,)	-	C35H42N4O6	632.355	16.38			0.5	-	-	274	602	532	364
(None,)	-	C32H54O12	631.365	16.84			1.3	-	-	1520	2690	2340	2420
(None,)	-	C40H75N3O2	630.593	23.15			2.7	-	-	126	135	176	190
(None,)	-	C39H71D5O5	630.609	27.14			0.4	-	-	252	270	280	275
(None,)	-	C32H51NO11	626.358	16.71			7.4	-	-	3590	5620	4370	4670
(None,)	-	C29H34O14	624.232	22.65			1.7	-	-	109	133	178	139
(None,)	-	C32H46N8O5	623.368	23.89			0.4	-	-	158	251	276	263
(None,)	-	C30H53NO11	621.388	17.63			1.9	-	-	1210	1420	847	980
(None,)	-	C31H55O9P	620.395	17.45			5.2	-	-	172	328	288	358
(None,)	-	C37H47NO6	619.36	16.83			2.7	-	-	227	882	1530	875
(None,)	-	C27H48N6O9	618.38	17.51			3.3	-	-	1940	2380	345	390
(None,)	-	C30H24N4O10	618.184	17.21			1.2	-	-	20.8	19.2	21.5	29.4
(None,)	-	C37H60O7	617.437	19.64			5.8	-	-	146	200	143	215
(None,)	-	C35H54N2O6	616.43	19.62			1.9	-	-	412	93.3	115	71.8
(None,)	-	C36H42N4O4	612.356	17.03			1.7	-	-	4190	6290	4910	5220
(None,)	-	C27H31O16	612.163	19.52			7.5	-	-	906	1300	1030	872
(None,)	-	C25H30N4O9S2	612.179	22.11			0.6	-	-	907	1250	2950	2810
(None,)	-	C22H27N9O7S2	611.181	22.06			0.1	-	-	1210	1660	3940	3780
(None,)	-	C32H48O10	610.355	16.9			2.8	-	-	3480	5230	4070	4220
(None,)	-	C21H29N5O9S3	609.147	17.12			2	-	-	30	30.1	19	27.7
(None,)	-	C33H42N4O6	608.343	14.95			1.4	-	-	877	1160	378	477
(None,)	-	C32H58N6O5	607.454	19.27			2.8	-	-	213	240	370	317
(None,)	-	C26H43N11O6	606.344	16.96			2.1	-	-	3200	4790	3720	3850
(None,)	-	C37H62O6	603.446	18.47			2.3	-	-	1510	2950	1320	680
(None,)	-	C37H67D5O5	602.576	26.22			3.2	-	-	414	439	441	431
(None,)	-	C34H38N4O5	600.321	16.15			4.3	-	-	2920	5220	4570	4410
(None,)	-	C35H40N4O4	598.339	16.68			0.4	-	-	3210	5290	4450	4590
(None,)	-	C30H27O12	597.176	17.03			2.9	-	-	24.5	45.1	36.5	25.7
(None,)	-	C37H54O6	595.398	17.38			0.6	-	-	81.9	201	148	114
(None,)	-	C27H28O15	593.153	0.17			3.5	-	-	85.3	86.4	56.6	59.7
(None,)	-	C33H52N2O6	590.411	17.93			3.8	-	-	5940	7020	3830	5190
(None,)	-	C24H35N3O12S	590.198	16.97			1.9	-	-	14.7	37.9	19.2	25.9
(None,)	-	C33H40N4O6	589.305	16.76			4.7	-	-	430	481	593	593
(None,)	-	C35H59D5O5	587.535	22.49			6.6	-	-	1470	1320	1470	1510
(None,)	-	C30H34O12	587.209	17.03			2.1	-	-	10.6	28.5	15.9	15.7
(None,)	-	C21H41N7O11	585.325	16.42			7.8	-	-	1570	2700	2300	2300
(None,)	-	C34H38N4O4	584.323	16.21			0.4	-	-	3490	6380	5170	5130
(None,)	-	C28H31NaO9S	584.197	19.16			2.2	-	-	27.4	34.8	30.5	26.8
(None,)	-	C29H26O12	584.174	21.77			1.7	-	-	31.7	58.8	53.2	60
(None,)	-	C15H24N2O17P2	584.085	17.3			1.1	-	-	10.5	15.5	8.92	11.6
(None,)	-	C30H44O10	582.329	16.72			2.6	-	-	3250	5270	4170	4590
(None,)	-	C30H28O11	582.2	19.09			1.7	-	-	65.7	71.7	58	48.1
(None,)	-	C29H24O12	582.165	16.98			4.6	-	-	15.4	38.9	20.2	22.9
(None,)	-	C25H31N3O11S	582.175	21.77			0.5	-	-	62.1	114	91.8	116
(None,)	-	C18H17N6NaO8S3	582.055	27.42			2.5	-	-	16.9	16	15.9	24.5
(None,)	-	C6H17O21P5	580.9	2.4			1.1	-	-	67.1	59.5	38.1	29.6
(None,)	-	C31H39N5O5	579.328	17.06			4	-	-	1040	2170	1720	1440
(None,)	-	C37H52O4	578.422	19.52			1.2	-	-	654	723	708	778
(None,)	-	C31H45NO8	577.347	17.72			0.3	-	-	976	1060	1110	513
(None,)	-	C35H63D5O5	574.548	25.35			3.4	-	-	447	460	498	490
(None,)	-	C33H52N2O6	573.393	17.42			4.4	-	-	4190	9490	2980	7210
(None,)	-	C28H28O13	573.156	2.16			6.2	-	-	18.6	32.2	22	19.2
(None,)	-	C32H42O8	572.324	16.49			2.6	-	-	4160	6410	5360	5160
(None,)	-	C17H31O18P	572.16	19.37			3	-	-	11.4	13	18.3	7.15
(None,)	-	C25H33N3O10S	568.198	19.76			4.6	-	-	15.5	11.7	671	144
(None,)	-	C30H28O10	566.204	21.38			1	-	-	93.3	101	128	97.2
(None,)	-	C27H42N6O6	564.347	9.84			2.6	-	-	1400	561	804	4360
(None,)	-	C26H26O13	564.169	17.04			1.2	-	-	20.5	18.2	12.7	18.7
(None,)	-	C30H43NO8	563.326	16.96			0	-	-	770	1470	1310	1720
(None,)	-	C21H21O15S	563.093	18.64			1.7	-	-	7.48	11.3	7.76	9.03
(None,)	-	C37H52N2O	558.435	17.91			6.2	-	-	11600	15200	10500	12000
(None,)	-	C32H42O7	556.325	16.47			2.9	-	-	3180	5330	4320	4300
(None,)	-	C40H74	555.585	27.12			0.1	-	-	1040	1090	1090	1060
(None,)	-	C33H63NO4	555.507	25.68			2.7	-	-	736	601	546	578
(None,)	-	C35H52O4	554.423	18.38			7.5	-	-	3880	5520	4190	3570
(None,)	-	C8H6O12Sb2	553.827	17.13			2.5	-	-	24.9	92.6	177	103
(None,)	-	C40H72	553.57	26.42			0.9	-	-	2540	2680	2590	2610
(None,)	-	C40H54	552.453	19.71			1.1	-	-	69.1	59.8	131	48.8
(None,)	-	C40H70	551.554	25.68			1.1	-	-	3790	3570	3350	3530
(None,)	-	C30H28O9	550.209	22.16			2.2	-	-	74.6	71.3	137	95.3
(None,)	-	C23H17NO14	549.085	17			1.8	-	-	7.97	29	8.1	13.6
(None,)	-	C30H42O8	548.316	16.91			5.9	-	-	2490	3800	3090	3110
(None,)	-	C24H27N5O9	547.211	16.05			6	-	-	537	558	599	591
(None,)	-	C33H59D5O5	546.515	24.52			0.5	-	-	412	409	445	447
(None,)	-	C32H48O6	546.377	18.11			0.6	-	-	652	839	193	633
(None,)	-	C26H24O12	546.169	21.48			2	-	-	20.3	55.4	50.7	32.5
(None,)	-	C26H41NO10	545.324	17.6			2.4	-	-	673	989	880	899
(None,)	-	C21H20O15S	545.062	17.02			2.5	-	-	15.3	15.4	13	12.5
(None,)	-	C29H34O10	543.223	15.51			0.9	-	-	96.2	108	90.4	87.4
(None,)	-	C24H44O12	542.313	16.63			6.5	-	-	1860	2790	2360	2410
(None,)	-	C35H54O3	540.437	18.71			2.1	-	-	14100	20200	14700	13200
(None,)	-	C28H42O9	540.321	16.83			6.4	-	-	2760	4690	3790	3700
(None,)	-	C36H62N2O	539.497	21.58			3.6	-	-	231	288	167	137
(None,)	-	C31H42N2O6	539.314	17.03			7.4	-	-	2160	3050	2460	2490
(None,)	-	C31H52O6	538.413	19.13			1	-	-	146	168	282	323
(None,)	-	C24H23O13	537.147	19.05			0.1	-	-	2130	2780	2290	1770
(None,)	-	C33H42O5	536.334	17.25			4.3	-	-	356	490	642	311
(None,)	-	C36H54O3	535.411	19.16			4.3	-	-	181	201	175	108
(None,)	-	C31H30O7	532.232	15.93			1.6	-	-	138	106	143	99.4
(None,)	-	C15H14N8O5S4	532.031	17.16			2.4	-	-	36	60.2	11.9	5.81
(None,)	-	C20H35NO14	531.248	15.81			1	-	-	1010	165	306	757
(None,)	-	C20H29N6O8P	530.198	17.51			3.7	-	-	20.1	36.2	27.4	36.3
(None,)	-	C29H38N2O6	528.303	16.52			4.2	-	-	1570	2130	2230	2100
(None,)	-	C27H30N2O6S	528.212	18.47			2.8	-	-	12.7	11.2	7.62	8.34
(None,)	-	C31H59NO4	527.475	21.77			3.7	-	-	240	255	274	262
(None,)	-	C28H35N3O6	527.284	16.12			3.3	-	-	1660	2780	2420	2430
(None,)	-	C30H36O7	526.283	16.11			5.2	-	-	5040	9120	8000	7990
(None,)	-	C26H55NO7P	525.384	18.76			6.3	-	-	763	573	584	526
(None,)	-	C24H42O11	524.304	16.56			1.5	-	-	3020	4950	4330	4410
(None,)	-	C27H20O11	521.107	18.83			2.9	-	-	92	106	75.4	102
(None,)	-	C25H26O10S	519.134	0.16			3.6	-	-	169	172	109	112
(None,)	-	C20H19N6O9P	519.113	19.03			5.9	-	-	9.38	4.89	13.4	16
(None,)	-	C25H41NO9	517.304	16.95			2.5	-	-	473	368	1940	1640
(None,)	-	C33H56N2O	514.473	21.83			0.5	-	-	1260	1350	1060	1080
(None,)	-	C26H24O10	514.153	17.98			0.3	-	-	31.1	196	41.4	92.8
(None,)	-	C22H48N12O2	513.414	18.02			5.6	-	-	49000	63900	39100	46600
(None,)	-	C33H53NO3	512.412	18.01			1.2	-	-	189000	249000	152000	182000
(None,)	-	C29H31N7O	511.288	16.26			6.6	-	-	2150	3480	2560	3050
(None,)	-	C30H30N4O4	511.24	23.89			4.2	-	-	150	209	236	219
(None,)	-	C34H68O	510.558	23.6			0.2	-	-	51.5	131	176	174
(None,)	-	C33H48O3	510.396	18.53			1	-	-	4270	5930	4720	4310
(None,)	-	C30H36O6	510.286	16.12			0.2	-	-	5590	9530	7050	7420
(None,)	-	C28H31NO8	510.213	17.51			4	-	-	7.01	2.09	8.42	7.59
(None,)	-	C37H48O	509.382	18.06			1	-	-	1190	1380	1310	1400
(None,)	-	C9H15N6O13P3	509.001	25.53			2.7	-	-	18.2	22	14.8	23.1
(None,)	-	C26H42N4O5	508.357	17.89			3	-	-	77.5	96.5	2520	8100
(None,)	-	C25H27N2NaO5S	508.186	17.54			1.1	-	-	25	66.8	41.5	65.8
(None,)	-	C25H47NO8	507.363	17.51			2.1	-	-	21500	33000	22900	24800
(None,)	-	C20H36N6O8	506.296	16.66			1	-	-	2660	3880	2980	3100
(None,)	-	C26H40N4O6	505.301	17.06			2.1	-	-	547	843	790	700
(None,)	-	C30H16O8	505.079	17.75			3	-	-	44.6	8.1	28.6	115
(None,)	-	C18H38N12O4	504.352	18.85			0.1	-	-	212	210	157	140
(None,)	-	C22H27N7O6	503.236	16.02			2.4	-	-	48.1	697	65.9	850
(None,)	-	C26H28O9	502.201	16.82			1.5	-	-	18.2	25.7	17.1	24.2
(None,)	-	C30H34N4O2	500.303	16.81			1.9	-	-	619	861	1160	635
(None,)	-	C32H38N2O3	499.298	16.56			4.2	-	-	513	365	786	271
(None,)	-	C28H34O8	499.238	14.87			1.3	-	-	190	26.4	58.8	54.2
(None,)	-	C10H18N3O13P3	499.044	18.76			4.3	-	-	15.5	6.32	17.4	4.61
(None,)	-	C22H40O11	498.286	16.44			7.8	-	-	5410	8140	6880	6690
(None,)	-	C18H32N4O7S2	498.196	18.71			1.3	-	-	19.2	17.7	20.2	17.9
(None,)	-	C33H56N2O	497.448	21.82			1.1	-	-	1450	1640	1280	1290
(None,)	-	C20H25N5O7S	497.169	18.48			4.4	-	-	30.2	56.8	92	53.9
(None,)	-	C29H35NO5	495.282	22.38			1.3	-	-	3.63	5.73	8.67	6.7
(None,)	-	C26H52O7	494.401	19.3			4.6	-	-	826	1020	847	814
(None,)	-	C30H36O5	494.303	17.05			3.6	-	-	1470	3830	3140	2420
(None,)	-	C18H32CaN2O10	494.198	19.24			0.8	-	-	10	14.4	6.84	8.09
(None,)	-	C23H24O11	494.174	17.75			1.3	-	-	10.6	20.8	9.83	19.4
(None,)	-	C27H40O8	493.28	16.74			0.6	-	-	1290	1870	1880	1660
(None,)	-	C17H18N5NaO6S2	493.081	17.28			2.7	-	-	15.7	34.7	44.6	18.5
(None,)	-	C25H22N4O6	492.189	20.92			0	-	-	83.3	98.9	87.7	91.8
(None,)	-	C26H35N3O5	487.287	16.88			2.9	-	-	453	642	488	466
(None,)	-	C24H19N2NaO4S2	487.085	17.41			4.4	-	-	17	50.1	11.2	17
(None,)	-	C32H40N2O	486.346	17.5			1.4	-	-	4150	5920	4360	4730
(None,)	-	C28H41N3O3	485.351	17.54			3.1	-	-	28200	42600	30600	34300
(None,)	-	C21H22O12	484.16	17.31			2.2	-	-	33.7	21.4	19.7	11
(None,)	-	C29H43N3O2	483.371	18.74			0.6	-	-	3850	3830	2630	2820
(None,)	-	C26H42O8	483.294	16.71			1.2	-	-	1570	2510	2150	2230
(None,)	-	C29H36O5	482.288	16.23			2.2	-	-	3620	6060	4670	4630
(None,)	-	C14H27N2O13P	480.16	19.43			1.8	-	-	439	91.2	647	566
(None,)	-	C24H47NO7	479.374	19.17			0.5	-	-	362	477	342	411
(None,)	-	C20H30O13	479.176	19.95			0.2	-	-	415	380	418	403
(None,)	-	C25H22N4O5	476.195	21.69			3.8	-	-	75.9	60.1	60.9	58.2
(None,)	-	C29H31NO4	475.259	16.61			0.2	-	-	1170	1910	1600	1640
(None,)	-	C23H27N3O7	475.221	14.38			4.3	-	-	87.5	164	103	105
(None,)	-	C19H25N3O8S	473.178	16.06			4.7	-	-	690	726	10.2	680
(None,)	-	C30H50N2O	472.43	21.54			6.2	-	-	595	720	554	578
(None,)	-	C28H27N3O3	471.236	15.51			0.2	-	-	167	281	176	191
(None,)	-	C26H37N5O2	469.323	20.92			1.5	-	-	442	330	277	276
(None,)	-	C22H29NO9	469.217	15.53			3.2	-	-	32.2	19.2	3.21	8.3
(None,)	-	C18H28O14	469.162	18.04			2.2	-	-	75.9	39.4	40.4	82.6
(None,)	-	C23H51N2O5P	467.365	17.57			6.6	-	-	8170	10800	9960	10800
(None,)	-	C19H39N5O7	467.316	19.09			3.4	-	-	789	822	622	703
(None,)	-	C18H36N6O5S	466.283	16.85			1.1	-	-	2610	4140	3190	3290
(None,)	-	C29H33NO3	461.28	16.93			1.5	-	-	746	883	1490	916
(None,)	-	C23H29N3O6	461.242	14.13			2	-	-	114	356	294	170
(None,)	-	C21H16O12	461.075	16.99			0.4	-	-	16.6	22.1	18.2	7.6
(None,)	-	C19H18CaN2O9	459.061	17.38			1.3	-	-	9.64	21.1	7.68	12.2
(None,)	-	C28H44N2O2	458.378	19.64			1.1	-	-	1180	1120	1500	1140
(None,)	-	C22H28N6O3S	457.206	16.11			4.2	-	-	877	936	964	763
(None,)	-	C21H32N3O5P	455.238	15.49			0.2	-	-	233	393	193	278
(None,)	-	C22H32N2O7	454.256	16.18			2.4	-	-	1460	2290	1980	1880
(None,)	-	C20H29N5O6	453.248	16.12			3.3	-	-	2800	4600	3910	3910
(None,)	-	C24H34O5S	452.246	16.11			1.2	-	-	11400	19100	16500	16700
(None,)	-	C26H31N3O3	451.266	16.53			3.6	-	-	945	1520	1380	1420
(None,)	-	C22H31N3O4S	451.236	15.33			3.3	-	-	453	707	7.68	94.2
(None,)	-	C14H27NO9S3	450.091	19.23			3.1	-	-	11.9	12.9	13.3	12.3
(None,)	-	C21H20O11	449.106	17.73			4.3	-	-	19.4	29.1	15.9	43.9
(None,)	-	C28H33D8NO3	448.353	21.13			6.2	-	-	2.33	3460	2670	2750
(None,)	-	C23H30N2O6	448.248	15.8			8	-	-	532	1970	2920	2450
(None,)	-	C20H42N6O5	447.331	18.71			7.7	-	-	315	712	290	221
(None,)	-	C22H20O10	445.115	19.49			2.3	-	-	663	881	802	751
(None,)	-	C17H14O11S	444.058	17.27			0.3	-	-	5.89	7.95	8.87	8.85
(None,)	-	C29H31NO2	443.27	17.19			1.6	-	-	138	269	793	102
(None,)	-	C29H44O2	442.382	20.55			5	-	-	1340	1140	1300	1250
(None,)	-	C24H28N2O5	442.222	16.31			0.4	-	-	544	32.7	154	57
(None,)	-	C17H29NO11	441.212	15.93			3.9	-	-	633	489	469	334
(None,)	-	C18H28O11	438.204	17.3			3.4	-	-	20.7	31.5	22.6	32.7
(None,)	-	C30H42O	436.361	19.69			3.3	-	-	722	769	385	338
(None,)	-	C23H26N6O2	436.25	15.46			7.6	-	-	717	8730	2500	7750
(None,)	-	C20H27N5O5	435.24	16.58			7.5	-	-	1110	1670	1520	1350
(None,)	-	C23H32N2O3S	434.251	16.55			4.7	-	-	2150	3310	2800	2280
(None,)	-	C18H14N4O7S	431.071	19.39			2.8	-	-	37.9	49.3	93.3	107
(None,)	-	C21H32O8	430.244	14.31			1.1	-	-	353	902	444	185
(None,)	-	C29H35NO2	430.271	16.06			6.6	-	-	1040	1850	1490	1570
(None,)	-	C26H37NO3	429.311	18.1			1.6	-	-	1260	2230	1230	990
(None,)	-	C24H29NO5	429.234	15.88			5.9	-	-	974	1000	1690	1660
(None,)	-	C20H28O10	429.165	19.89			0.3	-	-	5.23	11.2	6.74	10.3
(None,)	-	C24H43N3O3	422.337	18.73			0.2	-	-	2670	3500	2700	2200
(None,)	-	C22H32N2O5	422.265	16.31			1.5	-	-	1420	2440	1860	1820
(None,)	-	C18H37N5O5	421.318	18.4			3.2	-	-	748	998	762	1100
(None,)	-	C17H37N7O4	421.326	20.44			2.1	-	-	1630	1850	1700	1750
(None,)	-	C26H29NO3	421.246	14.16			4	-	-	184	632	367	866
(None,)	-	C24H41N3O3	420.32	20.46			2.6	-	-	3690	5370	4940	5040
(None,)	-	C20H18O2Sn	420.06	20.48			1.6	-	-	16.7	13.8	11.6	6.28
(None,)	-	C25H25N3O2	417.228	16.87			4.1	-	-	496	521	470	618
(None,)	-	C26H42N2O	416.363	20.32			0.3	-	-	1270	1420	1450	1450
(None,)	-	C18H28N3O5P	415.209	16.83			1.7	-	-	18900	24000	19800	20500
(None,)	-	C24H32N2O3	414.278	16.78			4.1	-	-	4330	5440	3760	3940
(None,)	-	C18H21O8P	414.137	16.63			3.2	-	-	75.2	49.2	80.5	74
(None,)	-	C24H29NO4	413.246	16.07			5.7	-	-	1120	2070	1640	1740
(None,)	-	C27H38O2	412.303	18.27			0.9	-	-	469	1360	74.4	369
(None,)	-	C28H40O	410.34	19.02			3.2	-	-	514	303	316	156
(None,)	-	C25H30NO3	410.259	16.48			7.1	-	-	727	1060	827	823
(None,)	-	C25H45NO2	409.376	21.42			3.8	-	-	2690	2900	2400	2460
(None,)	-	C21H33N3O5	408.248	15.68			5.9	-	-	2440	977	3480	3440
(None,)	-	C30H46	407.366	21.82			2.2	-	-	108	105	145	100
(None,)	-	C25H40O3	406.331	19.35			0.8	-	-	840	566	829	811
(None,)	-	C23H16O6	406.127	18.16			0.5	-	-	50.7	45.5	42.1	49.5
(None,)	-	C26H45NO	405.384	21.29			1.3	-	-	381	428	929	1000
(None,)	-	C22H28N2O4	402.241	16.79			5	-	-	1370	2030	1460	1560
(None,)	-	C21H18O7	400.137	16.34			3.6	-	-	146	100	114	109
(None,)	-	C20H31NO6	399.254	17.88			0.3	-	-	1860	617	1160	218
(None,)	-	C16H19N3O6S	399.134	16.23			0	-	-	536	473	474	431
(None,)	-	C21H16O7	398.109	17.66			4.1	-	-	60.4	24.8	19.3	103
(None,)	-	C20H30N2O5	396.249	16.84			0.1	-	-	1110	1500	1090	1080
(None,)	-	C25H28O3	394.238	16.39			0.8	-	-	1240	1840	1460	1530
(None,)	-	C19H34O8	391.234	16.73			1.7	-	-	542	943	697	736
(None,)	-	C16H20O11	389.105	18.7			1.9	-	-	403	346	452	517
(None,)	-	C23H30O4	388.254	9.73			1.2	-	-	1590	4170	424	996
(None,)	-	C23H35N3O	387.319	19.58			1.6	-	-	374	1130	991	922
(None,)	-	C11H24N5O7P	387.177	16.03			3.5	-	-	1270	2330	2320	2480
(None,)	-	C19H15NO7	387.118	19.47			0.1	-	-	7.38	17.4	6.53	18.7
(None,)	-	C12H19N3O8S	383.121	18.65			3.2	-	-	17.9	8.92	11.5	12.2
(None,)	-	C16H19N3O5S	383.137	22.43			1.7	-	-	82.4	128	99	88.9
(None,)	-	C24H28O3	382.236	15.57			3.8	-	-	1300	751	658	641
(None,)	-	C23H25NO3	381.22	16.53			5.7	-	-	626	961	748	814
(None,)	-	C24H27NO3	378.209	16.31			7.1	-	-	22100	32000	26400	26100
(None,)	-	C15H30N6O4	376.267	17.6			2	-	-	109	135	96.3	46.3
(None,)	-	C24H29NO2	364.226	16.14			1.5	-	-	1350	1950	1380	1340
(None,)	-	C18H21N3O4	361.184	16.47			5.2	-	-	1260	1780	1490	1470
(None,)	-	C20H42O2Si	360.327	20.2			1.8	-	-	370	0.342	3640	3700
(None,)	-	C20H26N2O3	360.23	16.64			1.4	-	-	1000	1500	1070	1210
(None,)	-	C19H23N3O3	359.208	16.95			0.1	-	-	454	990	834	684
(None,)	-	C19H22N2O3S	359.145	10.25			0.6	-	-	7.49	374	171	201
(None,)	-	C11H15NO7S2	355.066	19.2			7	-	-	741	981	913	801
(None,)	-	C22H33D4NO2	352.317	18.73			3.7	-	-	6570	6880	3170	2850
(None,)	-	C18H26N2O4	352.225	16.9			2.8	-	-	472	731	472	444
(None,)	-	C22H27D5O2	351.303	19.44			0.3	-	-	316	335	314	395
(None,)	-	C24H29NO	348.231	17.15			1.6	-	-	815	1280	982	967
(None,)	-	C17H28O4S	346.206	16.43			1.9	-	-	633	829	677	592
(None,)	-	C18H21N3O3	345.188	16.54			6	-	-	2280	3240	2690	2650
(None,)	-	C18H28O3S	342.212	16.92			3.1	-	-	42.1	178	127	145
(None,)	-	C9H12N2O7P2	340.054	20.34			4.5	-	-	47.8	20.2	25.9	11.8
(None,)	-	C13H23NO8	339.175	15.96			2.5	-	-	364	779	572	578
(None,)	-	C18H24O3S	338.171	16.61			1.5	-	-	25.9	57.6	20.4	38.8
(None,)	-	C17H18O6	336.141	16.08			3.2	-	-	292	317	293	287
(None,)	-	C18H38O2Si	332.296	19.35			4.9	-	-	193	523	1880	1690
(None,)	-	C10H23BN2O6S	327.175	17.54			1.8	-	-	83.6	133	59.5	77.1
(None,)	-	C16H24N2O4	326.21	16.85			2.6	-	-	46.9	85.1	942	584
(None,)	-	C22H42	324.36	21.06			7.4	-	-	161	369	80.4	101
(None,)	-	C16H23N3O3	323.205	17.47			2.8	-	-	419	594	361	472
(None,)	-	C18H24O4	322.203	17.26			2.5	-	-	982	823	530	735
(None,)	-	C11H22N6O4	320.205	16.69			0.9	-	-	600	817	671	752
(None,)	-	C24H12	318.129	16.85			2	-	-	104	138	116	104
(None,)	-	C17H33NO3	317.28	19.24			4.7	-	-	269	352	434	455
(None,)	-	C11H14N4O6	316.122	17.28			0.1	-	-	68.3	84.3	14.4	8.39
(None,)	-	C16H10O6	316.081	19.47			0.6	-	-	27.4	2.72	65.2	43
(None,)	-	C19H21NO2	313.189	17.8			1.8	-	-	80.6	195	52.6	9.59
(None,)	-	C15H23N3OS	311.189	17.1			1.1	-	-	261	1310	259	407
(None,)	-	C20H24N2	310.223	17.62			1.1	-	-	1020	717	35.1	42.4
(None,)	-	C19H21N3	309.205	17.38			3.7	-	-	1320	1920	8190	9140
(None,)	-	C21H25NO	308.202	16.32			0.3	-	-	278	421	387	410
(None,)	-	C21H23NO	306.185	17.24			1.2	-	-	505	648	552	576
(None,)	-	C17H21NO3	305.186	17.58			0	-	-	271	223	261	210
(None,)	-	C7H10N3NaO6S	305.036	17.64			1.3	-	-	3.97	13.8	54.8	59.6
(None,)	-	C13H22NO3PS	304.115	16.08			3.6	-	-	161	185	143	151
(None,)	-	C17H21N3O	301.199	18.31			4.9	-	-	70.6	299	18.1	20.8
(None,)	-	C10H16O10	297.079	19.34			7	-	-	512	270	258	277
(None,)	-	C13H17N3O5	296.123	16.86			0.6	-	-	28.4	32.6	31.8	24.7
(None,)	-	C16H23NO3	295.201	17.46			2.2	-	-	2460	1710	2660	2800
(None,)	-	C10H21N5O4	293.2	20.38			6.8	-	-	56.8	1.99	73.8	85.3
(None,)	-	C19H32N2	289.267	19.25			2.2	-	-	971	1190	816	690
(None,)	-	C10H20N6O4	289.162	16.54			2.9	-	-	683	920	758	770
(None,)	-	C18H28D4O2	285.274	21.21			4.1	-	-	1020	1230	1210	1340
(None,)	-	C15H23NOS	283.183	17.78			4.4	-	-	665	1080	832	1080
(None,)	-	C12H21NO5	277.177	17.46			1.3	-	-	8770	9200	11900	12400
(None,)	-	C15H30NO2	274.261	19.78			3.7	-	-	69	56.9	155	114
(None,)	-	C15H30NO2	274.262	24.31			1.8	-	-	74.3	92.4	85.9	79.9
(None,)	-	C18H15N3	274.137	15.77			7.6	-	-	30.9	48.2	28.7	35.7
(None,)	-	C18H23N	271.214	19.09			4.2	-	-	94.9	151	76.6	101
(None,)	-	C16H15NO2	271.149	16.02			3.7	-	-	324	626	509	453
(None,)	-	C9H17NO7	269.135	16.5			2.7	-	-	381	453	351	408
(None,)	-	C15H24N2O	266.23	19.32			5.3	-	-	2.77	3.45	0.25	2.81
(None,)	-	C10H20N2O3S	266.159	16.74			1.3	-	-	8.72	9.36	6.62	7.84
(None,)	-	C10H21N3O4	265.182	17.14			2.2	-	-	3.15	344	502	491
(None,)	-	C9H16N4O4	262.154	20.06			2.6	-	-	171	215	20.4	92.5
(None,)	-	C9H17N5OS	261.149	20.04			0.2	-	-	896	1110	1010	1090
(None,)	-	C18H26O	259.206	19.95			2.4	-	-	66.7	49.9	35.1	84.5
(None,)	-	C9H20N2OS2	254.138	17.46			3.4	-	-	4.63	5.68	209	223
(None,)	-	C14H21NOS	252.142	2.9			0.6	-	-	14.5	22.1	16.8	15.3
(None,)	-	C12H10O4S	251.033	18.82			4	-	-	5.32	1.49	1.07	1.48
(None,)	-	C18H32	249.256	19.6			3.9	-	-	89.6	114	106	112
(None,)	-	C13H28NO2	248.244	18.83			3.5	-	-	40.1	51.8	46.6	51.3
(None,)	-	C11H23N3O2	247.215	18.8			3	-	-	18.5	11.2	59.6	25.1
(None,)	-	C13H22O3	244.189	19.48			3.6	-	-	1790	2070	1450	1260
(None,)	-	C12H18O2S	244.137	18.39			2.8	-	-	76.2	48.9	59.7	53.8
(None,)	-	C12H17NO3	241.149	19.55			2.4	-	-	40.5	31.9	89.7	25.9
(None,)	-	C9H19NO3S	239.144	18.06			6	-	-	1600	1850	1310	1430
(None,)	-	C9H17N5O	229.189	19.55			3.4	-	-	1.91	0.807	316	135
(None,)	-	C12H19NO2	227.178	18.27			2.1	-	-	86.3	76.5	314	108
(None,)	-	C10H12N2O3	226.119	16.02			0.3	-	-	93.7	157	134	149
(None,)	-	C9H16O3S	222.117	17.45			5.2	-	-	1160	1250	1690	1760
(None,)	-	C9H13N3O2	213.133	17.01			1.2	-	-	21	28.9	12.4	2.18
(None,)	-	C10H6O5	207.029	16.04			0.1	-	-	49	95.6	43.1	49.4
(None,)	-	C10H6O5	207.029	19.25			0.1	-	-	85.6	118	111	106
(None,)	-	C10H21NO2	205.192	24.01			3.5	-	-	89.1	97.6	96.9	97.8
(NAE 20:8)	-	C22H29NO2	340.228	17.46	NAE	Fatty Acyls [FA]	1.1	-	-	44.5	57.9	33.5	46.2
(NAE 20:3 NAE 20:3 NAE 20:3 NAE 20:3)	-	C22H39NO2	367.333	20.03	NAE	Fatty Acyls [FA]	5.2	-	-	911	628	842	696
(NAE 20:2)	-	C22H41NO2	369.353	21.95	NAE	Fatty Acyls [FA]	0.6	-	-	2320	2320	3830	5450
(NAE 20:2)	-	C22H41NO2	369.348	28.52	NAE	Fatty Acyls [FA]	1	-	-	2320	2580	2510	2490
(NAE 20:2)	-	C22H41NO2	369.348	31.9	NAE	Fatty Acyls [FA]	0.8	-	-	764	1330	2110	2110
(NA 18:2;O SPB 18:3;O2)	-	C18H33NO2	313.277	19.18		Sphingolipids [SP] Fatty Acyls [FA]	0.2	-	-	2540	656	2010	1900
(MIPC 36:0;O4 MIPC 36:0;O4)	-	C48H94NO18P	1004.64	19.87		Sphingolipids [SP]	3.2	-	-	503	764	385	381
(LysoSM 18:1;O2)	-	C23H49N2O5P	482.368	18.26	LSM	Sphingolipids [SP]	1.1	-	-	6720	6990	5870	6600
(LPS 19:1 PE 20:1;O)	-	C25H48NO9P	538.317	17.11	LPS	Glycerophospholipids [GP]	4.8	-	-	4630	6790	4980	5160
(LPS 18:1)	-	C24H46NO9P	541.32	16.92	LPS	Glycerophospholipids [GP]	4	-	-	1200	1910	1560	1600
(LPI 21:0)	-	C30H59O12P	660.402	17.36	LPI	Glycerophospholipids [GP]	2.8	-	-	138	195	238	328
(LPI 19:1)	-	C28H53O12P	630.354	16.13	LPI	Glycerophospholipids [GP]	0.6	-	-	2970	4850	3740	3820
(LPG 20:4)	-	C26H45O9P	550.317	16.82	LPG	Glycerophospholipids [GP]	4.4	-	-	4960	7710	5710	6030
(LPG 20:3 PA 23:2;O)	-	C26H47O9P	552.329	22.44	LPG	Glycerophospholipids [GP]	1.6	-	-	401	657	506	458
(LPG 18:2 PA 21:1;O)	-	C24H45O9P	509.29	16.61	LPG	Glycerophospholipids [GP]	3.4	-	-	1230	1960	1570	1590
(LPC O19:2)	-	C27H54NO6P	537.406	19.47	LPC	Glycerophospholipids [GP]	0.6	-	-	132	259	172	183
(LPC 24:1 LPE O27:2;O LPE O27:2;O)	-	C32H64NO7P	606.444	21.74	LPC	Glycerophospholipids [GP]	1	-	-	79	51.1	44.7	77.6
(LPA 21:4)	-	C24H41O7P	490.29	16.55	LPA	Glycerophospholipids [GP]	0.2	-	-	2190	3210	2650	2760
(LPA 18:3 LPA 18:3)	-	C21H37O7P	450.265	16.33	LPA	Glycerophospholipids [GP]	4.8	-	-	2620	4170	3370	3620
(LPA 13:0)	-	C16H33O7P	386.231	16.67	LPA	Glycerophospholipids [GP]	0.4	-	-	725	1080	809	890
(HexCer 41:1;O2 HexCer 41:1;O2)	-	C47H91NO8	798.685	23.66	HexCer	Sphingolipids [SP]	3.2	-	-	307	262	294	246
(HexCer 37:2;O2)	-	C43H81NO8	740.61	19.8	HexCer	Sphingolipids [SP]	2.3	-	-	240	252	259	327
(HexCer 34:2;O3 HexCer 34:2;O3 HexCer 34:2;O3 HexCer 34:2;O3 HexCer 34:2;O3 HexCer 34:2;O3 HexCer 34:2;O3)	-	C40H75NO9	731.58	21.07	HexCer	Sphingolipids [SP]	0.7	-	-	43.8	51.3	363	157
(HexCer 34:1;O3 HexCer 34:1;O3)	-	C40H77NO9	716.572	23.12	HexCer	Sphingolipids [SP]	5.6	-	-	255	338	116	389
(HexCer 33:2;O2)	-	C39H73NO8	684.538	21.54	HexCer	Sphingolipids [SP]	1	-	-	737	2100	1800	1860
(Hex3HexNAcCer 44:1;O2 Hex3HexNAcCer 44:1;O2 Hex3HexNAcCer 44:1;O2 Hex3HexNAcCer 44:1;O2 Hex3HexNAcCer 44:1;O2 Hex3HexNAcCer 44:1;O2)	-	C70H130N2O23	1384.94	22.26	HexCer	Sphingolipids [SP]	0.2	-	-	122	191	189	174
(Hex3HexNAcCer 42:2;O2 Hex3HexNAcCer 42:2;O2 Hex3HexNAcCer 42:2;O2 Hex3HexNAcCer 42:2;O2 Hex3HexNAcCer 42:2;O2 Hex3HexNAcCer 42:2;O2)	-	C68H124N2O23	1354.89	21.39	HexCer	Sphingolipids [SP]	0.7	-	-	89.4	185	354	348
(Hex3HexNAcCer 40:1;O2 Hex3HexNAcCer 40:1;O2 Hex3HexNAcCer 40:1;O2 Hex3HexNAcCer 40:1;O2 Hex3HexNAcCer 40:1;O2 Hex3HexNAcCer 40:1;O2)	-	C66H122N2O23	1311.85	21.27	HexCer	Sphingolipids [SP]	1.8	-	-	42.8	70	78.3	85.3
(Hex3HexNAcCer 38:1;O2 Hex3HexNAcCer 38:1;O2 Hex3HexNAcCer 38:1;O2 Hex3HexNAcCer 38:1;O2 Hex3HexNAcCer 38:1;O2 Hex3HexNAcCer 38:1;O2)	-	C64H118N2O23	1300.84	20.6	HexCer	Sphingolipids [SP]	6	-	-	126	205	222	217
(Hex3HexNAcCer 36:1;O2 Hex3HexNAcCer 36:1;O2 Hex3HexNAcCer 36:1;O2 Hex3HexNAcCer 36:1;O2 Hex3HexNAcCer 36:1;O2 Hex3HexNAcCer 36:1;O2)	-	C62H114N2O23	1272.81	20.29	HexCer	Sphingolipids [SP]	0.8	-	-	199	413	327	357
(Hex3HexNAcCer 36:1;O2 Hex3HexNAcCer 36:1;O2 Hex3HexNAcCer 36:1;O2 Hex3HexNAcCer 36:1;O2 Hex3HexNAcCer 36:1;O2 Hex3HexNAcCer 36:1;O2)	-	C62H114N2O23	1255.79	21.02	HexCer	Sphingolipids [SP]	0.3	-	-	259	567	432	387
(Hex3HexNAcCer 34:1;O2 Hex3HexNAcCer 34:1;O2 Hex3HexNAcCer 34:1;O2 Hex3HexNAcCer 34:1;O2 Hex3HexNAcCer 34:1;O2 Hex3HexNAcCer 34:1;O2)	-	C60H110N2O23	1244.79	20.33	HexCer	Sphingolipids [SP]	5.3	-	-	755	1510	1050	990
(Hex3Cer 42:2;O2 Hex3Cer 42:2;O2)	-	C60H111NO18	1151.82	21.64	HexCer	Sphingolipids [SP]	1.2	-	-	257	398	697	755
(Hex3Cer 42:2;O2 Hex3Cer 42:2;O2)	-	C60H111NO18	1134.79	21.63	HexCer	Sphingolipids [SP]	1.2	-	-	277	447	769	811
(Hex3Cer 36:1;O2 Hex3Cer 36:1;O2)	-	C54H101NO18	1052.7	20.88	HexCer	Sphingolipids [SP]	5.8	-	-	132	225	317	316
(Hex2HexNAcCer 42:1;O2 Hex2HexNAcCer 42:1;O2 HexHexNAcCer 42:1;O2)	-	C62H116N2O18	1177.84	2.69	HexCer	Sphingolipids [SP]	2.7	-	-	42.8	35.7	40	37.5
(Hex2HexNAcCer 40:1;O2 Hex2HexNAcCer 40:1;O2 HexHexNAcCer 40:1;O2)	-	C60H112N2O18	1166.82	40.87	HexCer	Sphingolipids [SP]	3.1	-	-	712	1120	1880	2330
(Hex2Cer 42:2;O2 Hex2Cer 42:2;O2 Hex2Cer 42:2;O2)	-	C54H101NO13	972.734	27.02	HexCer	Sphingolipids [SP]	0.1	-	-	327	371	422	417
(Hex2Cer 42:1;O2 Hex2Cer 42:1;O2 Hex2Cer 42:1;O2 Hex2Cer 42:1;O2)	-	C54H103NO13	974.755	22.31	HexCer	Sphingolipids [SP]	2.2	-	-	286	491	560	571
(FOH 33:4;O7)	-	C33H60O8	602.464	17.86	FA	Fatty Acyls [FA]	0.4	-	-	12900	17200	11200	13700
(FOH 21:1)	-	C21H42O	328.355	20.88	FA	Fatty Acyls [FA]	7.2	-	-	110	209	186	168
(FAHFA 37:4;O)	-	C37H66O4	592.535	20.64	FA	Fatty Acyls [FA]	0.7	-	-	373	1750	1310	1450
(FAHFA 36:2;O FAHFA 36:2;O FAHFA 36:2;O FAHFA 36:2;O FAHFA 36:2;O FAHFA 36:2;O FAHFA 36:2;O FAHFA 36:2;O FAHFA 36:2;O FAHFA 36:2;O)	-	C36H68O4	565.521	22.38	FA	Fatty Acyls [FA]	2.3	-	-	588	621	670	732
(FA 88:1;O2)	-	C88H174O4	1296.36	22.42	FA	Fatty Acyls [FA]	6.1	-	-	1930	2310	2630	2310
(FA 87:2;O2)	-	C87H170O4	1280.32	23.77	FA	Fatty Acyls [FA]	1	-	-	182	264	281	243
(FA 39:0 WE 39:0)	-	C39H78O2	596.629	28.79	FA	Fatty Acyls [FA]	8.7	-	-	1270	1400	1410	1440
(FA 38:0 FA 38:0 WE 38:0 WE 38:0 WE 38:0 WE 38:0)	-	C38H76O2	582.613	28.25	FA	Fatty Acyls [FA]	8.7	-	-	1920	2080	2020	2100
(FA 37:6)	-	C37H62O2	556.519	22.49	FA	Fatty Acyls [FA]	1.5	-	-	27.1	170	2060	2080
(FA 36:4 WE 36:4 WE 36:4 WE 36:4)	-	C36H64O2	529.496	21.99	FA	Fatty Acyls [FA]	2.1	-	-	891	1210	1280	1230
(FA 36:0;O)	-	C36H72O3	570.58	19.12	FA	Fatty Acyls [FA]	2.2	-	-	1680	1810	1810	1760
(FA 34:1 WE 34:1 WE 34:1 WE 34:1 WE 34:1 WE 34:1 WE 34:1 WE 34:1 WE 34:1 WE 34:1 WE 34:1 WE 34:1 WE 34:1 WE 34:1 FA 34:1 FA 34:1)	-	C34H66O2	524.543	25.15	FA	Fatty Acyls [FA]	5.3	-	-	6470	6460	6140	6350
(FA 34:1 WE 34:1 WE 34:1 WE 34:1 WE 34:1 WE 34:1 WE 34:1 WE 34:1 WE 34:1 WE 34:1 WE 34:1 WE 34:1 WE 34:1 WE 34:1 FA 34:1 FA 34:1)	-	C34H66O2	507.509	25.52	FA	Fatty Acyls [FA]	7.5	-	-	3000	3140	3010	3020
(FA 33:2 FA 33:2)	-	C33H62O2	508.51	25.51	FA	Fatty Acyls [FA]	0.7	-	-	1300	1320	1590	1680
(FA 32:1;O2 FAHFA 32:1;O FAHFA 32:1;O FAHFA 32:1;O FAHFA 32:1;O FAHFA 32:1;O FAHFA 32:1;O FAHFA 32:1;O FAHFA 32:1;O FAHFA 32:1;O FAHFA 32:1;O FAHFA 32:1;O FAHFA 32:1;O)	-	C32H62O4	528.495	21.99	FA	Fatty Acyls [FA]	5.4	-	-	2340	3160	3290	3140
(FA 32:1;O2 FAHFA 32:1;O FAHFA 32:1;O FAHFA 32:1;O FAHFA 32:1;O FAHFA 32:1;O FAHFA 32:1;O FAHFA 32:1;O FAHFA 32:1;O FAHFA 32:1;O FAHFA 32:1;O FAHFA 32:1;O FAHFA 32:1;O)	-	C32H62O4	511.466	22.01	FA	Fatty Acyls [FA]	5.5	-	-	1640	1780	1390	1360
(FA 32:1 WE 32:1 WE 32:1 WE 32:1 WE 32:1 WE 32:1 WE 32:1 FA 32:1 FA 32:1)	-	C32H62O2	496.505	24.73	FA	Fatty Acyls [FA]	6.9	-	-	3700	3590	3880	3940
(FA 32:1 WE 32:1 WE 32:1 WE 32:1 WE 32:1 WE 32:1 WE 32:1 FA 32:1 FA 32:1)	-	C32H62O2	479.478	24.72	FA	Fatty Acyls [FA]	7.4	-	-	2570	2600	2770	2800
(FA 31:2)	-	C31H58O2	480.48	24.71	FA	Fatty Acyls [FA]	4.9	-	-	927	944	1030	1010
(FA 30:4 WE 30:4 ST 30:1;O2 ST 30:1;O2)	-	C30H52O2	445.405	21.04		Sterol Lipids [ST] Fatty Acyls [FA]	0.7	-	-	1350	1630	1470	1410
(FA 30:2 FA 30:2 FA 30:2 FA 30:2 WE 30:2 WE 30:2 WE 30:2 WE 30:2)	-	C30H56O2	466.461	24.3	FA	Fatty Acyls [FA]	3.2	-	-	454	467	509	528
(FA 30:1;O2 FA 30:1;O2 FAHFA 30:1;O)	-	C30H58O4	500.464	21.57	FA	Fatty Acyls [FA]	5.1	-	-	1510	2650	2520	2420
(FA 30:1;O2 FA 30:1;O2 FAHFA 30:1;O)	-	C30H58O4	483.436	21.82	FA	Fatty Acyls [FA]	8.3	-	-	1140	1330	1100	1170
(FA 29:1 FA 29:1 WE 29:1)	-	C29H56O2	454.464	20.05	FA	Fatty Acyls [FA]	1.9	-	-	81.4	100	95	106
(FA 29:1 FA 29:1 WE 29:1)	-	C29H56O2	454.462	24.24	FA	Fatty Acyls [FA]	0	-	-	618	617	679	627
(FA 28:8)	-	C28H40O2	426.34	18.02	FA	Fatty Acyls [FA]	1.3	-	-	25.4	56.6	50.5	24.7
(FA 28:6 ST 28:3;O2 ST 28:3;O2)	-	C28H44O2	430.369	19.08		Sterol Lipids [ST] Fatty Acyls [FA]	3.7	-	-	93.3	22.9	88.2	52.5
(FA 27:4 FA 27:4 ST 27:1;O2 ST 27:1;O2 ST 27:1;O2 ST 27:1;O2 ST 27:1;O2 ST 27:1;O2 ST 27:1;O2 ST 27:1;O2 ST 27:1;O2 ST 27:1;O2 ST 27:1;O2 ST 27:1;O2 ST 27:1;O2 ST 27:1;O2 ST 27:1;O2 ST 27:1;O2 ST 27:1;O2 ST 27:1;O2 ST 27:1;O2 ST 27:1;O2 ST 27:1;O2 ST 27:1;O2 ST 27:1;O2 ST 27:1;O2 ST 27:1;O2 ST 27:1;O2)	-	C27H46O2	403.36	20.24		Sterol Lipids [ST] Fatty Acyls [FA]	0.4	-	-	724	1000	1040	1000
(FA 26:7;O3)	-	C26H38O5	448.308	17.53	FA	Fatty Acyls [FA]	1.9	-	-	2860	3740	2990	3430
(FA 26:6;O4 FA 26:6;O4)	-	C26H40O6	449.289	17.2	FA	Fatty Acyls [FA]	0.7	-	-	302	456	379	222
(FA 26:2;O4)	-	C26H48O6	457.351	19.49	FA	Fatty Acyls [FA]	0.8	-	-	992	868	1000	885
(FA 26:1;O2 FAHFA 26:1;O FAHFA 27:1;O)	-	C26H50O4	444.407	21.13	FA	Fatty Acyls [FA]	2.8	-	-	6080	6880	6080	5270
(FA 26:1;O2 FAHFA 26:1;O FAHFA 27:1;O)	-	C26H50O4	427.378	20.87	FA	Fatty Acyls [FA]	0.4	-	-	7250	7940	7680	7590
(FA 25:5;O6 ST 19:0;O2;GlcA ST 19:0;O2;GlcA ST 19:0;O2;GlcA ST 19:0;O2;GlcA)	-	C25H40O8	486.302	18.68		Sterol Lipids [ST] Fatty Acyls [FA]	3.8	-	-	55.1	84.7	21.4	137
(FA 24:2;O)	-	C24H44O3	381.336	18.31	FA	Fatty Acyls [FA]	0.1	-	-	10500	14300	11200	10700
(FA 24:12)	-	C24H24O2	362.214	15.84	FA	Fatty Acyls [FA]	4.5	-	-	3880	7030	6300	6320
(FA 23:4 ST 23:1;O2 ST 23:1;O2 ST 23:1;O2 ST 23:1;O2)	-	C23H38O2	364.318	18.49		Sterol Lipids [ST] Fatty Acyls [FA]	3.1	-	-	251	494	6060	4430
(FA 22:4;O3 FA 22:4;O3 FA 22:4;O3 FA 22:4;O3 FA 22:4;O3 FA 22:4;O3 ST 22:1;O5 ST 22:1;O5 ST 22:1;O5 ST 22:1;O5 ST 22:1;O5 ST 22:1;O5)	-	C22H36O5	398.288	17.61		Sterol Lipids [ST] Fatty Acyls [FA]	5.3	-	-	127	105	59	386
(FA 22:4;O FA 22:4;O ST 22:1;O3)	-	C22H36O3	366.295	19.53		Sterol Lipids [ST] Fatty Acyls [FA]	3	-	-	696	721	559	160
(FA 22:4 FA 22:4 FA 22:4 FA 22:4 FA 22:4 FA 22:4 FA 22:4 FA 22:4 FA 22:4 WE 22:4)	-	C22H36O2	350.304	18.49	FA	Fatty Acyls [FA]	0.6	-	-	542	548	1060	1110
(FA 22:3 FA 22:3 FA 22:3 FA 22:3 FA 22:3 FA 22:3 FA 22:3 FA 22:3 FA 22:3 FA 22:3 FA 22:3 FA 22:3 FA 22:3 FA 22:3 WE 22:3 WE 22:3)	-	C22H38O2	335.294	19.47	FA	Fatty Acyls [FA]	0.6	-	-	921	1180	651	544
(FA 22:2 FA 22:2 FA 22:2 FA 22:2 FA 22:2 FA 22:2 FA 22:2 FA 22:2 FA 22:2 FA 22:2 FA 22:2 FA 22:2 WE 22:2 WE 22:2 WE 22:2)	-	C22H40O2	337.309	18.54	FA	Fatty Acyls [FA]	0.7	-	-	4900	6920	4580	4610
(FA 20:7;O FA 20:7;O)	-	C20H26O3	332.221	17.07	FA	Fatty Acyls [FA]	0.7	-	-	234	241	84.7	49.6
(FA 20:6;O3 FA 20:6;O3 FA 20:6;O3 WE 20:6;O3)	-	C20H28O5	349.21	17.54	FA	Fatty Acyls [FA]	3.1	-	-	78.8	93.4	906	965
(FA 20:5;O3 FA 20:5;O3 FA 20:5;O3 FA 20:5;O3 FA 20:5;O3 FA 20:5;O3 FA 20:5;O3 FA 20:5;O3 FA 20:5;O3 FA 20:5;O3 FA 20:5;O3 FA 20:5;O3 FA 20:5;O3 FA 20:5;O3 FA 20:5;O3 FA 20:5;O3 FA 20:5;O3 FA 20:5;O3 FA 20:5;O3 FA 20:5;O3 FA 20:5;O3 FA 20:5;O3 FA 20:5;O3 FA 20:5;O3 FA 20:5;O3 FA 20:5;O3)	-	C20H30O5	351.215	16.74	FA	Fatty Acyls [FA]	3	-	-	1080	1520	1170	1260
(FA 20:2;O FA 20:2;O FA 20:2;O FA 20:2;O FA 20:2;O FA 20:2;O FA 20:2;O)	-	C20H36O3	342.3	19.49	FA	Fatty Acyls [FA]	1.3	-	-	626	728	599	618
(FA 19:3;O6 FA 19:3;O6 FA 19:3;O6 FA 19:3;O6)	-	C19H32O8	406.242	16.61	FA	Fatty Acyls [FA]	0.7	-	-	1570	2180	1670	1710
(FA 19:2;O FA 19:2;O)	-	C19H34O3	328.285	19.2	FA	Fatty Acyls [FA]	5.7	-	-	596	394	184	376
(FA 17:0 FA 17:0 FA 17:0 FA 17:0 FA 17:0 FA 17:0 FA 17:0 FA 17:0 FA 17:0 FA 17:0 FA 17:0 FA 17:0 FA 17:0 FA 17:0 FA 17:0 FA 17:0 FA 17:0 FA 17:0 FA 17:0 FA 17:0 WE 17:0 WE 17:0 WE 17:0 WE 17:0 WE 17:0 WE 17:0 WE 17:0 WE 17:0 WE 17:0 WE 17:0 WE 17:0 WE 17:0)	-	C17H34O2	288.287	20.54	FA	Fatty Acyls [FA]	7.7	-	-	1230	1230	1650	1560
(FA 16:2;O5)	-	C16H28O7	350.214	16.72	FA	Fatty Acyls [FA]	5	-	-	3600	5510	4240	4240
(FA 12:1;O4)	-	C12H22O6	280.172	17.86	FA	Fatty Acyls [FA]	3.5	-	-	11.5	17.6	17.3	29.3
(DGDG 36:4)	-	C69H118O17	1219.84	31.3	DGDG	Glycerolipids [GL]	1.1	-	-	34.9	69.9	165	165
(DG O32:2)	-	C35H66O4	551.5	22.54	DAG	Glycerolipids [GL]	2.7	-	-	2130	1940	2100	2110
(DG 43:4)	-	C46H82O5	715.626	24.81	DAG	Glycerolipids [GL]	1.6	-	-	94.2	106	148	152
(DG 42:8 DG 42:8 DG 42:8 DG 42:8)	-	C45H72O5	693.548	21.21	DAG	Glycerolipids [GL]	5.8	-	-	615	972	1320	1540
(DG 42:1 DG 42:1)	-	C45H86O5	724.676	24.66	DAG	Glycerolipids [GL]	4	-	-	299	340	326	335
(DG 41:1 DG 41:1 DG 41:1)	-	C44H84O5	710.665	24.4	DAG	Glycerolipids [GL]	0.8	-	-	262	274	361	378
(DG 38:4 DG 38:4 DG 38:4 DG 38:4 DG 38:4 DG 38:4 DG 38:4 DG 38:4)	-	C41H72O5	662.575	22.75	DAG	Glycerolipids [GL]	0	-	-	443	913	1450	1320
(DG 38:0 DG 38:0 DG 38:0 DG 38:0 DG 38:0)	-	C41H80O5	670.638	30.55	DAG	Glycerolipids [GL]	1.7	-	-	587	279	185	293
(DG 35:5 DG 35:5 DG 35:5 DG 35:5 DG 35:5 DG 35:5)	-	C38H64O5	618.505	19.87	DAG	Glycerolipids [GL]	0.2	-	-	75.6	157	90.4	93.1
(DG 35:2)	-	C37[13]CH70O5	625.565	23.28	DAG	Glycerolipids [GL]	7.6	-	-	865	878	871	857
(DG 35:0 DG 35:0 DG 35:0 DG 35:0 DG 35:0)	-	C38H74O5	628.597	23.6	DAG	Glycerolipids [GL]	2.1	-	-	379	6.12	165	160
(DG 34:3 DG 34:3 DG 34:3 DG 34:3 DG 34:3 DG 34:3 DG 34:3)	-	C37H66O5	591.5	20.32	DAG	Glycerolipids [GL]	0.2	-	-	22.6	10.8	30.7	10.5
(DG 34:2 DG 34:2 DG 34:2 DG 34:2 DG 34:2 DG 34:2 DG 34:2)	-	C37H68O5	610.54	22.23	DAG	Glycerolipids [GL]	0.3	-	-	1080	1500	1940	1920
(CPA 16:0)	-	C19H37O6P	393.241	17.37	CPA	Glycerophospholipids [GP]	1.6	-	-	382	827	665	701
(CoA 9:0)	-	C30H52N7O17P3S	925.269	20.82	CoA	Fatty Acyls [FA]	0.2	-	-	4330	10200	11600	6110
(CoA 6:2;O5)	-	C27H42N7O22P3S	942.145	23.25	CoA	Fatty Acyls [FA]	3.6	-	-	48.6	82.4	79.8	91
(CoA 20:5;O)	-	C41H64N7O18P3S	1068.33	25.8	CoA	Fatty Acyls [FA]	1.8	-	-	84	120	149	127
(CoA 14:1 CoA 14:1 CoA 14:1 CoA 14:1 CoA 14:1 CoA 14:1)	-	C35H60N7O17P3S	993.33	2.82	CoA	Fatty Acyls [FA]	0.4	-	-	34.5	27.3	26.9	24.4
(CoA 14:0)	-	C35H62N7O17P3S	995.345	25.94	CoA	Fatty Acyls [FA]	8.2	-	-	213	251	349	361
(CoA 12:2 CoA 12:2 CoA 12:2)	-	C33H54N7O17P3S	946.258	24.97	CoA	Fatty Acyls [FA]	0.1	-	-	71.9	103	117	109
(CoA 11:2;O3)	-	C32H52N7O20P3S	997.255	17.47	CoA	Fatty Acyls [FA]	3.3	-	-	39.4	91.5	114	85.6
(CoA 10:2 CoA 10:2 CoA 10:2 CoA 10:2)	-	C31H50N7O17P3S	918.23	23.01	CoA	Fatty Acyls [FA]	1.7	-	-	37.2	40.1	51	76.4
(CoA 10:0 CoA 10:0)	-	C31H54N7O17P3S	939.283	21.65	CoA	Fatty Acyls [FA]	0.3	-	-	1050	2950	3200	3040
(CL 72:5 CL 72:5 CL 72:5 CL 72:5 CL 72:5 CL 72:5 CL 72:5 CL 72:5 CL 72:5 CL 72:5 CL 72:5 CL 72:5 CL 72:5 CL 72:5 CL 72:5 CL 72:5 CL 72:5 CL 72:5 CL 72:5 CL 72:5 CL 72:5 CL 72:5 CL 72:5 CL 72:5 CL 72:5 CL 72:5 CL 72:5 CL 72:5 CL 72:5 CL 72:5 CL 72:5 CL 72:5 CL 72:5 CL 72:5 CL 72:5 CL 72:5 CL 72:5 CL 72:5 CL 72:5 CL 72:5)	-	C81H148O17P2	1473.04	25.32	CL	Glycerophospholipids [GP]	5.7	-	-	70.1	103	148	144
(CL 72:4 CL 72:4 CL 72:4 CL 72:4 CL 72:4 CL 72:4 CL 72:4 CL 72:4 CL 72:4 CL 72:4 CL 72:4 CL 72:4 CL 72:4 CL 72:4 CL 72:4 CL 72:4 CL 72:4 CL 72:4 CL 72:4 CL 72:4 CL 72:4 CL 72:4 CL 72:4 CL 72:4 CL 72:4 CL 72:4 CL 72:4 CL 72:4 CL 72:4 CL 72:4 CL 72:4 CL 72:4 CL 72:4 CL 72:4 CL 72:4 CL 72:4 CL 72:4 CL 72:4 CL 72:4 CL 72:4 CL 72:4 CL 72:4 CL 72:4 CL 72:4 CL 72:4 CL 72:4 CL 72:4 CL 72:4 CL 72:4 CL 72:…	-	C81H150O17P2	1475.06	25.67	CL	Glycerophospholipids [GP]	5.2	-	-	55.6	82.3	91	110
(CL 70:5 CL 70:5 CL 70:5 CL 70:5 CL 70:5 CL 70:5 CL 70:5 CL 70:5 CL 70:5 CL 70:5 CL 70:5 CL 70:5 CL 70:5 CL 70:5 CL 70:5 CL 70:5 CL 70:5 CL 70:5 CL 70:5 CL 70:5 CL 70:5 CL 70:5 CL 70:5 CL 70:5)	-	C79H144O17P2	1445.01	24.81	CL	Glycerophospholipids [GP]	5.4	-	-	94.9	144	229	238
(CL 70:4 CL 70:4 CL 70:4 CL 70:4 CL 70:4 CL 70:4 CL 70:4 CL 70:4 CL 70:4 CL 70:4 CL 70:4 CL 70:4 CL 70:4 CL 70:4 CL 70:4 CL 70:4 CL 70:4 CL 70:4 CL 70:4 CL 70:4 CL 70:4 CL 70:4 CL 70:4 CL 70:4 CL 70:4 CL 70:4 CL 70:4 CL 70:4 CL 70:4 CL 70:4 CL 70:4 CL 70:4 CL 70:4 CL 70:4 CL 70:4 CL 70:4)	-	C79H146O17P2	1447.03	25.07	CL	Glycerophospholipids [GP]	7.1	-	-	91.8	137	211	225
(CL 68:4 CL 68:4 CL 68:4 CL 68:4 CL 68:4 CL 68:4 CL 68:4 CL 68:4 CL 68:4 CL 68:4)	-	C77H142O17P2	1419	24.6	CL	Glycerophospholipids [GP]	4.4	-	-	79.9	128	240	240
(Cer 44:2;O2 Cer 44:2;O2)	-	C44H85NO3	676.665	24.23	CER	Sphingolipids [SP]	5.8	-	-	1790	2280	3130	3170
(Cer 44:1;O Cer 44:1;O)	-	C44H87NO2	679.707	31.93	CER	Sphingolipids [SP]	1.1	-	-	70	76.6	78.2	81.3
(Cer 44:1;O Cer 44:1;O)	-	C44H87NO2	662.675	30.05	CER	Sphingolipids [SP]	8.6	-	-	224	223	255	236
(Cer 42:1;O Cer 42:1;O)	-	C42H83NO2	634.644	28.72	CER	Sphingolipids [SP]	7.7	-	-	891	931	900	933
(Cer 40:2;O3)	-	C40H77NO4	653.608	24.09	CER	Sphingolipids [SP]	3.8	-	-	304	205	283	253
(Cer 40:1;O)	-	C40H79NO2	623.647	29.18	CER	Sphingolipids [SP]	1.1	-	-	544	581	563	561
(Cer 40:0;O4 Cer 40:0;O4 Cer 40:0;O4 Cer 40:0;O4)	-	C40H81NO5	673.65	20.27	CER	Sphingolipids [SP]	6.5	-	-	449	413	425	465
(Cer 38:2;O2 Cer 38:2;O2 Cer 38:2;O2 Cer 38:2;O2 Cer 38:2;O2)	-	C38H73NO3	592.568	22.52	CER	Sphingolipids [SP]	0.9	-	-	754	1130	1660	1620
(Cer 38:1;O)	-	C38H75NO2	595.616	27.92	CER	Sphingolipids [SP]	3	-	-	1130	1160	1060	1080
(Cer 38:0;O)	-	C38H77NO2	597.631	28.84	CER	Sphingolipids [SP]	1.1	-	-	538	585	591	565
(Cer 36:2;O2 Cer 36:2;O2 Cer 36:2;O2 Cer 36:2;O2 Cer 36:2;O2 Cer 36:2;O2)	-	C36H69NO3	564.533	21.98	CER	Sphingolipids [SP]	0.3	-	-	658	1090	1520	1480
(Cer 36:1;O)	-	C36H71NO2	567.58	19.63	CER	Sphingolipids [SP]	0.6	-	-	215	195	356	316
(Cer 36:1;O)	-	C36H71NO2	567.585	26.83	CER	Sphingolipids [SP]	2.9	-	-	1660	1740	1700	1690
(Cer 36:0;O4 Cer 36:0;O4)	-	C36H73NO5	617.588	19.66	CER	Sphingolipids [SP]	8.6	-	-	159	159	243	262
(Cer 36:0;O3 Cer 36:0;O3 Cer 36:0;O3 Cer 36:0;O3)	-	C36H73NO4	584.565	19.27	CER	Sphingolipids [SP]	6	-	-	264	439	417	369
(Cer 36:0;O2 Cer 36:0;O2)	-	C36H73NO3	568.568	23.89	CER	Sphingolipids [SP]	1.5	-	-	547	387	594	225
(Cer 36:0;O)	-	C36H73NO2	569.599	27.68	CER	Sphingolipids [SP]	1.7	-	-	741	803	745	760
(Cer 35:2;O3)	-	C35H67NO4	583.537	26.57	CER	Sphingolipids [SP]	3.8	-	-	551	480	481	478
(Cer 34:1;O)	-	C34H67NO2	539.554	25.92	CER	Sphingolipids [SP]	2.7	-	-	1760	1700	1640	1670
(Cer 34:0;O)	-	C34H69NO2	541.569	26.56	CER	Sphingolipids [SP]	1.9	-	-	762	816	809	780
(Cer 32:2;O3 Cer 32:2;O3)	-	C32H61NO4	541.49	25.2	CER	Sphingolipids [SP]	5.3	-	-	336	327	314	295
(CE 20:4)	-	C47H76O2	690.609	19.79	CE	Sterol Lipids [ST]	0.2	-	-	49.1	62	87.3	102
(CE 20:4)	-	C47H76O2	673.582	23.48	CE	Sterol Lipids [ST]	3.3	-	-	83.8	205	267	275
(CE 20:1)	-	C47H82O2	696.659	27.25	CE	Sterol Lipids [ST]	8.1	-	-	297	405	325	328
(CE 20:1)	-	C47H82O2	679.641	24.56	CE	Sterol Lipids [ST]	2.6	-	-	121	231	176	183
(CE 16:3)	-	C43H70O2	636.575	20.54	CE	Sterol Lipids [ST]	5.2	-	-	589	1120	1070	941
(CDPDG 40:4 CDPDG 40:4)	-	C52H89N3O15P2	1058.58	17.13	CDPDG	Glycerophospholipids [GP]	2.1	-	-	1100	1810	1270	1380
(CDPDG 36:2 CDPDG 36:2 CDPDG 36:2 CDPDG 36:2)	-	C48H85N3O15P2	1006.55	17.06	CDPDG	Glycerophospholipids [GP]	0.4	-	-	1210	1920	1460	1510
(CDPDG 32:0)	-	C44H81N3O15P2	954.523	17.01	CDPDG	Glycerophospholipids [GP]	1.9	-	-	1540	2410	1970	1960
(CAR 7:0)	-	C14H27NO4	291.224	17.9	CAR	Fatty Acyls [FA]	2.7	-	-	591	709	25.5	51.2
(CAR 4:0 CAR 4:0 CAR 4:0)	-	C11H21NO4	249.179	17.62	CAR	Fatty Acyls [FA]	1.8	-	-	560	483	469	508
(CAR 26:0 NA 33:1;O3 Cer 33:1;O3 Cer 33:1;O3)	-	C33H65NO4	557.52	26.42	CAR	Sphingolipids [SP] Fatty Acyls [FA]	5.7	-	-	543	493	495	508
(CAR 22:0)	-	C29H57NO4	501.465	21.59	CAR	Fatty Acyls [FA]	3.1	-	-	608	1080	1030	1010
(CAR 22:0)	-	C29H57NO4	501.46	24.74	CAR	Fatty Acyls [FA]	3.8	-	-	397	336	339	344
(CAR 14:0 CAR 14:0 NA 21:1;O3)	-	C21H41NO4	389.348	20.66	CAR	Fatty Acyls [FA]	3	-	-	1350	2260	2360	2230
(CAR 12:1;O)	-	C19H35NO5	375.284	17.71	CAR	Fatty Acyls [FA]	0.9	-	-	5250	8310	5980	7930

## Sheet: Supplementary Table8
Table S8: lipids identified in WM115 by SMFinder
Lipid Groups	Lipid name	chemical formula	mz	rt	Lipid class	Category	ppm	MS2 score	MS2 FDR	WM115_sample1 area	WM115_sample1r area	WM115_sample2 area	WM115_sample2r area
Vitamin A	Vitamin A	C20H30O	287.24	20.89		Sterol Lipids [ST]	1.2	0.44	0.02	4040	2060	1080	1500
Triethylene glycol bis(2-ethylhexanoate)	Triethylene glycol bis(2-ethylhexanoate)	C22H42O6	403.298	20.59	FA	Fatty Acyls [FA]	1.1	0.91	0.046	3320	3080	2930	2820
Triethylene glycol bis(2-ethylhexanoate)	Triethylene glycol bis(2-ethylhexanoate)	C22H42O6	420.328	20.87	FA	Fatty Acyls [FA]	0.3	0.91	0.076	14600	10700	12400	11600
TAG (18:1-18:1-20:4)	TAG (18:1-18:1-20:4)	C59H102O6	924.799	36.5	TAG	Glycerolipids [GL]	1.9	0.57	0.002	19400	19600	20100	16900
TAG (18:1-18:1-20:4)	TAG (18:1-18:1-20:4)	C59H102O6	907.771	37.66	TAG	Glycerolipids [GL]	4.1	0.39	0.002	1730	1630	1700	1620
TAG (18:1-18:1-18:2)	TAG (18:1-18:1-18:2)	C57H102O6	900.798	36.5	TAG	Glycerolipids [GL]	2.6	0.88	0.002	19000	18700	19100	17300
TAG (17:1-18:2-18:2)	TAG (17:1-18:2-18:2)	C56H98O6	884.765	35.17	TAG	Glycerolipids [GL]	4.3	0.39	0.004	1160	1170	1190	1010
TAG (16:1-18:2-18:2)	TAG (16:1-18:2-18:2)	C55H96O6	870.747	41.82	TAG	Glycerolipids [GL]	7.9	0.37	0.002	3170	3210	3350	3170
TAG (15:0-18:1-18:2)	TAG (15:0-18:1-18:2)	C54H98O6	860.766	35.2	TAG	Glycerolipids [GL]	2.6	0.63	0.002	5540	5420	5380	4800
TAG (15:0-18:1-18:1)	TAG (15:0-18:1-18:1)	C54H100O6	862.783	36.28	TAG	Glycerolipids [GL]	2	0.81	0.002	14000	14600	14900	13800
TAG(25:1/18:1/18:1)	TAG(25:1/18:1/18:1)	C64H118O6	1000.92	48.88	TAG	Glycerolipids [GL]	0.9	0.68	0.036	6240	5640	7280	6670
TAG(20:1/18:1/22:5)	TAG(20:1/18:1/22:5)	C63H108O6	978.843	38.81	TAG	Glycerolipids [GL]	3.1	0.36	0.014	1690	1660	1720	1560
TAG(20:1/18:1/22:4)	TAG(20:1/18:1/22:4)	C63H110O6	980.859	40.07	TAG	Glycerolipids [GL]	4	0.2	0.098	1230	1130	1260	1130
TAG(20:1/18:1/18:1)	TAG(20:1/18:1/18:1)	C59H108O6	930.845	39.68	TAG	Glycerolipids [GL]	2.8	0.73	0.002	3620	3370	4200	3610
TAG(19:1/18:1/18:1)	TAG(19:1/18:1/18:1)	C58H106O6	916.827	38.59	TAG	Glycerolipids [GL]	5.3	0.74	0.002	1920	1950	2100	1760
TAG(19:1/16:0/18:1)	TAG(19:1/16:0/18:1)	C56H104O6	890.811	38.08	TAG	Glycerolipids [GL]	4.9	0.74	0.002	7740	7700	8760	8020
TAG(18:1/20:4/22:5)	TAG(18:1/20:4/22:5)	C63H102O6	972.796	35.88	TAG	Glycerolipids [GL]	4.7	0.29	0.018	2300	2150	2150	1720
TAG(18:1/20:4/22:4)	TAG(18:1/20:4/22:4)	C63H104O6	974.812	36.91	TAG	Glycerolipids [GL]	3.6	0.54	0.024	2430	2320	2360	2040
TAG(18:1/20:4/22:3)	TAG(18:1/20:4/22:3)	C63H106O6	976.827	37.72	TAG	Glycerolipids [GL]	3.6	0.41	0.01	1630	1660	1570	1500
TAG(18:1/18:3/21:1)	TAG(18:1/18:3/21:1)	C60H106O6	940.828	38.33	TAG	Glycerolipids [GL]	4.9	0.33	0.052	988	1000	895	822
TAG(18:1/18:2/18:2)	TAG(18:1/18:2/18:2)	C57H100O6	898.784	36.08	TAG	Glycerolipids [GL]	1.7	0.6	0.002	14900	14600	15300	13400
TAG(18:1/18:1/24:1)	TAG(18:1/18:1/24:1)	C63H116O6	986.904	44.5	TAG	Glycerolipids [GL]	5.2	0.75	0.002	510	533	668	605
TAG(18:1/18:1/22:6)	TAG(18:1/18:1/22:6)	C61H102O6	948.798	36.41	TAG	Glycerolipids [GL]	3.3	0.26	0.018	5940	6030	6240	5320
TAG(18:1/18:1/20:3)	TAG(18:1/18:1/20:3)	C59H104O6	926.812	37.29	TAG	Glycerolipids [GL]	1.9	0.34	0.03	13800	13900	13500	12700
TAG(18:1/18:1/18:1)	TAG(18:1/18:1/18:1)	C57H104O6	902.816	37.65	TAG	Glycerolipids [GL]	0.2	0.74	0.002	35600	33500	38700	32400
TAG(18:1/17:1/18:2)	TAG(18:1/17:1/18:2)	C56H100O6	886.781	35.71	TAG	Glycerolipids [GL]	4	0.63	0.002	2310	2400	2350	2210
TAG(18:1/17:1/18:1)	TAG(18:1/17:1/18:1)	C56H102O6	888.797	36.77	TAG	Glycerolipids [GL]	3.4	0.67	0.002	5530	5590	5920	5350
TAG(18:1/14:0/18:3)	TAG(18:1/14:0/18:3)	C53H94O6	844.734	33.81	TAG	Glycerolipids [GL]	4	0.26	0.028	3110	3060	3310	2860
TAG(18:0/18:1/22:6)	TAG(18:0/18:1/22:6)	C61H104O6	950.813	36.96	TAG	Glycerolipids [GL]	2.7	0.33	0.036	9270	9130	9290	8240
TAG(18:0/16:0/18:1)	TAG(18:0/16:0/18:1)	C55H104O6	878.815	38.7	TAG	Glycerolipids [GL]	1.3	0.81	0.002	24400	26700	33100	28200
TAG(18:0/16:0/18:0)	TAG(18:0/16:0/18:0)	C55H106O6	880.828	40.39	TAG	Glycerolipids [GL]	3.6	0.67	0.002	1980	1780	2590	2220
TAG(18:0/16:0/16:0)	TAG(18:0/16:0/16:0)	C53H102O6	852.797	38.23	TAG	Glycerolipids [GL]	3.4	0.94	0.002	5670	6000	7970	7790
TAG(16:1/20:4/22:5)	TAG(16:1/20:4/22:5)	C61H98O6	927.739	35.96	TAG	Glycerolipids [GL]	4.6	0.95	0.002	708	474	659	624
TAG(16:1/18:1/22:6)	TAG(16:1/18:1/22:6)	C59H98O6	903.738	35.99	TAG	Glycerolipids [GL]	4.9	0.94	0.002	889	753	856	709
TAG(16:1/18:1/22:6)	TAG(16:1/18:1/22:6)	C59H98O6	920.765	34.78	TAG	Glycerolipids [GL]	3.6	0.24	0.014	2810	2850	2810	2560
TAG(16:1/18:1/20:4)	TAG(16:1/18:1/20:4)	C57H98O6	896.765	35.02	TAG	Glycerolipids [GL]	3.2	0.46	0.002	10800	10300	11300	9980
TAG(16:1/18:1/20:4)	TAG(16:1/18:1/20:4)	C57H98O6	879.741	35.95	TAG	Glycerolipids [GL]	1.9	0.38	0.004	2060	1930	2080	1960
TAG(16:1/18:1/18:3)	TAG(16:1/18:1/18:3)	C55H96O6	853.724	35.47	TAG	Glycerolipids [GL]	3.1	0.98	0.002	3150	2850	3090	2840
TAG(16:1/18:1/18:2)	TAG(16:1/18:1/18:2)	C55H98O6	872.766	34.97	TAG	Glycerolipids [GL]	3	0.54	0.002	10800	10600	10900	10000
TAG(16:1/18:1/18:1)	TAG(16:1/18:1/18:1)	C55H100O6	874.785	36.8	TAG	Glycerolipids [GL]	0.4	0.65	0.002	34200	32900	34900	30700
TAG(16:1/16:1/22:5)	TAG(16:1/16:1/22:5)	C57H96O6	894.75	34.3	TAG	Glycerolipids [GL]	2.2	0.55	0.002	2290	2380	2710	2250
TAG(16:1/16:1/18:1)	TAG(16:1/16:1/18:1)	C53H96O6	846.752	30.95	TAG	Glycerolipids [GL]	2.2	0.61	0.002	4270	1730	2180	4500
TAG(16:1/16:1/18:1)	TAG(16:1/16:1/18:1)	C53H96O6	846.751	34.46	TAG	Glycerolipids [GL]	1.6	0.63	0.002	12200	12300	13400	11800
TAG(16:1/16:1/16:1)	TAG(16:1/16:1/16:1)	C51H92O6	818.719	29.27	TAG	Glycerolipids [GL]	4.4	0.74	0.002	5600	5030	5350	5020
TAG(16:1/16:1/16:1)	TAG(16:1/16:1/16:1)	C51H92O6	818.72	33.05	TAG	Glycerolipids [GL]	2.6	0.75	0.002	7860	7810	8370	7600
TAG(16:1/14:0/17:1)	TAG(16:1/14:0/17:1)	C50H92O6	806.722	29.32	TAG	Glycerolipids [GL]	0.6	0.69	0.002	12600	11200	11400	12100
TAG(16:1/14:0/17:1)	TAG(16:1/14:0/17:1)	C50H92O6	806.721	33.17	TAG	Glycerolipids [GL]	1.4	0.69	0.002	14500	15400	15800	13700
TAG(16:1/14:0/16:1)	TAG(16:1/14:0/16:1)	C49H90O6	792.703	28.37	TAG	Glycerolipids [GL]	4.9	0.78	0.002	11700	10800	10500	10400
TAG(16:1/14:0/16:1)	TAG(16:1/14:0/16:1)	C49H90O6	792.704	32.55	TAG	Glycerolipids [GL]	3.4	0.79	0.002	12500	12700	12300	12200
TAG(16:0/20:4/22:2)	TAG(16:0/20:4/22:2)	C61H106O6	952.828	37.64	TAG	Glycerolipids [GL]	3.5	0.3	0.018	2070	2170	2170	6850
TAG(16:0/18:3/24:2)	TAG(16:0/18:3/24:2)	C61H108O6	954.844	39.49	TAG	Glycerolipids [GL]	3.2	0.36	0.022	3170	3080	3210	2880
TAG(16:0/18:1/24:1)	TAG(16:0/18:1/24:1)	C61H114O6	960.889	43.85	TAG	Glycerolipids [GL]	5	0.8	0.002	999	988	1320	1070
TAG(16:0/18:1/22:6)	TAG(16:0/18:1/22:6)	C59H100O6	922.784	36	TAG	Glycerolipids [GL]	1.4	0.47	0.002	11700	11300	12000	10400
TAG(16:0/18:1/22:1)	TAG(16:0/18:1/22:1)	C59H110O6	932.86	41.4	TAG	Glycerolipids [GL]	3.6	0.72	0.002	1910	1990	2480	1960
TAG(16:0/18:1/21:1)	TAG(16:0/18:1/21:1)	C58H108O6	918.843	40.23	TAG	Glycerolipids [GL]	4.3	0.68	0.002	1430	1280	1510	1360
TAG(16:0/18:1/20:4)	TAG(16:0/18:1/20:4)	C57H100O6	881.755	37.16	TAG	Glycerolipids [GL]	2.9	0.96	0.002	3950	3820	4540	4030
TAG(16:0/18:1/20:1)	TAG(16:0/18:1/20:1)	C57H106O6	904.832	39.19	TAG	Glycerolipids [GL]	1.2	0.7	0.002	22400	21600	25100	23000
TAG(16:0/18:1/18:1)	TAG(16:0/18:1/18:1)	C55H102O6	876.802	37.17	TAG	Glycerolipids [GL]	0.5	0.8	0.002	94400	96200	111000	101000
TAG(16:0/17:1/18:3)	TAG(16:0/17:1/18:3)	C54H96O6	841.721	35.78	TAG	Glycerolipids [GL]	7.3	0.97	0.002	1240	1220	1180	1170
TAG(16:0/17:0/18:1)	TAG(16:0/17:0/18:1)	C54H102O6	864.798	37.63	TAG	Glycerolipids [GL]	2.3	0.76	0.002	9650	9970	11500	9600
TAG(16:0/16:1/20:4)	TAG(16:0/16:1/20:4)	C55H96O6	870.747	34.43	TAG	Glycerolipids [GL]	8.4	0.42	0.006	3110	2850	2240	1120
TAG(16:0/16:1/18:1)	TAG(16:0/16:1/18:1)	C53H98O6	848.755	35.15	TAG	Glycerolipids [GL]	0.8	0.69	0.002	53100	50600	56800	47500
TAG(16:0/16:1/17:1)	TAG(16:0/16:1/17:1)	C52H96O6	834.751	31.17	TAG	Glycerolipids [GL]	3.7	0.76	0.002	8750	3430	8690	8300
TAG(16:0/16:1/17:1)	TAG(16:0/16:1/17:1)	C52H96O6	834.751	34.73	TAG	Glycerolipids [GL]	1.8	0.77	0.002	17000	17500	17100	16300
TAG(16:0/16:1/16:1)	TAG(16:0/16:1/16:1)	C51H94O6	820.737	33.98	TAG	Glycerolipids [GL]	0.5	0.71	0.002	25100	26700	26600	25000
TAG(16:0/16:0/22:1)	TAG(16:0/16:0/22:1)	C57H108O6	906.844	40.93	TAG	Glycerolipids [GL]	3.2	0.69	0.002	3350	3260	4560	3910
TAG(16:0/16:0/18:1)	TAG(16:0/16:0/18:1)	C53H100O6	850.782	36.29	TAG	Glycerolipids [GL]	0.1	0.9	0.002	57900	59500	78700	64300
TAG(16:0/16:0/17:1)	TAG(16:0/16:0/17:1)	C52H98O6	836.769	35.81	TAG	Glycerolipids [GL]	0.5	0.78	0.002	20800	21100	22100	19300
TAG(16:0/16:0/16:1)	TAG(16:0/16:0/16:1)	C51H96O6	822.751	34.7	TAG	Glycerolipids [GL]	0.6	0.84	0.002	40200	45400	46900	43000
TAG(16:0/16:0/16:0)	TAG(16:0/16:0/16:0)	C51H98O6	824.768	36.28	TAG	Glycerolipids [GL]	1.4	0.87	0.004	14200	14700	19200	17100
TAG(16:0/14:0/20:5)	TAG(16:0/14:0/20:5)	C53H92O6	825.702	33.91	TAG	Glycerolipids [GL]	4.3	0.97	0.002	1940	1890	1790	1610
TAG(16:0/14:0/16:1)	TAG(16:0/14:0/16:1)	C49H92O6	794.72	29.68	TAG	Glycerolipids [GL]	2.7	0.56	0.002	15700	14900	14000	14700
TAG(16:0/14:0/16:1)	TAG(16:0/14:0/16:1)	C49H92O6	794.722	33.44	TAG	Glycerolipids [GL]	0.5	0.53	0.002	25500	25600	25900	25500
TAG(16:0/14:0/16:0)	TAG(16:0/14:0/16:0)	C49H94O6	796.735	34.5	TAG	Glycerolipids [GL]	1.8	0.92	0.002	13000	12200	15000	13800
TAG(16:0/14:0/14:0)	TAG(16:0/14:0/14:0)	C47H90O6	768.704	32.88	TAG	Glycerolipids [GL]	3.1	0.85	0.002	8550	9220	9500	8690
TAG(15:0/16:0/16:1)	TAG(15:0/16:0/16:1)	C50H94O6	808.737	34.17	TAG	Glycerolipids [GL]	0.1	0.78	0.002	22000	22200	22600	21400
TAG(15:0/14:0/16:1)	TAG(15:0/14:0/16:1)	C48H90O6	780.704	32.65	TAG	Glycerolipids [GL]	2.8	0.76	0.002	13600	13900	13700	12500
TAG(14:0/14:0/20:4)	TAG(14:0/14:0/20:4)	C51H90O6	799.675	33.44	TAG	Glycerolipids [GL]	5	0.97	0.002	1590	1600	1670	1550
Tetracosanoic acid	Tetracosanoic acid	C24H48O2	386.398	26.35	FA	Fatty Acyls [FA]	2.9	0.43	0.006	2790	2580	2550	2230
TAG 66:17	TAG 66:17	C69H100O6	1042.79	26.08	TAG	Glycerolipids [GL]	2	0.94	0.258	770	806	746	680
TAG 66:14	TAG 66:14	C69H106O6	1048.84	26.24	TAG	Glycerolipids [GL]	0.8	0.96	0.216	533	586	496	534
TAG 65:5	TAG 65:5	C68H122O6	1052.97	24.81	TAG	Glycerolipids [GL]	5.9	0.96	0.25	1230	1030	1250	1100
TAG 62:6	TAG 62:6	C65H114O6	1008.89	25.35	TAG	Glycerolipids [GL]	4.6	0	1	787	896	577	521
TAG 60:5	TAG 60:5	C63H112O6	982.874	41.41	TAG	Glycerolipids [GL]	3.8	0.7	0.106	598	571	715	604
TAG 60:12	TAG 60:12	C63H98O6	968.765	34.89	TAG	Glycerolipids [GL]	3.4	0.8	0.092	487	456	476	395
TAG 60:11	TAG 60:11	C63H100O6	970.781	35.33	TAG	Glycerolipids [GL]	3.2	0.82	0.058	1700	1670	1640	1500
TAG 59:9	TAG 59:9	C62H102O6	960.792	36.22	TAG	Glycerolipids [GL]	0.3	0.07	0.638	6560	6400	6680	6310
TAG 59:12	TAG 59:12	C62H96O6	954.754	34.3	TAG	Glycerolipids [GL]	1.4	0.08	0.652	8080	7660	8070	7030
TAG 58:9	TAG 58:9	C61H100O6	946.781	35.37	TAG	Glycerolipids [GL]	3.1	0.8	0.05	2790	2730	2750	2390
TAG 58:9	TAG 58:9	C61H100O6	929.763	36.5	TAG	Glycerolipids [GL]	0.1	0.75	0.148	1130	1060	1170	1090
TAG 57:7	TAG 57:7	C60H102O6	936.796	36.1	TAG	Glycerolipids [GL]	4.8	0.99	0.034	1090	1050	953	1020
TAG 55:8	TAG 55:8	C58H96O6	906.755	43.53	TAG	Glycerolipids [GL]	0.7	0.57	0.396	2640	2650	3020	2390
TAG 55:7	TAG 55:7	C58H98O6	908.762	23.78	TAG	Glycerolipids [GL]	7.1	0.58	0.148	1120	1150	937	883
TAG 55:6	TAG 55:6	C58H100O6	910.781	35.6	TAG	Glycerolipids [GL]	3.4	0.97	0.04	1690	1670	1590	1370
TAG 55:5	TAG 55:5	C58H102O6	912.796	36.81	TAG	Glycerolipids [GL]	4.3	0.97	0.044	1940	1890	1940	1740
TAG 55:4	TAG 55:4	C58H104O6	914.812	37.65	TAG	Glycerolipids [GL]	3.6	0.95	0.034	1990	2050	2050	1880
TAG 52:6	TAG 52:6	C55H94O6	868.735	33.83	TAG	Glycerolipids [GL]	2.9	0.95	0.22	1860	1930	2100	1960
TAG 51:7	TAG 51:7	C54H90O6	852.704	26.87	TAG	Glycerolipids [GL]	1.1	0.58	0.178	3100	3110	3440	2800
TAG 47:3	TAG 47:3	C50H90O6	804.703	32.31	TAG	Glycerolipids [GL]	4.2	0.77	0.05	2630	2580	2730	2520
TAG 46:3	TAG 46:3	C49H88O6	790.686	31.64	TAG	Glycerolipids [GL]	5.6	0.92	0.038	2530	2690	2580	2360
TAG 44:3	TAG 44:3	C47H84O6	762.661	30.37	TAG	Glycerolipids [GL]	0.5	0.75	0.044	739	657	793	537
TAG 44:2	TAG 44:2	C47H86O6	764.673	31.13	TAG	Glycerolipids [GL]	2.9	0.66	0.034	4780	5040	4910	4310
TAG 43:2	TAG 43:2	C46H84O6	750.659	30.49	TAG	Glycerolipids [GL]	1.3	0.87	0.036	1980	1940	1950	1810
TAG 43:1	TAG 43:1	C46H86O6	752.674	31.2	TAG	Glycerolipids [GL]	2.1	0.96	0.05	5480	5850	5790	5090
TAG 40:1	TAG 40:1	C43H80O6	710.633	29.55	TAG	Glycerolipids [GL]	4.9	0.95	0.062	2020	2010	2210	2010
TAG 36:0	TAG 36:0	C39H74O6	656.584	28.24	TAG	Glycerolipids [GL]	0.2	1	0.148	3800	3650	3930	3680
SQDG 32:1	SQDG 32:1	C41H76O12S	810.548	19.73	SQDG	Glycerolipids [GL]	6.7	0.04	0.912	16400	16800	13600	13400
Sphinganine	Sphinganine	C18H39NO2	302.305	23.38		Sphingolipids [SP]	0	0.11	0.014	1130	1040	1140	1360
SM d42:2	SM d42:2	C47H93N2O6P	813.683	25.81	SM	Sphingolipids [SP]	0.7	1	0.124	45100	49800	48200	38000
SM d42:1	SM d42:1	C47H95N2O6P	815.696	26.51	SM	Sphingolipids [SP]	1.9	1	0.14	20100	20600	22600	18900
SM d40:1	SM d40:1	C45H91N2O6P	787.664	25.79	SM	Sphingolipids [SP]	4.4	0.98	0.302	7120	7320	6870	6040
SM d36:1	SM d36:1	C41H83N2O6P	731.602	24.26	SM	Sphingolipids [SP]	4.8	0.98	0.16	7240	7190	6850	6650
SM d35:3	SM d35:3	C40H77N2O6P	730.59	25.71	SM	Sphingolipids [SP]	4.4	0.98	0.3	2710	2860	2700	2290
SM d34:2	SM d34:2	C39H77N2O6P	701.554	23.23	SM	Sphingolipids [SP]	6.9	0.98	0.138	5070	5070	3990	3690
SM d34:1	SM d34:1	C39H79N2O6P	703.575	23.64	SM	Sphingolipids [SP]	0.2	0.98	0.176	84300	94000	96800	93200
SM d34:0	SM d34:0	C39H81N2O6P	705.587	23.84	SM	Sphingolipids [SP]	2.9	0.98	0.138	35400	40900	37300	38800
SM d33:1	SM d33:1	C38H77N2O6P	689.555	23.35	SM	Sphingolipids [SP]	6.1	0.98	0.3	4170	4350	3940	3770
SM d32:0	SM d32:0	C37H77N2O6P	694.571	24.83	SM	Sphingolipids [SP]	2.9	0.98	0.316	3000	3430	2410	2030
SM d31:3	SM d31:3	C37H69O7P	657.494	20.86	SM	Glycerophospholipids [GP]	5.7	0	1	10100	15100	1690	1550
SHexCer d42:1	SHexCer d42:1	C48H93NO11S	892.652	20.49	HexCER	Sphingolipids [SP]	1.4	0.46	0.416	7180	6980	5810	5680
SHexCer d40:1	SHexCer d40:1	C46H89NO11S	864.623	19.55	HexCER	Sphingolipids [SP]	1.1	0.56	0.124	96400	95000	286000	250000
S4:18(P3:16/F1:2)	S4:18(P3:16/F1:2)	C29H48O15	637.304	21.35		-	3.5	0.1	0.33	1330	1220	1360	1290
S4:18(P3:16/F1:2)	S4:18(P3:16/F1:2)	C29H48O15	654.332	21.05		-	0.2	0.1	0.334	5310	5160	5980	5340
Pterosin G	Pterosin G	C14H18O3	252.16	20.12	FA	Fatty Acyls [FA]	1.9	0.94	0.074	801	771	645	588
PS 47:5	PS 47:5	C53H94NO10P	936.676	20.44	PS	Glycerophospholipids [GP]	6.1	0.2	0.296	4820	4640	3510	3300
PS 46:5	PS 46:5	C52H92NO10P	922.661	20.13	PS	Glycerophospholipids [GP]	6.9	0.2	0.292	2000	1980	1960	1900
PS 43:6	PS 43:6	C49H84NO10P	878.594	19.47	PS	Glycerophospholipids [GP]	0.9	0.2	0.312	13300	11800	24300	20700
PS 35:1	PS 35:1	C41H78NO10P	776.542	26.07	PS	Glycerophospholipids [GP]	0.3	0.98	0.144	1450	1980	2310	1690
PS 31:0	PS 31:0	C37H72NO10P	722.499	19.84	PS	Glycerophospholipids [GP]	1	0.2	0.302	26200	28000	18200	18700
PS 27:0	PS 27:0	C33H64NO10P	666.43	22.01	PS	Glycerophospholipids [GP]	5.4	0.98	0.144	1380	1400	1060	898
PS 20:0	PS 20:0	C26H50NO10P	568.328	17.49	PS	Glycerophospholipids [GP]	4.9	0.69	0.254	17200	17300	14400	14300
Pristanic acid	Pristanic acid	C19H38O2	316.319	24.09	FA	Fatty Acyls [FA]	3	0.18	0.274	1510	1690	1600	1510
PMeOH 34:6	PMeOH 34:6	C38H63O8P	679.43	28.57	PMeOH	Glycerophospholipids [GP]	3.3	0.12	0.258	63300	66900	75200	65000
PMeOH 34:6	PMeOH 34:6	C38H63O8P	696.454	28.58	PMeOH	Glycerophospholipids [GP]	6.4	0.13	0.32	7220	6990	7380	6990
Piperonyl butoxide	Piperonyl butoxide	C19H30O5	339.216	19.55		Sterol Lipids [ST]	0.6	0.08	0.57	5880	5440	2820	3050
Piperonyl butoxide	Piperonyl butoxide	C19H30O5	356.242	19.67		Sterol Lipids [ST]	3.5	0.08	0.602	2740	3260	2100	1890
PI(18:1/20:4)	PI(18:1/20:4)	C47H81O13P	902.572	23.24	PI	Glycerophospholipids [GP]	3.3	0.74	0.002	3750	3590	3520	2850
PI(18:1/20:3)	PI(18:1/20:3)	C47H83O13P	904.588	23.65	PI	Glycerophospholipids [GP]	2.6	0.67	0.002	18300	17800	16700	15600
PI(18:1/20:3)	PI(18:1/20:3)	C47H83O13P	887.567	23.68	PI	Glycerophospholipids [GP]	0.3	0.71	0.002	3030	2940	2900	2620
PI(16:0/20:3)	PI(16:0/20:3)	C45H81O13P	878.577	22.18	PI	Glycerophospholipids [GP]	0.7	0.31	0.13	5440	5070	6170	5580
PI(16:0/18:1)	PI(16:0/18:1)	C43H81O13P	837.548	23.4	PI	Glycerophospholipids [GP]	0.8	0.68	0.002	1080	997	982	899
PG(18:0/18:1(9Z))	PG(18:0/18:1(9Z))	C42H81O10P	794.591	24.8	PG	Glycerophospholipids [GP]	0.1	0.46	0.046	25200	23600	20100	19500
PG(16:1(9Z)/16:1(9Z))	PG(16:1(9Z)/16:1(9Z))	C38H71O10P	736.514	19.8	PG	Glycerophospholipids [GP]	4.3	0.4	0.114	4800	5060	3690	3540
PG(16:0/18:0)	PG(16:0/18:0)	C40H79O10P	751.545	24.71	PG	Glycerophospholipids [GP]	4.8	0.59	0.008	7520	7740	6950	6340
PG 25:0	PG 25:0	C31H61O10P	642.429	21.76	PG	Glycerophospholipids [GP]	5.9	1	0.206	1280	1460	962	1060
PEtOH 46:2	PEtOH 46:2	C51H97O8P	869.696	35.47	PEtOH	Glycerophospholipids [GP]	2.1	0.12	0.302	1060	962	1060	1020
PEtOH 46:1	PEtOH 46:1	C51H99O8P	871.711	36.75	PEtOH	Glycerophospholipids [GP]	3.5	0.12	0.306	788	744	971	872
PEtOH 38:6	PEtOH 38:6	C43H73O8P	766.545	24.35	PEtOH	Glycerophospholipids [GP]	8.5	0.99	0.002	16200	16800	14400	12800
PEtOH 33:0	PEtOH 33:0	C38H75O8P	691.522	19.76	PEtOH	Glycerophospholipids [GP]	5.5	0.12	0.242	12100	12000	8920	8430
PE(18:2(9Z,12Z)/18:2(9Z,12Z))	PE(18:2(9Z,12Z)/18:2(9Z,12Z))	C41H74NO8P	740.529	24.18	PE	Glycerophospholipids [GP]	6.5	0.76	0.006	4060	3800	3400	3740
PE(16:0/16:0)	PE(16:0/16:0)	C37H74NO8P	692.54	25.03	PE	Glycerophospholipids [GP]	6.3	0.99	0.004	2650	2520	2560	2450
PE 40:8e	PE 40:8e	C45H76NO7P	774.54	25.25	PE	Glycerophospholipids [GP]	3	0.49	0.47	1120	1440	654	782
PE 40:8e	PE 40:8e	C45H76NO7P	774.549	20.02	PE	Glycerophospholipids [GP]	1.4	0.08	0.934	5400	5610	4310	4870
PE 40:8	PE 40:8	C45H74NO8P	788.525	24.33	PE	Glycerophospholipids [GP]	2.5	0.88	0.206	1700	1720	1340	1210
PE 40:6e	PE 40:6e	C45H80NO7P	778.573	25.4	PE	Glycerophospholipids [GP]	0.9	0.91	0.058	8740	8330	7920	6950
PE 40:5e	PE 40:5e	C45H82NO7P	780.586	25.78	PE	Glycerophospholipids [GP]	4.9	0.87	0.064	5190	5110	4800	4200
PE 38:6e	PE 38:6e	C43H76NO7P	750.532	25.41	PE	Glycerophospholipids [GP]	0.4	0.85	0.02	17700	17200	16000	14700
PE 38:5e	PE 38:5e	C43H78NO7P	752.558	25.24	PE	Glycerophospholipids [GP]	1	0.84	0.112	19800	18800	17300	15700
PE 37:5e	PE 37:5e	C42H76NO7P	738.546	24.91	PE	Glycerophospholipids [GP]	1.7	0.84	0.068	3080	2990	2690	2420
PE 36:5e	PE 36:5e	C41H74NO7P	724.526	24.6	PE	Glycerophospholipids [GP]	0.3	0.84	0.11	16800	16900	15000	13500
PE 36:0e	PE 36:0e	C41H84NO7P	751.633	40.4	PE	Glycerophospholipids [GP]	0	0.84	0.11	686	627	671	647
PE 34:2e	PE 34:2e	C39H76NO7P	702.549	25.01	PE	Glycerophospholipids [GP]	5.5	0.85	0.096	4260	4410	4500	3630
PE 34:0e	PE 34:0e	C39H80NO7P	723.601	38.08	PE	Glycerophospholipids [GP]	0.3	0.84	0.116	831	801	762	669
PE 25:0	PE 25:0	C30H60NO8P	594.414	22.33	PE	Glycerophospholipids [GP]	1.4	1	0.216	16800	16800	13600	12100
PE 24:6e	PE 24:6e	C29H48NO7P	554.325	18.82	PE	Glycerophospholipids [GP]	6.9	0.21	0.732	7140	9150	5060	4340
PE 24:1	PE 24:1	C29H56NO8P	595.409	19.26	PE	Glycerophospholipids [GP]	0	1	0.21	19500	20600	14100	15400
PE 20:3e	PE 20:3e	C25H46NO7P	521.337	19.33	PE	Glycerophospholipids [GP]	0.1	0.19	0.8	8140	7860	4720	3880
PC(P-18:0/18:1(9Z))	PC(P-18:0/18:1(9Z))	C44H86NO7P	772.617	25.1	PC	Glycerophospholipids [GP]	2.9	0.9	0.01	20700	21700	21900	18300
PC(18:1(9Z)/18:1(9Z))	PC(18:1(9Z)/18:1(9Z))	C44H84NO8P	786.601	24.6	PC	Glycerophospholipids [GP]	0.2	0.95	0.002	150000	157000	146000	126000
PC(17:0/17:0)	PC(17:0/17:0)	C42H84NO8P	762.595	24.99	PC	Glycerophospholipids [GP]	6	1	0.012	97700	97200	105000	95500
PC(16:0/18:1(9Z))	PC(16:0/18:1(9Z))	C42H82NO8P	760.586	24.41	PC	Glycerophospholipids [GP]	1	0.99	0.004	418000	412000	434000	415000
PC(14:0/18:0)	PC(14:0/18:0)	C40H80NO8P	734.57	24.26	PC	Glycerophospholipids [GP]	0.1	0.95	0.002	146000	142000	167000	162000
PC 48:0	PC 48:0	C56H112NO8P	958.816	38.54	PC	Glycerophospholipids [GP]	3.3	0.29	0.498	1390	1540	1460	1310
PC 44:3	PC 44:3	C52H98NO8P	896.715	23.82	PC	Glycerophospholipids [GP]	1.8	0.35	0.172	1290	1240	1660	1480
PC 44:2	PC 44:2	C52H100NO8P	898.728	27.85	PC	Glycerophospholipids [GP]	1	0.59	0.126	895	909	965	834
PC 43:6	PC 43:6	C51H90NO8P	876.645	21.09	PC	Glycerophospholipids [GP]	0.4	0.29	0.174	1400	1360	1180	1100
PC 42:7	PC 42:7	C50H86NO8P	860.615	24.72	PC	Glycerophospholipids [GP]	0.3	0.82	0.062	1470	1200	1220	1040
PC 42:6	PC 42:6	C50H88NO8P	862.639	24.94	PC	Glycerophospholipids [GP]	4.1	0.87	0.054	2860	2650	2810	2820
PC 42:4	PC 42:4	C50H92NO8P	866.662	25.75	PC	Glycerophospholipids [GP]	1.4	0.77	0.182	1760	1820	1740	1600
PC 42:2	PC 42:2	C50H96NO8P	870.695	26.84	PC	Glycerophospholipids [GP]	0.5	0.95	0.148	1710	1570	1880	1560
PC 42:1	PC 42:1	C50H98NO8P	872.707	27.72	PC	Glycerophospholipids [GP]	2.8	0.95	0.138	1240	1190	1430	1190
PC 41:7	PC 41:7	C49H84NO8P	863.625	23.5	PC	Glycerophospholipids [GP]	4.7	0.95	0.15	1740	1730	1790	1580
PC 40:9	PC 40:9	C48H78NO8P	828.55	22.4	PC	Glycerophospholipids [GP]	1.1	0.95	0.118	1950	1750	1630	1420
PC 40:7	PC 40:7	C48H82NO8P	832.581	24.11	PC	Glycerophospholipids [GP]	3.5	0.95	0.018	5510	5280	3510	3270
PC 40:6	PC 40:6	C48H84NO8P	834.597	24.52	PC	Glycerophospholipids [GP]	4	0.96	0.022	13300	12800	10700	10500
PC 40:5e	PC 40:5e	C48H88NO7P	822.633	25.35	PC	Glycerophospholipids [GP]	3.2	0.94	0.14	7150	7250	7060	6150
PC 40:5	PC 40:5	C48H86NO8P	836.613	24.81	PC	Glycerophospholipids [GP]	2.1	0.93	0.018	18200	17100	15500	15000
PC 40:4	PC 40:4	C48H88NO8P	838.626	25.15	PC	Glycerophospholipids [GP]	5.8	0.9	0.024	10200	9570	10100	8710
PC 40:2e	PC 40:2e	C48H94NO7P	828.674	26.45	PC	Glycerophospholipids [GP]	6	0.88	0.152	2120	2230	2550	1910
PC 40:1	PC 40:1	C48H94NO8P	844.679	26.71	PC	Glycerophospholipids [GP]	0.1	0.95	0.06	1640	1740	1810	1610
PC 39:7	PC 39:7	C47H80NO8P	818.588	20.34	PC	Glycerophospholipids [GP]	7.2	0.29	0.25	3040	3170	3020	2920
PC 38:6	PC 38:6	C46H80NO8P	806.565	23.19	PC	Glycerophospholipids [GP]	6.3	0.95	0.154	16300	16000	12800	11300
PC 38:5	PC 38:5	C46H82NO8P	808.584	24.18	PC	Glycerophospholipids [GP]	0.8	0.98	0.016	47600	45900	31400	30200
PC 38:4e	PC 38:4e	C46H86NO7P	796.615	25.22	PC	Glycerophospholipids [GP]	6.2	0.98	0.152	24100	21100	22200	19100
PC 38:4	PC 38:4	C46H84NO8P	810.6	24.72	PC	Glycerophospholipids [GP]	0.5	0.98	0.018	54300	50900	45500	43900
PC 38:3	PC 38:3	C46H86NO8P	812.616	24.89	PC	Glycerophospholipids [GP]	0	0.96	0.026	28800	28500	28600	25300
PC 37:2	PC 37:2	C45H86NO8P	800.614	24.91	PC	Glycerophospholipids [GP]	0.7	0.99	0.024	6680	6310	6260	5610
PC 36:5	PC 36:5	C44H78NO8P	780.55	23.74	PC	Glycerophospholipids [GP]	3.8	0.99	0.026	10100	9890	6970	6630
PC 36:3	PC 36:3	C44H82NO8P	784.583	24.17	PC	Glycerophospholipids [GP]	2.2	0.99	0.026	49500	43100	35600	33600
PC 36:1e	PC 36:1e	C44H88NO7P	774.634	25.72	PC	Glycerophospholipids [GP]	3.7	0.99	0.13	13600	14800	12800	11400
PC 35:6	PC 35:6	C43H74NO8P	764.527	24.06	PC	Glycerophospholipids [GP]	5.9	0.95	0.054	2940	2980	2410	2250
PC 35:2	PC 35:2	C43H82NO8P	772.582	24.22	PC	Glycerophospholipids [GP]	2.9	0.99	0.024	11500	11100	8680	8420
PC 35:1	PC 35:1	C43H84NO8P	774.599	24.74	PC	Glycerophospholipids [GP]	0.5	0.99	0.024	32300	30700	32700	31400
PC 34:4	PC 34:4	C42H76NO8P	754.535	23.81	PC	Glycerophospholipids [GP]	0.9	1	0.028	4900	5090	4100	3720
PC 34:3	PC 34:3	C42H78NO8P	756.55	23.96	PC	Glycerophospholipids [GP]	3.3	0.99	0.032	11900	11300	9660	9370
PC 34:2	PC 34:2	C42H80NO8P	758.569	24.01	PC	Glycerophospholipids [GP]	0	0.99	0.014	86300	102000	79000	70400
PC 34:1e	PC 34:1e	C42H84NO7P	746.601	24.93	PC	Glycerophospholipids [GP]	5.1	1	0.14	135000	143000	156000	120000
PC 34:0e	PC 34:0e	C42H86NO7P	748.619	25.52	PC	Glycerophospholipids [GP]	3.3	1	0.146	32300	31300	33000	23700
PC 33:1	PC 33:1	C41H80NO8P	746.569	24.03	PC	Glycerophospholipids [GP]	0.2	0.99	0.022	34000	34100	32500	26700
PC 32:2	PC 32:2	C40H76NO8P	730.544	23.53	PC	Glycerophospholipids [GP]	3.7	0.99	0.016	9380	9280	7560	6960
PC 32:1	PC 32:1	C40H78NO8P	732.554	23.84	PC	Glycerophospholipids [GP]	0.1	0.99	0.02	159000	165000	148000	136000
PC 32:1	PC 32:1	C40H78NO8P	749.579	24.53	PC	Glycerophospholipids [GP]	0.3	0.95	0.136	5140	5510	6320	6160
PC 32:0e	PC 32:0e	C40H82NO7P	720.59	24.76	PC	Glycerophospholipids [GP]	0.9	1	0.134	60400	60900	71400	61500
PC 31:2e	PC 31:2e	C39H76NO7P	719.57	36.1	PC	Glycerophospholipids [GP]	0.4	0.98	0.302	2250	2040	2400	2250
PC 31:1e	PC 31:1e	C39H78NO7P	721.587	36.91	PC	Glycerophospholipids [GP]	0.3	0.98	0.316	2690	2660	2770	2540
PC 31:1	PC 31:1	C39H76NO8P	718.55	23.96	PC	Glycerophospholipids [GP]	1.9	0.99	0.018	4080	3970	3300	3240
PC 31:0	PC 31:0	C39H78NO8P	720.553	23.89	PC	Glycerophospholipids [GP]	0.2	0.99	0.024	24900	27000	28700	28100
PC 28:1	PC 28:1	C36H70NO8P	693.517	23.31	PC	Glycerophospholipids [GP]	0.5	0.99	0.028	2120	2220	2090	2130
PC 28:0	PC 28:0	C36H72NO8P	678.508	23.07	PC	Glycerophospholipids [GP]	0.9	0.98	0.022	5170	4880	4580	4360
PC 25:2	PC 25:2	C33H62NO8P	632.434	24.11	PC	Glycerophospholipids [GP]	0.3	0.95	0.196	1860	1790	2180	1860
PC 25:1	PC 25:1	C33H64NO8P	634.448	19.97	PC	Glycerophospholipids [GP]	5.1	0.38	0.18	17400	18600	19600	19700
PC 25:0	PC 25:0	C33H66NO8P	636.461	22.21	PC	Glycerophospholipids [GP]	0.2	0.96	0.014	96700	96500	68800	62300
PC 14:0	PC 14:0	C22H44NO8P	482.273	16.78	PC	Glycerophospholipids [GP]	0.4	0.95	0.162	8300	8170	5560	5160
PC 13:0	PC 13:0	C21H42NO8P	485.295	21.09	PC	Glycerophospholipids [GP]	0.8	0.95	0.14	2480	2450	2500	2590
Papaveraldine	Papaveraldine	C30H50O2	460.412	23.13	FA	Fatty Acyls [FA]	4.5	0.15	0.252	9060	8460	9270	8820
Palmitic acid	Palmitic acid	C16H32O2	257.248	26.3	FA	Fatty Acyls [FA]	0.2	0.43	0.004	1920	1910	1870	1690
Palmitic acid	Palmitic acid	C16H32O2	257.247	24.06	FA	Fatty Acyls [FA]	0.9	0.43	0.006	1710	1830	1760	1740
Palmitic acid	Palmitic acid	C16H32O2	274.274	22.35	FA	Fatty Acyls [FA]	1	0.43	0.008	1210	654	1340	1100
Palmitaldehyde	Palmitaldehyde	C16H32O	241.253	26.88	FA	Fatty Acyls [FA]	1.8	0.68	0.008	89.4	81.5	57.4	57.4
Oleic acid	Oleic acid	C18H34O2	300.288	22.56	FA	Fatty Acyls [FA]	3.9	0.48	0.002	1440	1280	1570	1170
Octacosanoic acid	Octacosanoic acid	C28H56O2	442.459	28.25	FA	Fatty Acyls [FA]	5.2	0	1	2580	2620	2590	2340
Nonacosanoic acid	Nonacosanoic acid	C29H58O2	456.475	28.73	FA	Fatty Acyls [FA]	4.2	0.81	0.03	2270	2230	2200	1920
Nonacosanoic acid	Nonacosanoic acid	C29H58O2	439.448	28.74	FA	Fatty Acyls [FA]	6.8	0.19	0.176	2050	1940	1940	1680
Myristoyl Ethanolamide	Myristoyl Ethanolamide	C16H33NO2	272.258	18.73	FA	Fatty Acyls [FA]	1	0.22	0.044	353	320	267	256
MGDG 36:7	MGDG 36:7	C45H72O10	790.549	19.59	MGDG	Glycerolipids [GL]	1.9	0.12	0.85	30800	29000	35000	33100
MGDG 34:4	MGDG 34:4	C43H74O10	768.562	24.82	MGDG	Glycerolipids [GL]	0	0.73	0.11	55100	51600	47900	42700
MGDG 32:2	MGDG 32:2	C41H74O10	744.567	24.7	MGDG	Glycerolipids [GL]	5.9	0.43	0.586	28600	30500	29400	24200
Melissic acid A	Melissic acid A	C30H60O2	453.464	29.42	FA	Fatty Acyls [FA]	5.4	0.89	0.02	3120	3230	3380	2820
Melissic acid A	Melissic acid A	C30H60O2	470.491	29.41	FA	Fatty Acyls [FA]	3.7	0.22	0.49	4160	3870	4100	3620
Mangiferin	Mangiferin	C27H42O4	448.345	21.29		Sterol Lipids [ST]	1.3	0.12	0.2	4690	4430	6860	4780
MAG 22:5	MAG 22:5	C25H40O4	405.302	22.94	MAG	Glycerolipids [GL]	4	0.99	0.31	6230	5470	5700	5320
MAG 22:1	MAG 22:1	C25H48O4	430.386	20.96	MAG	Glycerolipids [GL]	4.8	0.99	0.298	8130	9770	9300	10800
MAG 22:1	MAG 22:1	C25H48O4	413.366	23.63	MAG	Glycerolipids [GL]	6.5	0.1	0.658	6960	6270	6990	6770
MAG 21:1	MAG 21:1	C24H46O4	399.348	23.32	MAG	Glycerolipids [GL]	0.8	0.99	0.336	7960	7480	7710	7630
MAG 21:1	MAG 21:1	C24H46O4	416.37	20.59	MAG	Glycerolipids [GL]	5.5	0.1	0.654	433	434	597	599
MAG 20:1	MAG 20:1	C23H44O4	402.355	20.35	MAG	Glycerolipids [GL]	4.3	0.1	0.664	1790	1740	2940	2860
MAG 19:1	MAG 19:1	C22H42O4	388.355	23.39	MAG	Glycerolipids [GL]	1.1	1	0.326	27800	25700	16000	13300
MAG 19:1	MAG 19:1	C22H42O4	371.317	22.72	MAG	Glycerolipids [GL]	3.5	1	0.328	41900	43900	25300	23100
MAG 18:3	MAG 18:3	C21H36O4	370.309	21.31	MAG	Glycerolipids [GL]	1	1	0.34	3300	3100	3260	3330
MAG 17:2	MAG 17:2	C20H36O4	341.275	21.12	MAG	Glycerolipids [GL]	5.6	0	1	6970	6950	4240	4310
MAG 17:0	MAG 17:0	C20H40O4	345.302	22.02	MAG	Glycerolipids [GL]	7.1	0.1	0.672	2940	2960	2810	2650
MAG 16:1	MAG 16:1	C19H36O4	329.276	21.37	MAG	Glycerolipids [GL]	4.4	0.05	1	2750	2670	2570	2390
MAG 16:0	MAG 16:0	C19H38O4	331.284	21.57	MAG	Glycerolipids [GL]	0.1	0	1	7830	8260	8310	7460
Lyso-PC 18:1(9Z)	Lyso-PC 18:1(9Z)	C44H86NO8P	788.617	25.13	LPC	Glycerophospholipids [GP]	0	0.72	0.002	158000	149000	176000	152000
Lyso-PC 18:0	Lyso-PC 18:0	C44H80NO8P	782.568	24.08	LPC	Glycerophospholipids [GP]	1.6	0.82	0.004	48100	47200	39200	38700
LPC 22:2	LPC 22:2	C30H58NO7P	576.394	20.52	LPC	Glycerophospholipids [GP]	0.9	0.37	0.43	4310	12600	4560	11300
LPC 14:1	LPC 14:1	C22H44NO7P	483.32	19.33	LPC	Glycerophospholipids [GP]	0.6	0.92	0.172	3330	3330	2860	2440
Linoleic acid	Linoleic acid	C18H32O2	281.249	20.63	FA	Fatty Acyls [FA]	0.2	0.24	0.086	2260	2130	2140	2110
LDGTS 4:0	LDGTS 4:0	C14H27NO6	306.191	18.39	LDGTS	Sterol Lipids [ST]	0.2	0.34	0.542	1940	1970	1180	1140
LDGTS 13:1	LDGTS 13:1	C28H46O4	447.358	23.22	LDGTS	Sterol Lipids [ST]	1.1	0	1	40600	40600	43400	39600
HexCer-NS d42:1	HexCer-NS d42:1	C48H93NO8	812.692	26.75	HexCER	Sphingolipids [SP]	6.8	0.86	0.058	3540	3460	3990	3230
HexCer-NS d38:2	HexCer-NS d38:2	C44H83NO8	754.624	28.69	HexCER	Sphingolipids [SP]	3.1	0.95	0.122	721	677	1110	786
HexCer-NS d30:1	HexCer-NS d30:1	C36H69NO8	644.507	22.73	HexCER	Sphingolipids [SP]	3	0.98	0.004	25000	29900	19600	18300
HexCer-NDS d38:1	HexCer-NDS d38:1	C44H85NO8	756.634	26.56	HexCER	Sphingolipids [SP]	0.1	0.19	0.182	3290	2080	3450	3170
HexCer-NDS d37:1	HexCer-NDS d37:1	C43H83NO8	742.623	26.51	HexCER	Sphingolipids [SP]	4.6	0.95	0.108	2900	2800	2760	2850
Hexacosanoic acid	Hexacosanoic acid	C26H52O2	397.402	27.23	FA	Fatty Acyls [FA]	3.4	0.39	0.412	4520	4460	5110	4510
Hexacosanoic acid	Hexacosanoic acid	C26H52O2	414.43	27.23	FA	Fatty Acyls [FA]	1.4	0.39	0.426	7000	7010	7220	6180
Heneicosanoic acid	Heneicosanoic acid	C21H42O2	327.323	24.61	FA	Fatty Acyls [FA]	7.6	0.22	0.084	1470	1480	1550	1260
Heneicosanoic acid	Heneicosanoic acid	C21H42O2	344.351	24.62	FA	Fatty Acyls [FA]	0.1	0.22	0.11	1250	1170	1340	1190
GM3 d42:2	GM3 d42:2	C65H118N2O21	1280.85	24.6	GM	Sphingolipids [SP]	5.5	0.93	0.002	1340	1110	997	1600
GM3 d42:2	GM3 d42:2	C65H118N2O21	1263.82	24.14	GM	Sphingolipids [SP]	7.2	0.93	0.002	1440	1150	1090	1040
GM3 d42:1	GM3 d42:1	C65H120N2O21	1282.86	24.78	GM	Sphingolipids [SP]	8.3	0.9	0.002	2300	2400	2550	2290
GM3 d38:1	GM3 d38:1	C61H112N2O21	1226.8	23.75	GM	Sphingolipids [SP]	3	0.76	0.04	20500	24000	29700	26300
GM3 d36:0	GM3 d36:0	C59H110N2O21	1200.79	30.69	GM	Sphingolipids [SP]	1	0.63	0.076	1710	1780	2070	1890
GM3 d36:0	GM3 d36:0	C59H110N2O21	1183.77	30.62	GM	Sphingolipids [SP]	5.3	0.14	0.802	255	238	289	271
GM3 d34:1	GM3 d34:1	C57H104N2O21	1153.72	22.53	GM	Sphingolipids [SP]	3.9	0.91	0.002	816	820	729	738
Glycoursodeoxycholic acid	Glycoursodeoxycholic acid	C26H43NO5	450.322	21.16		Sterol Lipids [ST]	1.1	0.18	0.024	20700	21000	21300	20800
GlcCer(d18:1/16:0)	GlcCer(d18:1/16:0)	C40H77NO8	700.571	24.67	Cer	Sphingolipids [SP]	6.3	0.96	0.008	2770	2750	2830	2500
Ginsenoside Rh3	Ginsenoside Rh3	C30H50O4	492.402	22.82		Sterol Lipids [ST]	3.8	0.26	0.448	2490	2610	2570	1990
Geranylcitronellol	Geranylcitronellol	C20H36O	310.31	22.31	FA	Fatty Acyls [FA]	2.2	0.39	0.188	1380	1340	1720	1540
gamma-Dodecalactone	gamma-Dodecalactone	C12H22O2	216.196	15.83	FA	Fatty Acyls [FA]	1	0.48	0.028	270	317	96.8	97.6
Farnesyl acetate	Farnesyl acetate	C17H28O2	265.212	20.81	FA	Fatty Acyls [FA]	3.1	0.34	0.242	4500	4750	4660	3870
Euphol	Euphol	C30H50O	427.39	24.53		Sterol Lipids [ST]	0.2	0.4	0.054	20800	16700	20400	19500
Euphol	Euphol	C30H50O	444.413	24.6		Sterol Lipids [ST]	0.6	0.04	0.294	31300	28500	27300	25200
Elaidic acid	Elaidic acid	C18H34O2	283.262	20.82	FA	Fatty Acyls [FA]	1.8	0.48	0.002	3790	1410	3610	3540
DGTS	DGTS	C42H81NO7	712.6	26.02	DGTS	Glycerolipids [GL]	0.9	0.99	0.208	3660	3620	3780	3590
DGDG 38:6	DGDG 38:6	C53H88O15	982.644	28.09	DGDG	Glycerolipids [GL]	0.3	0.67	0.576	603	505	658	621
DGDG 34:3	DGDG 34:3	C49H86O15	932.639	23.01	DGDG	Glycerolipids [GL]	6.3	0.7	0.376	1050	976	1490	1320
DGDG 34:2	DGDG 34:2	C49H88O15	934.639	23.17	DGDG	Glycerolipids [GL]	6.6	0.06	1	47300	41700	66000	63400
DGDG 27:6	DGDG 27:6	C42H66O15	828.467	18.98	DAG	Glycerolipids [GL]	8.1	0.58	0.564	15800	16200	11900	12100
DG(34:2p)	DG(34:2p)	C37H68O4	577.516	26.6	DAG	Glycerolipids [GL]	4.2	0.6	0.002	4820	4740	5150	4760
DG(32:2p)	DG(32:2p)	C35H64O4	549.495	25.44	DAG	Glycerolipids [GL]	0.5	0.68	0.002	5800	5860	5570	4980
DAG(18:1/18:2)	DAG(18:1/18:2)	C39H70O5	636.556	26.39	DAG	Glycerolipids [GL]	0.1	0.72	0.002	2680	2580	2630	2450
DAG(18:1/18:1)	DAG(18:1/18:1)	C39H72O5	638.57	26.73	DAG	Glycerolipids [GL]	2.1	0.89	0.002	10300	9930	10700	9670
DAG(18:0/20:4)	DAG(18:0/20:4)	C41H72O5	662.581	25.71	DAG	Glycerolipids [GL]	1.6	0.89	0.002	2820	2620	2600	2230
DAG(16:0/20:1)	DAG(16:0/20:1)	C39H74O5	640.582	23.52	DAG	Glycerolipids [GL]	7.9	0.05	0.298	5460	6720	5240	5070
DAG(16:0/16:0)	DAG(16:0/16:0)	C35H68O5	586.539	26.34	DAG	Glycerolipids [GL]	1.6	0.97	0.002	20200	20700	20300	17900
DAG(16:0/16:0)	DAG(16:0/16:0)	C35H68O5	569.512	26.4	DAG	Glycerolipids [GL]	1	0.94	0.002	3160	3030	3250	2900
DAG(16:0/14:0)	DAG(16:0/14:0)	C33H64O5	558.508	25.46	DAG	Glycerolipids [GL]	1.8	0.87	0.002	14600	14800	15500	13500
DAG 52:4	DAG 52:4	C55H100O5	841.762	31.82	DAG	Glycerolipids [GL]	0.9	0.09	0.712	206	267	284	182
DAG 52:2	DAG 52:2	C55H104O5	862.816	40.08	DAG	Glycerolipids [GL]	5.5	0.73	0.034	5430	5090	6340	5150
DAG 52:1	DAG 52:1	C55H106O5	864.831	42	DAG	Glycerolipids [GL]	6.1	0.68	0.386	3540	3400	4590	3530
DAG 50:1	DAG 50:1	C53H102O5	836.799	39.61	DAG	Glycerolipids [GL]	8.2	0.71	0.1	9130	8760	10700	9660
DAG 46:4	DAG 46:4	C49H88O5	757.677	45.81	DAG	Glycerolipids [GL]	4.7	0.68	0.402	416	416	499	417
DAG 45:0	DAG 45:0	C48H94O5	751.715	28.68	DAG	Glycerolipids [GL]	0.1	0.05	0.974	744	669	804	603
DAG 43:6	DAG 43:6	C46H78O5	728.615	26.54	DAG	Glycerolipids [GL]	1.5	0.27	0.572	2470	2300	2420	2200
DAG 42:2	DAG 42:2	C45H84O5	722.663	29.64	DAG	Glycerolipids [GL]	2.2	0.95	0.06	719	742	807	658
DAG 42:2	DAG 42:2	C45H84O5	722.669	22.9	DAG	Glycerolipids [GL]	2.8	0.92	0.18	609	538	781	762
DAG 41:6	DAG 41:6	C44H74O5	700.588	27.32	DAG	Glycerolipids [GL]	0.6	0.08	0.742	7600	7550	7500	7110
DAG 40:1	DAG 40:1	C43H82O5	696.644	24.77	DAG	Glycerolipids [GL]	5.6	0.08	0.656	4100	3960	4260	3260
DAG 39:3	DAG 39:3	C42H76O5	678.605	27.32	DAG	Glycerolipids [GL]	1.6	0.09	0.7	4180	4120	4190	3700
DAG 39:2	DAG 39:2	C42H78O5	680.613	23.01	DAG	Glycerolipids [GL]	5.3	0.71	0.29	2280	2330	2270	2090
DAG 38:5	DAG 38:5	C41H70O5	643.528	26.76	DAG	Glycerolipids [GL]	0.5	0.96	0.1	1910	1980	2080	1700
DAG 38:1	DAG 38:1	C41H78O5	668.615	24.14	DAG	Glycerolipids [GL]	3.8	0.07	0.65	8720	8420	7900	7830
DAG 37:7	DAG 37:7	C40H64O5	642.509	21.17	DAG	Glycerolipids [GL]	0.5	0.37	0.704	3820	3930	3920	3200
DAG 36:7	DAG 36:7	C39H62O5	628.498	20.87	DAG	Glycerolipids [GL]	5.5	0.4	0.642	37300	39500	33800	39500
DAG 36:4	DAG 36:4	C39H68O5	617.51	26.55	DAG	Glycerolipids [GL]	4.8	0.95	0.09	3440	3650	3640	3290
DAG 35:3	DAG 35:3	C38H68O5	605.527	26.03	DAG	Glycerolipids [GL]	1.6	0.68	0.372	2260	2170	2100	2040
DAG 35:2	DAG 35:2	C38H70O5	624.56	26.69	DAG	Glycerolipids [GL]	2.6	0.96	0.056	2990	3000	3080	2840
DAG 34:4	DAG 34:4	C37H64O5	589.482	25.74	DAG	Glycerolipids [GL]	0.7	0.98	0.072	2870	3010	2600	2550
DAG 34:2	DAG 34:2	C37H68O5	610.538	25.97	DAG	Glycerolipids [GL]	2.8	0.96	0.084	9740	9360	9560	7970
DAG 34:1	DAG 34:1	C37H70O5	612.555	26.51	DAG	Glycerolipids [GL]	0.3	0.94	0.05	27700	30000	29200	27700
DAG 33:2	DAG 33:2	C36H66O5	596.526	26.05	DAG	Glycerolipids [GL]	1.9	0.96	0.08	6220	5630	5990	5430
DAG 33:1	DAG 33:1	C36H68O5	598.549	26.77	DAG	Glycerolipids [GL]	4.8	0.9	0.07	11500	11500	11000	9910
DAG 33:0	DAG 33:0	C36H70O5	600.558	27.39	DAG	Glycerolipids [GL]	8.2	0.96	0.078	1090	5380	3950	1990
DAG 32:8	DAG 32:8	C35H52O5	570.419	19.89	DAG	Glycerolipids [GL]	2.9	0.69	0.284	35900	34600	22300	22300
DAG 32:2	DAG 32:2	C35H64O5	582.509	25.31	DAG	Glycerolipids [GL]	0.3	0.92	0.058	15100	14600	15100	14100
DAG 32:1	DAG 32:1	C35H66O5	584.524	25.75	DAG	Glycerolipids [GL]	0.8	0.93	0.076	29200	29900	28200	26300
DAG 31:1	DAG 31:1	C34H64O5	570.509	25.35	DAG	Glycerolipids [GL]	0.2	0.95	0.064	15900	15600	14800	14900
DAG 31:0	DAG 31:0	C34H66O5	572.533	26.21	DAG	Glycerolipids [GL]	3.3	0.96	0.056	14100	15100	13600	12500
DAG 31:0	DAG 31:0	C34H66O5	555.496	25.5	DAG	Glycerolipids [GL]	1.3	0.68	0.202	2480	2500	2260	2210
DAG 30:5	DAG 30:5	C33H54O5	531.408	23.7	DAG	Glycerolipids [GL]	5.7	0.86	0.104	10300	10200	11700	10400
DAG 30:2	DAG 30:2	C33H60O5	554.481	24.62	DAG	Glycerolipids [GL]	4.9	0.97	0.034	3100	3210	3340	3290
DAG 29:1	DAG 29:1	C32H60O5	542.486	25.2	DAG	Glycerolipids [GL]	1.1	0.96	0.086	3540	3570	3700	3570
DAG 29:0	DAG 29:0	C32H62O5	544.491	25.03	DAG	Glycerolipids [GL]	3.6	0.96	0.074	8110	7750	8280	7710
DAG 28:5	DAG 28:5	C31H50O5	503.375	23.01	DAG	Glycerolipids [GL]	0.7	0.27	0.578	1730	1860	1590	1440
DAG 28:1	DAG 28:1	C31H58O5	528.461	24.26	DAG	Glycerolipids [GL]	1.3	0.96	0.05	2480	2280	2240	2360
DAG 28:0	DAG 28:0	C31H60O5	530.491	25.62	DAG	Glycerolipids [GL]	1.3	0.95	0.068	3880	3880	4040	4040
DAG 27:5	DAG 27:5	C30H48O5	506.385	21.13	DAG	Glycerolipids [GL]	0.7	0.68	0.266	7400	7220	7290	7110
DAG 26:4	DAG 26:4	C29H48O5	477.36	20.68	DAG	Glycerolipids [GL]	1.2	0.24	0.798	4510	4510	4290	4040
DAG 26:0	DAG 26:0	C29H56O5	502.458	24.51	DAG	Glycerolipids [GL]	3.4	0.94	0.068	2450	1890	2040	1530
DAG 25:4	DAG 25:4	C28H46O5	463.342	19.5	DAG	Glycerolipids [GL]	0.2	0.68	0.382	179000	202000	116000	81200
DAG 25:2	DAG 25:2	C28H50O5	467.373	19.63	DAG	Glycerolipids [GL]	0.1	0.93	0.082	109000	103000	115000	106000
DAG 24:6	DAG 24:6	C27H40O5	445.287	20.04	DAG	Glycerolipids [GL]	8.2	0.27	0.616	3020	2930	2620	2900
DAG 20:3	DAG 20:3	C24H31N3O	395.281	19.51	DAG	Glycerolipids [GL]	2.9	0	1	2500	2300	1160	709
DAG 20:2	DAG 20:2	C23H40O5	414.319	20.46	DAG	Glycerolipids [GL]	3.7	0.68	0.372	4280	3930	4410	4430
DAG 18:0	DAG 18:0	C21H40O5	390.321	21.78	DAG	Glycerolipids [GL]	0.1	0.92	0.248	2740	3320	2970	3120
D-erythro-Sphingosine C-17	D-erythro-Sphingosine C-17	C17H35NO2	286.274	19.67		Sphingolipids [SP]	0.2	0.39	0.094	16200	15000	5020	4700
Coprostanone	Coprostanone	C27H46O	404.383	24.01		Sterol Lipids [ST]	0.2	0.28	0.002	11800	10800	8980	6010
CL 72:1	CL 72:1	C81H156O17P2	1464.09	24.03	CL	Glycerophospholipids [GP]	1	0.21	0.764	251	254	168	145
CL 68:7	CL 68:7	C77H136O17P2	1412.96	26.07	CL	Glycerophospholipids [GP]	0.3	0.21	0.698	1760	1770	1570	1530
Cis-8,11,14,17-Eicosatetraenoic acid	Cis-8,11,14,17-Eicosatetraenoic acid	C20H32O2	305.248	21.56	FA	Fatty Acyls [FA]	0.3	0.29	0.008	2790	2420	3340	1850
Cholestenone	Cholestenone	C27H44O	402.372	24.11		Sterol Lipids [ST]	1.4	0.34	0.106	4910	4550	5280	4810
ChE(24:4)	ChE(24:4)	C51H84O2	746.675	39.95	ChE	Sterol Lipids [ST]	2	0.8	0.002	5770	5140	5910	5360
ChE(22:6)	ChE(22:6)	C49H76O2	714.619	36.15	ChE	Sterol Lipids [ST]	0	0.86	0.002	36300	37600	43100	38400
ChE(19:0)	ChE(19:0)	C46H82O2	684.665	41.21	ChE	Sterol Lipids [ST]	0	0.78	0.002	13000	12300	26100	20900
ChE(18:1)	ChE(18:1)	C45H78O2	668.634	38.03	ChE	Sterol Lipids [ST]	0.1	0.9	0.002	77700	77200	81600	78000
ChE(16:1)	ChE(16:1)	C43H74O2	640.602	35.95	ChE	Sterol Lipids [ST]	0.6	0.89	0.002	13300	13300	14000	12600
ChE(16:0)	ChE(16:0)	C43H76O2	642.617	37.59	ChE	Sterol Lipids [ST]	0.3	0.83	0.002	14900	15000	18500	15500
Cetyl myristoleate	Cetyl myristoleate	C30H58O2	468.475	28.59	FA	Fatty Acyls [FA]	4.8	0.17	0.122	8620	8230	8370	7120
Cetyl myristoleate	Cetyl myristoleate	C30H58O2	451.449	28.6	FA	Fatty Acyls [FA]	2.9	0.04	0.152	8440	8170	8300	6510
Cer-NS d43:1	Cer-NS d43:1	C43H85NO3	664.661	28.69	CER	Sphingolipids [SP]	0.6	0.99	0.004	253000	246000	303000	276000
Cer-NS d42:2	Cer-NS d42:2	C42H81NO3	648.626	27.28	CER	Sphingolipids [SP]	4.3	0.99	0.004	10100	10600	9880	8710
Cer-NS d42:1	Cer-NS d42:1	C42H83NO3	667.666	28.69	CER	Sphingolipids [SP]	6.9	0.98	0.004	4050	3510	4680	3930
Cer-NS d42:1	Cer-NS d42:1	C42H83NO3	650.642	28.16	CER	Sphingolipids [SP]	3.5	0.99	0.004	8790	7680	7440	7050
Cer-NS d34:1	Cer-NS d34:1	C34H67NO3	538.517	24.76	CER	Sphingolipids [SP]	2.7	0.98	0.002	6810	7600	7460	7190
CE 24:1	CE 24:1	C51H90O2	752.723	45.82	CE	Sterol Lipids [ST]	5.2	0.95	0.006	2640	2930	3680	3060
CE 22:5	CE 22:5	C49H78O2	716.634	36.89	CE	Sterol Lipids [ST]	0.4	0.95	0.002	48500	47900	52800	46100
CE 22:4	CE 22:4	C49H80O2	718.645	37.68	CE	Sterol Lipids [ST]	0.6	0.95	0.004	15400	14600	14900	13900
CE 22:2	CE 22:2	C49H84O2	722.677	41.16	CE	Sterol Lipids [ST]	4.2	0.95	0.01	988	939	1110	947
CE 22:1	CE 22:1	C49H86O2	724.692	42.93	CE	Sterol Lipids [ST]	5.2	0.95	0.006	1550	1460	1840	1570
CE 20:5	CE 20:5	C47H74O2	688.599	35.17	CE	Sterol Lipids [ST]	3.9	0.97	0.006	12500	12200	12400	10900
CE 20:4	CE 20:4	C47H76O2	673.587	38.03	CE	Sterol Lipids [ST]	6.1	0.97	0.008	3970	3940	4380	3970
CE 20:4	CE 20:4	C47H76O2	690.617	36.28	CE	Sterol Lipids [ST]	0.7	0.97	0.01	20100	20000	19200	17500
CE 20:3	CE 20:3	C47H78O2	692.63	37.16	CE	Sterol Lipids [ST]	0	0.95	0.006	12700	12800	13700	11900
CE 20:2	CE 20:2	C47H80O2	694.645	38.49	CE	Sterol Lipids [ST]	2.3	0.96	0.004	3800	3870	4090	3650
CE 20:1	CE 20:1	C47H82O2	696.663	40.35	CE	Sterol Lipids [ST]	2.4	0.95	0.008	3960	3520	4290	3900
CE 18:2	CE 18:2	C45H76O2	666.617	36.65	CE	Sterol Lipids [ST]	1.7	0.96	0.01	10100	10000	11400	9660
CE 18:0	CE 18:0	C45H80O2	670.646	39.93	CE	Sterol Lipids [ST]	2.9	0.96	0.006	1800	1710	2940	2620
CE 17:1	CE 17:1	C44H76O2	654.615	36.93	CE	Sterol Lipids [ST]	3.4	0.98	0.012	3400	3430	4070	3460
CE 17:0	CE 17:0	C44H78O2	656.63	38.31	CE	Sterol Lipids [ST]	5	0.96	0.004	2560	2730	2810	2590
CE 15:0	CE 15:0	C42H74O2	628.599	36.28	CE	Sterol Lipids [ST]	5.3	0.98	0.004	3040	3130	3560	3000
CE 14:0	CE 14:0	C41H72O2	614.584	35.51	CE	Sterol Lipids [ST]	2.7	0.98	0.006	5430	5590	6280	5260
Calcipotriol	Calcipotriol	C27H40O3	413.307	21.97		Sterol Lipids [ST]	1.5	0.64	0.028	4600	1450	1450	1490
C24:1 Lactosyl() Ceramide (d18:1/24:1)	C24:1 Lactosyl() Ceramide (d18:1/24:1)	C54H101NO13	972.732	24.86	CER	Sphingolipids [SP]	1	0.97	0.002	832	530	856	376
C24:1 Galactosyl() Ceramide (d18:1/24:1(15Z))	C24:1 Galactosyl() Ceramide (d18:1/24:1(15Z))	C48H91NO8	810.677	25.99	CER	Sphingolipids [SP]	4.6	0.9	0.002	2830	2970	2990	2660
C2 Ceramide (d17:1/2:0)	C2 Ceramide (d17:1/2:0)	C19H37NO3	345.314	25.39	CER	Fatty Acyls [FA]	8.2	0.04	0.328	880	808	853	805
BMP 43:0	BMP 43:0	C49H97O10P	894.717	26.53	BMP	Glycerophospholipids [GP]	0.5	0.71	0.46	1900	1700	1750	939
BMP 37:1	BMP 37:1	C43H83O10P	791.583	25.01	BMP	Glycerophospholipids [GP]	2.5	0.71	0.484	8840	9190	10000	9080
BMP 27:1	BMP 27:1	C33H63O10P	651.43	21.52	BMP	Glycerophospholipids [GP]	1	0.71	0.47	1280	1590	1550	1250
Behenic acid	Behenic acid	C22H44O2	358.366	25.39	FA	Fatty Acyls [FA]	3.3	0.48	0.004	868	692	770	694
Behenic acid	Behenic acid	C22H44O2	341.338	25.41	FA	Fatty Acyls [FA]	6.5	0.36	0.028	1610	1510	1560	1300
Arachidic acid	Arachidic acid	C20H40O2	330.344	24.51	A	Fatty Acyls [FA]	2.8	0.08	0.044	13900	17300	12400	13600
Arachidic acid	Arachidic acid	C20H40O2	313.312	24.55	FA	Fatty Acyls [FA]	3.5	0.07	0.058	16300	15300	15100	16400
alpha-Tocopherol	alpha-Tocopherol	C29H50O2	431.386	23.46		Sterol Lipids [ST]	5	0	0.398	3420	3410	3410	3040
Allocholic Acid	Allocholic Acid	C24H36O5	405.272	20.31		Sterol Lipids [ST]	0.9	0.08	0.044	5620	5810	6620	6320
Acetyl tributyl citrate	Acetyl tributyl citrate	C20H34O8	403.235	20.48	A	Fatty Acyls [FA]	1.3	0.89	0.004	17300	16700	11000	11200
Acetyl tributyl citrate	Acetyl tributyl citrate	C20H34O8	403.235	17.74	FA	Fatty Acyls [FA]	0	0.22	0.2	6500	6400	5370	5390
Acetyl tributyl citrate	Acetyl tributyl citrate	C20H34O8	420.256	17.6	FA	Fatty Acyls [FA]	6.3	0.61	0.242	27900	28000	22100	22500
9-Octadecenal	9-Octadecenal	C18H34O	267.266	21.56	FA	Fatty Acyls [FA]	7.9	0.01	0.794	300	379	328	365
9-HODE	9-HODE	C18H32O3	297.242	20.84	FA	Fatty Acyls [FA]	0.6	0.16	0.746	3550	4440	3830	3250
8,11,14-Eicosatrienoic acid	8,11,14-Eicosatrienoic acid	C20H34O2	307.261	23.09	FA	Fatty Acyls [FA]	5.4	0.32	0.002	2220	2340	1960	2550
7a-Hydroxy-cholestene-3-one	7a-Hydroxy-cholestene-3-one	C27H44O2	401.345	22.54		Sterol Lipids [ST]	1.9	0.96	0.002	6440	6040	7500	6520
5a-Androstan-3b-ol	5a-Androstan-3b-ol	C19H32O	277.253	24.28		Sterol Lipids [ST]	0.3	0.09	0.408	181	176	418	159
3b-Hydroxy-5-cholenoic acid	3b-Hydroxy-5-cholenoic acid	C24H38O3	375.289	19.71		Sterol Lipids [ST]	0.6	0.64	0.01	43900	40500	8480	8530
3,4-Dimethyl-5-pentyl-2-furannonanoic acid	3,4-Dimethyl-5-pentyl-2-furannonanoic acid	C20H34O3	340.285	21.13	FA	Fatty Acyls [FA]	0.5	0.13	0.54	2000	1810	1820	1580
2(R)-hydroxydocosanoic acid	2(R)-hydroxydocosanoic acid	C22H44O3	374.364	30.31	FA	Fatty Acyls [FA]	2	0.41	0.038	306	292	361	273
2,3-Dinor-TXB2	2,3-Dinor-TXB2	C18H30O6	360.232	17.88	FA	Fatty Acyls [FA]	3.1	0.19	0.234	4970	4740	3520	3540
2-Hydroxyestradiol	2-Hydroxyestradiol	C18H24O3	289.184	23.81		Sterol Lipids [ST]	0.5	0.09	0.116	1020	1000	1000	956
2-Dodecenal	2-Dodecenal	C12H22O	200.201	19.91	FA	Fatty Acyls [FA]	1.4	0.51	0.026	1070	851	444	398
19,28-Epoxy-3-oleananol	19,28-Epoxy-3-oleananol	C30H50O2	443.386	22.41	FA	Fatty Acyls [FA]	5.6	0.72	0.008	10300	9950	10500	9470
17alpha-Methyltestosterone	17alpha-Methyltestosterone	C20H30O2	303.233	21.98		Sterol Lipids [ST]	0.1	0.53	0.002	633	564	485	480
15alpha-hydroxycholestene	15alpha-hydroxycholestene	C27H46O2	420.382	22.66		Sterol Lipids [ST]	4.7	0.79	0.002	1070	919	1070	1030
15-ketocholestane	15-ketocholestane	C27H46O2	403.355	22.57	FA	Fatty Acyls [FA]	0.4	0.59	0.002	2340	2090	2250	1930
14,15-Epoxysclareol	14,15-Epoxysclareol	C20H36O3	342.293	21.2	FA	Fatty Acyls [FA]	1.5	0	1	3390	3170	3280	3120
12-Hydroxydodecanoic acid	12-Hydroxydodecanoic acid	C12H24O3	217.172	19.17	FA	Fatty Acyls [FA]	3.4	0	1	819	806	731	740
11-Oxooctadecanoic acid	11-Oxooctadecanoic acid	C18H34O3	299.265	21.99	FA	Fatty Acyls [FA]	0.4	0.25	0.282	3900	3810	3640	3520
(S)-10,16-Dihydroxyhexadecanoic acid	(S)-10,16-Dihydroxyhexadecanoic acid	C16H32O4	306.263	22.45	FA	Fatty Acyls [FA]	2.7	0.36	0.122	944	1030	779	638
(None,)	-	C98H190O14	1592.43	29.18		(None,)	4.4	-	-	2980	3310	4160	3720
(None,)	-	C105H173O4P	1547.35	31.8		(None,)	6	-	-	254	211	250	232
(None,)	-	C59H79N15O21S6	1526.4	31.84		(None,)	3.3	-	-	2010	2070	2240	1930
(None,)	-	C69H70O39	1523.35	36.31		(None,)	1.5	-	-	358	332	449	389
(None,)	-	C66H75O39	1509.43	38.17		(None,)	2.9	-	-	4500	3770	5820	5060
(None,)	-	C73H119N13O18	1483.93	24.02		(None,)	4.7	-	-	1080	907	833	831
(None,)	-	C92H182O11	1481.39	38.42		(None,)	6.3	-	-	90	124	117	138
(None,)	-	C82H160O17P2	1480.12	24.39		(None,)	1.5	-	-	388	541	371	349
(None,)	-	C82H156O17P2	1476.09	24.77		(None,)	6	-	-	488	411	245	301
(None,)	-	C73H119N13O18	1466.9	24.03		(None,)	1	-	-	154	206	160	154
(None,)	-	C80H152O17P2	1448.06	24.64		(None,)	2.1	-	-	292	372	257	228
(None,)	-	C72H128N2O26	1437.88	47.62		(None,)	0.2	-	-	75.6	77.6	86.8	74.7
(None,)	-	C36H56O46S6	1434.07	24.84		(None,)	1.5	-	-	368	347	328	272
(None,)	-	C76H148O17P2	1413.06	23.6		(None,)	3.7	-	-	138	133	129	141
(None,)	-	C77H140O17P2	1399.97	22.38		(None,)	4.1	-	-	78.7	113	77.6	59.1
(None,)	-	C64H113N3O29	1388.76	19.16		(None,)	1.7	-	-	502	474	346	347
(None,)	-	C66H86N18O15	1388.68	45.35		(None,)	0.4	-	-	101	122	79.3	62.5
(None,)	-	C85H142O7P2	1355.06	24.94		(None,)	0.6	-	-	616	611	421	589
(None,)	-	C60H117NO27P2	1346.73	19.15		(None,)	1.3	-	-	646	704	510	437
(None,)	-	C68H129N2O20P	1342.92	26.07		(None,)	1.1	-	-	350000	346000	400000	362000
(None,)	-	C73H122N3O15P	1312.87	24.12		(None,)	0.8	-	-	313	312	332	303
(None,)	-	C49H64N9O30P	1290.35	41.88		(None,)	8	-	-	86	70.4	117	108
(None,)	-	C80H134O7P2	1287	26.25		(None,)	4.7	-	-	434	494	515	361
(None,)	-	C64H121N3O21	1268.85	24.78		(None,)	1.3	-	-	498	857	419	777
(None,)	-	C60H105N17O12	1256.81	24.29		(None,)	4.8	-	-	1550	1460	1690	1510
(None,)	-	C64H120N2O21	1253.84	30.3		(None,)	7	-	-	144	153	166	167
(None,)	-	C44H67N8O23P3S2	1250.34	40.61		(None,)	6.1	-	-	737	656	965	859
(None,)	-	C54H52N16O16S2	1245.34	32.2		(None,)	6.2	-	-	732	688	875	748
(None,)	-	C44H69N8O22P3S2	1236.36	27.74		(None,)	2.5	-	-	9230	8710	7840	7050
(None,)	-	C63H122O17P2	1213.83	39.41		(None,)	5.2	-	-	857	828	1080	947
(None,)	-	C80H133O4P	1207.03	26.42		(None,)	1	-	-	1000	1050	1010	728
(None,)	-	C55H96N16O13	1206.78	24.15		(None,)	6	-	-	302	275	357	302
(None,)	-	C65H100O19	1202.72	22.53		(None,)	2.4	-	-	377	413	390	370
(None,)	-	C57H82O26	1200.55	32.23		(None,)	3	-	-	175	171	204	164
(None,)	-	C61H115N3O15P2	1192.8	25.38		(None,)	7.9	-	-	4830	4490	9600	8300
(None,)	-	C61H115N3O15P2	1192.79	32.9		(None,)	3.3	-	-	2220	2040	3070	2830
(None,)	-	C55H34O31	1191.11	28.73		(None,)	0.5	-	-	570	589	707	578
(None,)	-	C56H85N17O12	1188.65	19.13		(None,)	7.9	-	-	1930	2150	1470	1280
(None,)	-	C65H108N2O11P2	1172.79	19.35		(None,)	3.8	-	-	99.7	245	1040	890
(None,)	-	C59H111N3O15P2	1164.76	30.16		(None,)	3.1	-	-	358	371	385	340
(None,)	-	C59H88N2O20	1162.64	19.09		(None,)	2	-	-	2140	2340	1630	1620
(None,)	-	C50H60O30	1158.34	31.12		(None,)	5.7	-	-	119	119	131	103
(None,)	-	C53H74N10O14S2	1156.52	19.2		(None,)	2.6	-	-	47.5	110	118	39.2
(None,)	-	C49H62N10O16S3	1143.36	33.29		(None,)	1.9	-	-	332	346	360	301
(None,)	-	C54H90O23	1124.62	19.04		(None,)	3.2	-	-	2650	2630	2040	2050
(None,)	-	C53H76N14O12	1118.62	19.13		(None,)	4.5	-	-	2510	2350	2150	2160
(None,)	-	C41H64N7O21P3S	1116.32	46.78		(None,)	0.2	-	-	158	164	103	82.9
(None,)	-	C52H55O27	1112.31	40.5		(None,)	4.6	-	-	62.4	61	66.9	54.9
(None,)	-	C39H60N7O21P3S	1105.3	36.1		(None,)	6.5	-	-	104	99	140	111
(None,)	-	C52H76O24	1102.51	19.01		(None,)	5.6	-	-	169	140	139	74
(None,)	-	C57H112NO16P	1098.79	26.12		(None,)	1.6	-	-	909	993	1080	998
(None,)	-	C52H88O23	1098.62	19.15		(None,)	1.1	-	-	3480	3310	3180	2720
(None,)	-	C53H78N10O14	1096.6	19		(None,)	0.2	-	-	2980	2990	2230	2410
(None,)	-	C53H86O22	1092.59	18.54		(None,)	3	-	-	2850	3340	2520	405
(None,)	-	C32H57N9O23P4S	1092.23	30.22		(None,)	1.9	-	-	474	420	515	428
(None,)	-	C56H102N2O18	1091.73	30.21		(None,)	3.8	-	-	324	288	399	427
(None,)	-	C60H94O16	1088.68	19.44		(None,)	2.3	-	-	282	414	424	254
(None,)	-	C50H53O26	1087.32	26.42		(None,)	3.8	-	-	12200	11500	8230	8910
(None,)	-	C48H30O30	1087.1	32.04		(None,)	8	-	-	402	385	495	364
(None,)	-	C71H120O6	1086.94	38.03		(None,)	2.4	-	-	266	294	278	280
(None,)	-	C35H59Al3N10O24	1085.32	41.16		(None,)	2.2	-	-	50.5	57.1	64.8	52.1
(None,)	-	C56H75N9O9S2	1082.52	18.62		(None,)	5	-	-	230	596	270	102
(None,)	-	C62H48O17	1082.31	30.21		(None,)	0.6	-	-	87	87.4	103	72.3
(None,)	-	C50H73N15O11	1077.6	33.69		(None,)	0.6	-	-	514	501	364	332
(None,)	-	C53H86O21	1076.59	19.03		(None,)	6.4	-	-	3270	3340	2790	2870
(None,)	-	C71H124O6	1073.94	24.86		(None,)	5.4	-	-	845	902	877	868
(None,)	-	C49H51O26	1073.31	25.02		(None,)	5.2	-	-	24200	25800	30800	26900
(None,)	-	C63H108NO9P	1071.8	39.21		(None,)	4.7	-	-	1280	1250	1150	1050
(None,)	-	C54H80O21	1065.52	19.01		(None,)	1.3	-	-	420	387	212	340
(None,)	-	C47H85O19P3	1064.52	18.09		(None,)	0.4	-	-	178	158	177	67.1
(None,)	-	C48H54O27	1063.29	35.08		(None,)	0.4	-	-	498	528	685	610
(None,)	-	C46H54O28	1055.3	30.23		(None,)	7.2	-	-	43700	46000	50200	42800
(None,)	-	C63H108NO9P	1054.79	51.36		(None,)	3.2	-	-	2100	2160	2090	2110
(None,)	-	C58H80O16	1050.58	18.98		(None,)	0.9	-	-	3930	4160	3400	2960
(None,)	-	C52H81N3O15P2	1050.51	18.43		(None,)	0.1	-	-	508	144	268	134
(None,)	-	C52H81N7O15	1044.58	19.16		(None,)	1.7	-	-	4170	4650	3380	2780
(None,)	-	C45H85O19P3	1040.52	18.61		(None,)	6.2	-	-	328	322	231	262
(None,)	-	C40H48N10Na4O17	1033.29	37.98		(None,)	4.3	-	-	388	368	330	320
(None,)	-	C34H55N7O24P2	1025.31	52.74		(None,)	4.2	-	-	272	283	202	191
(None,)	-	C67H118O5	1020.94	27.18		(None,)	3.8	-	-	399	428	388	355
(None,)	-	C44H50O26	1012.3	25.8		(None,)	8.6	-	-	13200	13200	9420	9570
(None,)	-	C49H71N13O10	1002.55	18.65		(None,)	1.1	-	-	5400	5420	4500	4550
(None,)	-	C37H58N7O17P3S	998.286	24.51		(None,)	1.2	-	-	25500	27800	33200	29300
(None,)	-	C44H50O25	996.305	26.99		(None,)	6.6	-	-	346	357	365	306
(None,)	-	C63H115D5O6	995.972	48.88		(None,)	0.4	-	-	97600	94700	130000	116000
(None,)	-	C48H80O20	994.55	19.06		(None,)	7.3	-	-	5930	6200	4790	4620
(None,)	-	C45H52O24	994.324	31.09		(None,)	4.8	-	-	571	573	584	497
(None,)	-	C65H89D5O6	993.769	32.53		(None,)	0.3	-	-	197000	169000	200000	180000
(None,)	-	C54H102O14	992.758	32.52		(None,)	1.2	-	-	4830	4880	5010	4750
(None,)	-	C55H104O13	990.777	33.19		(None,)	2.8	-	-	2720	2680	3690	3200
(None,)	-	C47H84O16P2	984.551	19.13		(None,)	5.8	-	-	6770	7350	5040	4520
(None,)	-	C65H89D5O6	976.737	32.53		(None,)	4.8	-	-	220	158	191	205
(None,)	-	C46H68N10O12	970.542	19.19		(None,)	5.5	-	-	6420	6740	4850	4850
(None,)	-	C65H108O5	969.83	29.24		(None,)	0.6	-	-	443	442	440	417
(None,)	-	C39H50O27	968.283	40.38		(None,)	2.8	-	-	264	254	186	157
(None,)	-	C32H54N7O18P3S	967.283	40.4		(None,)	2.5	-	-	304	290	205	196
(None,)	-	C40H52O26	966.311	25.91		(None,)	2.3	-	-	743	802	690	631
(None,)	-	C49H57N9O12	964.418	19.17		(None,)	1.2	-	-	105	163	142	117
(None,)	-	C51H92O15	962.669	20.75		(None,)	1.4	-	-	626	615	763	675
(None,)	-	C63H106O5	960.831	39.72		(None,)	4.7	-	-	1160	1050	1120	995
(None,)	-	C44H81NO21	960.516	18.37		(None,)	6	-	-	6890	6710	5230	4970
(None,)	-	C34H56N7O17P3S	960.276	35.67		(None,)	1.4	-	-	1720	1710	1590	1400
(None,)	-	C48H76O18	958.531	19.11		(None,)	4.9	-	-	7690	7130	5820	5560
(None,)	-	C37H61N7O21	957.421	18.78		(None,)	2	-	-	163	153	194	108
(None,)	-	C61H99D5O6	955.848	36.54		(None,)	0.2	-	-	157000	159000	179000	151000
(None,)	-	C39H50O26	952.296	26.38		(None,)	2.3	-	-	3160	3200	170	124
(None,)	-	C42H46O24	952.267	32.3		(None,)	3.5	-	-	1120	1060	1480	1310
(None,)	-	C32H54N7O17P3S	951.288	48.55		(None,)	0.3	-	-	248	235	187	151
(None,)	-	C43H82O17P2	950.534	19.06		(None,)	1.4	-	-	5390	6030	4670	4710
(None,)	-	C61H93D5O6	949.802	34.3		(None,)	0.4	-	-	175000	157000	171000	151000
(None,)	-	C57H102O9	948.792	34.29		(None,)	4.4	-	-	4840	4820	5490	4750
(None,)	-	C53H100O13	945.731	36.54		(None,)	6.2	-	-	493	460	455	397
(None,)	-	C50H70O16	944.517	18.46		(None,)	6.6	-	-	2160	2150	1620	1710
(None,)	-	C41H32O26	941.135	28.58		(None,)	8.7	-	-	1370	1160	1530	1200
(None,)	-	C61H110O5	940.862	25.28		(None,)	6.2	-	-	298	230	230	252
(None,)	-	C61H108O5	938.848	41.62		(None,)	5.6	-	-	1480	1400	1620	1430
(None,)	-	C52H72O14	938.525	19.07		(None,)	3.4	-	-	6720	7500	6190	5970
(None,)	-	C36H56O28	937.29	28.3		(None,)	3.7	-	-	98.7	118	96.6	86.3
(None,)	-	C46H78O19	935.523	19.17		(None,)	1	-	-	3280	3230	2450	2230
(None,)	-	C50H72N6O6S2	934.521	19.18		(None,)	7.6	-	-	6980	6200	4620	4750
(None,)	-	C57H102O8	932.8	38.09		(None,)	8.3	-	-	964	931	920	829
(None,)	-	C61H114O5	927.873	38.45		(None,)	2.5	-	-	95.3	105	155	117
(None,)	-	C40H28O25	926.13	28.45		(None,)	4.4	-	-	1430	1240	1700	1320
(None,)	-	C66H98O2	923.767	34.57		(None,)	0.8	-	-	1770	1740	1760	1550
(None,)	-	C41H45O23	923.266	34.61		(None,)	1.5	-	-	1800	1720	1680	1520
(None,)	-	C56H40O12	922.286	26.36		(None,)	0.3	-	-	403	420	396	384
(None,)	-	C55H66MgN4O6	920.51	18.53		(None,)	7.8	-	-	8330	8400	6360	6340
(None,)	-	C39H50O24	920.306	30.08		(None,)	2.9	-	-	789	798	807	672
(None,)	-	C42H46N6NiO14	917.247	28.31		(None,)	1.5	-	-	196	197	252	221
(None,)	-	C41H62N12O11	916.509	19.23		(None,)	0.2	-	-	11400	11600	8900	8020
(None,)	-	C59H108O5	914.85	42.45		(None,)	2.5	-	-	923	832	956	360
(None,)	-	C46H72O17	914.513	19.23		(None,)	1.6	-	-	8460	8580	6200	5930
(None,)	-	C44H52N10O11	914.415	18.93		(None,)	0.3	-	-	254	217	226	307
(None,)	-	C59H106O5	912.832	41.13		(None,)	5.6	-	-	3540	3430	3800	3550
(None,)	-	C59H104O5	910.816	39.74		(None,)	5.9	-	-	5500	5160	5540	4990
(None,)	-	C59H102O5	908.805	38.83		(None,)	0.5	-	-	1940	2030	2160	1970
(None,)	-	C29H47N7O17P3S	908.234	25.55		(None,)	3.6	-	-	2280	2190	2460	1970
(None,)	-	C55H70MgN4O6	907.525	23.21		(None,)	2.9	-	-	448	469	369	394
(None,)	-	C41H44O22	906.258	28.52		(None,)	8.1	-	-	37900	37000	40500	36900
(None,)	-	C41H76O16P2	904.503	18.71		(None,)	8.4	-	-	8770	8580	7180	7090
(None,)	-	C46H78O13P2	901.502	19.14		(None,)	1.4	-	-	5130	5410	4570	4580
(None,)	-	C56H94O7	896.728	27.04		(None,)	5.9	-	-	1610	1500	1280	1350
(None,)	-	C42H70O17S	896.491	18.38		(None,)	0.3	-	-	2010	1930	1520	1420
(None,)	-	C28H48N7O18P3S	896.203	24.64		(None,)	1.2	-	-	79.1	673	706	620
(None,)	-	C45H64N8O10	894.506	18.97		(None,)	6.8	-	-	8910	8190	7800	7500
(None,)	-	C40H45O23	894.245	25.25		(None,)	1.7	-	-	1450	1420	1420	1280
(None,)	-	C47H68O15	890.496	18.73		(None,)	6.2	-	-	7370	7730	5920	5150
(None,)	-	C48H38O16	888.255	33.58		(None,)	4.4	-	-	716	680	657	602
(None,)	-	C57H104O5	886.817	40.06		(None,)	3.7	-	-	1620	1510	1780	1580
(None,)	-	C44H76N4O10S2	885.505	19.27		(None,)	0.8	-	-	6600	6370	5940	5660
(None,)	-	C57H102O5	884.8	38.83		(None,)	6.3	-	-	4680	5020	5390	4990
(None,)	-	C45H73NO16	884.5	19.15		(None,)	1.3	-	-	13200	12300	9920	10100
(None,)	-	C49H71NO12	883.532	22.28		(None,)	0.7	-	-	1110	1200	327	315
(None,)	-	C49H54N8O8	883.417	19.17		(None,)	2.2	-	-	480	206	496	454
(None,)	-	C57H100O5	882.787	38.43		(None,)	3.8	-	-	1390	1480	1730	1620
(None,)	-	C46H62N4O12	880.484	18.29		(None,)	5.5	-	-	2220	2170	1840	1330
(None,)	-	C50H84O7P2	876.608	23.15		(None,)	0.2	-	-	1670	1690	1510	1380
(None,)	-	C41H44O21	873.242	41.82		(None,)	0.9	-	-	299	278	285	272
(None,)	-	C38H62O21	872.407	18.94		(None,)	2.4	-	-	425	202	356	517
(None,)	-	C44H68O16	870.488	19.1		(None,)	2.9	-	-	11900	11600	8510	8570
(None,)	-	C54H97D5O6	869.833	37.61		(None,)	0.2	-	-	136000	130000	160000	139000
(None,)	-	C39H42O21	864.264	24.63		(None,)	8.4	-	-	11800	12200	10000	8980
(None,)	-	C39H43O22	864.238	41.89		(None,)	4.2	-	-	78.1	67.7	84.2	76.7
(None,)	-	C32H44N8O15S2	862.28	27.53		(None,)	0	-	-	144	135	117	107
(None,)	-	C50H84O7P2	859.58	23.28		(None,)	1.5	-	-	1930	1920	1660	1650
(None,)	-	C42H56N4O14	858.409	18.81		(None,)	4.7	-	-	340	236	619	94.2
(None,)	-	C53H97D5O6	857.833	38.33		(None,)	0.2	-	-	145000	140000	183000	166000
(None,)	-	C47H66O13	856.485	19.1		(None,)	0.9	-	-	10500	9490	8830	10400
(None,)	-	C37H67N3O15P2	856.41	18.44		(None,)	2.2	-	-	238	285	215	172
(None,)	-	C38H40O21	850.246	32.6		(None,)	6.5	-	-	1520	1360	1240	1260
(None,)	-	C46H40O16	849.247	32.61		(None,)	9.4	-	-	2000	1840	1800	1710
(None,)	-	C40H38N4O16	848.268	25.67		(None,)	4.8	-	-	546	579	602	561
(None,)	-	C37H28N4Na2O10S3	848.118	36.74		(None,)	7.5	-	-	233	264	325	252
(None,)	-	C41H64O17	846.445	18.67		(None,)	2.3	-	-	22000	26700	18000	20200
(None,)	-	C39H39O20	845.238	29.88		(None,)	0.2	-	-	306	313	419	360
(None,)	-	C39H38O20	844.233	27.23		(None,)	2.1	-	-	150	155	185	168
(None,)	-	C43H66O15	840.477	19.05		(None,)	1.2	-	-	10500	12200	10600	11100
(None,)	-	C41H79N2O13P	839.537	28.35		(None,)	1.7	-	-	1280	1240	851	885
(None,)	-	C47H67NO12	838.475	19.12		(None,)	0.5	-	-	12600	12400	9220	9150
(None,)	-	C57H86O4	835.663	25.79		(None,)	3.3	-	-	2230	2470	2380	2110
(None,)	-	C37H60N4O16	834.427	18.21		(None,)	2.8	-	-	942	796	789	763
(None,)	-	C45H36O15	834.236	40.16		(None,)	2.6	-	-	2050	2280	2170	2070
(None,)	-	C46H40O15	833.237	40.16		(None,)	7.1	-	-	2740	3130	3160	2760
(None,)	-	C39H43O20	832.24	27.75		(None,)	1.3	-	-	36000	40500	41000	35800
(None,)	-	C39H43O20	832.236	40.16		(None,)	6.2	-	-	1380	1570	1490	1370
(None,)	-	C42H63N5O9S	831.465	18.51		(None,)	3.8	-	-	6370	6430	5260	5160
(None,)	-	C51H88O7	830.683	27.55		(None,)	2.4	-	-	2530	2550	2810	2130
(None,)	-	C41H64O17	829.421	17.71		(None,)	0.1	-	-	304	716	331	607
(None,)	-	C51H91D5O6	827.785	34.9		(None,)	0.9	-	-	154000	155000	163000	138000
(None,)	-	C41H63NO15	827.453	20.54		(None,)	2.3	-	-	901	1000	721	626
(None,)	-	C42H64O15	826.463	19.16		(None,)	4.6	-	-	16500	16200	13000	12100
(None,)	-	C46H56N4O9	826.426	17.43		(None,)	3.9	-	-	643	266	211	602
(None,)	-	C36H58N4O16	820.416	19.32		(None,)	2.5	-	-	511	625	396	465
(None,)	-	C34H41O22	819.246	35.21		(None,)	1.5	-	-	438	426	283	240
(None,)	-	C46H60N2O10	818.465	18.92		(None,)	8	-	-	8690	8470	7120	6320
(None,)	-	C39H62NO16	818.434	18.13		(None,)	1.3	-	-	2790	2180	1880	1900
(None,)	-	C35H44O21	818.275	24.71		(None,)	3.4	-	-	1230	1230	1350	1180
(None,)	-	C34H36N6O14S2	817.183	25.35		(None,)	1.8	-	-	98.8	117	109	104
(None,)	-	C42H63N5O9S	814.443	17.79		(None,)	0.7	-	-	709	14100	14900	554
(None,)	-	C36H44O21	813.237	31.67		(None,)	8.5	-	-	1470	1410	1350	1240
(None,)	-	C22H36N7O17P3S	813.136	26.66		(None,)	5.6	-	-	111	93.3	96.6	87.7
(None,)	-	C41H62O15	812.449	18.38		(None,)	0.9	-	-	3670	3630	2660	2710
(None,)	-	C33H40O22	806.231	29.2		(None,)	4.2	-	-	2430	2170	3260	2740
(None,)	-	C44H68O13	805.479	19.34		(None,)	0.2	-	-	6010	5900	4820	4720
(None,)	-	C34H42O21	804.261	25.42		(None,)	5.5	-	-	2470	2350	1680	1370
(None,)	-	C40H64O15	802.453	18.84		(None,)	0.4	-	-	8780	8360	6650	6430
(None,)	-	C38H40O18	802.247	26.74		(None,)	0.5	-	-	85.5	93.2	83.5	78.6
(None,)	-	C40H65NO15	800.445	18.44		(None,)	1	-	-	5850	5680	3690	3910
(None,)	-	C34H22O22	800.098	25.13		(None,)	4	-	-	243	211	230	223
(None,)	-	C49H80O7	798.629	25.37		(None,)	5.3	-	-	7290	7340	6710	5880
(None,)	-	C38H36O18	798.22	28.94		(None,)	3.3	-	-	128	127	163	157
(None,)	-	C41H62O14	796.45	18.31		(None,)	4.6	-	-	4790	4210	3420	3770
(None,)	-	C38H64O16	794.448	19.12		(None,)	5.7	-	-	16100	16000	13000	11700
(None,)	-	C37H39O18	789.245	32		(None,)	1.5	-	-	167	150	174	137
(None,)	-	C43H60O12	786.443	19.31		(None,)	0.9	-	-	19800	20100	14100	13100
(None,)	-	C35H28O20	786.146	25.13		(None,)	3.5	-	-	699	699	728	680
(None,)	-	C42H70O12	784.523	25.18		(None,)	0.6	-	-	871	985	1040	834
(None,)	-	C34H22O22	783.07	24.38		(None,)	0.5	-	-	445	438	365	293
(None,)	-	C36H37O18	775.23	30.78		(None,)	0.9	-	-	1980	2020	1920	1720
(None,)	-	C36H61N5O13	772.432	18.43		(None,)	2.2	-	-	17800	18000	13900	13000
(None,)	-	C34H42O19	772.272	0.06		(None,)	5.4	-	-	63.4	51.1	42.7	39.7
(None,)	-	C34H42O19	772.271	28.23		(None,)	3.8	-	-	1480	1510	1590	1390
(None,)	-	C47H83D5O6	771.722	31.81		(None,)	0.2	-	-	140000	141000	153000	136000
(None,)	-	C49H84O5	770.662	0.06		(None,)	2.8	-	-	266	272	198	162
(None,)	-	C39H63NO14	770.433	19.11		(None,)	1.4	-	-	21400	21900	16900	16000
(None,)	-	C33H36O20	770.22	28.5		(None,)	6.4	-	-	630	624	815	705
(None,)	-	C42H56N2O10	766.434	18.95		(None,)	7.8	-	-	13300	13400	10200	9290
(None,)	-	C32H39O21	760.198	24.36		(None,)	8.6	-	-	2990	2690	3220	2920
(None,)	-	C32H37O20	759.217	37.13		(None,)	3.7	-	-	2290	2190	2200	1840
(None,)	-	C38H63NO14	758.429	19.06		(None,)	3.1	-	-	13100	13100	10200	9060
(None,)	-	C39H32O15	758.206	24.41		(None,)	0.6	-	-	1790	1780	1880	1700
(None,)	-	C31H37N3O17S	756.193	24.01		(None,)	0.1	-	-	438	440	368	356
(None,)	-	C37H63N5O7S2	754.426	19.1		(None,)	1.7	-	-	18000	17100	20100	18800
(None,)	-	C37H48N6O6S2	754.34	21.18		(None,)	1.1	-	-	1090	1140	1120	1110
(None,)	-	C51H88O2	750.707	43.8		(None,)	6.6	-	-	772	763	863	765
(None,)	-	C51H86O2	748.693	42.04		(None,)	3.9	-	-	1590	1570	1840	1640
(None,)	-	C44H50N4O6	748.408	18.28		(None,)	8.5	-	-	6650	5960	4650	4760
(None,)	-	C42H67NO10	746.486	21.09		(None,)	0.2	-	-	6320	5680	6240	6020
(None,)	-	C35H35O17	745.228	32.97		(None,)	6.5	-	-	419	356	282	257
(None,)	-	C30H46O16S2	744.26	24.69		(None,)	1	-	-	432	403	1650	1660
(None,)	-	C32H38O19	744.236	19.61		(None,)	2	-	-	295	392	240	252
(None,)	-	C44H70O9	743.501	20.51		(None,)	1	-	-	1190	1160	825	909
(None,)	-	C36H36O16	742.233	24.74		(None,)	0	-	-	147	169	136	275
(None,)	-	C32H36O20	741.203	23.47		(None,)	7.3	-	-	271	236	254	225
(None,)	-	C51H78O2	740.638	0.06		(None,)	3.5	-	-	348	296	230	165
(None,)	-	C43H52N4O6	738.412	18.6		(None,)	0.6	-	-	14300	14900	12200	10600
(None,)	-	C51H92O2	737.711	29.95		(None,)	6.6	-	-	2130	2100	2190	1970
(None,)	-	C18H24N6O18P4	737.014	27.58		(None,)	0	-	-	79.1	109	118	114
(None,)	-	C28H49N9O10S2	736.31	19.04		(None,)	3.2	-	-	285	557	186	209
(None,)	-	C39H67N5O7	735.544	36.12		(None,)	7.4	-	-	797	629	610	844
(None,)	-	C41H66O11	735.465	24.55		(None,)	1.9	-	-	1060	1450	1510	918
(None,)	-	C39H56O12	734.417	19.14		(None,)	6.6	-	-	13500	7460	7070	10400
(None,)	-	C40H60O12	733.41	18.76		(None,)	0.3	-	-	2960	2830	2220	5840
(None,)	-	C43H70O8	732.546	19.71		(None,)	6.7	-	-	625000	511000	600000	483000
(None,)	-	C38H54N2O11	732.407	18.34		(None,)	7.9	-	-	6700	6670	5730	5270
(None,)	-	C34H39N3O12S	731.259	23.77		(None,)	0.9	-	-	256	325	317	263
(None,)	-	C44H64N4O4	730.527	20.12		(None,)	0	-	-	9170	8380	6870	7020
(None,)	-	C42H59N5O6	730.455	21.59		(None,)	0.9	-	-	7940	7570	6020	5670
(None,)	-	C40H59NO11	730.408	18.73		(None,)	1.6	-	-	9890	10200	15000	3470
(None,)	-	C32H40O18	730.253	19.73		(None,)	3.1	-	-	2550	2510	2660	2390
(None,)	-	C31H36O19	730.214	27.87		(None,)	6.3	-	-	1810	1820	2380	2220
(None,)	-	C45H76O7	729.572	23.8		(None,)	6.8	-	-	4430	4470	4340	4080
(None,)	-	C37H61NO13	728.415	18.69		(None,)	0.5	-	-	11100	10400	8170	7240
(None,)	-	C30H30O20	728.165	21.61		(None,)	0.7	-	-	50	49.8	42.9	40.7
(None,)	-	C42H46O11	727.317	19.11		(None,)	1.7	-	-	219	448	297	271
(None,)	-	C50H76O2	726.623	0.06		(None,)	5.6	-	-	375	359	253	235
(None,)	-	C32H55N9O10	726.42	19.22		(None,)	7	-	-	12800	12400	9020	8650
(None,)	-	C51H78O	724.641	30.1		(None,)	1.9	-	-	2750	2380	2850	2280
(None,)	-	C50H74O2	724.609	26.53		(None,)	7.8	-	-	2620	2550	2580	2500
(None,)	-	C36H34O15	724.214	27.66		(None,)	0.4	-	-	123	118	131	116
(None,)	-	C32H34O18	724.207	35.78		(None,)	0.8	-	-	322	335	395	310
(None,)	-	C50H90O2	723.697	28.66		(None,)	0.4	-	-	840	914	951	615
(None,)	-	C38H52N6O7	722.426	19.54		(None,)	7.1	-	-	17200	18100	13500	13100
(None,)	-	C36H32O15	722.208	35.78		(None,)	0.1	-	-	1630	1810	1990	1560
(None,)	-	C36H46O14	720.309	18.85		(None,)	0.6	-	-	371	302	237	561
(None,)	-	C42H85NO6	717.672	29.26		(None,)	0.3	-	-	193	175	213	184
(None,)	-	C37H44O13	714.312	18.59		(None,)	3.5	-	-	730	166	550	202
(None,)	-	C37H44O13	714.312	20.73		(None,)	0.2	-	-	144	142	136	135
(None,)	-	C28H54N8O10S	712.405	19.1		(None,)	2.5	-	-	26300	27200	18700	18600
(None,)	-	C46H48N2O4	710.406	18.81		(None,)	0.1	-	-	8280	8230	5950	16500
(None,)	-	C41H73NO8	708.545	23.67		(None,)	5.5	-	-	8830	8880	10200	9330
(None,)	-	C43H79D5O5	703.696	30.37		(None,)	0.9	-	-	21100	19200	20300	17000
(None,)	-	C47H72O3	702.575	24.07		(None,)	7	-	-	987	1150	1070	1040
(None,)	-	C41H64O8	702.497	19.69		(None,)	2.7	-	-	52400	50900	30500	30500
(None,)	-	C35H56O14	701.377	23.64		(None,)	2.4	-	-	540	548	486	537
(None,)	-	C39H73NO9	700.54	22.2		(None,)	0.1	-	-	2340	1840	2180	2730
(None,)	-	C33H46O15	700.31	19.65		(None,)	4.8	-	-	508	694	289	266
(None,)	-	C29H33N9O12	700.23	24.43		(None,)	1.1	-	-	706	748	793	764
(None,)	-	C40H43NO9	699.317	18.47		(None,)	1.4	-	-	564	336	266	200
(None,)	-	C30H39N3O13S	699.252	27.37		(None,)	2	-	-	715	758	794	723
(None,)	-	C48H72O2	698.59	26.46		(None,)	3.1	-	-	2940	2750	2860	2700
(None,)	-	C37H45NO12	696.292	18.87		(None,)	2.8	-	-	411	241	692	357
(None,)	-	C43H71D5O5	695.635	27.3		(None,)	0.1	-	-	62100	61800	62700	51300
(None,)	-	C27H18O20S	695.016	20.52		(None,)	3	-	-	460	333	115	73.9
(None,)	-	C31H41N5O12	693.313	19.1		(None,)	0.2	-	-	514	1030	359	640
(None,)	-	C32H36O17	693.204	27.26		(None,)	0.9	-	-	1500	1600	2140	2020
(None,)	-	C37H54O11	692.395	19.13		(None,)	6.7	-	-	13300	14500	11400	11600
(None,)	-	C41H68O7	690.524	19.75		(None,)	7.5	-	-	64300	61400	41100	50300
(None,)	-	C48H80O2	689.617	41.21		(None,)	8.2	-	-	1070	1030	2000	1610
(None,)	-	C37H70NO7P	689.524	19.77		(None,)	1.5	-	-	288000	285000	237000	237000
(None,)	-	C43H63D5O5	687.571	25.72		(None,)	0.3	-	-	34400	34500	31700	29200
(None,)	-	C29H33O16P	686.18	23.76		(None,)	5.3	-	-	2470	2520	2730	2370
(None,)	-	C35H57NO11	685.433	26.07		(None,)	7.7	-	-	12100	11800	14700	13900
(None,)	-	C34H56N2O12	685.392	19.12		(None,)	0.5	-	-	5540	7300	6860	6590
(None,)	-	C30H36O18	685.198	34.49		(None,)	0.3	-	-	1020	1080	1290	1140
(None,)	-	C35H54O12	684.392	19.05		(None,)	4.2	-	-	19800	18700	14500	13900
(None,)	-	C43H59D5O5	683.541	24.87		(None,)	0.4	-	-	26100	25300	26300	24200
(None,)	-	C46H80O2	682.645	39.08		(None,)	4.6	-	-	1860	1830	2280	1820
(None,)	-	C30H48N8O9	682.392	18.39		(None,)	4	-	-	28900	30400	23200	22700
(None,)	-	C30H33O18	682.173	21.03		(None,)	1.5	-	-	68.9	56.1	61.6	64.9
(None,)	-	C40H40O10	681.274	26.07		(None,)	3.5	-	-	214	190	212	267
(None,)	-	C36H44N4O8	678.351	26.08		(None,)	0.1	-	-	2550	2370	2890	2210
(None,)	-	C35H32O13	678.213	29.41		(None,)	3.2	-	-	102	107	119	105
(None,)	-	C30H45NO15	677.32	18.31		(None,)	5.8	-	-	1520	992	447	396
(None,)	-	C36H44N4O7S	677.307	28.57		(None,)	3.9	-	-	319	435	499	310
(None,)	-	C33H57NO13	676.389	19.11		(None,)	0.9	-	-	7680	7030	6090	5410
(None,)	-	C41H75D5O5	675.666	29.22		(None,)	0	-	-	31100	28100	28300	24100
(None,)	-	C35H56N6O6	674.462	21.29		(None,)	2.3	-	-	8740	7890	9130	8240
(None,)	-	C25H48N6O14	674.367	18.1		(None,)	5.7	-	-	11600	11300	6870	7420
(None,)	-	C46H70O2	672.577	0.06		(None,)	6.6	-	-	308	253	239	145
(None,)	-	C36H38N4O8	672.308	18.64		(None,)	3.8	-	-	441	709	200	353
(None,)	-	C35H43NO11	671.312	18.48		(None,)	4.3	-	-	267	1020	369	729
(None,)	-	C37H48O10	670.377	18.1		(None,)	7	-	-	4080	4440	3100	3260
(None,)	-	C30H36O16	670.238	23.56		(None,)	5	-	-	1080	1040	830	782
(None,)	-	C46H66O2	668.543	25.03		(None,)	3.7	-	-	2160	3030	2600	2470
(None,)	-	C36H42O11	668.308	18.97		(None,)	1.5	-	-	376	387	258	563
(None,)	-	C23H30N12O8S2	667.176	22.87		(None,)	0	-	-	290	236	227	264
(None,)	-	C33H47NO13	666.311	17.7		(None,)	3.1	-	-	410	309	320	116
(None,)	-	C27H34O18	664.203	28.44		(None,)	4.7	-	-	1010	977	975	752
(None,)	-	C45H74O3	663.574	25.48		(None,)	0.4	-	-	625	634	721	477
(None,)	-	C32H52O13	662.38	19.12		(None,)	6.5	-	-	15000	13700	12500	11300
(None,)	-	C25H41N8O10P	662.308	18.99		(None,)	1.4	-	-	529	532	476	319
(None,)	-	C36H50O10	660.373	18.4		(None,)	3.1	-	-	4490	13100	10400	3580
(None,)	-	C36H45N5O5S	660.316	18.23		(None,)	2.8	-	-	220	946	874	255
(None,)	-	C37H44N4O6	658.371	18.43		(None,)	2.9	-	-	12900	12500	9660	9560
(None,)	-	C25H47N5O15	658.318	19.38		(None,)	2.7	-	-	955	959	606	464
(None,)	-	C28H31O17	657.195	26.66		(None,)	6.3	-	-	1980	1750	2530	2120
(None,)	-	C37H50O9	656.377	18.77		(None,)	2.2	-	-	13400	13700	10900	10200
(None,)	-	C24H38N4O8S4	656.196	26.66		(None,)	5.8	-	-	1470	1340	1890	1610
(None,)	-	C36H60O10	653.429	21.75		(None,)	3.6	-	-	1010	1340	1040	1090
(None,)	-	C39H44N2O7	653.318	17.71		(None,)	3.8	-	-	266	251	752	877
(None,)	-	C35H54O11	651.38	19.1		(None,)	7.2	-	-	9130	9580	6710	6770
(None,)	-	C29H30O17	651.149	22.52		(None,)	7.4	-	-	67.4	65.7	66.2	57.6
(None,)	-	C22H45N6O13P	650.302	18.85		(None,)	2.4	-	-	1280	304	269	152
(None,)	-	C32H56O13	649.379	18.92		(None,)	0.1	-	-	8100	8090	4780	4860
(None,)	-	C39H66O2S2	648.479	20.15		(None,)	7.5	-	-	3610	3660	2740	3060
(None,)	-	C33H50N4O6S	648.381	19.05		(None,)	1	-	-	14600	14700	12100	10800
(None,)	-	C30H30O15	648.189	33.34		(None,)	3.1	-	-	737	644	733	579
(None,)	-	C43H66O4	647.498	19.84		(None,)	6.7	-	-	9190	10600	7370	7880
(None,)	-	C32H54O13	647.371	18.56		(None,)	4.4	-	-	2860	3000	3240	2790
(None,)	-	C38H44O8	646.354	17.36		(None,)	6.3	-	-	970	5670	564	4170
(None,)	-	C45H72O2	645.555	35.95		(None,)	7.5	-	-	745	725	1040	843
(None,)	-	C34H65N3O5S	645.498	19.83		(None,)	0	-	-	285000	289000	232000	203000
(None,)	-	C28H46N6O8S	644.342	16.16		(None,)	0.2	-	-	409	614	286	286
(None,)	-	C42H72O3	642.584	0.06		(None,)	0.7	-	-	892	717	578	407
(None,)	-	C42H72O3	642.587	28.18		(None,)	7.7	-	-	5750	5840	6060	5290
(None,)	-	C30H52N5O8P	642.366	17.97		(None,)	0.2	-	-	10100	9890	18000	17900
(None,)	-	C37H42N4O5	640.357	18.62		(None,)	4.4	-	-	24900	24500	19500	18600
(None,)	-	C32H48N2O10	638.368	19.11		(None,)	3.9	-	-	31600	31900	24300	23700
(None,)	-	C25H46N8O10	636.369	19.09		(None,)	0.2	-	-	24800	9280	18900	19000
(None,)	-	C40H58O6	635.436	21.9		(None,)	4.7	-	-	1130	1110	978	998
(None,)	-	C30H34O15	635.201	30.02		(None,)	3.4	-	-	110	123	91.5	86.8
(None,)	-	C33H45NO10	633.342	16.94		(None,)	1.3	-	-	1850	2400	2050	811
(None,)	-	C35H42N4O6	632.352	17.65		(None,)	0.1	-	-	4160	3940	3050	8470
(None,)	-	C35H41N5O5	629.351	18.27		(None,)	5.6	-	-	1170	2630	2870	4270
(None,)	-	C37H42N2O6	628.341	16.92		(None,)	4.4	-	-	1770	2010	1280	1520
(None,)	-	C26H31N3O12S	627.197	27.75		(None,)	0.5	-	-	671	710	658	552
(None,)	-	C32H51NO11	626.361	18.63		(None,)	7.6	-	-	11500	11700	16800	5940
(None,)	-	C24H35NO18	626.198	27.74		(None,)	7.3	-	-	549	566	559	477
(None,)	-	C22H38O19	624.235	26.55		(None,)	0.7	-	-	670	661	696	601
(None,)	-	C33H43N5O6	623.359	19.14		(None,)	5.1	-	-	14900	14500	10800	10300
(None,)	-	C32H46N8O5	623.364	28.58		(None,)	1.9	-	-	1760	1750	2000	1640
(None,)	-	C32H30O13	623.181	19.09		(None,)	0.4	-	-	157	166	152	143
(None,)	-	C30H53NO11	621.398	0.55		(None,)	0.8	-	-	539	992	500	1440
(None,)	-	C29H41N5O9	621.33	17.4		(None,)	5.6	-	-	2200	1770	2450	1870
(None,)	-	C37H67D5O5	619.602	27.21		(None,)	2.1	-	-	32100	32100	32800	28800
(None,)	-	C35H52O8	618.398	20.16		(None,)	0.8	-	-	3730	3090	3360	3220
(None,)	-	C32H44N2O9	618.344	17.36		(None,)	1.7	-	-	1690	1790	1380	1130
(None,)	-	C23H45N5O13	617.335	17.32		(None,)	1.4	-	-	2940	1320	2190	1260
(None,)	-	C35H40N4O5	614.34	17.39		(None,)	9.5	-	-	7070	6120	5620	5470
(None,)	-	C30H28O12S	613.134	21.18		(None,)	0	-	-	89.7	43.6	64.2	62.8
(None,)	-	C36H42N4O4	612.348	18.28		(None,)	3.5	-	-	17100	16500	12900	12100
(None,)	-	C27H31O16	612.164	23.25		(None,)	5.8	-	-	384	351	303	354
(None,)	-	C25H27N3O12S	611.171	22.01		(None,)	5.7	-	-	926	1070	1000	926
(None,)	-	C32H48O10	610.357	19.1		(None,)	0.6	-	-	23000	22500	20600	18300
(None,)	-	C32H41N5O6	609.346	17.09		(None,)	0.7	-	-	636	608	513	591
(None,)	-	C35H58O7	608.454	26.05		(None,)	0.3	-	-	7010	6780	7100	6620
(None,)	-	C33H42N4O6	608.351	17.56		(None,)	0.2	-	-	1560	2200	1710	1280
(None,)	-	C24H35N3O12S	607.228	17.84		(None,)	5	-	-	171	151	165	172
(None,)	-	C35H56O7	606.434	25.6		(None,)	1.7	-	-	5060	4560	6370	5940
(None,)	-	C26H43N11O6	606.35	19.14		(None,)	4.1	-	-	24000	24700	18200	16600
(None,)	-	C32H45NO9	605.348	18.95		(None,)	1.1	-	-	9800	9560	3260	6190
(None,)	-	C35H54O7	604.428	20.87		(None,)	0.7	-	-	4400	4160	4160	4130
(None,)	-	C33H46O9	604.351	19.14		(None,)	4.5	-	-	14500	16200	13200	11400
(None,)	-	C31H53NO9	601.414	20.75		(None,)	1.6	-	-	741	971	1200	1290
(None,)	-	C30H62O10	600.47	0.86		(None,)	0.8	-	-	25700	120000	18300	38500
(None,)	-	C34H38N4O5	600.334	18.29		(None,)	0.5	-	-	22500	21600	3670	14400
(None,)	-	C29H40N8O5	598.342	18.46		(None,)	0	-	-	19700	19200	16700	11700
(None,)	-	C34H28O9	598.205	19.14		(None,)	5.2	-	-	182	202	196	126
(None,)	-	C32H41N3O7	597.343	18.2		(None,)	0.7	-	-	2910	2430	1970	1980
(None,)	-	C31H30O11	596.212	23		(None,)	1.4	-	-	213	200	165	141
(None,)	-	C15H25N5O15P2	595.131	21.13		(None,)	4.8	-	-	87.5	106	83.2	130
(None,)	-	C35H43N7O2	594.346	18.64		(None,)	8	-	-	12100	13300	10000	8930
(None,)	-	C30H24O12	594.158	18.88		(None,)	4.2	-	-	3000	2280	2340	2210
(None,)	-	C34H56O8	593.406	21.44		(None,)	0	-	-	2720	2720	2510	2440
(None,)	-	C32H41N5O5	593.346	18.51		(None,)	7.4	-	-	11900	1920	13000	10100
(None,)	-	C22H29N3O13S	593.175	22.01		(None,)	4.3	-	-	424	401	284	315
(None,)	-	C26H22O15	592.127	20.1		(None,)	2.7	-	-	68.2	59.7	91.5	72.2
(None,)	-	C35H63D5O5	591.568	26.35		(None,)	5.6	-	-	20100	19400	20400	17600
(None,)	-	C33H52N2O6	590.417	20.69		(None,)	6.2	-	-	16200	16200	17100	3710
(None,)	-	C28H28O13	590.186	27.06		(None,)	5.2	-	-	369	384	339	302
(None,)	-	C27H40N2O8S2	585.228	18.07		(None,)	0.1	-	-	567	264	122	155
(None,)	-	C34H38N4O4	584.326	17.84		(None,)	4.6	-	-	22800	22400	17900	18200
(None,)	-	C30H30O12	583.186	25.54		(None,)	5.8	-	-	535	467	542	394
(None,)	-	C35H40N4O3	582.344	19.01		(None,)	0.1	-	-	13700	14500	11600	11000
(None,)	-	C27H33NO12	581.234	21.36		(None,)	0.3	-	-	107	103	117	113
(None,)	-	C27H46O12	580.336	18.36		(None,)	3.7	-	-	22100	22700	17800	18000
(None,)	-	C28H48O9S	578.337	19.24		(None,)	0.3	-	-	27600	27700	18300	17200
(None,)	-	C27H28O13	578.193	19.06		(None,)	4.3	-	-	283	348	273	229
(None,)	-	C22H23N6Na2O8P	577.117	18.9		(None,)	2.7	-	-	246	215	191	171
(None,)	-	C36H38N4O2	576.34	19.03		(None,)	0.5	-	-	13400	14000	11100	10900
(None,)	-	C35H63D5O5	574.54	26.28		(None,)	6	-	-	2960	3300	3080	3100
(None,)	-	C35H63D5O5	574.55	30.95		(None,)	6.2	-	-	1550	1560	1760	1500
(None,)	-	C34H52O6	574.406	21.45		(None,)	6.5	-	-	3930	3670	4450	3820
(None,)	-	C33H32O9	573.218	18.49		(None,)	7.8	-	-	260	148	358	171
(None,)	-	C31H54O8	572.42	21.28		(None,)	1.2	-	-	2810	8820	3300	3340
(None,)	-	C32H42O8	572.328	18.2		(None,)	9	-	-	7260	7770	6520	6470
(None,)	-	C27H26N2O7S2	572.156	19.3		(None,)	0.6	-	-	264	296	212	209
(None,)	-	C40H70	568.588	34.59		(None,)	4.1	-	-	3850	3600	3890	2270
(None,)	-	C30H33NO10	568.211	19.11		(None,)	1.5	-	-	178	281	197	172
(None,)	-	C28H38N8O5	567.304	28.57		(None,)	0.1	-	-	597	598	779	612
(None,)	-	C27H47N7O6	566.363	19.45		(None,)	2.3	-	-	4520	4170	2030	2330
(None,)	-	C37H54O3	564.44	23.84		(None,)	3.4	-	-	1860	2160	2990	2830
(None,)	-	C33H59D5O5	563.536	25.51		(None,)	7.7	-	-	14400	12900	14600	12500
(None,)	-	C30H43NO8	563.337	19.15		(None,)	1.1	-	-	4490	4330	3560	5260
(None,)	-	C37H52O4	561.391	19.98		(None,)	1.7	-	-	4530	5990	5610	5330
(None,)	-	C23H34N3O10P	561.236	16.68		(None,)	1.3	-	-	440	466	394	317
(None,)	-	C27H28O13	561.172	19.98		(None,)	1	-	-	172	243	239	209
(None,)	-	C34H54O5	560.433	22.54		(None,)	2.1	-	-	2120	2160	1930	2060
(None,)	-	C37H53NO3	560.405	20.77		(None,)	2.5	-	-	2190	2360	1410	3200
(None,)	-	C24H47NO10S	559.33	18.79		(None,)	2	-	-	4840	4870	3290	4420
(None,)	-	C37H52N2O	558.446	19.99		(None,)	6.4	-	-	37100	43200	32000	36000
(None,)	-	C21H27N5O9S2	558.134	20.9		(None,)	1.6	-	-	56.8	57.9	50.1	61.3
(None,)	-	C32H42O7	556.33	18.33		(None,)	3.6	-	-	13900	14200	10900	11300
(None,)	-	C40H74	555.587	33.76		(None,)	0.1	-	-	1390	1490	1690	1440
(None,)	-	C33H63NO4	555.508	31.38		(None,)	1.7	-	-	1960	2060	2170	1960
(None,)	-	C35H52O4	554.424	20.5		(None,)	4.7	-	-	16900	15400	13300	13100
(None,)	-	C25H27O13	553.175	26.45		(None,)	2.4	-	-	146	144	157	126
(None,)	-	C22H25N6O8P	550.182	19.31		(None,)	1.2	-	-	388	406	259	271
(None,)	-	C30H42O8	548.32	19.22		(None,)	0.3	-	-	30000	29500	20600	20600
(None,)	-	C31H63NO5	547.496	26.13		(None,)	0.2	-	-	4490	4420	5050	4170
(None,)	-	C23H39N5O5S2	547.27	17.79		(None,)	2.3	-	-	3650	3850	3290	3310
(None,)	-	C40H48	546.407	22.29		(None,)	2.8	-	-	5070	4800	5230	4760
(None,)	-	C27H45O8P	546.323	18.8		(None,)	5.2	-	-	5510	12700	9470	9790
(None,)	-	C20H29N2NaO11S	546.169	25.01		(None,)	2.4	-	-	200	153	213	194
(None,)	-	C19H38N5O10P	545.268	16.86		(None,)	1.4	-	-	2200	2230	1600	1770
(None,)	-	C29H36O10	545.234	17.32		(None,)	4.9	-	-	582	683	79.7	773
(None,)	-	C26H56NO5PS	543.395	20.32		(None,)	0.6	-	-	2760	2570	2640	2430
(None,)	-	C29H34O10	543.226	17.3		(None,)	4.5	-	-	658	715	650	588
(None,)	-	C35H60N2O	542.509	26.58		(None,)	7.8	-	-	1750	1790	1990	1730
(None,)	-	C24H44O12	542.31	17.56		(None,)	4.1	-	-	6500	6790	5310	5210
(None,)	-	C28H47NO9	542.329	19.25		(None,)	1.3	-	-	3150	3330	2280	1520
(None,)	-	C25H32O12	542.218	19.15		(None,)	3.2	-	-	328	415	314	214
(None,)	-	C35H54O3	540.446	21.03		(None,)	8.7	-	-	62800	58100	26500	53000
(None,)	-	C27H55O7P	540.408	20.13		(None,)	6.1	-	-	13500	12800	6960	8440
(None,)	-	C31H38O7	540.3	16.96		(None,)	7.1	-	-	6510	6890	4440	4670
(None,)	-	C37H48N2O	537.385	21.93		(None,)	1.5	-	-	2570	2490	2320	1960
(None,)	-	C24H23O13	537.149	21.5		(None,)	1.1	-	-	1430	1240	1260	1060
(None,)	-	C25H26O10S	536.163	24.9		(None,)	8.3	-	-	1760	1740	1570	1390
(None,)	-	C31H55D5O5	535.507	24.77		(None,)	1.8	-	-	14500	15600	15200	14300
(None,)	-	C27H34O11	535.209	19.29		(None,)	0.3	-	-	421	280	194	147
(None,)	-	C29H28N2O7	534.224	18.22		(None,)	0.4	-	-	479	390	286	412
(None,)	-	C31H32O8	533.22	18.67		(None,)	3	-	-	463	522	243	270
(None,)	-	C35H60O2	530.49	28.14		(None,)	4.7	-	-	1650	1540	1650	1460
(None,)	-	C40H48	529.38	19.37		(None,)	4.2	-	-	78000	68300	69300	55700
(None,)	-	C33H25N3O3	529.214	18.91		(None,)	0.5	-	-	478	409	260	340
(None,)	-	C27H30N2O6S	528.213	19.33		(None,)	6.8	-	-	763	883	587	475
(None,)	-	C31H59NO4	527.471	24.87		(None,)	7.4	-	-	2500	2580	2690	2570
(None,)	-	C34H55NO3	526.407	20.36		(None,)	3.3	-	-	41900	19000	36600	34000
(None,)	-	C28H36N4O3S	526.287	17.82		(None,)	3.7	-	-	53900	54800	37600	36500
(None,)	-	C25H32O11	526.232	18.82		(None,)	0.3	-	-	559	418	364	331
(None,)	-	C27H41NO6S	525.307	18.17		(None,)	1.9	-	-	4730	5570	9960	4110
(None,)	-	C30H50O6	524.399	21.23		(None,)	7.7	-	-	8890	8510	8590	8150
(None,)	-	C27H42N2O5S	524.311	18.64		(None,)	1	-	-	16500	16100	10200	8720
(None,)	-	C26H53NO7P	523.364	21.87		(None,)	1	-	-	3090	3080	3090	2890
(None,)	-	C16H16K4O6P2	522.902	31.13		(None,)	1.3	-	-	164	151	156	130
(None,)	-	C36H72	522.594	24.15		(None,)	4.9	-	-	583	559	431	408
(None,)	-	C32H43NO5	522.324	18.93		(None,)	3.7	-	-	19000	20400	15100	13700
(None,)	-	C24H40O11	522.291	17.38		(None,)	0.1	-	-	12400	13100	9440	9720
(None,)	-	C31H52O6	521.379	20.35		(None,)	4.7	-	-	3360	3060	3210	3060
(None,)	-	C28H54O8	519.389	21.77		(None,)	4.4	-	-	2230	2800	3290	2800
(None,)	-	C33H42O5	519.31	18.16		(None,)	1.8	-	-	2530	2940	2220	2260
(None,)	-	C27H34O10	519.221	18.19		(None,)	2	-	-	570	590	538	576
(None,)	-	C30H45NO5	517.366	20.05		(None,)	0.3	-	-	5290	5540	3530	4020
(None,)	-	C21H33N5O5S2	517.228	18.48		(None,)	3.1	-	-	821	389	1410	437
(None,)	-	C26H42O9	516.311	18.84		(None,)	4	-	-	6320	6980	4950	4070
(None,)	-	C32H36N2O3	514.306	18.84		(None,)	3.3	-	-	9770	11200	8700	4490
(None,)	-	C29H25N3O5	513.216	18.05		(None,)	3.4	-	-	659	911	822	701
(None,)	-	C22H38O13	511.241	28.58		(None,)	5.6	-	-	1900	1720	1920	1690
(None,)	-	C33H48O3	510.398	20.63		(None,)	6.5	-	-	16000	16200	15500	13900
(None,)	-	C30H36O6	510.298	18.06		(None,)	8.5	-	-	45500	45000	35600	37500
(None,)	-	C29H36NO5P	510.233	19.11		(None,)	0.6	-	-	982	904	488	433
(None,)	-	C28H32N2O7	509.225	17.9		(None,)	2.2	-	-	330	435	284	403
(None,)	-	C27H38O8	508.287	18.01		(None,)	6.4	-	-	17400	16900	13400	13500
(None,)	-	C25H30O10	508.215	17.42		(None,)	3.2	-	-	231	277	147	189
(None,)	-	C25H47NO8	507.367	19.41		(None,)	6.4	-	-	129000	128000	95200	60000
(None,)	-	C20H36N6O8	506.292	16.99		(None,)	1.5	-	-	6220	6000	3990	4300
(None,)	-	C24H40N8O4	505.32	19.29		(None,)	5.2	-	-	5590	5330	3950	3380
(None,)	-	C28H58N2O4	504.486	25.06		(None,)	5	-	-	4320	4000	3690	3650
(None,)	-	C25H45NO9	504.302	18.72		(None,)	0.5	-	-	4750	5600	5790	5270
(None,)	-	C17H19N4O11P	504.112	17.11		(None,)	1	-	-	136	150	99.8	101
(None,)	-	C27H34O9	503.231	18.13		(None,)	0.1	-	-	576	528	1990	278
(None,)	-	C20H22O15	503.105	23.94		(None,)	1.6	-	-	52.9	39.5	37.4	38.3
(None,)	-	C26H44O8	502.337	20.29		(None,)	3.1	-	-	7070	14900	3570	4110
(None,)	-	C24H34O10	500.25	20.03		(None,)	0.2	-	-	3290	2870	3320	2960
(None,)	-	C28H30N6OS	499.232	17.52		(None,)	6.5	-	-	930	328	297	499
(None,)	-	C22H40O11	498.29	18.2		(None,)	0.3	-	-	11600	10700	8290	8120
(None,)	-	C30H38O5	496.3	18.7		(None,)	4	-	-	3390	4410	3010	2990
(None,)	-	C26H38O9	495.263	26.08		(None,)	7.5	-	-	2890	2940	3430	3090
(None,)	-	C31H27NO4	495.226	18.72		(None,)	1.7	-	-	475	582	366	355
(None,)	-	C34H68	494.563	23.53		(None,)	2.3	-	-	250	206	170	147
(None,)	-	C26H52O7	494.408	21.43		(None,)	5.8	-	-	5350	4680	5270	4660
(None,)	-	C30H36O5	494.292	18.12		(None,)	2.5	-	-	24600	25100	20400	22300
(None,)	-	C21H29N6O5P	494.229	19.45		(None,)	2.8	-	-	500	735	290	234
(None,)	-	C20H21N8NaO5	494.186	21.78		(None,)	0.2	-	-	127	138	113	131
(None,)	-	C27H29N3O6	492.21	18.9		(None,)	5.8	-	-	232	417	262	655
(None,)	-	C21H36N4O8	490.293	17.72		(None,)	0.7	-	-	14900	14400	17100	16400
(None,)	-	C25H28O9	490.211	19.34		(None,)	0.8	-	-	493	544	315	294
(None,)	-	C17H28O15	490.184	17.89		(None,)	6.5	-	-	773	950	798	942
(None,)	-	C25H25N7O3	489.234	16.32		(None,)	2.5	-	-	1830	1600	1550	1570
(None,)	-	C29H46N2O3	488.386	21.83		(None,)	2.2	-	-	5320	5220	5540	5170
(None,)	-	C30H34N2O3	488.288	18.6		(None,)	2.4	-	-	5010	13000	9710	9700
(None,)	-	C26H30O8	488.225	18.64		(None,)	0.6	-	-	459	1100	776	370
(None,)	-	C25H43NO7	487.331	20.43		(None,)	1	-	-	3830	6550	1920	1230
(None,)	-	C23H34O11	487.21	16.62		(None,)	2.3	-	-	2170	903	1150	741
(None,)	-	C30H48N2O2	486.403	21.61		(None,)	5.1	-	-	5680	5260	5620	5260
(None,)	-	C27H36N2O5	486.299	18.62		(None,)	3.9	-	-	5330	4820	3850	4070
(None,)	-	C23H32O10	486.231	17.94		(None,)	4.3	-	-	1370	598	1040	695
(None,)	-	C26H28O8	486.212	19.81		(None,)	1	-	-	467	504	287	358
(None,)	-	C22H29NO10	485.222	19.08		(None,)	6.6	-	-	677	452	529	412
(None,)	-	C25H22N8O2	484.224	21.17		(None,)	3.3	-	-	154	168	139	162
(None,)	-	C23H50N2O5P	483.377	21.83		(None,)	4.7	-	-	4020	4030	4150	3900
(None,)	-	C20H18O14	483.067	17.41		(None,)	1	-	-	161	175	126	142
(None,)	-	C27H28O7	482.226	18.8		(None,)	2.1	-	-	695	407	479	604
(None,)	-	C19H33N3O8S	481.228	17.6		(None,)	1	-	-	705	614	642	415
(None,)	-	C26H38O5S	480.281	18.2		(None,)	6.1	-	-	11900	10900	9570	10300
(None,)	-	C24H30O9	480.219	18.42		(None,)	6.3	-	-	438	338	306	311
(None,)	-	C14H27N2O13P	480.158	20.93		(None,)	2	-	-	604	614	658	696
(None,)	-	C33H50O2	479.391	21.07		(None,)	6.5	-	-	2770	2770	2610	2410
(None,)	-	C29H37N3O2	477.323	19.45		(None,)	1.1	-	-	7410	7600	4350	3310
(None,)	-	C29H36N2O4	477.277	18.23		(None,)	2.7	-	-	11000	11300	10000	10900
(None,)	-	C25H25N5O4	477.226	19.55		(None,)	2.3	-	-	844	549	303	346
(None,)	-	C19H24O14	477.124	21.8		(None,)	2.6	-	-	73.2	79.6	81.5	74.7
(None,)	-	C30H34O4	476.284	18.59		(None,)	1.4	-	-	19100	19100	16800	16700
(None,)	-	C24H33N3O3S2	476.203	25		(None,)	1.5	-	-	105	97.6	102	97.7
(None,)	-	C23H27N3O7	475.226	16.2		(None,)	3.1	-	-	1060	1100	996	812
(None,)	-	C24H29N3O6	473.237	16.5		(None,)	0.9	-	-	1780	1710	1710	1370
(None,)	-	C20H21N7O6	473.188	17.83		(None,)	3.5	-	-	4300	4730	4470	4470
(None,)	-	C27H39N3O3	471.326	19.44		(None,)	1.8	-	-	4790	4840	3450	2800
(None,)	-	C17H31N3O11	471.228	16.78		(None,)	1.4	-	-	2110	1960	1910	1980
(None,)	-	C23H32O7S	470.224	18.7		(None,)	6.5	-	-	1210	544	641	699
(None,)	-	C26H37N5O2	469.33	23.83		(None,)	0.7	-	-	845	838	839	731
(None,)	-	C30H49N3O	468.39	20.18		(None,)	8.9	-	-	673000	630000	671000	650000
(None,)	-	C21H38O10	468.278	18.27		(None,)	2.8	-	-	7950	7780	6310	6810
(None,)	-	C20H36O7P2	468.224	18.5		(None,)	2.5	-	-	990	1090	713	469
(None,)	-	C21H36O10	466.264	16.85		(None,)	0.3	-	-	12000	12500	7610	8580
(None,)	-	C25H28N2O4Si	466.214	18.63		(None,)	1.2	-	-	1200	536	354	371
(None,)	-	C30H38O3	464.315	19.41		(None,)	3.1	-	-	46400	56000	40300	29700
(None,)	-	C14H27N2O13P	463.131	20.95		(None,)	1.6	-	-	1460	1450	1830	1890
(None,)	-	C30H36O4	461.28	18.06		(None,)	6.4	-	-	2460	2530	4210	4500
(None,)	-	C16H12O12S2	460.989	23.47		(None,)	7.9	-	-	297	257	282	237
(None,)	-	C25H46O6	460.357	21.42		(None,)	0.1	-	-	7550	7110	7840	7250
(None,)	-	C21H35N3O7	459.272	19.39		(None,)	3.7	-	-	5420	5340	2770	2440
(None,)	-	C23H38O9	459.244	17.22		(None,)	0.8	-	-	6440	5950	5660	5380
(None,)	-	C28H44N2O2	458.358	20.98		(None,)	2.8	-	-	5000	5200	4780	4660
(None,)	-	C25H28O7	458.22	18.2		(None,)	1.8	-	-	1200	647	491	510
(None,)	-	C26H33NO5	457.274	23.27		(None,)	8.3	-	-	742	760	841	742
(None,)	-	C22H28N6O3S	457.206	17.5		(None,)	4.7	-	-	3420	3690	3340	3010
(None,)	-	C27H34O5	456.274	18		(None,)	0.4	-	-	2560	2550	1780	1730
(None,)	-	C26H34AlO4	455.247	17.22		(None,)	4.3	-	-	3390	2490	2410	1920
(None,)	-	C23H24N4O6	453.178	18.68		(None,)	5.8	-	-	2200	1930	1770	1840
(None,)	-	C31H46O	452.375	20.81		(None,)	1.7	-	-	60400	55600	42700	40800
(None,)	-	C24H34O5S	452.244	18.12		(None,)	6.5	-	-	135000	134000	102000	109000
(None,)	-	C17H18N5O8P	452.095	18.27		(None,)	1.7	-	-	423	392	383	346
(None,)	-	C22H38N6O4	451.283	18.53		(None,)	2.7	-	-	10400	4560	3030	2860
(None,)	-	C25H36O6	450.283	19.1		(None,)	3.4	-	-	9210	9010	6740	5660
(None,)	-	C23H28O8	450.214	19.38		(None,)	1.9	-	-	957	799	303	544
(None,)	-	C24H30O7	448.217	16.94		(None,)	3.6	-	-	125	185	338	643
(None,)	-	C22H38CuO4	447.238	16.64		(None,)	0.1	-	-	1210	1400	687	909
(None,)	-	C24H32N2O5	446.276	18.7		(None,)	1.2	-	-	5840	7560	5140	4970
(None,)	-	C20H37NaO7S	445.206	18.67		(None,)	3.5	-	-	1090	840	978	1900
(None,)	-	C28H27NO3	443.233	17.06		(None,)	1.8	-	-	2880	2770	2040	2110
(None,)	-	C24H28N2O5	442.23	16.53		(None,)	3.5	-	-	735	777	952	1990
(None,)	-	C29H43O2	441.357	21.82		(None,)	4.6	-	-	5680	4710	5010	6650
(None,)	-	C17H25N7O6	441.218	17.4		(None,)	4.7	-	-	2730	2540	2900	2450
(None,)	-	C27H53NO3	440.408	23.86		(None,)	0.8	-	-	2280	2140	2310	2130
(None,)	-	C15H38N2O9S	440.269	18.35		(None,)	0.4	-	-	2160	2680	2850	2580
(None,)	-	C26H35N3O2	439.301	19.4		(None,)	2.1	-	-	3630	3380	2700	2130
(None,)	-	C22H32N2O6	438.255	16.96		(None,)	3.2	-	-	9090	9130	6830	6680
(None,)	-	C22H21N5O4	437.197	18.69		(None,)	2.1	-	-	1280	1290	1160	1100
(None,)	-	C18H12O11S	437.021	20.9		(None,)	3.6	-	-	103	115	111	101
(None,)	-	C24H34O4S	436.255	17.42		(None,)	5.5	-	-	64500	67300	47900	52300
(None,)	-	C30H58O	435.454	26.52		(None,)	4.9	-	-	89	89.6	93.8	65.6
(None,)	-	C22H31N3O5	435.264	18.57		(None,)	1.6	-	-	7550	7480	6560	6440
(None,)	-	C23H32N2O5	434.26	18.17		(None,)	3.6	-	-	24500	22700	20900	19500
(None,)	-	C23H32N4O4	429.244	17.5		(None,)	2.6	-	-	2450	2320	1770	2220
(None,)	-	C14H24N2O11S	429.12	17.67		(None,)	4	-	-	310	212	289	224
(None,)	-	C25H30O5	428.246	16.45		(None,)	4.4	-	-	2060	2260	1500	1350
(None,)	-	C28H30N2O2	427.233	17.34		(None,)	1.2	-	-	2800	2720	1110	1640
(None,)	-	C13H22N4O8S2	427.091	28.44		(None,)	3.9	-	-	129	104	116	102
(None,)	-	C13H16N2O9S2	426.06	24.29		(None,)	1.2	-	-	180	81.4	177	81.9
(None,)	-	C18H21N3O4S2	425.132	17.84		(None,)	0.7	-	-	226	189	161	206
(None,)	-	C28H54O	424.453	25.81		(None,)	2.6	-	-	36.6	63.8	33.1	54.3
(None,)	-	C19H34O9	424.254	18.24		(None,)	0.2	-	-	14500	14200	11200	11200
(None,)	-	C22H30O7	424.236	16.98		(None,)	0.5	-	-	2970	3320	3880	838
(None,)	-	C25H43NO3	423.34	21.98		(None,)	1.8	-	-	3270	2820	6550	1610
(None,)	-	C17H37N7O4	421.323	23.28		(None,)	3.3	-	-	6850	6500	6710	6450
(None,)	-	C25H29N3O2	421.248	16.47		(None,)	3.4	-	-	7190	7450	360	8340
(None,)	-	C25H29N3O2	421.262	19.08		(None,)	2.1	-	-	4360	4050	3150	2690
(None,)	-	C31H46	419.365	22.02		(None,)	3	-	-	688	366	328	343
(None,)	-	C20H32O8	418.246	18.58		(None,)	0.4	-	-	12300	12400	6490	6080
(None,)	-	C26H40O4	417.298	20.38		(None,)	5.3	-	-	3650	6350	6800	6700
(None,)	-	C18H29N3O5S	417.221	18.68		(None,)	1.8	-	-	7380	7530	5580	6210
(None,)	-	C26H42N2O	416.367	23.28		(None,)	8.2	-	-	5590	5400	5510	5070
(None,)	-	C15H18N4O7S	416.116	19.01		(None,)	1.3	-	-	217	229	197	208
(None,)	-	C18H28N3O5P	415.213	18.68		(None,)	3.6	-	-	144000	144000	125000	119000
(None,)	-	C24H29NO4	413.241	17.92		(None,)	1.3	-	-	2970	3290	2600	2540
(None,)	-	C10H17N7O8S	413.126	17.22		(None,)	0.4	-	-	139	200	148	213
(None,)	-	C13H16O13S	413.047	18.74		(None,)	0.3	-	-	195	210	178	182
(None,)	-	C25H49NO3	412.38	23.21		(None,)	2.9	-	-	2470	2370	2550	2690
(None,)	-	C25H34N2O2	412.293	19.42		(None,)	0.6	-	-	2820	2900	1540	1180
(None,)	-	C22H32O4S	410.237	16.06		(None,)	2.4	-	-	15600	16300	10200	10800
(None,)	-	C30H48	409.384	0.06		(None,)	1.5	-	-	1680	1360	1190	980
(None,)	-	C30H48	409.378	24.45		(None,)	0.4	-	-	17600	15300	17100	16300
(None,)	-	C19H20O10	409.115	19.19		(None,)	3.4	-	-	187	143	98.8	92.6
(None,)	-	C19H26N4O5	408.223	15.74		(None,)	2	-	-	6820	7980	4700	4480
(None,)	-	C19H18O7S	408.109	25.36		(None,)	3.5	-	-	72.2	71.8	76.6	71.9
(None,)	-	C19H18O10	407.1	21.38		(None,)	5.4	-	-	177	170	143	144
(None,)	-	C16H13N2Na2O6P	407.031	22.72		(None,)	1.6	-	-	37.6	48.5	33.9	33.2
(None,)	-	C30H44	405.353	21.67		(None,)	3.4	-	-	1050	1150	787	825
(None,)	-	C18H37N5O5	404.268	19.28		(None,)	3.1	-	-	13000	11900	3330	3090
(None,)	-	C21H26N2O5	404.218	17.85		(None,)	2.5	-	-	13100	14300	8430	9120
(None,)	-	C21H29N5O2	401.27	20.36		(None,)	3.7	-	-	2380	2090	1910	1920
(None,)	-	C18H20N3NaO3S	399.15	16.84		(None,)	2.2	-	-	545	475	3060	367
(None,)	-	C14H20O10S	398.116	18.39		(None,)	0.5	-	-	171	194	100	188
(None,)	-	C23H27N3O2	395.238	17.74		(None,)	0	-	-	3840	3800	4400	2230
(None,)	-	C19H34O7	392.265	19.56		(None,)	2.9	-	-	6840	6930	2800	2730
(None,)	-	C22H34N2O3	392.289	22.71		(None,)	4.2	-	-	18600	18400	18400	17000
(None,)	-	C17H30N2O7	392.231	17.47		(None,)	0.5	-	-	4050	18300	4060	3710
(None,)	-	C19H34O8	391.233	18.72		(None,)	0	-	-	4970	5010	4240	4070
(None,)	-	C13H15N3O6S2	391.074	22.73		(None,)	0.3	-	-	147	151	158	159
(None,)	-	C23H32O4	390.254	18.67		(None,)	1.9	-	-	3800	3640	5100	1620
(None,)	-	C15H21N3O2S3	389.118	21.18		(None,)	3.9	-	-	204	111	379	471
(None,)	-	C21H25N3O3	385.222	18.79		(None,)	4.4	-	-	4020	3430	8170	3600
(None,)	-	C16H30O9	384.228	18.28		(None,)	2.8	-	-	1650	1650	749	777
(None,)	-	C17H19NO6S	383.129	20.9		(None,)	0.2	-	-	208	221	235	180
(None,)	-	C16H19N3O5S	383.14	26.09		(None,)	3.1	-	-	158	169	186	186
(None,)	-	C24H28O3	382.24	18.43		(None,)	5.2	-	-	2280	2230	1640	1780
(None,)	-	C17H25N5O4	381.223	18.17		(None,)	1.1	-	-	2460	2370	1910	1850
(None,)	-	C24H29NO3	380.221	17.56		(None,)	5.7	-	-	3670	9790	7780	7860
(None,)	-	C22H23N3O2	379.215	18.18		(None,)	5.7	-	-	35400	30900	28700	29700
(None,)	-	C22H18O6	379.13	19.48		(None,)	1	-	-	311	347	41.4	121
(None,)	-	C17H28O8	378.214	18.18		(None,)	0.6	-	-	204000	197000	160000	167000
(None,)	-	C4H12O7Pb	377.036	18.18		(None,)	4.5	-	-	969	879	697	749
(None,)	-	C25H26O2	376.23	17.34		(None,)	2.8	-	-	5130	5940	6430	4340
(None,)	-	C22H28O4	374.222	17.77		(None,)	4.7	-	-	2480	2560	1780	2420
(None,)	-	C25H44N2	373.356	23.41		(None,)	1.5	-	-	66.9	45.8	5.04	67.8
(None,)	-	C20H19NO3S	371.144	18.51		(None,)	4	-	-	898	920	829	834
(None,)	-	C27H44	369.351	35.82		(None,)	0.8	-	-	16500	16700	18600	14300
(None,)	-	C27H44	369.353	37.98		(None,)	2.1	-	-	20500	19800	22800	21100
(None,)	-	C20H14O6	368.122	19.38		(None,)	0	-	-	119	110	73.9	65.1
(None,)	-	C21H23N3O2	367.212	17.42		(None,)	1	-	-	1750	1780	1630	1440
(None,)	-	C12H19N3O7S	367.127	19.31		(None,)	3.6	-	-	223	170	113	117
(None,)	-	C20H23D11O5	366.312	21.3		(None,)	2.9	-	-	2280	1970	2200	1870
(None,)	-	C22H24N2O2	366.215	17.44		(None,)	3.8	-	-	3250	3190	3200	3300
(None,)	-	C12H20N4O6S	366.145	0.62		(None,)	3.3	-	-	333	299	260	203
(None,)	-	C14H18O10	364.126	17.32		(None,)	0.7	-	-	311	289	192	236
(None,)	-	C19H22O5S	363.125	19.73		(None,)	0.6	-	-	245	328	82.5	226
(None,)	-	C18H24N4O3	362.219	17.48		(None,)	0.3	-	-	78400	78600	57600	57600
(None,)	-	C18H24N4O4	361.19	18.11		(None,)	4.2	-	-	4250	4260	3260	3820
(None,)	-	C17H17N3O3S	361.135	19.36		(None,)	4.5	-	-	283	297	148	144
(None,)	-	C25H42	360.357	21.11		(None,)	1.3	-	-	276	271	4070	3720
(None,)	-	C23H46O	356.387	23.88		(None,)	3.8	-	-	901	940	715	610
(None,)	-	C19H28O3S	354.211	16.32		(None,)	1.8	-	-	2190	2260	1180	1220
(None,)	-	C22H24O3	354.204	19.07		(None,)	3.8	-	-	3360	2980	2150	1870
(None,)	-	C19H19N3O2S	354.111	18.12		(None,)	1.1	-	-	167	146	189	519
(None,)	-	C23H42O	352.356	23.57		(None,)	2.5	-	-	3530	3290	2620	2480
(None,)	-	C18H26N2O4	352.208	17.1		(None,)	3.5	-	-	2540	3080	1590	1810
(None,)	-	C11H19NNaO9	350.133	17.61		(None,)	2.4	-	-	473	443	319	333
(None,)	-	C16H17N3O3S	349.132	18.55		(None,)	0.4	-	-	372	384	281	320
(None,)	-	C21H35N3	347.314	21.5		(None,)	7	-	-	23500	21800	19000	14300
(None,)	-	C16H27NO6	347.216	19.34		(None,)	0.5	-	-	1150	1260	1030	832
(None,)	-	C24H24O	346.22	17.23		(None,)	6.3	-	-	3480	6490	3160	2830
(None,)	-	C18H21N3O3	345.191	17.9		(None,)	0.8	-	-	5640	5600	3830	4140
(None,)	-	C20H23D7O3	343.294	22.08		(None,)	2.6	-	-	8700	8250	8340	7920
(None,)	-	C12H20O11	341.119	19.21		(None,)	0.9	-	-	202	165	465	278
(None,)	-	C12H9N2O8P	341.017	22.53		(None,)	0	-	-	162	160	173	142
(None,)	-	C22H45NO	340.355	23.55		(None,)	3.6	-	-	1220	1050	1360	1330
(None,)	-	C13H21O7P	338.138	17.98		(None,)	3.4	-	-	3550	3780	2830	2680
(None,)	-	C20H21N3O	337.208	19.45		(None,)	1.7	-	-	2290	2410	1740	2050
(None,)	-	C21H36NO	336.313	20.68		(None,)	0.3	-	-	151000	148000	111000	111000
(None,)	-	C16H22N4O3	336.202	16.41		(None,)	0.9	-	-	12200	24900	6470	7550
(None,)	-	C15H17N3O6	336.119	18.61		(None,)	0.2	-	-	104	314	85.9	177
(None,)	-	C24H46	335.367	22.57		(None,)	0.7	-	-	36.8	33.7	178	167
(None,)	-	C17H33NO5	332.241	18.61		(None,)	4.6	-	-	3560	3530	2740	2420
(None,)	-	C16H26O6	332.204	20.9		(None,)	4.7	-	-	913	872	950	898
(None,)	-	C15H14N4O2S	332.105	18.73		(None,)	0.9	-	-	106	248	182	195
(None,)	-	C19H23NO3	331.202	17.33		(None,)	1	-	-	1280	1550	1130	1200
(None,)	-	C24H24	330.224	22.89		(None,)	4.9	-	-	3200	3030	3110	3490
(None,)	-	C13H21N5O4	329.2	18.01		(None,)	0.3	-	-	4150	4100	2670	3190
(None,)	-	C12H24N2O7	326.206	18.72		(None,)	0.5	-	-	3070	3090	2470	2440
(None,)	-	C15H16O7	326.131	19.35		(None,)	2.1	-	-	188	217	83.1	102
(None,)	-	C21H38O	324.326	22.83		(None,)	1	-	-	2770	2530	3500	3370
(None,)	-	C12H18O9	324.13	19.09		(None,)	0.2	-	-	180	199	109	111
(None,)	-	C11H20N3O3PS	323.134	18.91		(None,)	2.1	-	-	291	289	255	256
(None,)	-	C21H27N3	322.23	18.94		(None,)	5.8	-	-	3640	3770	1960	1660
(None,)	-	C18H27NO2S	322.186	15.93		(None,)	7.4	-	-	2450	2840	1370	1570
(None,)	-	C15H19N3O5	322.142	17.31		(None,)	4	-	-	800	670	462	448
(None,)	-	C11H22N6O4	320.206	18.39		(None,)	5.4	-	-	2960	3010	2230	2340
(None,)	-	C15H17N3O5	320.123	16.96		(None,)	1.8	-	-	228	234	214	205
(None,)	-	C21H36NO	319.286	20.8		(None,)	1.3	-	-	100000	77600	95200	92300
(None,)	-	C16H15NO5	319.126	18.79		(None,)	0.3	-	-	348	822	258	250
(None,)	-	C16H20N4O2	318.192	16.74		(None,)	0.9	-	-	15700	16500	10300	10900
(None,)	-	C11H21O7P	314.14	16.95		(None,)	4.4	-	-	816	859	444	493
(None,)	-	C21H42	312.361	21.38		(None,)	0.4	-	-	165	171	166	172
(None,)	-	C14H14O7	312.107	18.93		(None,)	0.1	-	-	166	146	163	140
(None,)	-	C14H32N2O4	310.271	20.17		(None,)	0.4	-	-	563	333	557	221
(None,)	-	C19H21N3	309.207	19.38		(None,)	2.6	-	-	5900	6110	9430	7190
(None,)	-	C14H26O6	308.206	17.21		(None,)	1.1	-	-	1060	1230	558	1060
(None,)	-	C10H20N6O4	306.191	15.73		(None,)	6.6	-	-	1580	1840	1090	981
(None,)	-	C16H21N3O2	305.196	19.42		(None,)	2	-	-	10300	9510	1890	2140
(None,)	-	C16H15O5	305.122	18.05		(None,)	3.4	-	-	350	339	358	216
(None,)	-	C14H25NO6	304.176	18.58		(None,)	0	-	-	6110	5890	4770	4760
(None,)	-	C10H21N5O4	293.181	20.08		(None,)	4.9	-	-	2090	2290	1680	1610
(None,)	-	C11H22N3O3P	293.175	23.26		(None,)	4.8	-	-	1050	1130	984	956
(None,)	-	C15H14O3S	292.103	23.37		(None,)	8.7	-	-	286	196	136	289
(None,)	-	C15H23N5	291.238	20.49		(None,)	3.9	-	-	2090	1070	1410	2140
(None,)	-	C14H27NO5	290.195	17.03		(None,)	2.3	-	-	1130	1230	699	718
(None,)	-	C10H20N6O4	289.15	18.82		(None,)	1.2	-	-	2740	373	1740	1690
(None,)	-	C13H13N5O2	289.144	21.15		(None,)	0.8	-	-	533	552	578	586
(None,)	-	C18H32D2O2	285.279	27.23		(None,)	0.4	-	-	3060	2950	3480	3190
(None,)	-	C9H17N3O6	281.159	19		(None,)	1.7	-	-	1740	1850	1610	1700
(None,)	-	C9H12O10	281.042	20.94		(None,)	0.5	-	-	41.9	35	40	47
(None,)	-	C12H11N3O4	279.105	19.24		(None,)	3	-	-	1060	1020	682	654
(None,)	-	C12H22N2O4	276.194	17.89		(None,)	4.4	-	-	620	490	511	562
(None,)	-	C17H22O3	275.165	23.3		(None,)	1.6	-	-	4520	4270	4490	4380
(None,)	-	C10H15N3O5	275.136	18.06		(None,)	1.2	-	-	258	258	694	338
(None,)	-	C20H32	273.258	22.59		(None,)	0.1	-	-	495	458	427	375
(None,)	-	C20H32	273.258	28.68		(None,)	0.7	-	-	843	828	835	675
(None,)	-	C9H13N5O4	273.113	19.95		(None,)	1.1	-	-	392	195	250	269
(None,)	-	C19H26O	271.207	21.47		(None,)	3.8	-	-	2470	2340	1570	1490
(None,)	-	C14H30O3	264.247	20.52		(None,)	0.4	-	-	31.6	11.6	49.7	22.2
(None,)	-	C13H25NO3	261.217	20.69		(None,)	0	-	-	1080	914	791	932
(None,)	-	C9H17N5OS	261.151	22.72		(None,)	4.1	-	-	1480	1690	1650	1460
(None,)	-	C16H34O2	259.262	21.36		(None,)	3.4	-	-	23.5	30.3	197	179
(None,)	-	C8H10O7S	251.021	18.21		(None,)	2.2	-	-	831	852	619	613
(None,)	-	C13H12O2S	250.092	21.16		(None,)	1.8	-	-	533	536	645	623
(None,)	-	C17H26O	247.206	20.85		(None,)	0.7	-	-	573	673	1980	1850
(None,)	-	C13H22O3	244.191	16.78		(None,)	0	-	-	1210	1270	528	573
(None,)	-	C13H22O3	244.192	21.98		(None,)	2.9	-	-	1500	1500	3250	3570
(None,)	-	C12H19N2O2	241.18	19.35		(None,)	0.4	-	-	866	604	482	541
(None,)	-	C17H32	237.258	22		(None,)	0.5	-	-	48.2	43.6	163	156
(None,)	-	C12H10N2S	232.085	21.18		(None,)	1	-	-	85.2	86.5	80.9	91.4
(None,)	-	C15H14O	228.137	19.37		(None,)	4.9	-	-	154	147	103	77.8
(None,)	-	C13H11N3	227.129	16.96		(None,)	2.1	-	-	1090	1340	736	757
(None,)	-	C13H20O2	226.181	16.78		(None,)	0	-	-	1620	1670	835	877
(None,)	-	C16H32	225.258	22.16		(None,)	0.6	-	-	37.5	36.4	66.7	65.2
(None,)	-	C16H32	225.258	28.11		(None,)	0.3	-	-	22.7	25.9	22.1	20.4
(None,)	-	C13H17NO	221.163	20.15		(None,)	0.6	-	-	199	168	188	197
(None,)	-	C13H16O3	221.118	19.42		(None,)	3.6	-	-	34600	34000	12700	10900
(None,)	-	C16H24	217.196	25.36		(None,)	0.2	-	-	479	454	523	433
(None,)	-	C8H8O7	217.036	20.49		(None,)	1.4	-	-	26.3	19	15.9	19.9
(None,)	-	C7H10O5S	207.032	18.01		(None,)	1	-	-	53.9	53.2	87.8	86
(None,)	-	C15H24	205.195	25.37		(None,)	2.2	-	-	319	304	304	317
(E)-6,10-Dimethyl-9-methylene-5-undecen-2-one	(E)-6,10-Dimethyl-9-methylene-5-undecen-2-one	C14H24O	226.216	20.2		Fatty Acyls [FA]	1	0.06	0.912	239	230	139	98.7
( WE 40:3 , WE 40:3 , WE 40:3 )	-	C40H74O2	604.598	29.74	FA	Fatty Acyls [FA]	6.9	-	-	2680	2570	2610	2420
( WE 40:3 , WE 40:3 , WE 40:3 )	-	C40H74O2	604.599	33.38	FA	Fatty Acyls [FA]	4.4	-	-	2850	2830	2990	2840
( WE 40:2 , WE 40:2 )	-	C40H76O2	589.587	34.65	FA	Fatty Acyls [FA]	5.9	-	-	1280	1290	1280	1170
( WE 40:1 , WE 40:1 , WE 40:1 )	-	C40H78O2	608.631	36.41	FA	Fatty Acyls [FA]	3.8	-	-	5810	5900	5950	5430
( WE 39:1 ,)	-	C39H76O2	594.616	35.13	FA	Fatty Acyls [FA]	2.8	-	-	6110	6480	6650	6100
( WE 38:3 , WE 38:3 , FA 38:3 , FA 38:3 , FA 38:3 , FA 38:3 , FA 38:3 )	-	C38H70O2	576.568	31.85	FA	Fatty Acyls [FA]	4.7	-	-	4320	4610	4600	4420
( WE 38:2 , WE 38:2 )	-	C38H72O2	561.555	29.26	FA	Fatty Acyls [FA]	8.6	-	-	3540	3720	3370	3140
( WE 38:2 , WE 38:2 )	-	C38H72O2	561.557	32.94	FA	Fatty Acyls [FA]	5.4	-	-	3270	3320	3660	3390
( WE 38:1 , WE 38:1 , WE 38:1 , WE 38:1 )	-	C38H74O2	563.572	34.46	FA	Fatty Acyls [FA]	5	-	-	2870	3100	3240	2850
( WE 37:1 ,)	-	C37H72O2	566.588	29.59	FA	Fatty Acyls [FA]	0.5	-	-	11700	10900	11300	10600
( WE 37:1 ,)	-	C37H72O2	566.585	33.28	FA	Fatty Acyls [FA]	1.8	-	-	12700	12500	14300	12500
( WE 37:1 ,)	-	C37H72O2	549.556	33.31	FA	Fatty Acyls [FA]	7.1	-	-	4650	4950	5120	4540
( WE 36:3 , WE 36:3 , WE 36:3 , WE 36:3 , FA 36:3 , FA 36:3 , FA 36:3 , FA 36:3 , FA 36:3 )	-	C36H66O2	548.538	30.46	FA	Fatty Acyls [FA]	2.1	-	-	6580	6200	6550	5970
( WE 36:3 , WE 36:3 , WE 36:3 , WE 36:3 , FA 36:3 , FA 36:3 , FA 36:3 , FA 36:3 , FA 36:3 )	-	C36H66O2	531.508	30.46	FA	Fatty Acyls [FA]	8.3	-	-	1690	1530	1640	1390
( WE 36:2 , WE 36:2 , WE 36:2 , FA 36:2 , FA 36:2 )	-	C36H68O2	533.525	27.45	FA	Fatty Acyls [FA]	6.4	-	-	7230	7020	7030	6560
( WE 36:2 , WE 36:2 , WE 36:2 , FA 36:2 , FA 36:2 )	-	C36H68O2	533.527	31.4	FA	Fatty Acyls [FA]	3.5	-	-	7690	7520	8430	7280
( WE 36:1 , WE 36:1 , WE 36:1 , WE 36:1 , WE 36:1 , WE 36:1 , WE 36:1 , FA 36:1 )	-	C36H70O2	535.542	32.72	FA	Fatty Acyls [FA]	4.3	-	-	6930	7150	7440	6750
( WE 35:1 , FA 35:1 )	-	C35H68O2	538.553	27.87	FA	Fatty Acyls [FA]	5.4	-	-	13700	13600	13400	13500
( WE 35:1 , FA 35:1 )	-	C35H68O2	538.554	31.65	FA	Fatty Acyls [FA]	3.1	-	-	15000	15400	16500	14000
( WE 35:1 , FA 35:1 )	-	C35H68O2	521.526	31.71	FA	Fatty Acyls [FA]	5.5	-	-	5520	6020	6290	5490
( WE 34:3 , WE 34:3 , WE 34:3 , WE 34:3 , FA 34:3 , FA 34:3 , FA 34:3 , FA 34:3 , FA 34:3 )	-	C34H62O2	520.507	29.24	FA	Fatty Acyls [FA]	3.5	-	-	2300	2260	2350	2120
( WE 34:2 , WE 34:2 , WE 34:2 , WE 34:2 , FA 34:2 , FA 34:2 )	-	C34H64O2	505.496	30.06	FA	Fatty Acyls [FA]	3.2	-	-	4410	4660	4840	4190
( WE 33:1 , FA 33:1 )	-	C33H64O2	510.524	30.27	FA	Fatty Acyls [FA]	0	-	-	19500	19500	20900	18000
( WE 33:1 , FA 33:1 )	-	C33H64O2	493.497	30.28	FA	Fatty Acyls [FA]	1.1	-	-	9820	11000	10800	9840
( WE 32:2 , WE 32:2 , WE 32:2 , WE 32:2 , WE 32:2 , FA 32:2 , FA 32:2 )	-	C32H60O2	494.492	28.94	FA	Fatty Acyls [FA]	2.2	-	-	3360	2970	3120	2850
( WE 32:2 , WE 32:2 , WE 32:2 , WE 32:2 , WE 32:2 , FA 32:2 , FA 32:2 )	-	C32H60O2	477.463	28.97	FA	Fatty Acyls [FA]	6.9	-	-	1500	1370	1470	1270
( WE 24:2;O4 , WE 24:2;O4 )	-	C24H44O6	446.346	21.35	FA	Fatty Acyls [FA]	3.3	-	-	5140	4510	5110	4640
( WE 24:2;O4 , WE 24:2;O4 )	-	C24H44O6	429.325	20.95	FA	Fatty Acyls [FA]	1.6	-	-	11900	12500	2290	11000
( WD 42:1;O2 ,)	-	C42H82O4	668.661	29.57	FA	Fatty Acyls [FA]	0.1	-	-	4240	4090	4390	3460
( TG 64:15 , TG 64:15 , TG 64:15 , TG 64:15 )	-	C67H100O6	1018.78	49.27	TAG	Glycerolipids [GL]	2.5	-	-	3450	3430	3530	3010
( TG 61:8 , TG 61:8 , TG 61:8 , TG 61:8 , TG 61:8 , TG 61:8 , TG 61:8 , TG 61:8 , TG 61:8 , TG 61:8 , TG 61:8 , TG 61:8 , TG 61:8 , TG 61:8 , TG 61:8 , TG 61:8 , TG 61:8 , TG 61:8 , TG 61:8 , TG 61:8 , TG 61:8 , TG 61:8 , TG 61:8 , TG 61:8 , TG 61:8 , TG 61:8 , TG 61:8 )	-	C64H108O6	990.842	25.35	TAG	Glycerolipids [GL]	0.9	-	-	1060	1050	952	729
( TG 61:13 , TG 61:13 )	-	C64H98O6	980.772	47.27	TAG	Glycerolipids [GL]	0.5	-	-	2230	2310	2350	2110
( TG 60:11 , TG 60:11 , TG 60:11 , TG 60:11 , TG 60:11 , TG 60:11 , TG 60:11 , TG 60:11 , TG 60:11 , TG 60:11 , TG 60:11 , TG 60:11 , TG 60:11 , TG 60:11 , TG 60:11 , TG 60:11 , TG 60:11 , TG 60:11 , TG 60:11 , TG 60:11 , TG 60:11 , TG 60:11 , TG 60:11 , TG 60:11 , TG 60:11 , TG 60:11 )	-	C63H100O6	953.769	32.3	TAG	Glycerolipids [GL]	7.8	-	-	3060	2940	3890	3490
( TG 59:4 , TG 59:4 , TG 59:4 , TG 59:4 , TG 59:4 , TG 59:4 , TG 59:4 , TG 59:4 , TG 59:4 , TG 59:4 , TG 59:4 , TG 59:4 , TG 59:4 , TG 59:4 , TG 59:4 , TG 59:4 , TG 59:4 , TG 59:4 , TG 59:4 , TG 59:4 , TG 59:4 , TG 59:4 , TG 59:4 , TG 59:4 , TG 59:4 , TG 59:4 , TG 59:4 , TG 59:4 , TG 59:4 , TG 59:4 , TG 59:4 , TG 59:4 , TG 59:4 , TG 59:4 , TG 59:4 , TG 59:4 , TG 59:4 , TG 59:4 , TG 59:4 , TG 59:4…	-	C62H112O6	970.869	25.22	TAG	Glycerolipids [GL]	3.2	-	-	395	287	362	269
( TG 58:10 , TG 58:10 , TG 58:10 , TG 58:10 , TG 58:10 , TG 58:10 , TG 58:10 , TG 58:10 , TG 58:10 , TG 58:10 , TG 58:10 , TG 58:10 , TG 58:10 , TG 58:10 , TG 58:10 , TG 58:10 , TG 58:10 , TG 58:10 , TG 58:10 , TG 58:10 , TG 58:10 , TG 58:10 , TG 58:10 , TG 58:10 , TG 58:10 , TG 58:10 , TG 58:10 , TG 58:10 , TG 58:10 , TG 58:10 , TG 58:10 , TG 58:10 , TG 58:10 , TG 58:10 )	-	C61H98O6	944.763	45.37	TAG	Glycerolipids [GL]	7.3	-	-	3550	3470	3490	3020
( TG 57:6 , TG 57:6 , TG 57:6 , TG 57:6 , TG 57:6 , TG 57:6 , TG 57:6 , TG 57:6 , TG 57:6 , TG 57:6 , TG 57:6 , TG 57:6 , TG 57:6 , TG 57:6 , TG 57:6 , TG 57:6 , TG 57:6 , TG 57:6 , TG 57:6 , TG 57:6 , TG 57:6 , TG 57:6 , TG 57:6 , TG 57:6 , TG 57:6 , TG 57:6 , TG 57:6 , TG 57:6 , TG 57:6 , TG 57:6 , TG 57:6 , TG 57:6 , TG 57:6 , TG 57:6 , TG 57:6 , TG 57:6 , TG 57:6 , TG 57:6 , TG 57:6 , TG 57:6…	-	C60H104O6	938.812	37.33	TAG	Glycerolipids [GL]	2.8	-	-	1710	1720	2410	1670
( TG 56:4 , TG 56:4 , TG 56:4 , TG 56:4 , TG 56:4 , TG 56:4 , TG 56:4 , TG 56:4 , TG 56:4 , TG 56:4 , TG 56:4 , TG 56:4 , TG 56:4 , TG 56:4 , TG 56:4 , TG 56:4 , TG 56:4 , TG 56:4 , TG 56:4 , TG 56:4 , TG 56:4 , TG 56:4 , TG 56:4 , TG 56:4 , TG 56:4 , TG 56:4 , TG 56:4 , TG 56:4 , TG 56:4 , TG 56:4 , TG 56:4 , TG 56:4 , TG 56:4 , TG 56:4 , TG 56:4 , TG 56:4 , TG 56:4 , TG 56:4 , TG 56:4 , TG 56:4…	-	C59H106O6	928.828	38.75	TAG	Glycerolipids [GL]	3	-	-	6660	6860	6920	6440
( TG 53:1 , TG 53:1 , TG 53:1 , TG 53:1 , TG 53:1 , TG 53:1 , TG 53:1 , TG 53:1 , TG 53:1 , TG 53:1 , TG 53:1 , TG 53:1 , TG 53:1 , TG 53:1 , TG 53:1 , TG 53:1 , TG 53:1 , TG 53:1 , TG 53:1 , TG 53:1 , TG 53:1 , TG 53:1 , TG 53:1 , TG 53:1 , TG 53:1 , TG 53:1 , TG 53:1 , TG 53:1 , TG 53:1 , TG 53:1 , TG 53:1 , TG 53:1 , TG 53:1 , TG 53:1 , TG 53:1 , TG 53:1 )	-	C56H106O6	892.822	39.17	TAG	Glycerolipids [GL]	3.6	-	-	2650	2510	2940	2710
( TG 49:0 , TG 49:0 , TG 49:0 , TG 49:0 , TG 49:0 , TG 49:0 , TG 49:0 , TG 49:0 , TG 49:0 , TG 49:0 , TG 49:0 , TG 49:0 , TG 49:0 , TG 49:0 , TG 49:0 , TG 49:0 , TG 49:0 )	-	C52H100O6	838.782	37.07	TAG	Glycerolipids [GL]	2.7	-	-	6270	6280	7330	6630
( TG 48:1 , TG 48:1 , TG 48:1 , TG 48:1 , TG 48:1 , TG 48:1 , TG 48:1 , TG 48:1 , TG 48:1 , TG 48:1 , TG 48:1 , TG 48:1 , TG 48:1 , TG 48:1 , TG 48:1 , TG 48:1 , TG 48:1 , TG 48:1 , TG 48:1 , TG 48:1 , TG 48:1 , TG 48:1 , TG 48:1 , TG 48:1 , TG 48:1 , TG 48:1 , TG 48:1 , TG 48:1 , TG 48:1 , TG 48:1 , TG 48:1 , TG 48:1 )	-	C51H96O6	822.751	31.41	TAG	Glycerolipids [GL]	3.6	-	-	12300	4890	6730	7640
( TG 47:1 , TG 47:1 , TG 47:1 , TG 47:1 , TG 47:1 , TG 47:1 , TG 47:1 , TG 47:1 , TG 47:1 , TG 47:1 , TG 47:1 , TG 47:1 , TG 47:1 , TG 47:1 , TG 47:1 , TG 47:1 , TG 47:1 , TG 47:1 , TG 47:1 , TG 47:1 , TG 47:1 , TG 47:1 , TG 47:1 , TG 47:1 , TG 47:1 , TG 47:1 , TG 47:1 )	-	C50H94O6	808.736	30.62	TAG	Glycerolipids [GL]	2.7	-	-	15400	13300	14200	14400
( TG 47:0 , TG 47:0 , TG 47:0 , TG 47:0 , TG 47:0 , TG 47:0 , TG 47:0 , TG 47:0 , TG 47:0 , TG 47:0 , TG 47:0 , TG 47:0 , TG 47:0 , TG 47:0 , TG 47:0 )	-	C50H96O6	810.751	35.22	TAG	Glycerolipids [GL]	2	-	-	11800	12600	12600	11900
( TG 45:0 , TG 45:0 , TG 45:0 , TG 45:0 , TG 45:0 , TG 45:0 , TG 45:0 , TG 45:0 , TG 45:0 , TG 45:0 , TG 45:0 , TG 45:0 )	-	C48H92O6	782.718	29.75	TAG	Glycerolipids [GL]	5.3	-	-	7790	7250	6750	6800
( TG 45:0 , TG 45:0 , TG 45:0 , TG 45:0 , TG 45:0 , TG 45:0 , TG 45:0 , TG 45:0 , TG 45:0 , TG 45:0 , TG 45:0 , TG 45:0 )	-	C48H92O6	782.72	33.56	TAG	Glycerolipids [GL]	2.3	-	-	11500	11400	11100	10300
( TG 44:1 , TG 44:1 , TG 44:1 , TG 44:1 , TG 44:1 , TG 44:1 , TG 44:1 , TG 44:1 , TG 44:1 , TG 44:1 , TG 44:1 , TG 44:1 , TG 44:1 , TG 44:1 , TG 44:1 , TG 44:1 )	-	C47H88O6	766.686	27.98	TAG	Glycerolipids [GL]	6.8	-	-	8420	8370	8690	8490
( TG 44:1 , TG 44:1 , TG 44:1 , TG 44:1 , TG 44:1 , TG 44:1 , TG 44:1 , TG 44:1 , TG 44:1 , TG 44:1 , TG 44:1 , TG 44:1 , TG 44:1 , TG 44:1 , TG 44:1 , TG 44:1 )	-	C47H88O6	766.689	31.97	TAG	Glycerolipids [GL]	3	-	-	8920	9910	9730	8740
( TG 44:0 , TG 44:0 , TG 44:0 , TG 44:0 , TG 44:0 , TG 44:0 , TG 44:0 , TG 44:0 , TG 44:0 , TG 44:0 )	-	C47H90O6	768.711	28.5	TAG	Glycerolipids [GL]	2.5	-	-	5630	5410	5870	5400
( TG 43:0 , TG 43:0 , TG 43:0 , TG 43:0 , TG 43:0 , TG 43:0 , TG 43:0 , TG 43:0 )	-	C46H88O6	754.688	32.07	TAG	Glycerolipids [GL]	4.3	-	-	4670	4910	4760	4490
( TG 42:0 , TG 42:0 , TG 42:0 , TG 42:0 , TG 42:0 , TG 42:0 , TG 42:0 )	-	C45H86O6	740.672	31.44	TAG	Glycerolipids [GL]	4.9	-	-	3930	4520	4370	4090
( TG 41:0 , TG 41:0 , TG 41:0 , TG 41:0 , TG 41:0 )	-	C44H84O6	726.657	30.72	TAG	Glycerolipids [GL]	3.2	-	-	2620	2470	2630	2430
( TG 40:0 , TG 40:0 , TG 40:0 , TG 40:0 )	-	C43H82O6	712.648	30.32	TAG	Glycerolipids [GL]	3.8	-	-	3280	3440	3350	3240
( TG 39:0 , TG 39:0 , TG 39:0 )	-	C42H80O6	698.635	27.35	TAG	Glycerolipids [GL]	5.7	-	-	2140	1890	2130	1820
( ST 32:6;O9 ,)	-	C32H46O9	592.348	18.8	ST	Sterol Lipids [ST]	0.5	-	-	25200	6140	20600	20500
( ST 31:2;O3 ,)	-	C31H52O3	490.425	0.06	ST	Sterol Lipids [ST]	0.5	-	-	598	580	458	365
( ST 31:2;O3 ,)	-	C31H52O3	490.427	23.62	ST	Sterol Lipids [ST]	1.6	-	-	2080	1920	1940	1840
( ST 31:2;O3 ,)	-	C31H52O3	490.424	25.75	ST	Sterol Lipids [ST]	1.8	-	-	4230	4350	4140	3990
( ST 31:2;O3 ,)	-	C31H52O3	473.399	25.77	ST	Sterol Lipids [ST]	0.3	-	-	1530	1600	1590	1490
( ST 30:4;O7;Hex ,)	-	C36H56O12	681.389	19.15	ST	Sterol Lipids [ST]	5.2	-	-	13200	8110	10300	9390
( ST 30:3;O , ST 30:3;O , ST 30:3;O )	-	C30H48O	442.407	25.1	ST	Sterol Lipids [ST]	4.9	-	-	4730	4440	4740	4460
( ST 30:2;O3 , ST 30:2;O3 , ST 30:2;O3 )	-	C30H50O3	476.407	22.52	ST	Sterol Lipids [ST]	4.7	-	-	4370	4290	3900	3920
( ST 30:2;O , ST 30:2;O , ST 30:2;O , ST 30:2;O , ST 30:2;O , ST 30:2;O , ST 30:2;O , ST 30:2;O , ST 30:2;O , ST 30:2;O , ST 30:2;O , ST 30:2;O , ST 30:2;O , ST 30:2;O , ST 30:2;O , ST 30:2;O , ST 30:2;O , ST 30:2;O , ST 30:2;O , ST 30:2;O , ST 30:2;O , ST 30:2;O , ST 30:2;O , ST 30:2;O , ST 30:2;O , ST 30:2;O , ST 30:2;O )	-	C30H50O	444.42	0.06	ST	Sterol Lipids [ST]	0.6	-	-	1620	1420	1150	900
( ST 30:2;O , ST 30:2;O , ST 30:2;O , ST 30:2;O , ST 30:2;O , ST 30:2;O , ST 30:2;O , ST 30:2;O , ST 30:2;O , ST 30:2;O , ST 30:2;O , ST 30:2;O , ST 30:2;O , ST 30:2;O , ST 30:2;O , ST 30:2;O , ST 30:2;O , ST 30:2;O , ST 30:2;O , ST 30:2;O , ST 30:2;O , ST 30:2;O , ST 30:2;O , ST 30:2;O , ST 30:2;O , ST 30:2;O , ST 30:2;O )	-	C30H50O	427.394	0.06	ST	Sterol Lipids [ST]	0.6	-	-	2020	1780	1440	1190
( ST 29:6;O4 ,)	-	C29H40O4	470.33	19.44	ST	Sterol Lipids [ST]	5.5	-	-	20600	19900	12100	9600
( ST 29:3;O4 , ST 29:3;O4 , ST 29:3;O4 )	-	C29H46O4	476.374	21.54	ST	Sterol Lipids [ST]	1	-	-	11100	10500	10700	10700
( ST 28:4;O3 , ST 28:4;O3 , ST 28:4;O3 , ST 28:4;O3 , ST 28:4;O3 )	-	C28H42O3	427.317	21.36	ST	Sterol Lipids [ST]	2.8	-	-	3500	3130	3250	3230
( ST 27:3;O4;GlcA ,)	-	C33H50O10	607.349	19.1	ST	Sterol Lipids [ST]	1.8	-	-	11400	11100	9440	9000
( ST 27:2;O4 , ST 27:2;O4 , ST 27:2;O4 , ST 27:2;O4 , ST 27:2;O4 , ST 27:2;O4 , ST 27:2;O4 , ST 27:2;O4 , ST 27:2;O4 , ST 27:2;O4 , ST 27:2;O4 , ST 27:2;O4 , ST 27:2;O4 , ST 27:2;O4 , ST 27:2;O4 , ST 28:1;O4 , ST 27:2;O4 , ST 27:2;O4 , ST 27:2;O4 , ST 27:2;O4 , ST 27:2;O4 , ST 27:2;O4 , ST 27:2;O4 , ST 27:2;O4 , ST 27:2;O4 )	-	C27H44O4	450.36	23.55	ST	Sterol Lipids [ST]	3.2	-	-	2060	2160	2080	2060
( ST 27:2;O4 , ST 27:2;O4 , ST 27:2;O4 , ST 27:2;O4 , ST 27:2;O4 , ST 27:2;O4 , ST 27:2;O4 , ST 27:2;O4 , ST 27:2;O4 , ST 27:2;O4 , ST 27:2;O4 , ST 27:2;O4 , ST 27:2;O4 , ST 27:2;O4 , ST 27:2;O4 , ST 28:1;O4 , ST 27:2;O4 , ST 27:2;O4 , ST 27:2;O4 , ST 27:2;O4 , ST 27:2;O4 , ST 27:2;O4 , ST 27:2;O4 , ST 27:2;O4 , ST 27:2;O4 )	-	C27H44O4	433.331	23.51	ST	Sterol Lipids [ST]	0.1	-	-	10200	9660	10100	9540
( ST 27:2;O2 , ST 27:2;O2 , ST 27:2;O2 , ST 27:2;O2 , ST 27:2;O2 , ST 27:2;O2 , ST 27:2;O2 , ST 27:2;O2 , ST 27:2;O2 , ST 27:2;O2 , ST 27:2;O2 , ST 27:2;O2 , ST 27:2;O2 , ST 27:2;O2 , ST 27:2;O2 , ST 27:2;O2 , ST 27:2;O2 , ST 27:2;O2 , ST 27:2;O2 )	-	C27H44O2	418.365	22.96	ST	Sterol Lipids [ST]	4.5	-	-	1560	1410	1450	1510
( ST 27:1;O3 , ST 27:1;O3 , ST 27:1;O3 , ST 27:1;O3 , ST 27:1;O3 , ST 27:1;O3 , ST 27:1;O3 , ST 27:1;O3 , ST 27:1;O3 , ST 27:1;O3 , ST 27:1;O3 , ST 27:1;O3 , ST 27:1;O3 , ST 27:1;O3 , ST 27:1;O3 , ST 27:1;O3 , ST 27:1;O3 , ST 27:1;O3 , ST 27:1;O3 , ST 27:1;O3 , ST 27:1;O3 , ST 27:1;O3 , ST 27:1;O3 , ST 27:1;O3 , ST 27:1;O3 , ST 27:1;O3 , ST 27:1;O3 , ST 27:1;O3 , ST 27:1;O3 , ST 27:1;O3 , ST 27:1…	-	C27H46O3	436.381	22.09	ST	Sterol Lipids [ST]	4.7	-	-	2440	2110	1690	1950
( ST 25:2;O ,)	-	C25H40O	374.339	23.19	ST	Sterol Lipids [ST]	1	-	-	1020	904	981	965
( ST 24:6;O6 ,)	-	C24H30O6	432.243	18.56	ST	Sterol Lipids [ST]	0.1	-	-	154000	177000	144000	140000
( ST 24:5;O8;HexNAc ,)	-	C32H45NO13	669.319	18.95	ST	Sterol Lipids [ST]	1	-	-	356	363	946	470
( ST 24:4;O6 , ST 24:4;O6 )	-	C24H34O6	419.237	18.08	ST	Sterol Lipids [ST]	2.8	-	-	16000	4310	7860	2610
( ST 24:1;O4;GlcA , ST 24:1;O4;GlcA , ST 24:1;O4;GlcA , ST 24:1;O4;GlcA , ST 24:1;O4;GlcA , ST 24:1;O4;GlcA )	-	C30H48O10	569.33	18.57	ST	Sterol Lipids [ST]	1.4	-	-	3960	3470	9850	4990
( ST 24:0;O4;S ,)	-	C24H42O7S	492.29	18.45	ST	Sterol Lipids [ST]	1.2	-	-	48200	47300	39000	33700
( ST 22:3;O2;Hex ,)	-	C28H42O7	491.297	18.4	ST	Sterol Lipids [ST]	7.7	-	-	12300	3430	2430	9270
( ST 21:2;O , ST 21:2;O )	-	C21H32O	318.28	19.78	ST	Sterol Lipids [ST]	1.6	-	-	353	350	291	279
( ST 19:0 ,)	-	C19H32	261.258	28.49	ST	Sterol Lipids [ST]	0.2	-	-	894	878	883	722
( ST 18:4;O2;GlcA ,)	-	C24H30O8	447.209	18.27	ST	Sterol Lipids [ST]	1.9	-	-	799	689	595	1110
( SPBP 19:1;O2 ,)	-	C19H40NO5P	411.299	19.81	SPBP	Sphingolipids [SP]	2	-	-	6460	6010	2070	2290
( SPB 16:4;O2 ,)	-	C16H27NO2	266.212	19.34	SPB	Sphingolipids [SP]	0.2	-	-	815	962	415	354
( SM 41:0;O2 , SM 41:0;O2 )	-	C46H95N2O6P	820.735	30.45	SM	Sphingolipids [SP]	3.4	-	-	14500	13700	13700	14200
( SM 32:1;O2 , SM 32:1;O2 , PE-Cer 35:1;O2 , PE-Cer 35:1;O2 , PE-Cer 35:1;O2 )	-	C37H75N2O6P	675.538	23.04		Sphingolipids [SP]	7.1	-	-	2950	2710	2730	2550
( PS O-31:1 , PS O-31:1 , PS O-31:1 )	-	C37H72NO9P	723.527	24.12	PS	Glycerophospholipids [GP]	1.7	-	-	1780	1810	1080	1730
( PS O-30:1 , PS O-30:1 , PS O-30:1 )	-	C36H70NO9P	692.484	19.97	PS	Glycerophospholipids [GP]	4.9	-	-	5660	4450	4110	1930
( PS O-29:1 , LPS O-29:2;O )	-	C35H68NO9P	678.474	19.91		Glycerophospholipids [GP]	3.9	-	-	18100	20100	18900	19600
( PS O-29:0 , LPS O-29:1;O )	-	C35H70NO9P	680.481	26.08		Glycerophospholipids [GP]	6.6	-	-	568000	589000	712000	647000
( PS O-28:1 ,)	-	C34H66NO9P	664.457	26.08	PS	Glycerophospholipids [GP]	2.9	-	-	137000	138000	165000	142000
( PS O-28:0 , LPS O-28:1;O )	-	C34H68NO9P	666.465	26.1		Glycerophospholipids [GP]	6.1	-	-	5000	4950	5650	5550
( PS 33:0 , PS 33:0 , PS 33:0 , PS 33:0 , PS 33:0 , PS 33:0 , PS 33:0 , PS 33:0 , PS 33:0 , PS 33:0 )	-	C39H76NO10P	767.548	24.35	PS	Glycerophospholipids [GP]	6.7	-	-	8100	8550	6520	6190
( PI-Cer 46:0;O3 , PI-Cer 46:0;O3 )	-	C52H104NO12P	983.766	32.81	PI-CeR	Sphingolipids [SP]	2.3	-	-	244	248	353	313
( PI-Cer 46:0;O3 , PI-Cer 46:0;O3 )	-	C52H104NO12P	983.77	47.27	PI-CeR	Sphingolipids [SP]	5.3	-	-	945	896	985	842
( PI-Cer 40:0;O4 , PI-Cer 40:0;O4 )	-	C46H92NO13P	915.661	23.84	PI-CeR	Sphingolipids [SP]	1.1	-	-	720	751	821	792
( PI O-42:7 ,)	-	C51H87O12P	940.633	28.57	PI	Glycerophospholipids [GP]	4.9	-	-	1280	1090	1290	1050
( PI O-40:3 , PI O-40:3 , PI O-40:3 )	-	C49H91O12P	920.664	21.03	PI	Glycerophospholipids [GP]	0	-	-	1330	1050	1050	973
( PI O-39:2 ,)	-	C48H91O12P	908.649	19.5	PI	Glycerophospholipids [GP]	0.3	-	-	56400	57900	166000	146000
( PI O-37:2 , PI O-37:2 , PI O-37:2 )	-	C46H87O12P	880.627	23.51	PI	Glycerophospholipids [GP]	0.1	-	-	7260	6920	6400	5750
( PI O-29:0 ,)	-	C38H75O12P	772.526	24.73	PI	Glycerophospholipids [GP]	2.8	-	-	1890	1510	1200	1240
( PI 42:2 , PI 42:2 , PI 42:2 , PI 42:2 , PI 42:2 , PI 42:2 )	-	C51H95O13P	964.685	20.66	PI	Glycerophospholipids [GP]	2.9	-	-	964	832	898	986
( PI 40:5 , PI 40:5 , PI 40:5 , PI 40:5 , PI 40:5 , PI 40:5 , PI 40:5 , PI 40:5 , PI 40:5 , PI 40:5 , PI 40:5 , PI 40:5 , PI 40:5 , PI 40:5 )	-	C49H85O13P	930.603	23.74	PI	Glycerophospholipids [GP]	3	-	-	1990	1990	1810	1640
( PI 40:4 , PI 40:4 , PI 40:4 , PI 40:4 , PI 40:4 , PI 40:4 , PI 40:4 , PI 40:4 , PI 40:4 , PI 40:4 , PI 40:4 , PI 40:4 , PI 40:4 , PI 40:4 , PI 40:4 )	-	C49H87O13P	932.617	24.03	PI	Glycerophospholipids [GP]	4.1	-	-	1480	1390	1480	1390
( PI 39:8 , PI 39:8 )	-	C48H77O13P	893.527	19.03	PI	Glycerophospholipids [GP]	2.1	-	-	6050	5850	5300	4980
( PI 38:3 , PI 38:3 , PI 38:3 , PI 38:3 , PI 38:3 , PI 38:3 , PI 38:3 , PI 38:3 , PI 38:3 , PI 38:3 , PI 38:3 , PI 38:3 )	-	C47H85O13P	889.579	23.78	PI	Glycerophospholipids [GP]	0.2	-	-	1450	1460	1470	955
( PI 36:1 , PI 36:1 , PI 36:1 , PI 36:1 , PI 36:1 , PI 36:1 , PI 36:1 , PI 36:1 , PI 36:1 , PI 36:1 , PI 36:1 , PI 36:1 , PI 36:1 , PI 36:1 , PI 36:1 , PI 36:1 )	-	C45H85O13P	882.611	23.94	PI	Glycerophospholipids [GP]	4.5	-	-	5870	5780	6290	5520
( PI 28:2 ,)	-	C37H67O13P	751.433	21.06	PI	Glycerophospholipids [GP]	6	-	-	464	496	449	381
( PI 25:0 , PI 25:0 )	-	C34H65O13P	713.424	21.58	PI	Glycerophospholipids [GP]	0.3	-	-	4880	4790	3820	3470
( PE-Cer 32:3;O2 ,)	-	C34H65N2O6P	646.498	19.83	PE-Cer	Sphingolipids [SP]	9.3	-	-	53700	59800	46500	54800
( PE O-19:1;O ,)	-	C24H48NO6P	495.357	21.68	PE	Glycerophospholipids [GP]	0.1	-	-	3950	4130	3960	3590
( PC 39:7 , PC 39:7 , PE 42:7 , PE 42:7 , PE 42:7 , PE 42:7 , PE 42:7 , PE 42:7 )	-	C47H80NO8P	835.6	24.55		Glycerophospholipids [GP]	4	-	-	7010	6730	5540	5600
( PC 38:5 , PC 38:5 , PC 38:5 , PC 38:5 , PC 38:5 , PC 38:5 , PC 38:5 , PC 38:5 , PC 38:5 , PC 38:5 , PC 38:5 , PC 38:5 , PC 38:5 , PC 38:5 , PC 38:5 , PC 38:5 , PC 38:5 , PC 38:5 , PC 38:5 , PC 38:5 , PC 38:5 , PC 38:5 , PC 38:5 , PC 38:5 , PE 41:5 , PE 41:5 , PE 41:5 , PE 41:5 )	-	C46H82NO8P	825.618	24.91	PC	Glycerophospholipids [GP]	6.3	-	-	1200	1120	1230	1090
( PC 37:3 , PC 37:3 , PC 37:3 , PC 37:3 , PC 37:3 , PC 37:3 , PC 37:3 , PC 37:3 , PC 37:3 , PC 37:3 , PC 37:3 , PC 37:3 , PC 37:3 , PC 37:3 , PE 40:3 , PE 40:3 , PE 40:3 , PE 40:3 , PE 40:3 , PE 40:3 , PE 40:3 , PE 40:3 , PE 40:3 , PE 40:3 , PE 40:3 , PE 40:3 )	-	C45H84NO8P	815.633	25.25	PC	Glycerophospholipids [GP]	5.1	-	-	6520	6900	7450	6570
( PC 36:2 , PC 36:2 , PC 36:2 , PC 36:2 , PC 36:2 , PC 36:2 , PC 36:2 , PC 36:2 , PC 36:2 , PC 36:2 , PC 36:2 , PC 36:2 , PC 36:2 , PC 36:2 , PC 36:2 , PC 36:2 , PC 36:2 , PC 36:2 , PC 36:2 , PC 36:2 , PC 36:2 , PC 36:2 , PC 36:2 , PC 36:2 , PC 36:2 , PC 36:2 , PC 36:2 , PC 36:2 , PC 36:2 , PC 36:2 , PC 36:2 , PC 36:2 , PC 36:2 , PC 36:2 , PC 36:2 , PC 36:2 , PC 36:2 , PC 36:2 , PC 36:2 , PC 36:2…	-	C44H84NO8P	803.631	25.44	PC	Glycerophospholipids [GP]	3.2	-	-	1790	2020	1840	1610
( PC 31:2 , PC 31:2 , PC 31:2 , PC 31:2 , PC 31:2 , PC 31:2 , PC 31:2 , PC 31:2 , PE 34:2 , PE 34:2 , PE 34:2 , PE 34:2 , PE 34:2 , PE 34:2 , PE 34:2 , PE 34:2 , PE 34:2 , PE 34:2 , PE 34:2 , PE 34:2 , PE 34:2 , PE 34:2 , PE 34:2 , PE 34:2 )	-	C39H74NO8P	733.549	19.73		Glycerophospholipids [GP]	0.3	-	-	199000	191000	242000	225000
( PC 29:2 , PC 29:2 , PC 29:2 , PC 29:2 , PE 32:2 , PE 32:2 , PE 32:2 , PE 32:2 , PE 32:2 , PE 32:2 , PE 32:2 , PE 32:2 , PE 32:2 , PE 32:2 , PE 32:2 , PE 32:2 , PE 32:2 )	-	C37H70NO8P	705.522	23.25		Glycerophospholipids [GP]	6.2	-	-	3170	3030	2240	2310
( PA O-40:3 , PA O-40:3 , PA O-40:3 )	-	C43H81O7P	741.573	38.04	PA	Glycerophospholipids [GP]	7.2	-	-	399	431	432	422
( PA O-38:5 , PA O-38:5 , PA O-38:5 , PA O-38:5 )	-	C41H73O7P	726.546	24.41	PA	Glycerophospholipids [GP]	2.6	-	-	4200	7640	1990	3920
( PA O-36:5 , PA O-36:5 , PA O-36:5 )	-	C39H69O7P	681.485	26.08	PA	Glycerophospholipids [GP]	0.3	-	-	263000	259000	301000	283000
( PA O-36:4 , PA O-36:4 , PA O-36:4 , PA O-36:4 , PA O-36:4 )	-	C39H71O7P	700.527	24.56	PA	Glycerophospholipids [GP]	0.4	-	-	821	943	861	667
( PA 44:6 , PA 44:6 , PA 44:6 , PA 44:6 )	-	C47H81O8P	822.598	19.58	PA	Glycerophospholipids [GP]	0.2	-	-	24900	22800	41900	39500
( PA 39:8 , PA 39:8 )	-	C42H67O8P	748.48	20.49	PA	Glycerophospholipids [GP]	2	-	-	1450	1620	1280	1390
( PA 38:6 , PA 38:6 , PA 38:6 , PA 38:6 , PA 38:6 , PA 38:6 , PA 38:6 , PA 38:6 , PA 38:6 , PA 38:6 , PA 38:6 , PA 38:6 )	-	C41H69O8P	738.506	20.23	PA	Glycerophospholipids [GP]	0.7	-	-	2130	1970	1220	1100
( NAPE 34:1 ,)	-	C59H106NO9P	1021.8	33.14	NAPE	Glycerophospholipids [GP]	0.3	-	-	323	293	284	271
( NAE 20:3 , NAE 20:3 , NAE 20:3 , NAE 20:3 )	-	C22H39NO2	367.333	23.45	NAE	Fatty Acyls [FA]	6.7	-	-	4130	2000	4250	3450
( NA 28:8;O3 , NA 28:8;O3 )	-	C28H41NO4	473.345	20.46	NA	Fatty Acyls [FA]	1.7	-	-	6560	6540	5060	4370
( NA 27:5;O2 ,)	-	C27H45NO3	449.375	0.09	NA	Fatty Acyls [FA]	1.3	-	-	830	738	714	651
( NA 26:5;O2 , NA 26:5;O2 , NA 26:5;O2 )	-	C26H43NO3	435.349	21.8	NA	Fatty Acyls [FA]	0.8	-	-	1550	1420	1410	1110
( NA 23:2;O2 ,)	-	C23H43NO3	399.356	20.57	NA	Fatty Acyls [FA]	4.5	-	-	623	582	970	814
( NA 23:1;O2 ,)	-	C23H45NO3	384.346	21.84	NA	Fatty Acyls [FA]	1.9	-	-	6970	6810	7530	6360
( NA 20:2;O2 ,)	-	C20H37NO3	357.307	22.18	NA	Fatty Acyls [FA]	1.7	-	-	4820	5110	8880	6070
( MIPC 46:0;O3 , MIPC 46:0;O3 )	-	C58H114NO17P	1145.82	41.87		Sphingolipids [SP]	2.7	-	-	835	863	776	684
( MG 22:5 , ST 25:2;O4 )	-	C25H40O4	422.33	23.15		Sterol Lipids [ST] Glycerolipids [GL]	6.5	-	-	1920	2120	1940	1670
( M(IP)2C 40:0;O4 , M(IP)2C 40:0;O4 )	-	C58H113NO26P2	1302.72	19.17		Sphingolipids [SP]	3.4	-	-	904	1050	621	608
( M(IP)2C 40:0;O3 , M(IP)2C 40:0;O3 , M(IP)2C 40:0;O3 , M(IP)2C 40:0;O3 )	-	C58H113NO25P2	1286.7	19.19		Sphingolipids [SP]	2.2	-	-	807	1020	887	656
( LPS 19:0 , LPS O-19:1;O )	-	C25H50NO9P	540.329	19.27	LPS	Glycerophospholipids [GP]	1.3	-	-	8950	8990	6650	6120
( LPI 19:1 ,)	-	C28H53O12P	630.354	17.58	LPI	Glycerophospholipids [GP]	7.4	-	-	13600	14100	10800	9990
( LPI 18:1 , PG 21:1;O2 )	-	C27H51O12P	616.344	17.09		Glycerophospholipids [GP]	2.3	-	-	7440	6390	1810	2010
( LPG 20:3 , PA 23:2;O )	-	C26H47O9P	552.325	18.26		Glycerophospholipids [GP]	7.7	-	-	22300	22000	18400	19400
( LPG 18:2 , PA 21:1;O )	-	C24H45O9P	509.289	17.99		Glycerophospholipids [GP]	2	-	-	5550	5980	4900	4570
( LPG 18:1 ,)	-	C24H47O9P	528.333	19.62	LPG	Glycerophospholipids [GP]	1.8	-	-	4310	5820	5080	5410
( LPE 22:5 , LPE 22:5 , LPE 22:5 , LPE 22:5 )	-	C27H46NO7P	545.332	18.66	LPE	Glycerophospholipids [GP]	3.9	-	-	5410	5390	4370	3690
( LPE 18:3 , LPE 18:3 , LPE 18:3 , LPE 18:3 )	-	C23H42NO7P	493.28	18.35	LPE	Glycerophospholipids [GP]	4.4	-	-	11500	8850	7680	8690
( LPC 20:4 , LPC 20:4 , LPC 20:4 )	-	C28H50NO7P	544.355	20.25	LPC	Glycerophospholipids [GP]	1.2	-	-	684	1280	1280	1450
( LPA O-20:4 ,)	-	C23H41O6P	462.288	18.77	LPA	Glycerophospholipids [GP]	2.5	-	-	7070	7380	5460	7950
( LPA 18:3 , LPA 18:3 )	-	C21H37O7P	450.267	17.54	LPA	Glycerophospholipids [GP]	3	-	-	7670	8200	13000	13000
( LPA 14:1 ,)	-	C17H33O7P	398.232	20.72	LPA	Glycerophospholipids [GP]	1.8	-	-	290	286	315	271
( HexCer 41:1;O2 , HexCer 41:1;O2 )	-	C47H91NO8	798.689	0.06	HexCER	Sphingolipids [SP]	7.6	-	-	347	291	234	171
( Hex2Cer 40:1;O2 , Hex2Cer 40:1;O2 , Hex2Cer 40:1;O2 )	-	C52H99NO13	946.713	25.4	HexCER	Sphingolipids [SP]	2.8	-	-	515	546	484	400
( Hex(3)-HexNAc-Cer 44:1;O2 , Hex(3)-HexNAc-Cer 44:1;O2 , Hex(3)-HexNAc-Cer 44:1;O2 , Hex(3)-HexNAc-Cer 44:1;O2 , Hex(3)-HexNAc-Cer 44:1;O2 , Hex(3)-HexNAc-Cer 44:1;O2 )	-	C70H130N2O23	1384.95	26.05	HexCER	Sphingolipids [SP]	0.2	-	-	533	478	505	212
( Hex(3)-HexNAc-Cer 38:1;O2 , Hex(3)-HexNAc-Cer 38:1;O2 , Hex(3)-HexNAc-Cer 38:1;O2 , Hex(3)-HexNAc-Cer 38:1;O2 , Hex(3)-HexNAc-Cer 38:1;O2 , Hex(3)-HexNAc-Cer 38:1;O2 )	-	C64H118N2O23	1300.84	23.56	HexCER	Sphingolipids [SP]	6.7	-	-	468	471	499	504
( Hex(2)-NeuAc-Cer 42:1;O2 ,)	-	C65H120N2O21	1265.84	24.69	HexCER	Sphingolipids [SP]	6	-	-	1540	1450	1160	1380
( Hex(2)-NeuAc-Cer 40:1;O2 ,)	-	C63H116N2O21	1237.81	24.1	HexCER	Sphingolipids [SP]	0.1	-	-	548	529	489	417
( Hex(2)-NeuAc-Cer 38:1;O2 ,)	-	C61H112N2O21	1209.79	29.06	HexCER	Sphingolipids [SP]	7.2	-	-	1120	1010	1060	891
( Hex(2)-HexNAc-NeuAc-Cer 42:1;O2 , Hex(2)-HexNAc-NeuAc-Cer 42:1;O2 )	-	C73H133N3O26	1485.94	24.49	HexCER	Sphingolipids [SP]	6	-	-	1360	1170	1200	1050
( Hex(2)-HexNAc-NeuAc-Cer 40:1;O2 , Hex(2)-HexNAc-NeuAc-Cer 40:1;O2 )	-	C71H129N3O26	1457.92	23.98	HexCER	Sphingolipids [SP]	0.9	-	-	324	307	276	217
( Hex(2)-HexNAc-NeuAc-Cer 36:1;O2 , Hex(2)-HexNAc-NeuAc-Cer 36:1;O2 )	-	C67H121N3O26	1401.85	22.92	HexCER	Sphingolipids [SP]	2.4	-	-	186	171	163	121
( Hex(2)-HexNAc-NeuAc-Cer 34:1;O2 , Hex(2)-HexNAc-NeuAc-Cer 34:1;O2 )	-	C65H117N3O26	1373.82	22.46	HexCER	Sphingolipids [SP]	3.6	-	-	358	354	347	369
( Hex(2)-HexNAc-NeuAc-Cer 34:1;O2 , Hex(2)-HexNAc-NeuAc-Cer 34:1;O2 )	-	C65H117N3O26	1356.8	22.48	HexCER	Sphingolipids [SP]	0.5	-	-	144	190	97.5	125
( Hex(2)-HexNAc-Cer 42:2;O2 , Hex(2)-HexNAc-Cer 42:2;O2 , Hex-HexNAc-Cer 42:2;O2 )	-	C62H114N2O18	1175.82	38.28	HexCER	Sphingolipids [SP]	4.8	-	-	1040	1120	1380	1240
( FOH 21:0;O , FOH 21:0;O , FOH 21:0;O , FOH 21:0;O )	-	C21H44O2	346.365	22.1	FOH	Fatty Acyls [FA]	3	-	-	127	121	306	318
( FOH 18:3 , FAL 18:2 , FAL 18:2 , FAL 18:2 , FAL 18:2 , FAL 18:2 , FAL 18:2 , FAL 18:2 , FAL 18:2 , FAL 18:2 )	-	C18H32O	265.252	21.31		Fatty Acyls [FA]	0.3	-	-	111	89.7	113	94.1
( FOH 17:6;O2 , FOH 17:6;O2 , FOH 17:6;O2 , FOH 17:6;O2 )	-	C17H24O3	277.181	19.42	FOH	Fatty Acyls [FA]	1.4	-	-	42100	37800	11600	12800
( FOH 17:1 , FOH 17:1 , FOH 17:1 , FOH 17:1 , FAL 17:0 )	-	C17H34O	255.267	22.96		Fatty Acyls [FA]	3.4	-	-	134	176	136	97.7
( FOH 15:1 , FAL 15:0 , FAL 15:0 )	-	C15H30O	244.265	18.85		Fatty Acyls [FA]	2.4	-	-	67.2	63.1	43.9	36.2
( FOH 14:0;O ,)	-	C14H30O2	248.248	20.45		Fatty Acyls [FA]	0.7	-	-	336	343	540	473
( FAL 17:2 ,)	-	C17H30O	268.263	20.03	FAL	Fatty Acyls [FA]	1.2	-	-	7020	6440	4140	4020
( FAL 14:3 ,)	-	C14H22O	207.175	25.22	FAL	Fatty Acyls [FA]	0.8	-	-	175	171	164	195
( FAHFA 36:4;O ,)	-	C36H64O4	578.514	24.01	FAHFA	Fatty Acyls [FA]	0.9	-	-	2050	2000	2050	1860
( FAHFA 36:2;O , FAHFA 36:2;O , FAHFA 36:2;O , FAHFA 36:2;O , FAHFA 36:2;O , FAHFA 36:2;O , FAHFA 36:2;O , FAHFA 36:2;O , FAHFA 36:2;O , FAHFA 36:2;O )	-	C36H68O4	565.517	26.27	FAHFA	Fatty Acyls [FA]	3.1	-	-	6120	4900	5330	5030
( FAHFA 36:1;O , FAHFA 36:1;O , FAHFA 36:1;O , FAHFA 36:1;O , FAHFA 36:1;O , FAHFA 36:1;O , FAHFA 36:1;O , FAHFA 36:1;O , FAHFA 36:1;O , FAHFA 36:1;O , FAHFA 36:1;O , FAHFA 36:1;O , FAHFA 36:1;O , FAHFA 36:1;O )	-	C36H70O4	584.559	27.24	FAHFA	Fatty Acyls [FA]	3.6	-	-	15000	15000	13800	13600
( FAHFA 34:2;O , FAHFA 34:2;O , FAHFA 34:2;O , FAHFA 34:2;O , FAHFA 34:2;O , FAHFA 34:2;O , FAHFA 34:2;O , FAHFA 34:2;O , FAHFA 34:2;O , FAHFA 34:2;O , FAHFA 34:2;O , FAHFA 34:2;O , FAHFA 34:2;O , FAHFA 34:2;O , FAHFA 34:2;O , FAHFA 34:2;O )	-	C34H64O4	537.487	25.79	FAHFA	Fatty Acyls [FA]	1	-	-	4090	4270	4090	3910
( FAHFA 34:1;O , FAHFA 34:1;O , FAHFA 34:1;O , FAHFA 34:1;O , FAHFA 34:1;O , FAHFA 34:1;O , FAHFA 34:1;O , FAHFA 34:1;O , FAHFA 34:1;O , FAHFA 34:1;O , FAHFA 34:1;O , FAHFA 34:1;O , FAHFA 34:1;O , FAHFA 34:1;O , FAHFA 34:1;O , FAHFA 34:1;O , FAHFA 34:1;O , FAHFA 34:1;O , FAHFA 34:1;O , FAHFA 34:1;O , FAHFA 34:1;O )	-	C34H66O4	556.529	26.38	FAHFA	Fatty Acyls [FA]	0.4	-	-	11000	10700	11400	10300
( FAHFA 34:1;O , FAHFA 34:1;O , FAHFA 34:1;O , FAHFA 34:1;O , FAHFA 34:1;O , FAHFA 34:1;O , FAHFA 34:1;O , FAHFA 34:1;O , FAHFA 34:1;O , FAHFA 34:1;O , FAHFA 34:1;O , FAHFA 34:1;O , FAHFA 34:1;O , FAHFA 34:1;O , FAHFA 34:1;O , FAHFA 34:1;O , FAHFA 34:1;O , FAHFA 34:1;O , FAHFA 34:1;O , FAHFA 34:1;O , FAHFA 34:1;O )	-	C34H66O4	539.504	24.77	FAHFA	Fatty Acyls [FA]	1.1	-	-	3810	3550	3730	3310
( FAHFA 32:2;O , FAHFA 32:2;O , FAHFA 32:2;O , FAHFA 32:2;O , FAHFA 32:2;O , FAHFA 32:2;O , FAHFA 32:2;O , FAHFA 32:2;O )	-	C32H60O4	509.453	25.13	FAHFA	Fatty Acyls [FA]	4.1	-	-	4220	3910	4110	3730
( FA 88:1;O2 ,)	-	C88H174O4	1296.36	26.66	FA	Fatty Acyls [FA]	8.7	-	-	11000	14400	17600	15400
( FA 87:2;O2 ,)	-	C87H170O4	1280.32	29	FA	Fatty Acyls [FA]	3.9	-	-	676	631	825	645
( FA 86:1;O2 ,)	-	C86H170O4	1285.35	41.88	FA	Fatty Acyls [FA]	1.3	-	-	112	110	138	126
( FA 36:5 , FA 36:5 , WE 36:5 , WE 36:5 , WE 36:5 )	-	C36H62O2	544.506	28.73	FA	Fatty Acyls [FA]	4.9	-	-	6280	5960	6100	5180
( FA 36:4 , WE 36:4 , WE 36:4 , WE 36:4 )	-	C36H64O2	546.52	29.59	FA	Fatty Acyls [FA]	6.4	-	-	1720	1650	1680	1530
( FA 36:0;O ,)	-	C36H72O3	570.579	21.49	FA	Fatty Acyls [FA]	2.5	-	-	324	312	637	611
( FA 35:0 , FA 35:0 , WE 35:0 )	-	C35H70O2	540.568	32.79	FA	Fatty Acyls [FA]	4.7	-	-	4030	3860	4180	3790
( FA 34:5 , FA 34:5 , WE 34:5 )	-	C34H58O2	516.475	27.67	FA	Fatty Acyls [FA]	2.6	-	-	1480	1380	1460	1300
( FA 34:1 , WE 34:1 , WE 34:1 , WE 34:1 , WE 34:1 , WE 34:1 , WE 34:1 , WE 34:1 , WE 34:1 , WE 34:1 , WE 34:1 , WE 34:1 , WE 34:1 , WE 34:1 , FA 34:1 , FA 34:1 )	-	C34H66O2	524.537	27.1	FA	Fatty Acyls [FA]	5.2	-	-	20500	18500	20500	17300
( FA 34:1 , WE 34:1 , WE 34:1 , WE 34:1 , WE 34:1 , WE 34:1 , WE 34:1 , WE 34:1 , WE 34:1 , WE 34:1 , WE 34:1 , WE 34:1 , WE 34:1 , WE 34:1 , FA 34:1 , FA 34:1 )	-	C34H66O2	524.54	31.13	FA	Fatty Acyls [FA]	0.5	-	-	25200	27900	28000	25200
( FA 34:1 , WE 34:1 , WE 34:1 , WE 34:1 , WE 34:1 , WE 34:1 , WE 34:1 , WE 34:1 , WE 34:1 , WE 34:1 , WE 34:1 , WE 34:1 , WE 34:1 , WE 34:1 , FA 34:1 , FA 34:1 )	-	C34H66O2	507.512	31.15	FA	Fatty Acyls [FA]	1.5	-	-	11500	12600	13100	11100
( FA 34:0 , FA 34:0 , FA 34:0 , WE 34:0 , WE 34:0 , WE 34:0 , WE 34:0 , WE 34:0 , WE 34:0 )	-	C34H68O2	526.552	28.29	FA	Fatty Acyls [FA]	7.1	-	-	1800	2460	2180	1480
( FA 33:2 , FA 33:2 )	-	C33H62O2	508.508	29.41	FA	Fatty Acyls [FA]	1.9	-	-	3540	3560	3730	3340
( FA 33:2 , FA 33:2 )	-	C33H62O2	491.478	29.42	FA	Fatty Acyls [FA]	7.4	-	-	1230	1240	1250	1200
( FA 33:0 , FA 33:0 , FA 33:0 , WE 33:0 , WE 33:0 , WE 33:0 , WE 33:0 )	-	C33H66O2	512.537	31.25	FA	Fatty Acyls [FA]	5.2	-	-	4220	4620	4840	4000
( FA 33:0 , FA 33:0 , FA 33:0 , WE 33:0 , WE 33:0 , WE 33:0 , WE 33:0 )	-	C33H66O2	495.51	31.26	FA	Fatty Acyls [FA]	7.2	-	-	2280	2540	2520	2210
( FA 32:4 , WE 32:4 , WE 32:4 )	-	C32H56O2	490.459	27.99	FA	Fatty Acyls [FA]	0.6	-	-	237	211	195	160
( FA 32:1;O2 , FAHFA 32:1;O , FAHFA 32:1;O , FAHFA 32:1;O , FAHFA 32:1;O , FAHFA 32:1;O , FAHFA 32:1;O , FAHFA 32:1;O , FAHFA 32:1;O , FAHFA 32:1;O , FAHFA 32:1;O , FAHFA 32:1;O , FAHFA 32:1;O )	-	C32H62O4	528.499	25.55	FA	Fatty Acyls [FA]	1.3	-	-	12500	13700	12000	11800
( FA 32:1;O2 , FAHFA 32:1;O , FAHFA 32:1;O , FAHFA 32:1;O , FAHFA 32:1;O , FAHFA 32:1;O , FAHFA 32:1;O , FAHFA 32:1;O , FAHFA 32:1;O , FAHFA 32:1;O , FAHFA 32:1;O , FAHFA 32:1;O , FAHFA 32:1;O )	-	C32H62O4	511.475	25.58	FA	Fatty Acyls [FA]	3.5	-	-	5710	5530	5120	4870
( FA 32:1 , WE 32:1 , WE 32:1 , WE 32:1 , WE 32:1 , WE 32:1 , WE 32:1 , FA 32:1 , FA 32:1 )	-	C32H62O2	496.509	29.75	FA	Fatty Acyls [FA]	0.1	-	-	22400	22900	22900	21100
( FA 32:1 , WE 32:1 , WE 32:1 , WE 32:1 , WE 32:1 , WE 32:1 , WE 32:1 , FA 32:1 , FA 32:1 )	-	C32H62O2	479.482	29.77	FA	Fatty Acyls [FA]	0	-	-	13600	14000	14400	12600
( FA 32:0 , FA 32:0 , WE 32:0 , WE 32:0 , WE 32:0 , WE 32:0 , WE 32:0 , WE 32:0 , WE 32:0 , WE 32:0 , WE 32:0 )	-	C32H64O2	498.522	30.71	FA	Fatty Acyls [FA]	2.8	-	-	5680	6000	6140	5390
( FA 32:0 , FA 32:0 , WE 32:0 , WE 32:0 , WE 32:0 , WE 32:0 , WE 32:0 , WE 32:0 , WE 32:0 , WE 32:0 , WE 32:0 )	-	C32H64O2	481.495	30.72	FA	Fatty Acyls [FA]	5.4	-	-	2950	3110	3130	2740
( FA 31:1 , WE 31:1 , FA 31:1 )	-	C31H60O2	482.492	29.11	FA	Fatty Acyls [FA]	1.2	-	-	9490	9050	9910	8570
( FA 31:1 , WE 31:1 , FA 31:1 )	-	C31H60O2	465.465	29.12	FA	Fatty Acyls [FA]	2.5	-	-	7580	7370	7660	6790
( FA 31:0 , FA 31:0 , FA 31:0 , FA 31:0 , FA 31:0 , WE 31:0 , WE 31:0 , WE 31:0 , WE 31:0 , WE 31:0 , WE 31:0 , WE 31:0 , WE 31:0 , WE 31:0 , WE 31:0 , WE 31:0 , WE 31:0 , WE 31:0 , WE 31:0 , WE 31:0 , WE 31:0 , WE 31:0 , WE 31:0 )	-	C31H62O2	484.507	29.87	FA	Fatty Acyls [FA]	3.1	-	-	3990	4160	4340	3860
( FA 31:0 , FA 31:0 , FA 31:0 , FA 31:0 , FA 31:0 , WE 31:0 , WE 31:0 , WE 31:0 , WE 31:0 , WE 31:0 , WE 31:0 , WE 31:0 , WE 31:0 , WE 31:0 , WE 31:0 , WE 31:0 , WE 31:0 , WE 31:0 , WE 31:0 , WE 31:0 , WE 31:0 , WE 31:0 , WE 31:0 )	-	C31H62O2	467.478	29.88	FA	Fatty Acyls [FA]	7.6	-	-	2480	2510	2480	2330
( FA 30:4 , WE 30:4 , ST 30:1;O2 , ST 30:1;O2 )	-	C30H52O2	462.431	23.46		Sterol Lipids [ST] Fatty Acyls [FA]	0.3	-	-	53800	56700	62200	60200
( FA 30:2 , FA 30:2 , FA 30:2 , FA 30:2 , WE 30:2 , WE 30:2 , WE 30:2 , WE 30:2 )	-	C30H56O2	466.46	27.86	FA	Fatty Acyls [FA]	2.4	-	-	1150	1200	1180	1150
( FA 30:1;O2 , FA 30:1;O2 , FAHFA 30:1;O )	-	C30H58O4	500.47	24.82	FA	Fatty Acyls [FA]	4.3	-	-	10500	10700	12400	10100
( FA 30:1;O2 , FA 30:1;O2 , FAHFA 30:1;O )	-	C30H58O4	483.444	24.94	FA	Fatty Acyls [FA]	2.4	-	-	2110	4280	4380	4090
( FA 30:0;O ,)	-	C30H60O3	469.459	0.06	FA	Fatty Acyls [FA]	2.5	-	-	286	223	205	174
( FA 29:1 , FA 29:1 , WE 29:1 )	-	C29H56O2	454.46	28.03	FA	Fatty Acyls [FA]	3.8	-	-	3060	2830	2920	2750
( FA 29:1 , FA 29:1 , WE 29:1 )	-	C29H56O2	437.439	27.78	FA	Fatty Acyls [FA]	4.5	-	-	3020	2970	3080	2730
( FA 28:5 , FA 28:5 , ST 28:2;O2 , ST 28:2;O2 , ST 28:2;O2 , ST 28:2;O2 , ST 28:2;O2 , ST 28:2;O2 , ST 28:2;O2 , ST 28:2;O2 , ST 28:2;O2 , ST 28:2;O2 )	-	C28H46O2	432.378	21.73		Sterol Lipids [ST] Fatty Acyls [FA]	0.6	-	-	308	2490	2760	418
( FA 28:1 , FA 28:1 , FA 28:1 , FA 28:1 , FA 28:1 , FA 28:1 , FA 28:1 , WE 28:1 , WE 28:1 , WE 28:1 , FA 28:1 , FA 28:1 )	-	C28H54O2	440.446	27.78	FA	Fatty Acyls [FA]	2.6	-	-	2770	2560	2790	2450
( FA 28:1 , FA 28:1 , FA 28:1 , FA 28:1 , FA 28:1 , FA 28:1 , FA 28:1 , WE 28:1 , WE 28:1 , WE 28:1 , FA 28:1 , FA 28:1 )	-	C28H54O2	423.419	0.07	FA	Fatty Acyls [FA]	0.2	-	-	1210	1100	986	835
( FA 28:1 , FA 28:1 , FA 28:1 , FA 28:1 , FA 28:1 , FA 28:1 , FA 28:1 , WE 28:1 , WE 28:1 , WE 28:1 , FA 28:1 , FA 28:1 )	-	C28H54O2	423.418	27.53	FA	Fatty Acyls [FA]	2.3	-	-	3050	3080	3300	3020
( FA 26:5;O2 , FA 26:5;O2 , MG O-23:6;O , ST 26:2;O4 )	-	C26H42O4	436.342	23.28		Sterol Lipids [ST] Glycerolipids [GL] Fatty Acyls [FA]	0.1	-	-	12100	11600	11400	10700
( FA 26:5;O2 , FA 26:5;O2 , MG O-23:6;O , ST 26:2;O4 )	-	C26H42O4	419.317	23.27		Sterol Lipids [ST] Glycerolipids [GL] Fatty Acyls [FA]	3.2	-	-	133000	121000	125000	124000
( FA 26:3 , FA 26:3 , FA 26:3 , FA 26:3 , FA 26:3 , FA 26:3 , WE 26:3 )	-	C26H46O2	391.354	0.07	FA	Fatty Acyls [FA]	4.8	-	-	114	104	123	92.8
( FA 26:3 , FA 26:3 , FA 26:3 , FA 26:3 , FA 26:3 , FA 26:3 , WE 26:3 )	-	C26H46O2	391.354	26.24	FA	Fatty Acyls [FA]	5.5	-	-	168	210	159	190
( FA 26:2 , FA 26:2 , FA 26:2 , FA 26:2 , FA 26:2 , FA 26:2 , FA 26:2 , WE 26:2 )	-	C26H48O2	393.37	22.39	FA	Fatty Acyls [FA]	2.7	-	-	216	172	199	146
( FA 26:0 , FA 26:0 , FA 26:0 , FA 26:0 , FA 26:0 , FA 26:0 , FA 26:0 , FA 26:0 , FA 26:0 , WE 26:0 , WE 26:0 , WE 26:0 , WE 26:0 , WE 26:0 )	-	C26H52O2	414.432	0.06	FA	Fatty Acyls [FA]	1.4	-	-	2410	2020	1570	1080
( FA 26:0 , FA 26:0 , FA 26:0 , FA 26:0 , FA 26:0 , FA 26:0 , FA 26:0 , FA 26:0 , FA 26:0 , WE 26:0 , WE 26:0 , WE 26:0 , WE 26:0 , WE 26:0 )	-	C26H52O2	397.404	0.06	FA	Fatty Acyls [FA]	0.8	-	-	1810	1410	1200	907
( FA 25:5;O6 , ST 19:0;O2;GlcA , ST 19:0;O2;GlcA , ST 19:0;O2;GlcA , ST 19:0;O2;GlcA )	-	C25H40O8	469.284	18.77	FA	Sterol Lipids [ST] Fatty Acyls [FA]	0.2	-	-	2780	3060	2390	2480
( FA 25:3;O ,)	-	C25H44O3	410.364	22.56	FA	Fatty Acyls [FA]	1.6	-	-	2140	2160	2070	1860
( FA 25:2 , FA 25:2 )	-	C25H46O2	379.356	23.04	FA	Fatty Acyls [FA]	0.7	-	-	289	217	243	214
( FA 24:2;O ,)	-	C24H44O3	398.361	22.85	FA	Fatty Acyls [FA]	2.7	-	-	3100	2980	3090	3030
( FA 24:0 , FA 24:0 , FA 24:0 , FA 24:0 , FA 24:0 , FA 24:0 , FA 24:0 , WE 24:0 , WE 24:0 , WE 24:0 , WE 24:0 , WE 24:0 , WE 24:0 , WE 24:0 , WE 24:0 )	-	C24H48O2	386.399	0.05	FA	Fatty Acyls [FA]	0.9	-	-	531	423	369	272
( FA 23:1;O , FA 23:1;O , FA 23:1;O )	-	C23H44O3	369.344	23.8	FA	Fatty Acyls [FA]	0.3	-	-	5240	12000	10400	5280
( FA 23:0 , FA 23:0 , FA 23:0 , WE 23:0 , WE 23:0 , WE 23:0 , WE 23:0 , WE 23:0 , WE 23:0 )	-	C23H46O2	355.355	25.72	FA	Fatty Acyls [FA]	1.7	-	-	327	255	229	233
( FA 22:6;O4 ,)	-	C22H32O6	410.253	18.77	FA	Fatty Acyls [FA]	0	-	-	4640	4850	4060	3680
( FA 22:4;O4 , FA 22:4;O4 )	-	C22H36O6	414.287	19.07	FA	Fatty Acyls [FA]	0.5	-	-	23500	17600	12200	13300
( FA 22:4 , FA 22:4 , FA 22:4 , FA 22:4 , FA 22:4 , FA 22:4 , FA 22:4 , FA 22:4 , FA 22:4 , WE 22:4 )	-	C22H36O2	350.31	22.05	FA	Fatty Acyls [FA]	1	-	-	1220	1140	1170	1010
( FA 22:4 , FA 22:4 , FA 22:4 , FA 22:4 , FA 22:4 , FA 22:4 , FA 22:4 , FA 22:4 , FA 22:4 , WE 22:4 )	-	C22H36O2	333.287	21.83	FA	Fatty Acyls [FA]	3	-	-	4900	4820	4640	4450
( FA 22:3 , FA 22:3 , FA 22:3 , FA 22:3 , FA 22:3 , FA 22:3 , FA 22:3 , FA 22:3 , FA 22:3 , FA 22:3 , FA 22:3 , FA 22:3 , FA 22:3 , FA 22:3 , WE 22:3 , WE 22:3 )	-	C22H38O2	335.297	24	FA	Fatty Acyls [FA]	1.7	-	-	425	361	360	844
( FA 22:2;O ,)	-	C22H40O3	353.303	22.6	FA	Fatty Acyls [FA]	5.1	-	-	1690	1660	1710	1600
( FA 22:0 , FA 22:0 , FA 22:0 , FA 22:0 , FA 22:0 , WE 22:0 , WE 22:0 , WE 22:0 , WE 22:0 , WE 22:0 , WE 22:0 , WE 22:0 , WE 22:0 , WE 22:0 , WE 22:0 )	-	C22H44O2	358.365	20.93	FA	Fatty Acyls [FA]	4.2	-	-	134	198	223	205
( FA 21:1 , FA 21:1 , FA 21:1 , FA 21:1 , FA 21:1 , FA 21:1 , WE 21:1 , WE 21:1 , WE 21:1 )	-	C21H40O2	325.31	24.25	FA	Fatty Acyls [FA]	4.3	-	-	870	712	911	850
( FA 20:5;O5 ,)	-	C20H30O7	400.236	18.12	FA	Fatty Acyls [FA]	6.8	-	-	3000	1360	1350	1710
( FA 20:1;O , FA 20:1;O , FA 20:1;O , FA 20:1;O , FA 20:1;O , FA 20:1;O , FA 20:1;O )	-	C20H38O3	327.289	22.08	FA	Fatty Acyls [FA]	0.2	-	-	5750	5740	5950	5370
( FA 19:3;O6 , FA 19:3;O6 , FA 19:3;O6 , FA 19:3;O6 )	-	C19H32O8	406.241	18.11	FA	Fatty Acyls [FA]	3.3	-	-	8340	8210	6810	6820
( FA 19:3;O , FA 19:3;O , FA 19:3;O , FA 19:3;O , FA 19:3;O , FA 19:3;O , FA 19:3;O , FA 19:3;O )	-	C19H32O3	326.273	20.63	FA	Fatty Acyls [FA]	1.1	-	-	4210	4290	3540	3350
( FA 19:2;O , FA 19:2;O )	-	C19H34O3	311.258	21.16	FA	Fatty Acyls [FA]	0	-	-	2710	2510	2300	2790
( FA 19:2;O , FA 19:2;O )	-	C19H34O3	311.258	25.34	FA	Fatty Acyls [FA]	0.5	-	-	1440	1390	1300	1260
( FA 19:1 , FA 19:1 , FA 19:1 , FA 19:1 , FA 19:1 , FA 19:1 , FA 19:1 , FA 19:1 , FA 19:1 , FA 19:1 , FA 19:1 , FA 19:1 , FA 19:1 , FA 19:1 , FA 19:1 , FA 19:1 , FA 19:1 , FA 19:1 , FA 19:1 , FA 19:1 , FA 19:1 , FA 19:1 , FA 19:1 , FA 19:1 , FA 19:1 , FA 19:1 , WE 19:1 , WE 19:1 , WE 19:1 , WE 19:1 )	-	C19H36O2	297.278	23.49	FA	Fatty Acyls [FA]	0.1	-	-	1360	1050	1120	1020
( FA 18:2;O , FA 18:2;O , FA 18:2;O , FA 18:2;O , FA 18:2;O , FA 18:2;O , FA 18:2;O , FA 18:2;O , FA 18:2;O , FA 18:2;O , FA 18:2;O , FA 18:2;O , FA 18:2;O , FA 18:2;O , FA 18:2;O , FA 18:2;O , FA 18:2;O , FA 18:2;O , FA 18:2;O , FA 18:2;O , FA 18:2;O , FA 18:2;O , FA 18:2;O , FA 18:2;O , FA 18:2;O , FA 18:2;O , FA 18:2;O , FA 18:2;O , FA 18:2;O , FA 18:2;O , FA 18:2;O , FA 18:2;O , FA 18:2;O , F…	-	C18H32O3	314.271	20.61	FA	Fatty Acyls [FA]	3	-	-	658	622	779	746
( FA 18:0 , FA 18:0 , FA 18:0 , FA 18:0 , FA 18:0 , FA 18:0 , FA 18:0 , FA 18:0 , FA 18:0 , FA 18:0 , FA 18:0 , FA 18:0 , FA 18:0 , FA 18:0 , FA 18:0 , WE 18:0 , WE 18:0 , WE 18:0 , WE 18:0 , WE 18:0 , WE 18:0 , WE 18:0 , WE 18:0 , WE 18:0 , WE 18:0 , WE 18:0 , WE 18:0 )	-	C18H36O2	285.28	0.06	FA	Fatty Acyls [FA]	3.3	-	-	1380	1200	965	695
( FA 18:0 , FA 18:0 , FA 18:0 , FA 18:0 , FA 18:0 , FA 18:0 , FA 18:0 , FA 18:0 , FA 18:0 , FA 18:0 , FA 18:0 , FA 18:0 , FA 18:0 , FA 18:0 , FA 18:0 , WE 18:0 , WE 18:0 , WE 18:0 , WE 18:0 , WE 18:0 , WE 18:0 , WE 18:0 , WE 18:0 , WE 18:0 , WE 18:0 , WE 18:0 , WE 18:0 )	-	C18H36O2	285.279	24.15	FA	Fatty Acyls [FA]	0.4	-	-	3100	2620	2290	1970
( FA 17:3;O , FA 17:3;O , FA 17:3;O , FA 17:3;O , FA 17:3;O , FA 17:3;O , FA 17:3;O , FA 17:3;O , FOH 17:4;O2 )	-	C17H28O3	298.242	19.86	FA	Fatty Acyls [FA]	2	-	-	1100	935	664	654
( FA 17:2;O5 ,)	-	C17H30O7	364.229	18.35	FA	Fatty Acyls [FA]	0.2	-	-	4410	4660	3040	2820
( FA 17:1;O , FA 17:1;O , FA 17:1;O , FA 17:1;O , FA 17:1;O , FA 17:1;O , FOH 17:2;O2 , FOH 17:2;O2 , FA 17:1;O )	-	C17H32O3	285.243	24.96	FA	Fatty Acyls [FA]	1.5	-	-	569	709	571	676
( FA 17:0;O , FA 17:0;O , FA 17:0;O , FA 17:0;O , FA 17:0;O , FA 17:0;O , FOH 17:1;O2 )	-	C17H34O3	304.287	23.24	FA	Fatty Acyls [FA]	2.6	-	-	378	389	349	305
( FA 16:2;O5 ,)	-	C16H28O7	350.217	17.96	FA	Fatty Acyls [FA]	1.7	-	-	3570	3700	31600	2510
( FA 16:1 , FA 16:1 , FA 16:1 , FA 16:1 , FA 16:1 , FA 16:1 , FA 16:1 , FA 16:1 , FA 16:1 , FA 16:1 , FA 16:1 , FA 16:1 , FA 16:1 , FA 16:1 , FA 16:1 , FA 16:1 , FA 16:1 , FA 16:1 , FA 16:1 , FA 16:1 , FA 16:1 , FA 16:1 , FA 16:1 , FA 16:1 , FA 16:1 , FA 16:1 , FA 16:1 , WE 16:1 , WE 16:1 , WE 16:1 , WE 16:1 , WE 16:1 , WE 16:1 , WE 16:1 , WE 16:1 , WE 16:1 , WE 16:1 , WE 16:1 , WE 16:1 , WE 16:1…	-	C16H30O2	272.258	28.76	FA	Fatty Acyls [FA]	0.2	-	-	505	472	454	482
( FA 16:0;O , FA 16:0;O , FA 16:0;O , FA 16:0;O , FA 16:0;O , FA 16:0;O , FA 16:0;O , FA 16:0;O , FA 16:0;O , FA 16:0;O , FA 16:0;O , FA 16:0;O , FA 16:0;O , FA 16:0;O , FA 16:0;O , FA 16:0;O , FA 16:0;O , FA 16:0;O , FA 16:0;O , FA 16:0;O , FA 16:0;O )	-	C16H32O3	290.269	21.15	FA	Fatty Acyls [FA]	3.1	-	-	1690	1610	1250	1140
( FA 16:0 , FA 16:0 , FA 16:0 , FA 16:0 , FA 16:0 , FA 16:0 , FA 16:0 , FA 16:0 , FA 16:0 , FA 16:0 , FA 16:0 , FA 16:0 , FA 16:0 , FA 16:0 , FA 16:0 , FA 16:0 , FA 16:0 , FA 16:0 , FA 16:0 , FA 16:0 , FA 16:0 , FA 16:0 , FAL 16:0;O , WE 16:0 , WE 16:0 , WE 16:0 , WE 16:0 , WE 16:0 , WE 16:0 , WE 16:0 , WE 16:0 , WE 16:0 , WE 16:0 )	-	C16H32O2	257.248	0.06	FA	Fatty Acyls [FA]	1.4	-	-	483	439	348	295
( FA 14:7 ,)	-	C14H14O2	232.13	18.89	FA	Fatty Acyls [FA]	5.4	-	-	533	561	123	857
( FA 13:2 , FA 13:2 , FA 13:2 , FA 13:2 , FA 13:2 , FA 13:2 , FA 13:2 , FA 13:2 , FA 13:2 , FA 13:2 , FA 13:2 , FA 13:2 , WE 13:2 , WE 13:2 , WE 13:2 , WE 13:2 , WE 13:2 , WE 13:2 , WE 13:2 , WE 13:2 )	-	C13H22O2	228.196	17.2	FA	Fatty Acyls [FA]	0.6	-	-	1060	1090	1340	1360
( FA 13:2 , FA 13:2 , FA 13:2 , FA 13:2 , FA 13:2 , FA 13:2 , FA 13:2 , FA 13:2 , FA 13:2 , FA 13:2 , FA 13:2 , FA 13:2 , WE 13:2 , WE 13:2 , WE 13:2 , WE 13:2 , WE 13:2 , WE 13:2 , WE 13:2 , WE 13:2 )	-	C13H22O2	228.206	21.59	FA	Fatty Acyls [FA]	1.1	-	-	533	551	1190	1080
( FA 13:1;O2 , FA 13:1;O2 , FA 13:1;O2 , FA 13:1;O2 , FA 13:1;O2 , FA 13:1;O2 , FA 13:1;O2 )	-	C13H24O4	245.175	19.45	FA	Fatty Acyls [FA]	0.7	-	-	1540	1610	513	516
( FA 12:6;O ,)	-	C12H12O3	205.087	20.03	FA	Fatty Acyls [FA]	1.5	-	-	7420	6820	4740	4800
( FA 11:3;O3 , FOH 11:4;O4 )	-	C11H16O5	246.133	18.93	FA	Fatty Acyls [FA]	1.4	-	-	849	981	171	147
( DGTS 32:0 ,)	-	C42H81NO7	712.609	0.06	DAG	Glycerolipids [GL]	0.8	-	-	413	366	282	187
( DGMG 18:3 ,)	-	C33H56O14	694.395	19.13	DAG	Glycerolipids [GL]	7.6	-	-	21900	22100	16800	16300
( DGCC 36:5 ,)	-	C46H79NO8	774.584	20.89	DAG	Glycerolipids [GL]	3.4	-	-	3220	3220	3410	2830
( DG O-34:1 ,)	-	C37H72O4	581.546	27.3	DAG	Glycerolipids [GL]	5.3	-	-	3160	3150	3340	2980
( DG O-32:2 ,)	-	C35H66O4	568.533	26.79	DAG	Glycerolipids [GL]	2	-	-	1850	1750	2060	2060
( DG O-32:2 ,)	-	C35H66O4	551.505	26.43	DAG	Glycerolipids [GL]	0.1	-	-	7670	7710	8490	7450
( DG dO-40:9 , DG dO-40:9 )	-	C43H70O3	652.558	26.35	DAG	Glycerolipids [GL]	7.9	-	-	2290	2360	2430	2330
( DG 43:5 ,)	-	C46H80O5	713.605	26.27	DAG	Glycerolipids [GL]	0.5	-	-	1860	1730	1790	1730
( DG 43:2 ,)	-	C46H86O5	736.68	29.01	DAG	Glycerolipids [GL]	0.8	-	-	443	517	593	409
( DG 40:6 , DG 40:6 , DG 40:6 , DG 40:6 , DG 40:6 , DG 40:6 , DG 40:6 , DG 40:6 , DG 40:6 )	-	C43H72O5	686.564	25.11	DAG	Glycerolipids [GL]	9.4	-	-	7880	7800	8080	7730
( DG 39:5 , DG 39:5 , DG 39:5 , DG 39:5 , DG 39:5 )	-	C42H72O5	674.57	24.85	DAG	Glycerolipids [GL]	0.9	-	-	1750	1790	1640	1550
( DG 36:3 , DG 36:3 , DG 36:3 , DG 36:3 , DG 36:3 , DG 36:3 , DG 36:3 , DG 36:3 )	-	C39H70O5	619.533	0.06	DAG	Glycerolipids [GL]	2.3	-	-	323	344	322	254
( DG 34:1 , DG 34:1 , DG 34:1 , DG 34:1 , DG 34:1 , DG 34:1 , DG 34:1 , DG 34:1 , DG 34:1 , DG 34:1 )	-	C37H70O5	612.555	0.06	DAG	Glycerolipids [GL]	0.3	-	-	1140	1030	834	624
( DG 33:0 , DG 33:0 , DG 33:0 , DG 33:0 , DG 33:0 )	-	C36H70O5	583.525	26.66	DAG	Glycerolipids [GL]	7.2	-	-	2210	1970	2200	1980
( DG 32:0 , DG 32:0 , DG 32:0 , DG 32:0 , DG 32:0 , DG 32:0 )	-	C35H68O5	586.539	0.06	DAG	Glycerolipids [GL]	1.7	-	-	1330	1120	924	754
( CoA 9:0 ,)	-	C30H52N7O17P3S	925.271	24.01	CoA	Fatty Acyls [FA]	1.2	-	-	36700	35700	40400	35600
( CoA 6:2;O5 ,)	-	C27H42N7O22P3S	942.133	27.75	CoA	Fatty Acyls [FA]	1.5	-	-	98	328	100	379
( CoA 5:1;O3 , CoA 5:1;O3 , CoA 5:1;O3 )	-	C26H42N7O20P3S	898.158	20.82	CoA	Fatty Acyls [FA]	4.9	-	-	32.2	33.6	45.7	37.4
( CoA 16:1;O3 ,)	-	C37H64N7O20P3S	1069.34	32.15	CoA	Fatty Acyls [FA]	4.4	-	-	430	428	431	391
( CoA 12:2 , CoA 12:2 , CoA 12:2 )	-	C33H54N7O17P3S	946.255	31.99	CoA	Fatty Acyls [FA]	1.1	-	-	189	174	223	214
( CoA 12:1 , CoA 12:1 , CoA 12:1 )	-	C33H56N7O17P3S	948.274	28.49	CoA	Fatty Acyls [FA]	0.1	-	-	90	90.9	109	83
( CoA 11:0 , CoA 11:0 )	-	C32H56N7O17P3S	936.282	36.14	CoA	Fatty Acyls [FA]	0.6	-	-	54.3	48.7	60.3	49.2
( CoA 10:2 , CoA 10:2 , CoA 10:2 , CoA 10:2 )	-	C31H50N7O17P3S	918.235	27.4	CoA	Fatty Acyls [FA]	4.5	-	-	71.2	81.5	77.3	72.2
( CoA 10:0 , CoA 10:0 )	-	C31H54N7O17P3S	939.285	25.2	CoA	Fatty Acyls [FA]	0.4	-	-	12200	11800	9670	8560
( CL 80:3 , CL 80:4 , CL 80:4 , CL 80:4 , CL 80:4 )	-	C89H166O17P2	1570.16	24.42	CL	Glycerophospholipids [GP]	1.4	-	-	363	277	238	196
( CL 76:6 , CL 76:6 , CL 76:6 , CL 76:6 , CL 76:6 , CL 76:6 , CL 76:6 , CL 76:6 , CL 76:6 , CL 76:6 , CL 76:6 , CL 76:6 , CL 76:6 , CL 76:6 , CL 76:6 , CL 76:6 , CL 76:6 , CL 76:6 , CL 76:6 , CL 76:6 , CL 76:6 , CL 76:6 , CL 76:6 , CL 76:6 , CL 76:6 , CL 76:6 , CL 76:6 , CL 76:6 , CL 76:6 , CL 76:6 , CL 76:6 , CL 76:6 , CL 76:6 , CL 76:6 , CL 76:6 , CL 76:6 )	-	C85H154O17P2	1527.11	24.38	CL	Glycerophospholipids [GP]	5.1	-	-	686	584	547	483
( Cer 42:2;O ,)	-	C42H81NO2	649.66	22.86	CER	Sphingolipids [SP]	0	-	-	164	154	210	201
( Cer 42:1;O , Cer 42:1;O )	-	C42H83NO2	634.646	36.49	CER	Sphingolipids [SP]	4.2	-	-	2060	2240	2210	2010
( Cer 40:1;O ,)	-	C40H79NO2	606.615	31.21	CER	Sphingolipids [SP]	4.7	-	-	5750	5200	5460	5180
( Cer 40:1;O ,)	-	C40H79NO2	606.616	34.63	CER	Sphingolipids [SP]	2.3	-	-	7500	7210	8300	7260
( Cer 40:0;O3 , Cer 40:0;O3 , Cer 40:0;O3 , Cer 40:0;O3 )	-	C40H81NO4	640.624	29.27	CER	Sphingolipids [SP]	0.3	-	-	7690	7180	8070	6480
( Cer 38:2;O2 , Cer 38:2;O2 , Cer 38:2;O2 , Cer 38:2;O2 , Cer 38:2;O2 )	-	C38H73NO3	592.564	0.07	CER	Sphingolipids [SP]	1.3	-	-	770	630	551	439
( Cer 38:1;O ,)	-	C38H75NO2	578.585	29.26	CER	Sphingolipids [SP]	3	-	-	14600	13600	13300	13300
( Cer 38:1;O ,)	-	C38H75NO2	578.586	32.93	CER	Sphingolipids [SP]	0.4	-	-	16600	18000	19900	17900
( Cer 38:0;O ,)	-	C38H77NO2	580.6	34.39	CER	Sphingolipids [SP]	1.8	-	-	10200	10900	11600	10200
( Cer 37:2;O3 , Cer 37:2;O3 )	-	C37H71NO4	611.563	28.21	CER	Sphingolipids [SP]	2.3	-	-	763	718	2010	1730
( Cer 36:1;O2 , Cer 36:1;O2 , Cer 36:1;O2 , Cer 36:1;O2 )	-	C36H71NO3	566.552	0.06	CER	Sphingolipids [SP]	0.2	-	-	1470	1300	1100	813
( Cer 36:1;O ,)	-	C36H71NO2	550.548	27.07	CER	Sphingolipids [SP]	3.6	-	-	26500	27100	25100	25200
( Cer 36:1;O ,)	-	C36H71NO2	550.556	31.39	CER	Sphingolipids [SP]	0.2	-	-	35000	36300	39800	35800
( Cer 36:0;O ,)	-	C36H73NO2	552.569	29.06	CER	Sphingolipids [SP]	3.7	-	-	14800	13100	13300	11500
( Cer 36:0;O ,)	-	C36H73NO2	552.57	32.67	CER	Sphingolipids [SP]	1.7	-	-	19200	19900	21900	19000
( Cer 35:1;O2 , Cer 35:1;O2 )	-	C35H69NO3	569.565	25.73	CER	Sphingolipids [SP]	3.8	-	-	355	311	294	316
( Cer 34:3;O3 , Cer 34:3;O3 )	-	C34H63NO4	567.515	25.66	CER	Sphingolipids [SP]	8.6	-	-	3700	3990	3640	3620
( Cer 34:1;O2 , Cer 34:1;O2 , Cer 34:1;O2 )	-	C34H67NO3	538.523	0.06	CER	Sphingolipids [SP]	5.4	-	-	840	703	576	464
( Cer 34:1;O ,)	-	C34H67NO2	522.524	30.04	CER	Sphingolipids [SP]	0.2	-	-	16300	15300	16700	13900
( Cer 34:0;O ,)	-	C34H69NO2	541.569	29.1	CER	Sphingolipids [SP]	4.3	-	-	1170	998	1130	945
( Cer 32:2;O3 , Cer 32:2;O3 )	-	C32H61NO4	541.495	25.49	CER	Sphingolipids [SP]	0	-	-	5790	5540	5630	5280
( CE 22:3 ,)	-	C49H82O2	720.661	39.25	CE	Sterol Lipids [ST]	2.7	-	-	2940	2910	3390	2850
( CE 20:1 ,)	-	C47H82O2	696.665	28.49	CE	Sterol Lipids [ST]	0.6	-	-	391	567	570	436
( CE 16:3 ,)	-	C43H70O2	636.573	23.44	CE	Sterol Lipids [ST]	0.1	-	-	2230	2290	2410	2040
( CDP-DG 40:4 , CDP-DG 40:4 )	-	C52H89N3O15P2	1058.59	19.16	CDP-DG	Glycerophospholipids [GP]	0.5	-	-	4180	4340	3240	2830
( CDP-DG 34:1 , CDP-DG 34:1 , CDP-DG 34:1 , CDP-DG 34:1 )	-	C46H83N3O15P2	980.542	18.73	CDP-DG	Glycerophospholipids [GP]	4.7	-	-	4780	7200	5890	5790
( CDP-DG 24:0 ,)	-	C36H65N3O15P2	842.401	18.33	CDP-DG	Glycerophospholipids [GP]	1	-	-	127	589	188	161
( CAR 5:1 , CAR 5:1 )	-	C12H21NO4	261.18	19.72	CAR	Fatty Acyls [FA]	1.1	-	-	1530	1620	449	351
( CAR 22:0 ,)	-	C29H57NO4	501.461	29.77	CAR	Fatty Acyls [FA]	0.3	-	-	1150	1120	1270	1130
( CAR 18:3 ,)	-	C25H43NO4	439.346	22.11	CAR	Fatty Acyls [FA]	2.3	-	-	2700	5610	10300	5750
( CAR 18:2 , CAR 18:2 , CAR 18:2 )	-	C25H45NO4	441.369	23	CAR	Fatty Acyls [FA]	2.6	-	-	10800	10100	10100	15900
( CAR 16:0 , CAR 16:0 , CAR 16:0 )	-	C23H45NO4	417.369	22.93	CAR	Fatty Acyls [FA]	0.2	-	-	4240	4040	4050	3720

## Sheet: Supplementary Table9
Table S9: lipids identified in MEF by SMFinder
Lipid Groups	Lipid name	Chemical formula	mz	rt	Lipid Class	Category	ppm	MS2_score	MS2_FDR	MEF_sample1 area	MEF_saple1r area	MEF_sample2 area	MEF_sample2r area
Triethylene glycol bis(2-ethylhexanoate)	Triethylene glycol bis(2-ethylhexanoate)	C22H42O6	420.329	19.17		Fatty Acyls [FA]	1.8	0.92	0.072	4700	4860	8500	11900
TAG (18:0-18:1-18:1)	TAG (18:0-18:1-18:1)	C57H106O6	904.827	36.94	TAG	Glycerolipids [GL]	6.7	0.91	0.002	11000	11400	9770	10600
TAG (15:0-18:1-18:2)	TAG (15:0-18:1-18:2)	C54H98O6	860.765	33.26	TAG	Glycerolipids [GL]	4.2	0.63	0.002	17200	17100	13700	20600
TAG (15:0-18:1-18:1)	TAG (15:0-18:1-18:1)	C54H100O6	862.783	34.38	TAG	Glycerolipids [GL]	2.3	0.77	0.002	30800	31100	24300	39400
(TAG 14:0-16:1-18:1)	(TAG 14:0-16:1-18:1)	C51H94O6	820.737	31.92	TAG	Glycerolipids [GL]	0.3	0.87	0.002	72700	75900	51100	88400
TAG (12:0-12:0-18:1)	TAG (12:0-12:0-18:1)	C45H84O6	738.657	28.69	TAG	Glycerolipids [GL]	4.6	0.52	0.002	7660	7570	3850	10100
TAG (10:0-18:1-18:2)	TAG (10:0-18:1-18:2)	C49H88O6	790.686	29.59	TAG	Glycerolipids [GL]	5.7	0.46	0.004	8410	8440	5640	10700
Tirucallol	Tirucallol	C30H50O	444.412	22.76		Sterol Lipids [ST]	0.6	0.05	0.204	23500	22800	35200	76000
TAG(18:1/18:1/18:1)	TAG(18:1/18:1/18:1)	C57H104O6	902.814	35.32	TAG	Glycerolipids [GL]	3.1	0.74	0.002	15700	15500	12000	6850
TAG(18:1/14:0/18:3)	TAG(18:1/14:0/18:3)	C53H94O6	844.732	31.65	TAG	Glycerolipids [GL]	6	0.13	0.026	8340	13100	7580	11200
TAG(16:1/18:1/18:1)	TAG(16:1/18:1/18:1)	C55H100O6	874.782	34.06	TAG	Glycerolipids [GL]	3.4	0.66	0.002	25600	26900	22700	32500
TAG(16:1/16:1/18:1)	TAG(16:1/16:1/18:1)	C53H96O6	846.751	32.47	TAG	Glycerolipids [GL]	2.2	0.64	0.002	35600	34700	29500	44900
TAG(16:1/16:1/16:1)	TAG(16:1/16:1/16:1)	C51H92O6	818.719	30.96	TAG	Glycerolipids [GL]	3.5	0.74	0.002	24600	24800	17500	30200
TAG(16:1/14:0/17:1)	TAG(16:1/14:0/17:1)	C50H92O6	806.721	31.08	TAG	Glycerolipids [GL]	2	0.69	0.002	44400	45500	29700	53800
TAG(16:1/14:0/16:1)	TAG(16:1/14:0/16:1)	C49H90O6	792.704	30.41	TAG	Glycerolipids [GL]	2.4	0.8	0.002	38300	39200	24500	45400
TAG(16:0/18:1/18:1)	TAG(16:0/18:1/18:1)	C55H102O6	876.8	35.26	TAG	Glycerolipids [GL]	0.3	0.81	0.002	42700	43900	37100	56900
TAG(16:0/16:1/18:1)	TAG(16:0/16:1/18:1)	C53H98O6	848.768	33.52	TAG	Glycerolipids [GL]	0.4	0.68	0.002	65600	69900	49300	79800
TAG(16:0/16:1/17:1)	TAG(16:0/16:1/17:1)	C52H96O6	834.752	32.66	TAG	Glycerolipids [GL]	1.3	0.73	0.002	57700	53400	42700	66900
TAG(16:0/16:0/16:1)	TAG(16:0/16:0/16:1)	C51H96O6	822.753	32.96	TAG	Glycerolipids [GL]	0.8	0.88	0.002	90200	83600	55000	92200
TAG(16:0/14:0/16:1)	TAG(16:0/14:0/16:1)	C49H92O6	794.721	31.34	TAG	Glycerolipids [GL]	2.1	0.55	0.002	62700	66100	35100	68900
TAG(16:0/14:0/14:1)	TAG(16:0/14:0/14:1)	C47H88O6	766.689	29.86	TAG	Glycerolipids [GL]	3.1	0.8	0.002	26100	26000	13900	30200
TAG(16:0/13:0/14:0)	TAG(16:0/13:0/14:0)	C46H88O6	754.688	29.92	TAG	Glycerolipids [GL]	4.2	0.82	0.002	19400	18700	8370	17000
TAG(16:0/12:0/14:0)	TAG(16:0/12:0/14:0)	C45H86O6	740.671	29.45	TAG	Glycerolipids [GL]	5.9	0.76	0.002	13200	13200	5970	12500
TAG(15:0/16:0/16:1)	TAG(15:0/16:0/16:1)	C50H94O6	808.737	32.04	TAG	Glycerolipids [GL]	1.5	0.77	0.002	70000	69900	41200	76600
TAG(15:0/14:0/16:1)	TAG(15:0/14:0/16:1)	C48H90O6	780.705	30.51	TAG	Glycerolipids [GL]	2.4	0.77	0.002	37700	38800	20700	43000
TAG(15:0/14:0/16:0)	TAG(15:0/14:0/16:0)	C48H92O6	782.72	31.44	TAG	Glycerolipids [GL]	3.8	0.85	0.002	40800	41700	17200	33200
TAG 59:9	TAG 59:9	C62H102O6	960.799	34.53	TAG	Glycerolipids [GL]	2	0.58	0.168	1640	1730	647	1090
TAG 59:12	TAG 59:12	C62H96O6	954.75	32.21	TAG	Glycerolipids [GL]	1.2	0.58	0.17	3710	3500	1460	1650
TAG 51:6	TAG 51:6	C54H92O6	837.699	24.87	TAG	Glycerolipids [GL]	2	0.58	0.16	937	2100	3350	6500
TAG 49:3	TAG 49:3	C52H94O6	832.734	31.65	TAG	Glycerolipids [GL]	3.8	0.66	0.092	17800	18800	14100	23400
TAG 47:3	TAG 47:3	C50H90O6	804.702	30.2	TAG	Glycerolipids [GL]	5.4	0.82	0.066	9860	9980	7210	12400
TAG 45:2	TAG 45:2	C48H88O6	778.688	29.68	TAG	Glycerolipids [GL]	2.9	0.88	0.08	17300	17500	10900	21400
TAG 44:2	TAG 44:2	C47H86O6	764.671	29.07	TAG	Glycerolipids [GL]	5.3	0.86	0.054	10700	10900	7220	13700
TAG 43:2	TAG 43:2	C46H84O6	750.657	28.55	TAG	Glycerolipids [GL]	3.8	0.71	0.056	4480	4530	2550	6220
TAG 43:1	TAG 43:1	C46H86O6	752.672	29.08	TAG	Glycerolipids [GL]	4	0.67	0.044	12300	12500	7290	16000
TAG 42:2	TAG 42:2	C45H82O6	736.641	27.96	TAG	Glycerolipids [GL]	1	0.97	0.082	2310	2680	1940	3980
TAG 41:0	TAG 41:0	C44H84O6	726.656	28.73	TAG	Glycerolipids [GL]	5	0.97	0.05	7440	7190	2910	8170
Sphinganine	Sphinganine	C18H39NO2	302.303	21.53		Sphingolipids [SP]	4.5	0.32	0.006	1820	1640	1010	3300
SM d42:2	SM d42:2	C47H93N2O6P	813.681	23.99	SM	Sphingolipids [SP]	1.4	1	0.13	43200	43400	78800	64400
SM d42:1	SM d42:1	C47H95N2O6P	815.697	24.89	SM	Sphingolipids [SP]	1.5	1	0.144	21800	22600	37900	38400
SM d40:1	SM d40:1	C45H91N2O6P	787.661	23.96	SM	Sphingolipids [SP]	7.3	0.99	0.136	8060	8210	16500	13900
SM d34:2	SM d34:2	C39H77N2O6P	701.553	21.5	SM	Sphingolipids [SP]	7.7	0.99	0.13	6540	6760	5300	4620
SM d31:2	SM d31:2	C44H66O4	659.502	24.82	SM	Sphingolipids [SP]	5.6	0	1	2830	2940	1840	1090
SHexCer d42:1	SHexCer d42:1	C48H93NO11S	892.648	18.87	HexCER	Sphingolipids [SP]	5.8	0.2	0.468	4580	4840	1750	11200
SHexCer d40:1	SHexCer d40:1	C46H89NO11S	864.624	17.94	HexCER	Sphingolipids [SP]	0.6	0.56	0.172	332000	321000	214000	229000
S4:18(P3:16/F1:2)	S4:18(P3:16/F1:2)	C29H48O15	637.302	19.65		-	5.4	0.08	0.534	1750	1950	3390	3510
S4:18(P3:16/F1:2)	S4:18(P3:16/F1:2)	C29H48O15	654.332	19.65		-	0.2	0.08	0.538	7620	8560	15500	14900
Pterosin A	Pterosin A	C14H18O3	252.159	18.59		Fatty Acyls [FA]	0.8	0.96	0.158	300	310	1270	551
PS(18:0/20:0)	PS(18:0/20:0)	C44H86NO10P	820.599	17.98	PS	Glycerophospholipids [GP]	7.4	0.15	0.136	410000	396000	304000	57600
PS 49:5	PS 49:5	C55H98NO10P	964.699	19.03	PS	Glycerophospholipids [GP]	1.8	0.2	0.332	681	678	1860	5280
PS 47:5	PS 47:5	C53H94NO10P	936.674	18.8	PS	Glycerophospholipids [GP]	3.6	0.2	0.306	3600	3710	1230	7830
PS 43:6	PS 43:6	C49H84NO10P	878.599	17.89	PS	Glycerophospholipids [GP]	8.1	0.2	0.196	25300	24200	16600	16900
PS 40:6	PS 40:6	C46H78NO10P	836.538	22.06	PS	Glycerophospholipids [GP]	4.7	0.98	0.02	2160	2320	1510	2280
PS 38:5	PS 38:5	C44H76NO10P	810.527	21.92	PS	Glycerophospholipids [GP]	0.2	0.77	0.04	1000	909	558	990
PS 36:4	PS 36:4	C42H74NO10P	784.508	21.82	PS	Glycerophospholipids [GP]	2.9	0.98	0.154	736	824	585	782
PS 36:1	PS 36:1	C42H80NO10P	790.559	22.39	PS	Glycerophospholipids [GP]	1.3	0.98	0.022	15200	16200	15500	22600
PS 35:1	PS 35:1	C41H78NO10P	776.541	24.18	PS	Glycerophospholipids [GP]	1.5	0.83	0.058	2490	4220	1540	1690
PS 34:1	PS 34:1	C40H76NO10P	762.524	21.83	PS	Glycerophospholipids [GP]	3.8	0.98	0.05	4620	4980	4170	6570
PS 31:0	PS 31:0	C37H72NO10P	722.497	18.24	PS	Glycerophospholipids [GP]	0.7	0.2	0.296	14900	14400	20200	10200
PS 20:0	PS 20:0	C26H50NO10P	568.329	16.25	PS	Glycerophospholipids [GP]	6.8	0.66	0.288	18800	18500	12600	16600
Pristanic acid	Pristanic acid	C19H38O2	316.319	22.21	FA	Fatty Acyls [FA]	4.4	0.06	0.266	1880	1870	2330	2200
PMeOH 43:1	PMeOH 43:1	C47H91O8P	815.646	31.32	PEMeOH	Glycerophospholipids [GP]	7.7	0.12	0.3	4150	4080	2650	3820
PMeOH 34:6	PMeOH 34:6	C38H63O8P	679.43	26.57	PEMeOH	Glycerophospholipids [GP]	4.8	0.98	0.138	33400	33400	12900	24700
PMeOH 30:2	PMeOH 30:2	C34H63O8P	648.464	19.34	PEMeOH	Glycerophospholipids [GP]	2.5	0.99	0.152	1560	1580	1690	5130
PMeOH 28:1	PMeOH 28:1	C32H61O8P	605.416	18.58	PEMeOH	Glycerophospholipids [GP]	0.7	0.03	0.844	5720	5560	2930	1470
PI(18:1/20:4)	PI(18:1/20:4)	C47H81O13P	885.546	17.93	PI	Glycerophospholipids [GP]	1.2	0.69	0.002	13800	13800	5400	6100
PI(18:1/20:4)	PI(18:1/20:4)	C47H81O13P	885.555	21.72	PI	Glycerophospholipids [GP]	0.7	0.69	0.004	1610	1560	1400	1640
PI(18:1/20:3)	PI(18:1/20:3)	C47H83O13P	904.588	21.79	PI	Glycerophospholipids [GP]	4	0.68	0.002	3010	3260	2390	3720
PI(16:0/20:3)	PI(16:0/20:3)	C45H81O13P	878.578	20.46	PI	Glycerophospholipids [GP]	0.1	0.53	0.02	10500	11700	5250	3290
PI(16:0/18:1)	PI(16:0/18:1)	C43H81O13P	837.543	21.64	PI	Glycerophospholipids [GP]	5.7	0.71	0.002	2620	2830	2170	3140
Phenothrin	Phenothrin	C16H30O8	368.226	15.71		Fatty Acyls [FA]	4.1	0	1	3590	3270	858	1180
PG(18:2(9Z,12Z)/18:2(9Z,12Z))	PG(18:2(9Z,12Z)/18:2(9Z,12Z))	C42H75O10P	788.538	22	PG	Glycerophospholipids [GP]	6.8	0.57	0.008	4780	5050	4620	7320
PG(18:1(9Z)/18:1(9Z))	PG(18:1(9Z)/18:1(9Z))	C42H79O10P	792.573	22.8	PG	Glycerophospholipids [GP]	0.4	0.46	0.026	12500	12200	12900	12600
PG(18:1(9Z)/18:1(9Z))	PG(18:1(9Z)/18:1(9Z))	C42H79O10P	775.54	22.06	PG	Glycerophospholipids [GP]	7.3	0.44	0.038	1880	1810	913	1590
PG(16:0/18:1(11Z))	PG(16:0/18:1(11Z))	C40H77O10P	749.528	21.88	PG	Glycerophospholipids [GP]	6.4	0.22	0.128	1080	1280	3040	2330
PEtOH 42:2	PEtOH 42:2	C47H89O8P	813.636	30.41	PEtOH	Glycerophospholipids [GP]	0.7	0.12	0.346	2470	2640	2040	2910
PE(16:1(9Z)/18:0)	PE(16:1(9Z)/18:0)	C39H76NO8P	718.535	21.7	PE	Glycerophospholipids [GP]	2.2	0.02	0.022	3310	4600	3810	2530
PE 46:10	PE 46:10	C51H82NO8P	868.588	21.8	PE	Glycerophospholipids [GP]	2.5	0.16	0.746	1040	967	988	1600
PE 40:8e	PE 40:8e	C45H76NO7P	774.547	18.71	PE	Glycerophospholipids [GP]	5.9	0.08	0.87	8590	8330	4830	6840
PE 38:6e	PE 38:6e	C43H76NO7P	750.532	23.48	PE	Glycerophospholipids [GP]	0.1	0.84	0.098	16000	16300	10000	14900
PE 38:4e	PE 38:4e	C43H80NO7P	754.578	23.54	PE	Glycerophospholipids [GP]	4	0.79	0.22	3120	3600	3340	4340
PE 37:5e	PE 37:5e	C42H76NO7P	738.542	23.11	PE	Glycerophospholipids [GP]	4.2	0.84	0.086	1580	1690	1080	1240
PE 36:5e	PE 36:5e	C41H74NO7P	724.524	22.75	PE	Glycerophospholipids [GP]	0.3	0.84	0.116	10000	10400	8050	10500
PE 36:4e	PE 36:4e	C41H76NO7P	726.54	22.96	PE	Glycerophospholipids [GP]	2.6	0.94	0.016	4310	4350	3490	3130
PE 34:3e	PE 34:3e	C39H74NO7P	700.525	22.68	PE	Glycerophospholipids [GP]	0.1	0.84	0.092	1690	1520	1440	1370
PE 20:5e	PE 20:5e	C25H42NO7P	500.277	18.28	PE	Glycerophospholipids [GP]	1.2	0.84	0.188	779	838	534	452
PC(P-18:0/18:1(9Z))	PC(P-18:0/18:1(9Z))	C44H86NO7P	772.618	23.28	PC	Glycerophospholipids [GP]	2.9	0.89	0.018	79000	80400	58500	43500
PC(18:1(9E)/18:1(9E))	PC(18:1(9E)/18:1(9E))	C44H84NO8P	786.601	22.75	PC	Glycerophospholipids [GP]	0.3	0.93	0.01	306000	332000	342000	256000
PC(14:0/18:0)	PC(14:0/18:0)	C40H80NO8P	734.566	22.4	PC	Glycerophospholipids [GP]	0.5	0.93	0.002	42800	51200	82800	47000
PC 8:0	PC 8:0	C16H32NO8P	415.214	17.15	PC	Glycerophospholipids [GP]	4.8	0	1	45100	43400	63000	37700
PC 45:0	PC 45:0	C53H106NO8P	916.779	29.5	PC	Glycerophospholipids [GP]	4.5	0.29	0.232	3920	3900	1880	4740
PC 44:10	PC 44:10	C52H84NO8P	882.607	22.06	PC	Glycerophospholipids [GP]	3.6	0.95	0.158	10100	10300	11800	18900
PC 43:6	PC 43:6	C51H90NO8P	876.65	19.42	PC	Glycerophospholipids [GP]	0.2	0.29	0.19	1230	1080	2170	5750
PC 42:11	PC 42:11	C50H78NO8P	852.557	21.21	PC	Glycerophospholipids [GP]	3.6	0.95	0.178	1700	1670	1240	1850
PC 42:10	PC 42:10	C50H80NO8P	854.574	17.97	PC	Glycerophospholipids [GP]	0.5	0.29	0.24	7470	6840	8160	2640
PC 41:6	PC 41:6	C49H86NO8P	848.624	18.92	PC	Glycerophospholipids [GP]	6.5	0.29	0.232	6710	6710	2580	15600
PC 40:7	PC 40:7	C48H82NO8P	832.582	22.34	PC	Glycerophospholipids [GP]	0.3	0.96	0.018	5780	7220	9770	5140
PC 39:7e	PC 39:7e	C47H82NO7P	804.598	18.95	PC	Glycerophospholipids [GP]	8.1	0.2	0.496	10300	10100	3850	20900
PC 39:7	PC 39:7	C47H80NO8P	818.577	18.36	PC	Glycerophospholipids [GP]	0	0.29	0.166	6100	5770	3200	5060
PC 38:7	PC 38:7	C46H78NO8P	804.55	17.95	PC	Glycerophospholipids [GP]	2.7	0.29	0.224	6770	6580	3050	553
PC 38:6	PC 38:6	C46H80NO8P	806.564	21.42	PC	Glycerophospholipids [GP]	4.2	0.97	0.026	8200	9440	8570	11700
PC 38:5	PC 38:5	C46H82NO8P	808.58	22.57	PC	Glycerophospholipids [GP]	3.9	0.97	0.038	24100	26600	31500	19700
PC 38:1e	PC 38:1e	C46H92NO7P	802.668	24.66	PC	Glycerophospholipids [GP]	0.5	0.93	0.15	5440	5490	7600	7490
PC 37:4	PC 37:4	C45H82NO8P	813.612	23.08	PC	Glycerophospholipids [GP]	1.1	0.95	0.134	4940	5150	4740	3830
PC 37:2	PC 37:2	C45H86NO8P	800.616	23.09	PC	Glycerophospholipids [GP]	0.2	0.97	0.03	12900	14200	11300	9280
PC 37:1	PC 37:1	C45H88NO8P	802.625	23.51	PC	Glycerophospholipids [GP]	7.3	0.95	0.024	6110	7370	5730	5320
PC 36:5	PC 36:5	C44H78NO8P	780.55	22.09	PC	Glycerophospholipids [GP]	1.4	0.99	0.026	7810	8970	10600	6090
PC 36:3e	PC 36:3e	C44H84NO7P	770.6	23.14	PC	Glycerophospholipids [GP]	6.2	0.99	0.166	33400	33800	27700	24800
PC 36:3	PC 36:3	C44H82NO8P	784.583	22.4	PC	Glycerophospholipids [GP]	0.5	0.99	0.028	24700	29300	34400	19500
PC 36:1e	PC 36:1e	C44H88NO7P	774.632	23.88	PC	Glycerophospholipids [GP]	4.6	0.99	0.144	21800	23200	30600	22800
PC 35:5	PC 35:5	C43H76NO8P	766.544	22.57	PC	Glycerophospholipids [GP]	6	0.97	0.03	12500	12600	11500	13500
PC 35:1	PC 35:1	C43H84NO8P	774.598	22.86	PC	Glycerophospholipids [GP]	1.5	0.99	0.024	27100	29500	26300	20600
PC 34:4	PC 34:4	C42H76NO8P	754.541	22.04	PC	Glycerophospholipids [GP]	1.4	0.96	0.162	5290	6260	6670	3530
PC 34:2	PC 34:2	C42H80NO8P	758.569	22.18	PC	Glycerophospholipids [GP]	0.6	1	0.022	99200	113000	127000	65200
PC 34:1e	PC 34:1e	C42H84NO7P	746.601	23.09	PC	Glycerophospholipids [GP]	4.2	1	0.14	158000	171000	185000	127000
PC 33:1	PC 33:1	C41H80NO8P	763.592	22.29	PC	Glycerophospholipids [GP]	0.2	0.95	0.126	11400	12400	16700	1400
PC 32:2	PC 32:2	C40H76NO8P	730.543	21.7	PC	Glycerophospholipids [GP]	0.5	0.99	0.032	8490	10800	11100	5670
PC 32:1	PC 32:1	C40H78NO8P	732.554	22.03	PC	Glycerophospholipids [GP]	0.5	0.99	0.02	128000	157000	152000	68400
PC 32:0e	PC 32:0e	C40H82NO7P	720.588	22.93	PC	Glycerophospholipids [GP]	1	1	0.136	44000	45300	88700	57900
PC 30:0e	PC 30:0e	C38H78NO7P	692.548	22.66	PC	Glycerophospholipids [GP]	2.1	0.99	0.148	5770	6290	9360	6750
PC 29:2	PC 29:2	C37H70NO8P	705.523	23.62	PC	Glycerophospholipids [GP]	4.2	0.95	0.158	1880	2040	1950	1860
PC 29:0	PC 29:0	C37H74NO8P	692.523	23.72	PC	Glycerophospholipids [GP]	2.3	0.3	0.178	2410	2320	2050	1470
PC 25:1	PC 25:1	C33H64NO8P	634.447	18.37	PC	Glycerophospholipids [GP]	2.9	0.32	0.21	15500	16000	24300	10400
PC 25:0	PC 25:0	C33H66NO8P	636.46	20.54	PC	Glycerophospholipids [GP]	0.5	0.96	0.036	56200	60900	46200	23000
PC 18:0/18:1(9Z)	PC 18:0/18:1(9Z)	C26H52NO7P	522.338	18.16	PC	Glycerophospholipids [GP]	1.5	0.87	0.002	14500	15200	33700	20300
PC 16:0	PC 16:0	C24H48NO8P	510.323	17.66	PC	Glycerophospholipids [GP]	6	0.97	0.08	2260	2270	2180	724
PC 14:0	PC 14:0	C22H44NO8P	482.292	16.55	PC	Glycerophospholipids [GP]	7.7	0.95	0.142	14800	14300	10800	13900
PC 13:0	PC 13:0	C21H42NO8P	485.299	22.08	PC	Glycerophospholipids [GP]	0.8	0.95	0.156	1790	1730	2170	1500
Oleyl alcohol	Oleyl alcohol	C18H36O	269.282	19.14		Fatty Acyls [FA]	6.8	0.72	0.002	174	189	592	379
Oleic acid	Oleic acid	C18H34O2	283.261	21.36	FA	Fatty Acyls [FA]	1.3	0.17	0.14	458	513	696	869
Octacosanoic acid	Octacosanoic acid	C28H56O2	442.458	26.22	FA	Fatty Acyls [FA]	7.6	0	1	5840	5980	5780	7700
Nonacosanoic acid	Nonacosanoic acid	C29H58O2	456.473	26.63	FA	Fatty Acyls [FA]	8.2	0.25	0.396	6830	6680	6560	9050
Neotigogenin	Neotigogenin	C27H44O3	417.332	20.09		Sterol Lipids [ST]	4.9	0.48	0.056	1860	1850	5170	8300
Myriocin	Myriocin	C21H39NO6	419.316	21.42	FA	Fatty Acyls [FA]	8.5	0.19	0.078	75100	75900	104000	145000
Monooleoylglycerol	Monooleoylglycerol	C21H40O4	374.329	20.05		Glycerolipids [GL]	3.6	0.03	0.294	2130	1890	4170	10900
MGDG 24:1	MGDG 24:1	C33H60O10	617.428	17.68	MGDG	Glycerolipids [GL]	1.1	0.61	0.36	12100	12500	6850	8630
Melissic acid A	Melissic acid A	C30H60O2	470.49	27.32	FA	Fatty Acyls [FA]	5.8	0.44	0.082	11900	11600	9430	14800
MAG 24:1	MAG 24:1	C27H52O4	441.391	22.43	MAG	Glycerolipids [GL]	4	0	1	7660	9200	7710	12700
MAG 22:5	MAG 22:5	C25H40O4	405.305	20.68	MAG	Glycerolipids [GL]	2.3	0.99	0.378	2660	2680	4320	6840
MAG 22:1	MAG 22:1	C25H48O4	413.362	21.84	MAG	Glycerolipids [GL]	0.4	0.99	0.354	7640	7590	11600	17300
MAG 21:1	MAG 21:1	C24H46O4	416.371	21.55	MAG	Glycerolipids [GL]	3.4	0.1	0.668	4820	4930	8320	12300
MAG 21:1	MAG 21:1	C24H46O4	399.346	21.53	MAG	Glycerolipids [GL]	0.6	0.05	1	9670	9440	15800	24300
MAG 20:1	MAG 20:1	C23H44O4	385.333	21.16	MAG	Glycerolipids [GL]	2.4	0.99	0.356	7710	7490	13000	24200
MAG 19:1	MAG 19:1	C22H42O4	388.35	21.37	MAG	Glycerolipids [GL]	0.6	0	1	16900	15800	16500	37800
MAG 19:1	MAG 19:1	C22H42O4	371.315	20.91	MAG	Glycerolipids [GL]	1	0	1	22800	23300	23400	35800
MAG 18:3	MAG 18:3	C21H36O4	370.301	19.07	MAG	Glycerolipids [GL]	0.3	0	1	2270	2490	3610	162
MAG 17:0	MAG 17:0	C20H40O4	345.299	20.05	MAG	Glycerolipids [GL]	1.2	0	1	2080	2060	2570	7120
MAG 16:1	MAG 16:1	C21H32N2O	346.291	19.54	MAG	Glycerolipids [GL]	1.5	0	1	2140	1430	1540	11100
MAG 16:1	MAG 16:1	C19H36O4	329.268	19.4	MAG	Glycerolipids [GL]	2.2	0	1	5940	5580	6560	35000
MAG 16:0	MAG 16:0	C19H38O4	348.311	19.81	MAG	Glycerolipids [GL]	0.4	0	1	11900	12700	21000	26100
MAG 16:0	MAG 16:0	C19H38O4	331.284	19.82	MAG	Glycerolipids [GL]	0.2	0	1	34300	35700	49200	54500
Lyso-PC 18:1(9Z)	Lyso-PC 18:1(9Z)	C44H86NO8P	788.613	23.29	LPC	Glycerophospholipids [GP]	2.6	0.72	0.002	108000	115000	121000	91500
Lyso-PC 18:0	Lyso-PC 18:0	C44H80NO8P	782.564	22.52	LPC	Glycerophospholipids [GP]	4.8	0.82	0.004	23800	25200	29600	18400
LPE 22:6	LPE 22:6	C27H44NO7P	526.293	18.7	LPE	Glycerophospholipids [GP]	0.8	1	0.46	1100	1140	1060	1190
LPE 22:6	LPE 22:6	C27H44NO7P	526.289	16.44	LPE	Glycerophospholipids [GP]	4.7	1	0.492	17900	17700	15700	18300
LPE 18:1	LPE 18:1	C23H44NO7P	478.29	16.73	LPE	Glycerophospholipids [GP]	2.3	0.25	0.19	18300	16900	7730	11800
LPE 15:1	LPE 15:1	C20H40NO7P	438.263	16.19	LPE	Glycerophospholipids [GP]	0.1	0	1	8710	8650	6590	8390
LPC 16:1	LPC 16:1	C24H48NO7P	494.321	18.54	LPC	Glycerophospholipids [GP]	7	0.93	0.07	1470	1650	8360	2760
Linoleic acid	Linoleic acid	C18H32O2	281.245	19.13	FA	Fatty Acyls [FA]	5.3	0.23	0.074	1490	1510	2390	4460
LDGTS 4:0	LDGTS 4:0	C14H27NO6	306.19	15.88	LDGTS	Fatty Acyls [FA]	2.1	0.22	0.548	8060	7220	562	1950
LDGTS 13:1	LDGTS 13:1	C23H43NO6	447.358	21.48	LDGTS	Fatty Acyls [FA]	6	0.09	0.792	45800	41800	50600	105000
Lanosterin	Lanosterin	C30H50O	427.385	22.71		Sterol Lipids [ST]	2.8	0.54	0.032	9390	10100	13500	25900
HexCer-NS d33:1	HexCer-NS d33:1	C39H75NO8	686.557	23.33	HexCER	Sphingolipids [SP]	0.3	0.2	0.196	11100	10700	10900	16200
HexCer-NS d32:1	HexCer-NS d32:1	C38H73NO8	672.539	22.96	HexCER	Sphingolipids [SP]	0.8	0.95	0.1	5180	4990	5640	8640
Hexadecyl Acetyl Glycerol	Hexadecyl Acetyl Glycerol	C21H42O4	359.316	20.43		Glycerolipids [GL]	0.2	0.67	0.002	26000	26800	31600	31700
Hexadecyl Acetyl Glycerol	Hexadecyl Acetyl Glycerol	C21H42O4	376.341	20.44		Glycerolipids [GL]	0.7	0.64	0.004	10700	11300	13200	14800
Hexacosanoic acid	Hexacosanoic acid	C26H52O2	414.427	25.3	FA	Fatty Acyls [FA]	6.2	0.22	0.464	6950	7240	7530	8620
Heptadecanoyl Ethanolamide	Heptadecanoyl Ethanolamide	C19H39NO2	314.307	21.63	FA	Fatty Acyls [FA]	3.1	0.01	0.262	6110	6560	8530	16700
GM3 d38:1	GM3 d38:1	C61H112N2O21	1226.8	22	GM	Sphingolipids [SP]	4.7	0.42	0.116	44900	46100	19900	29700
GM3 d32:0	GM3 d32:0	C55H102N2O21	1144.73	21.12	GM	Sphingolipids [SP]	4.3	0.42	0.172	1880	1890	775	208
GlcCer(d18:1/16:0)	GlcCer(d18:1/16:0)	C40H77NO8	700.57	23.55	CER	Sphingolipids [SP]	0.5	0.53	0.054	11000	10600	10500	14800
Ginsenoside Rh3	Ginsenoside Rh3	C30H50O4	475.38	23.21		Sterol Lipids [ST]	0.9	0.26	0.45	1650	1560	1730	1550
Dioctylphthalate	Dioctylphthalate	C24H38O4	408.313	20.9		Sterol Lipids [ST]	2.7	0.99	0.002	5450	5210	8290	12700
Dioctylphthalate	Dioctylphthalate	C24H38O4	391.284	20.9		Sterol Lipids [ST]	0.1	0.54	0.006	53300	54300	74600	91500
DGTS	DGTS	C42H81NO7	712.598	24.44	DGTS	Glycerolipids [GL]	5.5	0.99	0.042	7530	7170	6780	13200
DGDG 34:2	DGDG 34:2	C49H88O15	934.638	21.37	DGDG	Glycerolipids [GL]	7.3	0.58	0.748	72600	73700	15400	14600
DGDG 26:6	DGDG 26:6	C41H64O15	814.464	16.99	DGDG	Glycerolipids [GL]	5	0.5	0.776	12600	12400	8320	9900
DGDG 18:2	DGDG 18:2	C33H56O15	710.398	16.52	DGDG	Glycerolipids [GL]	0.6	0.5	0.808	9920	9430	4970	4230
DGDG 18:1	DGDG 18:1	C33H58O15	712.408	16.77	DGDG	Glycerolipids [GL]	3.5	0.5	0.772	18300	17300	11100	13400
DAG(34:2p)	DAG(34:2p)	C37H68O4	577.519	24.68	DAG	Glycerolipids [GL]	0.1	0.62	0.002	6160	6570	6940	13300
DAG(18:1/18:2)	DAG(18:1/18:2)	C39H70O5	636.554	24.4	DAG	Glycerolipids [GL]	3.4	0.74	0.002	4340	4260	4340	7060
DAG(18:1/18:1)	DAG(18:1/18:1)	C39H72O5	638.571	24.8	DAG	Glycerolipids [GL]	0.2	0.89	0.002	49700	49900	25200	41300
DAG(18:0/16:0)	DAG(18:0/16:0)	C37H72O5	614.566	25.21	DAG	Glycerolipids [GL]	6.3	0.95	0.002	22800	22100	19300	27300
DAG(16:0/16:0)	DAG(16:0/16:0)	C35H68O5	586.538	24.38	DAG	Glycerolipids [GL]	3.7	0.96	0.002	22300	21300	27100	43700
DAG(16:0/16:0)	DAG(16:0/16:0)	C35H68O5	569.51	24.46	DAG	Glycerolipids [GL]	5.9	0.9	0.004	4160	4010	4640	8480
DAG(16:0/14:0)	DAG(16:0/14:0)	C33H64O5	558.505	23.51	DAG	Glycerolipids [GL]	4.9	0.91	0.002	12200	11800	16100	26100
DAG 39:3	DAG 39:3	C42H76O5	678.606	25.31	DAG	Glycerolipids [GL]	2	0.1	0.656	3930	3990	2290	4300
DAG 38:5	DAG 38:5	C41H70O5	643.526	24.76	DAG	Glycerolipids [GL]	2.7	0.96	0.092	4930	4960	2800	3640
DAG 38:2	DAG 38:2	C41H76O5	666.603	25.61	DAG	Glycerolipids [GL]	1.8	0.96	0.084	7540	7700	5740	8420
DAG 36:7	DAG 36:7	C39H62O5	628.498	19.2	DAG	Glycerolipids [GL]	5	0.39	0.582	20400	21800	37900	48400
DAG 36:4	DAG 36:4	C39H68O5	617.512	24.59	DAG	Glycerolipids [GL]	5.7	0.96	0.028	3410	3390	3540	3450
DAG 34:7	DAG 34:7	C37H58O5	600.468	18.28	DAG	Glycerolipids [GL]	8.3	0.07	0.782	757000	721000	791000	535000
DAG 34:2	DAG 34:2	C37H68O5	610.537	24	DAG	Glycerolipids [GL]	4.6	0.82	0.09	12700	12300	13800	23800
DAG 34:1	DAG 34:1	C37H70O5	595.528	24.62	DAG	Glycerolipids [GL]	0.5	0.96	0.066	2290	2380	2260	3990
DAG 34:1	DAG 34:1	C37H70O5	612.554	24.56	DAG	Glycerolipids [GL]	2.5	0.94	0.074	30200	30600	27600	46900
DAG 33:2	DAG 33:2	C36H66O5	596.522	23.65	DAG	Glycerolipids [GL]	1.6	0.96	0.074	5830	5740	7330	13000
DAG 32:2	DAG 32:2	C35H64O5	582.508	23.37	DAG	Glycerolipids [GL]	0.1	0.91	0.07	13600	13300	16300	28700
DAG 32:1	DAG 32:1	C35H66O5	584.521	23.79	DAG	Glycerolipids [GL]	3.4	0.92	0.072	19700	19100	24500	43200
DAG 31:1	DAG 31:1	C34H64O5	570.506	23.4	DAG	Glycerolipids [GL]	4.1	0.95	0.084	10200	9950	13100	22900
DAG 31:1	DAG 31:1	C34H64O5	553.487	23.39	DAG	Glycerolipids [GL]	3.1	0.68	0.38	1540	1390	1660	2910
DAG 31:0	DAG 31:0	C34H66O5	572.52	23.78	DAG	Glycerolipids [GL]	6.4	0.95	0.106	12100	13400	17100	28100
DAG 30:6	DAG 30:6	C33H52O5	529.385	17.79	DAG	Glycerolipids [GL]	4.5	0.16	0.686	65100	65100	42100	7620
DAG 30:5	DAG 30:5	C33H54O5	548.433	21.69	DAG	Glycerolipids [GL]	2.4	0.6	0.374	1770	3200	2640	6950
DAG 30:5	DAG 30:5	C33H54O5	531.407	21.82	DAG	Glycerolipids [GL]	1.7	0.68	0.398	8710	8420	10500	11200
DAG 26:4	DAG 26:4	C29H48O5	477.345	18.26	DAG	Sterol Lipids [ST]	2.1	0.68	0.36	2150	2100	3880	1710
DAG 25:4	DAG 25:4	C28H46O5	463.345	17.9	DAG	Sterol Lipids [ST]	3.6	0.68	0.368	80900	76500	62100	41200
Coprostanone	Coprostanone	C27H46O	404.379	21.86		Sterol Lipids [ST]	0.2	0.19	0.006	20200	18500	8030	18800
CL 72:1	CL 72:1	C81H156O17P2	1464.09	22.21	CL	Glycerophospholipids [GP]	0.3	0.21	0.758	456	553	624	495
CL 70:6	CL 70:6	C79H142O17P2	1443	27.8	CL	Glycerophospholipids [GP]	3.7	0.99	0.058	489	655	342	124
CL 68:7	CL 68:7	C77H136O17P2	1412.96	24.13	CL	Glycerophospholipids [GP]	0.1	0.95	0.178	2760	2820	2030	1590
CL 68:5	CL 68:5	C77H140O17P2	1416.98	27.52	CL	Glycerophospholipids [GP]	3.9	0.99	0.08	607	704	427	156
CL 68:4	CL 68:4	C77H142O17P2	1418.99	28.19	CL	Glycerophospholipids [GP]	6.3	0.99	0.066	1210	2340	907	735
ChE(18:1)	ChE(18:1)	C45H78O2	668.633	35.89	ChE	Sterol Lipids [ST]	0.9	0.9	0.002	33500	32300	29300	48200
ChE(16:1)	ChE(16:1)	C43H74O2	640.601	33.71	ChE	Sterol Lipids [ST]	0.8	0.9	0.002	42800	45000	38900	55800
Cetyl myristoleate	Cetyl myristoleate	C30H58O2	468.475	26.54	FA	Fatty Acyls [FA]	2.2	0.21	0.106	31300	31800	29300	42400
Cetyl myristoleate	Cetyl myristoleate	C30H58O2	451.449	26.55	FA	Fatty Acyls [FA]	2.2	0.23	0.126	22800	23000	22000	30100
Cer-NS d43:1	Cer-NS d43:1	C43H85NO3	664.658	26.64	CER	Sphingolipids [SP]	1.1	0.99	0.008	16900	17500	27100	30000
Cer-NS d36:2	Cer-NS d36:2	C36H69NO3	564.539	24.52	CER	Sphingolipids [SP]	2.5	0.21	0.398	11200	12300	2780	43700
Cer-NS d28:1	Cer-NS d28:1	C28H55NO3	454.422	22.24	CER	Sphingolipids [SP]	5	0.2	0.566	2370	2200	3890	8290
Cer-NDS d34:0	Cer-NDS d34:0	C34H69NO3	540.533	25.72	CER	Sphingolipids [SP]	1.8	0.21	0.316	13400	9440	12000	19000
CE 18:2	CE 18:2	C45H76O2	666.615	34.5	CE	Sterol Lipids [ST]	4.2	0.97	0.006	6810	7000	6670	9320
Calcitriol	Calcitriol	C27H44O3	434.349	19.9		Sterol Lipids [ST]	2.7	0.71	0.002	1440	1600	2970	4470
C24:1 Lactosyl() Ceramide (d18:1/24:1)	C24:1 Lactosyl() Ceramide (d18:1/24:1)	C54H101NO13	972.732	23.53	CER	Sphingolipids [SP]	3.4	0.79	0.036	1200	1270	1740	2170
C2 Ceramide (d17:1/2:0)	C2 Ceramide (d17:1/2:0)	C19H37NO3	345.313	23.4	CER	Fatty Acyls [FA]	0.6	0.04	0.308	575	541	800	1310
C17:1 anandamide	C17:1 anandamide	C19H37NO2	329.317	26.44		Sphingolipids [SP]	0.1	0.03	0.308	1850	1940	1810	2410
C17 Glucosyl() Ceramide (d18:1/17:0)	C17 Glucosyl() Ceramide (d18:1/17:0)	C41H79NO8	714.585	23.77	CER	Sphingolipids [SP]	1.7	0.89	0.03	10500	9930	10400	23300
BMP 44:8	BMP 44:8	C50H83O10P	875.59	21.41	BMP	Glycerophospholipids [GP]	2.1	1	0.146	1110	1040	1770	2320
BMP 35:6	BMP 35:6	C41H69O10P	753.472	18.08	BMP	Glycerophospholipids [GP]	0.9	0.71	0.488	24300	22100	19400	8090
Acetyl tributyl citrate	Acetyl tributyl citrate	C20H34O8	420.256	16.09	FA	Fatty Acyls [FA]	5.7	0.42	0.202	22900	22000	10600	14800
Acetyl tributyl citrate	Acetyl tributyl citrate	C20H34O8	403.232	16.18	FA	Fatty Acyls [FA]	1.3	0.07	0.32	12300	11500	6190	7750
9E-Heptadecenoic acid	9E-Heptadecenoic acid	C17H32O2	269.246	20.97	FA	Fatty Acyls [FA]	5.1	0.22	0.128	1200	1260	1550	3920
9E-Heptadecenoic acid	9E-Heptadecenoic acid	C17H32O2	286.273	20.96	FA	Fatty Acyls [FA]	1.8	0.21	0.134	1050	1050	1370	3570
7a-Hydroxy-cholestene-3-one	7a-Hydroxy-cholestene-3-one	C27H44O2	401.348	20.9		Sterol Lipids [ST]	3.3	0.94	0.002	4360	4270	7310	18000
5a-Androstan-3b-ol	5a-Androstan-3b-ol	C19H32O	277.252	23.38		Sterol Lipids [ST]	0.7	0.73	0.004	270	255	341	662
3-Ketocholanic Acid	3-Ketocholanic Acid	C24H38O3	375.291	18.09	FA	Fatty Acyls [FA]	2	0.14	0.122	7550	7520	7190	6220
2(R)-hydroxydocosanoic acid	2(R)-hydroxydocosanoic acid	C22H44O3	374.362	28.27	FA	Fatty Acyls [FA]	0.9	0.01	0.852	118	137	205	220
2-Deoxycrustecdysone	2-Deoxycrustecdysone	C27H44O6	465.323	19.77		Sterol Lipids [ST]	0.9	0.27	0.016	2000	1560	2950	2520
19,28-Epoxy-3-oleananol	19,28-Epoxy-3-oleananol	C30H50O2	443.38	20.78		Fatty Acyls [FA]	5.7	0.2	0.076	4440	4130	6560	15100
11-Oxooctadecanoic acid	11-Oxooctadecanoic acid	C18H34O3	299.259	19.63	FA	Fatty Acyls [FA]	3.5	0.36	0.048	2960	2910	3750	8490
09:0 Lyso PC	09:0 Lyso PC	C17H36NO7P	398.23	15.77	LPC	Glycerophospholipids [GP]	3	0.35	0.172	736	1480	496	929
(None,)	-	C98H190O14	1592.43	27.31		(None,)	1.4	-	-	4130	4070	1770	4120
(None,)	-	C68H48O44	1569.15	22.78		(None,)	5.1	-	-	284	330	515	510
(None,)	-	C73H119N13O18	1483.93	22.16		(None,)	5.1	-	-	476	461	434	883
(None,)	-	C68H129N2O20P	1342.92	24.13		(None,)	1.5	-	-	334000	325000	248000	249000
(None,)	-	C68H129N2O20P	1325.9	24.12		(None,)	1.3	-	-	1430	1320	934	1100
(None,)	-	C73H122N3O15P	1312.87	22.17		(None,)	2.7	-	-	652	473	235	520
(None,)	-	C60H86N16O13	1256.69	17.11		(None,)	0.3	-	-	1800	1860	1400	1290
(None,)	-	C59H105N17O11	1245.86	30.32		(None,)	0	-	-	259	291	169	266
(None,)	-	C44H69N8O22P3S2	1236.35	25.85		(None,)	0.1	-	-	1030	1010	655	1670
(None,)	-	C51H94N7O17P3S	1219.59	34.28		(None,)	5.4	-	-	355	384	113	188
(None,)	-	C53H64O32	1213.34	37.55		(None,)	3.5	-	-	401	1040	328	33.8
(None,)	-	C64H107NO16P2	1208.71	20.39		(None,)	2.2	-	-	991	1010	737	573
(None,)	-	C55H96N16O13	1206.77	22.31		(None,)	3.8	-	-	594	555	295	394
(None,)	-	C56H85N17O12	1188.66	17.24		(None,)	0.4	-	-	2600	2730	1930	1750
(None,)	-	C44H57N8O27P	1178.33	36.21		(None,)	4.2	-	-	121	117	111	11.5
(None,)	-	C57H106N2O21	1172.77	17.74		(None,)	1.2	-	-	527	2200	32.4	3210
(None,)	-	C49H62N10O16S3	1143.36	31.33		(None,)	0.1	-	-	560	476	557	1120
(None,)	-	C51H38O30	1131.16	32.44		(None,)	2.8	-	-	2680	2430	2140	2510
(None,)	-	C51H52O28	1130.31	29.11		(None,)	5.6	-	-	7110	7000	4200	7380
(None,)	-	C54H90O23	1124.62	17.02		(None,)	0.4	-	-	3560	3900	2760	2760
(None,)	-	C57H112NO16P	1098.78	24.26		(None,)	1.8	-	-	1450	1570	2230	1140
(None,)	-	C53H78N10O14	1096.61	17.28		(None,)	2.8	-	-	3700	3650	2530	3320
(None,)	-	C50H78O25	1096.51	16.99		(None,)	5	-	-	190	108	44.4	184
(None,)	-	C53H88O22	1094.61	17.17		(None,)	0.2	-	-	3920	4240	3150	3730
(None,)	-	C52H90CaO20	1092.6	17.28		(None,)	3.8	-	-	4470	4610	3330	4080
(None,)	-	C47H76N16O13	1090.6	17.24		(None,)	6.5	-	-	4730	4860	3710	4220
(None,)	-	C48H30O30	1087.1	30.49		(None,)	7	-	-	9520	10200	6000	12000
(None,)	-	C51H86O23	1084.6	17.13		(None,)	4.8	-	-	4580	4900	3230	3110
(None,)	-	C49H51O26	1073.31	23.11		(None,)	3.7	-	-	41400	42200	15300	42300
(None,)	-	C52H81N7O15	1061.61	17.67		(None,)	5.1	-	-	2510	2730	2140	2280
(None,)	-	C48H78O22S	1056.5	16.44		(None,)	0.4	-	-	182	66.8	93.8	206
(None,)	-	C46H54O28	1055.29	28.31		(None,)	3.2	-	-	7180	7420	3710	7310
(None,)	-	C52H81N7O15	1044.58	17.35		(None,)	2.2	-	-	6210	5530	3850	4530
(None,)	-	C49H75N13O12	1038.58	17.01		(None,)	2.1	-	-	5190	5580	3460	3610
(None,)	-	C50H96O17P2	1031.61	19.83		(None,)	0.5	-	-	1040	1110	896	621
(None,)	-	C56H87NO16	1030.61	19.8		(None,)	3.1	-	-	1490	1410	1320	928
(None,)	-	C58H103NO13	1022.74	18.35		(None,)	5.2	-	-	567	515	268	843
(None,)	-	C52H85N3O13P2	1022.57	17.13		(None,)	6	-	-	5150	5650	3440	3530
(None,)	-	C49H87N3O15P2	1020.57	17.16		(None,)	0.6	-	-	5850	5830	3830	4900
(None,)	-	C49H74N10O12	1012.58	17.63		(None,)	0.5	-	-	3820	4250	2760	2130
(None,)	-	C51H46O21	1012.3	23.84		(None,)	4.4	-	-	2080	2000	977	3040
(None,)	-	C49H71N13O10	1002.56	17.3		(None,)	8.4	-	-	7790	7550	4450	5850
(None,)	-	C37H58N7O17P3S	998.285	22.58		(None,)	3.8	-	-	39600	37900	11500	40000
(None,)	-	C51H46O20	996.302	25.07		(None,)	6	-	-	292	292	168	386
(None,)	-	C63H115D5O6	995.968	48.12		(None,)	4.3	-	-	15800	15500	17000	400
(None,)	-	C48H80O20	994.551	16.83		(None,)	5.4	-	-	7640	7060	5140	5970
(None,)	-	C45H52O24	994.322	29.01		(None,)	2.7	-	-	407	415	627	1210
(None,)	-	C65H89D5O6	993.769	30.47		(None,)	0.7	-	-	125000	123000	65600	99800
(None,)	-	C55H104O13	990.78	31.27		(None,)	0.8	-	-	1580	1230	1040	2030
(None,)	-	C35H56N7O17P3S	989.303	52.35		(None,)	1.3	-	-	743	678	713	32.3
(None,)	-	C49H78O19	988.554	17.39		(None,)	5	-	-	7080	6950	4990	5850
(None,)	-	C47H84O16P2	984.553	17.24		(None,)	3.2	-	-	7540	7360	5060	4660
(None,)	-	C47H82O16P2	982.549	17.22		(None,)	5.7	-	-	6810	6480	5200	5240
(None,)	-	C54H102O13	976.771	34.54		(None,)	2.9	-	-	1980	2120	805	1010
(None,)	-	C50H80O13P2	968.541	17.36		(None,)	1.8	-	-	7680	8380	5420	6510
(None,)	-	C32H54N7O18P3S	967.281	22.1		(None,)	1.4	-	-	152	141	53.3	134
(None,)	-	C53H92NO12P	966.651	17.83		(None,)	6.9	-	-	12400	12300	6020	1980
(None,)	-	C49H57N9O12	964.42	17.31		(None,)	5.8	-	-	68.2	133	53.4	416
(None,)	-	C44H81NO21	960.534	17.1		(None,)	1.1	-	-	8750	8650	6140	7480
(None,)	-	C39H47N11O18	958.319	23.24		(None,)	0.5	-	-	5.5	19.6	7.5	14.9
(None,)	-	C46H72N10O12	957.541	17.52		(None,)	0.7	-	-	4350	4060	3170	3700
(None,)	-	C42H34O25	956.162	19.27		(None,)	0.4	-	-	5.88	4.09	8.12	36.1
(None,)	-	C61H99D5O6	955.845	34.54		(None,)	1.4	-	-	33600	34800	11200	16700
(None,)	-	C39H50O26	952.29	22.15		(None,)	0.1	-	-	365	348	159	317
(None,)	-	C42H46O24	952.273	30.52		(None,)	0.6	-	-	496	473	167	697
(None,)	-	C43H49O23	951.295	49.12		(None,)	4	-	-	722	688	637	25.1
(None,)	-	C61H93D5O6	949.8	32.22		(None,)	0.6	-	-	99500	96400	30800	45000
(None,)	-	C47H76O18	946.532	17.11		(None,)	2.1	-	-	7510	7910	5120	6560
(None,)	-	C42H40O25	945.195	22.06		(None,)	0.4	-	-	437	389	157	390
(None,)	-	C48H80O13P2	944.531	17.21		(None,)	8.7	-	-	10100	9910	6830	7600
(None,)	-	C48H78O13P2	942.54	17.6		(None,)	0.7	-	-	9350	1120	6700	1300
(None,)	-	C52H72O14	938.525	16.64		(None,)	0.5	-	-	9400	9090	6370	7380
(None,)	-	C50H72N6O6S2	934.522	17.28		(None,)	6.1	-	-	8920	8940	6050	7330
(None,)	-	C43H80O16P2	932.525	17.42		(None,)	1.2	-	-	8280	8170	5790	5570
(None,)	-	C55H70MgN4O6	924.546	17.72		(None,)	0.4	-	-	709	376	1670	405
(None,)	-	C56H40O12	922.284	24.4		(None,)	1.2	-	-	277	307	180	370
(None,)	-	C55H66MgN4O6	920.51	16.82		(None,)	5.9	-	-	8680	8790	6180	7430
(None,)	-	C39H50O24	920.303	28.16		(None,)	0	-	-	379	381	620	1460
(None,)	-	C54H94NO8P	916.681	22.13		(None,)	5.8	-	-	577	642	568	953
(None,)	-	C46H72O17	914.515	17.23		(None,)	0.1	-	-	9650	9380	6880	7400
(None,)	-	C50H70O14	912.513	17.35		(None,)	0.3	-	-	10200	10300	6330	7060
(None,)	-	C52H76O12	910.569	19.79		(None,)	0.8	-	-	1790	1860	1730	722
(None,)	-	C29H47N7O17P3S	908.232	23.61		(None,)	0.3	-	-	2460	2440	839	1870
(None,)	-	C45H73NO16	901.534	24.16		(None,)	5.9	-	-	724	646	511	347
(None,)	-	C46H74O16	900.539	19.5		(None,)	8.6	-	-	1260	1200	888	739
(None,)	-	C39H42N6O18	900.284	33.18		(None,)	3.6	-	-	71.7	76.7	61.5	99.4
(None,)	-	C56H96O7	898.742	35.27		(None,)	6.7	-	-	2860	2000	2060	2420
(None,)	-	C40H32O23	898.164	19.2		(None,)	1.5	-	-	78.8	34.3	91.8	496
(None,)	-	C47H72O15	894.515	17.52		(None,)	0.4	-	-	6560	6260	5670	5980
(None,)	-	C47H70O15	892.501	17.05		(None,)	2.9	-	-	8510	8780	4940	4400
(None,)	-	C41H80O16P2	891.497	17.3		(None,)	0.1	-	-	4680	4130	3340	3940
(None,)	-	C46H80O11P2	888.55	19.55		(None,)	6.3	-	-	1100	1220	708	811
(None,)	-	C44H70O17	888.503	16.97		(None,)	0.4	-	-	9180	10600	6450	7280
(None,)	-	C45H73NO16	884.497	17.2		(None,)	2.5	-	-	11300	10700	7170	8250
(None,)	-	C46H38O17	880.249	25.86		(None,)	2.9	-	-	269	260	139	223
(None,)	-	C27H42N7O17P3S	879.201	22.95		(None,)	5.3	-	-	72.1	68	101	295
(None,)	-	C42H68N2O16	874.492	17.36		(None,)	1.1	-	-	9990	9710	7000	7500
(None,)	-	C61H90O2	872.722	26.04		(None,)	4.4	-	-	1570	1560	1470	2450
(None,)	-	C54H94O7	872.739	34.74		(None,)	3.1	-	-	2290	2960	1160	2240
(None,)	-	C44H68O16	870.491	17.25		(None,)	5.7	-	-	13200	12600	7960	9550
(None,)	-	C38H69N3O15P2	870.425	19.6		(None,)	0.4	-	-	175	164	360	278
(None,)	-	C41H43NO20	870.253	40.14		(None,)	7.9	-	-	534	532	474	15.8
(None,)	-	C54H97D5O6	869.829	35.63		(None,)	2.9	-	-	14500	14100	16300	25200
(None,)	-	C43H62O18	867.401	16.68		(None,)	2	-	-	290	231	289	384
(None,)	-	C39H42O21	864.261	22.71		(None,)	4.7	-	-	2180	2300	1240	1700
(None,)	-	C53H94O7	860.74	27.4		(None,)	1.7	-	-	8120	7950	3480	15400
(None,)	-	C53H97D5O6	857.83	35.92		(None,)	2	-	-	26400	26300	36700	96.6
(None,)	-	C42H76O13P2	851.474	17.26		(None,)	2.9	-	-	4870	5740	2660	3220
(None,)	-	C36H41O22	843.24	25.31		(None,)	1.5	-	-	237	258	127	184
(None,)	-	C36H60N10O12	842.476	17.08		(None,)	0.4	-	-	6180	13200	3740	6010
(None,)	-	C40H72O13P2	840.48	17.39		(None,)	0	-	-	9910	10500	6740	8200
(None,)	-	C44H71NO13	839.539	26.36		(None,)	1.8	-	-	1150	1190	622	1040
(None,)	-	C57H86O4	835.664	23.98		(None,)	3.5	-	-	3300	3990	5910	6810
(None,)	-	C34H36N6O14S2	834.213	23.08		(None,)	4.6	-	-	3970	3910	1290	2850
(None,)	-	C46H40O15	833.241	38.2		(None,)	4	-	-	481	490	442	168
(None,)	-	C39H43O20	832.237	25.81		(None,)	4.5	-	-	10500	10700	3800	6860
(None,)	-	C38H62N4O16	831.401	16.56		(None,)	0	-	-	327	1160	490	159
(None,)	-	C51H91D5O6	827.78	32.77		(None,)	5.2	-	-	14900	14800	14900	21400
(None,)	-	C40H64O16	818.464	17.18		(None,)	2.5	-	-	12200	11000	5450	8100
(None,)	-	C35H44O21	818.274	22.79		(None,)	0.9	-	-	2350	2350	682	1160
(None,)	-	C36H32O21	818.171	31.92		(None,)	6.8	-	-	381	400	268	496
(None,)	-	C28H36N10O15P2	815.195	21.63		(None,)	0.9	-	-	223	222	26.1	44.7
(None,)	-	C22H36N7O17P3S	813.146	24.89		(None,)	1	-	-	94.5	111	188	206
(None,)	-	C50H82O7	812.634	23.2		(None,)	3.9	-	-	388	538	346	402
(None,)	-	C41H63NO14	811.468	17.57		(None,)	6.6	-	-	9090	6980	6660	5530
(None,)	-	C42H64O14	810.453	16.7		(None,)	2.9	-	-	10700	9910	6980	6880
(None,)	-	C43H66O14	807.448	16.53		(None,)	3.6	-	-	6630	6450	5060	5150
(None,)	-	C33H40O22	806.23	24.86		(None,)	4.7	-	-	217	218	144	126
(None,)	-	C33H40O22	806.236	27.31		(None,)	0.3	-	-	1920	1790	953	1510
(None,)	-	C36H36O20	806.208	32.04		(None,)	5.6	-	-	365	369	213	237
(None,)	-	C36H34O20	804.2	31.1		(None,)	0.6	-	-	229	253	163	299
(None,)	-	C39H63NO15	803.452	17.28		(None,)	0.3	-	-	7140	6810	5100	4950
(None,)	-	C34H40O21	802.235	24.78		(None,)	3.2	-	-	91.3	10.8	55.8	73.6
(None,)	-	C38H36O18	798.229	27.05		(None,)	0.9	-	-	104	109	55.4	90.2
(None,)	-	C41H64O15	797.435	16.33		(None,)	3.1	-	-	1850	2300	560	1780
(None,)	-	C38H68N2O13S	793.447	17.3		(None,)	2	-	-	6700	5960	3790	4400
(None,)	-	C37H39O18	789.251	30		(None,)	1.5	-	-	137	128	85.7	125
(None,)	-	C39H62O15	788.437	16.85		(None,)	3.6	-	-	12200	12100	7400	10100
(None,)	-	C43H60O12	786.446	16.68		(None,)	3.2	-	-	15400	15100	9450	10200
(None,)	-	C40H62O14	784.449	17.54		(None,)	2.3	-	-	11700	12500	7420	8530
(None,)	-	C32H38O21	776.232	21.16		(None,)	8.3	-	-	60200	60800	28900	39600
(None,)	-	C30H46O23	775.242	28.83		(None,)	6.8	-	-	81	92.3	115	228
(None,)	-	C36H61N5O13	772.432	16.84		(None,)	0.2	-	-	14400	13800	9390	12000
(None,)	-	C34H42O19	772.268	26.29		(None,)	0.2	-	-	373	363	460	1060
(None,)	-	C47H83D5O6	771.72	29.71		(None,)	2.6	-	-	20100	20200	15000	21500
(None,)	-	C43H55N5O7	771.439	17.35		(None,)	5.1	-	-	8920	8790	5850	5980
(None,)	-	C34H38O19	768.228	26.65		(None,)	8.4	-	-	2480	2600	1150	1600
(None,)	-	C40H62O14	767.416	19.35		(None,)	5	-	-	616	632	657	183
[truncated: 616 more rows]
